# Supplementary material for: Comparative “Golgi” Proteome Study of Lolium multiflorum and Populus trichocarpa
Source: Proteomes. 2016 Jul 20;4(3):23. doi: 10.3390/proteomes4030023 (PMC5217351; doi:10.3390/proteomes4030023)
Supplement: Supplementary file 1 [file proteomes-04-00023-s001.xlsx]

## Sheet: Table S1
Table S1. iTRAQ same-same trial to determine iTraq ratio cut-offs.
Sequence ID	Protein	Peptides	No. peptides	Protein Sequence	115:116 Protein ratio	115:117 Protein ratio	115:114 Protein ratio	116:114 Protein ratio	116:117 Protein ratio	117:114 Protein ratio	Peptide ratios 115:116	Peptide ratios 115:117	Peptide ratios 115:114	Peptide ratios 116:114	Peptide ratios 116:117	Peptide ratios 117:114	Std error 115:116	Std error 115:117	Std error 115:114	Std error 116:114	Std error 116:117	Std error 117:114
p4440	TPM=12.02 TMHMM=11 Putative ortholog: Os01g55040 1,3-beta-glucan synthase component, putative, expressed comp5187_c0_seq1_g1133	[IL][IL]EGF[IL]DTATGR, [IL][IL]TP[IL]YAVVSAEVASSR	2	YSPWRADQDLMDWLGAFFGFQRDNVRNQREHLVLLLANAQMRLSSADFSDTLEPRIARALRKKLLRNYASWCGFLGRRANVYVPDDDPRADLLYAGLHLLVWGEAANLRFMPECLCYVYHHMALELHRILEGFIDTATGRPANPAINGGEHAFLARIITPIYAVVSAEVASSRNGTAPHAAWRNYDDINEYFWRRDVFDRLGWPVEQSRQFFRTPPDRTRVRKTGFVEVRSFWNIYRSFDRLWVMLLLYLQAAAVVAWDDAKWPWQGFDRRAQVRVLSVFITWAALRFLQSLLDIGTQFRRAFRDGRMLAARMVLKAVAAAVWVLVFALLYKGIWNQRDSDRGWSQGTDARIMKFLYAAAVFLLPEALATLLFIIPWVRNALEKTNWKICYALTWWFQS…	1.015	0.955	1.055	1.035	0.94	1.105	0.92, 1.11	0.88, 1.03	0.96, 1.15	1.04, 1.03	0.95, 0.93	1.1, 1.11	0.095	0.075	0.095	0.005	0.01	0.005
p46032	TPM=34.51 TMHMM=2 comp2319_c0_seq1_g697	[IL]A[IL]EEE[IL]K, [IL]QA[IL][IL]ASADR	2	RLQALLASADRGADGPSLGGVLATAHQEKLALEEEIKALKASAAAADKEEDEEDEAAAPSTKDGLLASHGTVAAAAAAGAAATAAIAVLLLHLKSGVHAECEKPSYSLLGLIPGMCFLVFLTGQL	1.025	0.905	0.92	0.905	0.895	1.015	0.94, 1.11	0.96, 0.85	0.95, 0.89	1.01, 0.8	1.02, 0.77	0.99, 1.04	0.085	0.055	0.03	0.105	0.125	0.025
p45878	TPM=606.25 TMHMM=1 SignalP=yes comp226_c1_seq2_g124	[IL]AD[IL]PF[IL]EPYK, [IL][IL]DV[IL]EK	2	AAAGSSDGLSEFQKKVFDVLYKIADIPFLEPYKTKIIDVIEKGEKQPNITISIVASIVVVLVSILFRTLFGGKKAVAPVKPAAEVKKPSAPEADAAGSSGVTEEKEDEKDDTAAPRRRSRRET	1.04	1.2	1.025	0.99	1.155	0.855	1.11, 0.97	1.33, 1.07	1.12, 0.93	1.01, 0.97	1.2, 1.11	0.84, 0.87	0.07	0.13	0.095	0.02	0.045	0.015
p4316	TPM=30.97 TMHMM=4 Putative ortholog: Os03g36730 OST3/OST6 family protein, putative, expressed comp4962_c0_seq1_g342	[IL]ADSEQMDQSHFSR, [IL]ADSM[IL]EFVEAR	2	AASAGANNLVGELESLRSRSPSGVIHLTDTSVTRFLSSSTRPYSVLVFFDATSLHSKSDLHLPQLRREFALLSAAFQANNPASSDLFFADIEFSESQHSFSQFGVNSLPHVRLIRPHHSRLADSEQMDQSHFSRLADSMLEFVEARTGLQVGPITRPPLVSRNQIILLVVMFLASIPFVIKRILQGDTLLHDRRVWMAGALFVYFFSVSGGMYGIIRHTPMFITDRADPNKLVFFYQGSGMQLGAEGFAVGSLYTLVGLMIAVVTHLLVKVESLQTQRFAMVAVMIVGWWAVRKVIFLDNWKTGYSIHTFWPSSWR	1.06	0.935	0.995	0.945	0.89	1.075	1.11, 1.01	0.81, 1.06	0.96, 1.03	0.87, 1.02	0.74, 1.04	1.17, 0.98	0.05	0.125	0.035	0.075	0.15	0.095
p10115	TPM=107.17 Putative ortholog: Os11g05110 pyruvate kinase, putative, expressed comp869_c0_seq1_g652	[IL]GD[IL]SQT[IL][IL]FAK, [IL][IL]P[IL]NFSG[IL]AK	2	KKKKEEDNPAAVAASPPIRSERAKMHSTNLLLEEPIRMVSILEPSKPNFFPAMTKIVGTLGPKSRSVEAISACLKAGMSVARFDFSWGDAAYHQETLENLKLAIKATKKLCAVMLDTVGPELQVVNKSEVTISLEENESVVLTPHQGQEASSKLLPINFSGLAKALKPGDTIFVGQYLFTGSETTSVWLEVSEVQGDDVVCVIKNSATLAGSLFTLHCSQIHIDLPTLSDEDKDVMKKWGAPNKIDFLSLSYTRHAEDVRQAREYLSKLGDLSQTLIFAKIENVEGLNHFDEILEEADGIILSRGNLGIDLPPEKVFLFQKSALHKCNMAGKPAVVTRVVDSMTDNLRPTRAEATDVANAVLDGSDAILLGAETLRGLYPVETISTVGRICAEAEKVFN…	0.99	1.06	0.93	0.945	1.07	0.89	0.97, 1.01	0.99, 1.13	0.96, 0.9	0.99, 0.9	1.02, 1.12	0.98, 0.8	0.02	0.07	0.03	0.045	0.05	0.09
p4595	TPM=185.33 TMHMM=1 SignalP=yes Putative ortholog: Os02g19510 lysine ketoglutarate reductase trans-splicing related 1, putative, expressed comp542_c0_seq1_g37	[IL]PPG[IL]VVSETD[IL]YPR, [IL]WGEPSED[IL]T[IL]QPR	2	PALTAAMAKPGILGRSSMPRSNEGMRLIFSAVIGVMLGYLFGISFPTVNITKLHFPSSIVSYIEDRNSGITTQTLLNHAWTSANSHKKNNTDTKSDEIPKIYVTSNPKGAERLPPGIVVSETDLYPRRLWGEPSEDLTIQPRYLVTFTVGIGQKANIDAAVKKFSENFTIMLFHYDGRTTEWDEFDWSKRAIHVSVSKQTKWWYAKRFLHPDVVARYDYIFIWDEDLGVQHFNAEAYIKLVRKHGLEISQPGLEPDRGLTWQMTKRRGDREVHKVTEERPGWCSDPHLPPCAAFVEIMATVFSRDAWRCVWHMIQNDLVHGWGLDFALRKCVEPAHEKIGVVDAQWIVHQSVPSLGNQGKSENGKAPWEGVRGRCRKEWGIFQTRLADAEKKYYLDRGI…	1.11	0.99	0.945	0.855	0.895	0.96	1.1, 1.12	1.03, 0.95	0.92, 0.97	0.84, 0.87	0.94, 0.85	0.9, 1.02	0.01	0.04	0.025	0.015	0.045	0.06
p6019	TPM=78.54 TMHMM=2 SignalP=yes Putative ortholog: Os05g25310 acyl-CoA synthetase protein, putative, expressed comp901_c1_seq1_g910	[IL]PSSTDTAV[IL]MYTSGSTG[IL]PK, [IL][IL][IL][IL]AEPWTPESG[IL]VTAA[IL]K	2	MGEVTGENPSMPILERLGISDVPLVKEYGLPGVVGALLVALVIPILLSSMLGKKTKKRAVPADVGGEAGLAMRNSRFSSLVEVPWAGATTMAALFEMASKKYPQDRCLGTRKLIKSEFIEAADGRKFEKLHLGEYQWNSYSEAFTRASNFASGLIKMGHQVDSRAAIFSDTRAEWIIASQGCFRQNLTVVTIYASLGEDALVHSLNETQVSTLICDSKQLKKLPAVSSKLQSLRHVIYIEDEPVEADTLNQLKHLTTSSFTEVEELGKTSHIDARLPSSTDTAVIMYTSGSTGLPKGVMITHGNMVATIAAVRTIIPNLGTGDVYLAYLPLAHVFELAAETVMLASGVAIGYGSALTMTDASNKIKKGTKGDVSVLKPTLMISVPAILDRIRDAVFKKV…	1.035	1.09	1.01	0.97	1.055	0.925	1.05, 1.02	1.02, 1.16	0.97, 1.05	0.92, 1.02	0.98, 1.13	0.95, 0.9	0.015	0.07	0.04	0.05	0.075	0.025
p18230	TPM=20.66 Putative ortholog: Os07g48960 OsLonP3 - Putative Lon protease homologue, expressed comp4447_c0_seq1_g1414	[IL]Q[IL][IL]EASSSEFNVTR, [IL][IL]EF[IL]AVGK	2	AAAAAEAKAEDAVPAEGEAEGKASSAIVSTNPRPEDFLSVIALPLPHRPLFPGFYMPIYVKDPKLLQSLIENRKRSIPYAGAFLVKDEEGTDPSIVASPDSDNKSIDNLKGKELLKRLHEIGTLAQITSIQGDQVVLLGHRRLRITEMVEEDPLTVKVDHLKENTYNKDDDVIKATSFEVISTLREVLKTSSLWKDHVQTYIQHVGDFNYPRLADFGAAISGANKLLCQEVLEELDVDKRLKLTLELVKKDMEISKLQQAIAKAIEEKISGDQRRYLLNEQLKAIKKELGLETDDKTALSAKFRERIEAKKDKCPPHVLQVIEEELTKLQLLEASSSEFNVTRNYLDWLTVLPWGNYSNENFDVHHAQEILDEDHYGLSDVKERILEFIAVGKLRGTSQ…	0.985	0.96	0.995	1.01	0.975	1.04	0.97, 1.0	0.87, 1.05	0.97, 1.02	1.0, 1.02	0.9, 1.05	1.11, 0.97	0.015	0.09	0.025	0.01	0.075	0.07
p14679	TPM=27.69 Putative ortholog: Os03g11720 glycosyl hydrolase, family 31, putative, expressed comp4036_c0_seq1_g80	[IL]QVSEDS[IL]PSFQR, [IL]Q[IL]DEDYSTTTPPHR	2	RPRPLLLRLSALPPHALRLQIDEDYSTTTPPHRRFHVPDVLLPDVDSRTLHLSKPQTIAGASASTVALSSDLDAVVNHDPFQLTVRRAGSGDPVLSFNSHGLFDFEPLHESKPEGDTWEEQFRSHTDTRPRGPQSISFDVSFHGADFVYGLPEHGSTSLALRPTRGPGVEDSEPYRLFNLDVFEYLHESPFGLYGSIPFMIGHGPGTSSGFFWLNAAEMQIDVLAPGWDGAAPTENGRIDTLWMAEAGVVDAFFFVGSEPKDVIKQYISVTGTPSMPQQFAVAYHQCRWNYRDEDDVAGVDAGFDEHDIPYDVLWLDIEHTDGKRYFTWDRSTFPNPEEMQRKIADKGRKMVTIVDPHMKRDSGYYLHEEATAKGYYVKDASGNDYDGWCWPGSSSYPD…	1.055	0.915	0.995	0.955	0.875	1.095	0.94, 1.17	0.9, 0.93	0.96, 1.03	1.03, 0.88	0.96, 0.79	1.07, 1.12	0.115	0.015	0.035	0.075	0.085	0.025
p7587	TPM=90.14 Putative ortholog: Os08g37444 signal recognition particle receptor, putative, expressed comp1500_c1_seq1_g1303	[IL]SSTVQTAMEEA[IL]TR, [IL][IL]DG[IL][IL][IL]TK	2	MLEELLIFTRGGLILWSSCRALGLASPLKGSPIDALIRSCLLEERAADAGFTQDNYALRWAFSNDLGLVFVAVYQRMLHLLYVDDLLAAVRKEFSQIYDPKRVCYDDVFTDVFRQLHLEAEARAEAMKKTRQSNLPSSRAPASGGGKKPNALGGRAGPQGGGGGGKKGGAESGKDDSDSSDSGKEQNKLTNGTVKDARAVVVANNGKENGDPNDGAFDVNTLRKKIGGKKGGKKTDAAVGKKAAPKAEPKKNVKKDRVWDDQPRKVGKLDFTDPADERGEEMVERAIEHQGDSMMDKDEVLSSDSEDEDEEGEGEENAGAGQKKKGWFTSMFKSIAGNNVLEKADLQPALKALKDRLMTKNVAEEIAEKLCESVAASLEGKKLGSFTRISSTVQTAMEE…	0.92	0.895	0.885	0.96	0.975	0.995	0.97, 0.87	0.83, 0.96	0.9, 0.87	0.93, 0.99	0.85, 1.1	1.09, 0.9	0.05	0.065	0.015	0.03	0.125	0.095
p17650	TPM=28.3 Putative ortholog: Os03g05330 HEAT repeat family protein, putative, expressed comp4527_c0_seq1_g1458	[IL]SSVEA[IL]GEMVG[IL]VTR, [IL][IL]V[IL][IL]HNP[IL]AR	2	RAVSPPFSPRISSSSAMASPSSAAASAAALEAVQVLVASLADDSPRARDSALAALRDIAPLNPLLVLDCCATISRGGHRRFANMAGVFLVMASAVRALDRVDAEREFLRKIAKIATAEIVSSKDFNVDWQRAASTLLVAIGSHDPDLMMGEIFLYFSGPTSALPAMLQILADFASAEALQFTPRLKDVLLRVLPILGSVRDGQRPVFANAFKCWCQAAWLYIGDASSGLPFDDDVMSFMNSVFELLLKVWTGSRDLKVRLSSVEALGEMVGLVTRSQLKSALPRIIPAMLDLCKKDQEVAFTAAHSLHNLLNVSLLSESCPPLLEFEELNVVLITLLPLASFNNSKDERLYVSKGLKTYNELQHCFLVIGLAYPEDLCLFLLSKCRSKDEASIVGALGT…	0.985	0.965	1.02	1.04	0.98	1.06	0.95, 1.02	0.97, 0.96	1.04, 1.0	1.1, 0.98	1.02, 0.94	1.08, 1.04	0.035	0.005	0.02	0.06	0.04	0.02
p18553	TPM=13.92 Putative ortholog: Os02g40460 S1 RNA binding domain containing protein, expressed comp7801_c0_seq1_g832	A[IL][IL]AV[IL]PPEDDFPYTVR, GEA[IL]QN[IL]TESVK, SAADCDAQDVADAPTK	3	GRKVLESFREEFEIGGRLIAFETGKVARFANGSVVISMEDTNVLATVAAAKSSDPVRDFLPLTVDYQEKQFAQGVIPTTYMRREGAPKERELLCGRIIDRPIRPLFPRGFYHDVQITVNVLSSDGKQDPDVMAANASSAALMLSDVPWNGPIGVIRVGRIDGNFVLNPTVDELGLSDLNLVYACSRDKTLMIDVQAREITERDLQAGMKLAHSEAVKCIDPQIRLAKRAGKEKKEYKLSMISDESYEKIRTLSEAPIEEVFTDKTYGKFERGEALQNITESVKAKLEEECDEESLKFLPKAVDTVRKQVIRNRIIKEGLRVDGRQLDEVRPLFCESSTYPILHGSALFSRGDTQVLCTVTLGAPGDAQRLDSIVGPPTKRFMLHYSFPPFSINEVAKRG…	1.03	1.19333	0.993333	0.976667	1.14333	0.866667	0.87, 1.0, 1.22	0.92, 1.06, 1.6	0.86, 1.04, 1.08	0.99, 1.05, 0.89	1.06, 1.06, 1.31	0.93, 0.99, 0.68	0.102144	0.207311	0.0676593	0.0466667	0.0833333	0.0949269
p16572	TPM=74.13 Putative ortholog: Os11g24570 PPR repeat domain containing protein, putative, expressed comp5273_c0_seq4_g138	A[IL][IL]EDA[IL]EK, NE[IL]VGEAEA[IL]YK	2	PSSRGPVPQRTPGAPRPGSNRNALKLPEPASVLSGKRLDLHHRILALVRENDLDEAALLTRHSIYSNCRPTVFTCNAVLAALLRQARYADFLSLHRFVTQASVAPTVATHNLFIQAYCDCRRPETALEHFRLLLKDESPVLPSPTTYRILARSLAENGKLDLALELKDGMLERGLIAPDPQVYAFVMGGFVNAGDGDTAVSLYEELKEKLGGGPILDGVVYGNLMKGYFLKGMEKEAMDCYAEVLGEGSVVRFGAVSYNMVLDALGRNGKLDDAVLLFDRMCKEHDPPRKIAVNLGSFNVMVDAYCRVERFQDAVEVFGKMGEKRCTPDALSYNSLIDWLGKNELVGEAEALYKEMGERGINPDEYTYVLLIESCFRVDKVDDAVGYFNKMFDVGLRPN…	0.955	1.045	1.04	1.095	1.1	0.995	0.94, 0.97	1.05, 1.04	1.11, 0.97	1.18, 1.01	1.12, 1.08	1.06, 0.93	0.015	0.005	0.07	0.085	0.02	0.065
p417	TPM=132.31 TMHMM=1 Putative ortholog: Os09g21470 expressed protein comp1140_c0_seq1_g487	A[IL][IL]EEDVA[IL]K, A[IL][IL]EEDVA[IL]KR	2	RGENEVHRSLYETAHLHRGQNEKVAPLICPSSKSLSIFAVLEPPSLPSASAMAQPAFLSSLRSRLRTPPPPPHVQPRRAYHVELGAREKALLEEDVALKRFKSFKNNVKQVSKIGNILTLVVVAACSYQVAAVAASTQ	0.945	1.025	1.01	1.065	1.085	0.985	0.89, 1.0	0.95, 1.1	0.92, 1.1	1.03, 1.1	1.07, 1.1	0.97, 1.0	0.055	0.075	0.09	0.035	0.015	0.015
p60291	TPM=181.01 comp126_c1_seq1_g602	A[IL][IL]GSVGAEVDEAK, D[IL]AA[IL][IL]AAGR, FVAAY[IL][IL]AT[IL]GGNASPTK	3	THHTTSSSVRPPIRAPNPPTPPPPTIEKMRFVAAYLLATLGGNASPTKDDVRAILGSVGAEVDEAKLELLFREVDGKDLAALIAAGREKLAFASRGAAAAATPAAAAAEEKKEKVEEKEEDEDEEDLDMFSLFD	1.00667	0.93	0.933333	0.95	0.956667	1.00667	0.81, 1.2, 1.01	1.03, 0.88, 0.88	0.96, 0.93, 0.91	1.18, 0.77, 0.9	1.26, 0.74, 0.87	0.94, 1.05, 1.03	0.112596	0.05	0.0145297	0.120968	0.156241	0.0338296
p4405	TPM=679.47 TMHMM=1 SignalP=yes Putative ortholog: Os11g02130 peroxidase precursor, putative, expressed comp50_c0_seq1_g928	A[IL][IL]HSDQE[IL]FNGGAADAQVR, DMVA[IL]SGAHT[IL]G[IL]AR, SYVSSQEAFFK, TTGSGDNN[IL]AP[IL]D[IL]QTPTVFENAYYK	4	MYTVHRDRFSSYKYLLPALDRLIQKTSSRHYLPSYLANAPHCDYIMAARAVMLFSLVLALAIAGGASAQLSTGFYSYSCPDMLTAVRSALHPAIARERRVGASIVRLFFHDCFVQGCDASLLLDDAPGMQGEKNAAPNKNSARGFEVIDAVKAAVEKACPGVVSCADVLAVAAEESVVFLGGPSWEVKMGRRDSTTASFSGANNDIPPPTSGLANLTSLFAAKGLSQKDMVALSGAHTIGLARCTNFRDHIYNDTDIDAGFARSRQSNCPRTTGSGDNNLAPLDLQTPTVFENAYYKNLVQKRALLHSDQELFNGGAADAQVRSYVSSQEAFFKDFVVGMIKMGDVAPLTGSSGQIRKNCRRMK	0.99	1.02	0.98	0.99	1.035	0.96	0.97, 0.98, 0.87, 1.14	0.97, 1.01, 0.96, 1.14	0.95, 0.94, 0.9, 1.13	0.98, 0.96, 1.04, 0.98	1.0, 1.04, 1.1, 1.0	0.98, 0.93, 0.94, 0.99	0.0558271	0.0414327	0.0511534	0.0173205	0.0236291	0.0147196
p9106	TPM=299.47 Putative ortholog: Os01g55540 aminotransferase, classes I and II, domain containing protein, expressed comp271_c0_seq1_g1524	A[IL][IL]PFFDSAYQGFASGS[IL]DK, EY[IL]P[IL]TG[IL]ADFNK, GMFDEWTK, QQ[IL]FDA[IL]K, [IL][IL]FGADSPA[IL]QENR	5	PTRRPHPGAHTRTPLDSPRTEPETLARTVAEPRMPTANERAAHPSADRRLSTLRRHLLPSSPRTSPATATSADSLQASPTMASVFAAVAQGPEDPILGVTVAFNKDPSPVKVNLGVGAYRTEEGKPLVLNVVKRAEALLLQNQSRIKEYLPITGLADFNKLSAKLIFGADSPAIQENRVATVQCLSGTGSLRVGGEFLARHYHERTIYIPNPTWGNHPKIFTLAGLTVRTYRYYDPATRGLDFQGLLEDLSSAPSGAIILLHACAHNPTGVDPTVDQWEQIRQLMRSKALLPFFDSAYQGFASGSLDKDAQSVRMFVADGGELLMAQSYAKNMGLYGERVGALSIVCGSADVAVKVESQLKLVIRPMYSNPPLHGASIVATILSDRGMFDEWTKELKGM…	0.954	1	1.03	1.084	1.052	1.028	0.98, 1.02, 0.91, 0.88, 0.98	0.98, 1.07, 0.98, 1.02, 0.95	0.91, 1.01, 1.12, 1.06, 1.05	0.92, 0.99, 1.23, 1.21, 1.07	1.0, 1.05, 1.09, 1.16, 0.96	0.92, 0.94, 1.13, 1.04, 1.11	0.0256125	0.0207364	0.0347851	0.0604649	0.0348425	0.0428252
p9380	TPM=77.6 Putative ortholog: Os01g11054 phosphoenolpyruvate carboxylase, putative, expressed comp804_c0_seq1_g621	A[IL]ADGS[IL][IL]DF[IL]R, A[IL]PW[IL]FAWTQTR, DV[IL]EGDPY[IL]K, [IL]AD[IL]EAAPASVAR	4	MAAPPSVKAVMERHQSIDAQLRLLVPGKVSEDDKLVEYDALLVDRFLDILQDLHGPHLREFVQECYELSAEYETDRDEARIAELGAKLTSLSPADSIVISSSFSHMLNLANLAEEVQIANRRRTKLKRGDFGDEASAPTESDIEETLKRLVSDLGKSREEVFDALKNQTVDLVFTAHPTQSVRRSLLQKHGRIRDCLKQLYAKDITADDKQELDEALQREIQAAFRTDEIRRTPPTPQDEMRAGMSYFHETIWKGVPKFLRRIDTALKNIGINERLPYNAPLIQFSSWMGGDRDGNPRVTPEVTRDVCLLARMMAANLYFSQIEDLMFELSMWRCSDELRVRADEVHLSSKKSAKHYIEFWKQVPPNEPYRVILGDVRDKLYYTRERSRHILTTGISDI…	1.08	1.13	1.0575	0.9875	1.0575	0.945	1.3, 0.9, 1.03, 1.09	1.31, 1.21, 1.04, 0.96	1.21, 1.06, 0.92, 1.04	0.93, 1.18, 0.89, 0.95	1.01, 1.34, 1.0, 0.88	0.92, 0.88, 0.89, 1.09	0.0833667	0.0794775	0.0594944	0.0653676	0.0986893	0.0490748
p8083	TPM=109.56 Putative ortholog: Os02g10640 26S protease regulatory subunit, putative, expressed comp1250_c0_seq1_g620	A[IL]ASN[IL]DANF[IL]K, ES[IL]E[IL]P[IL]MNPE[IL]F[IL]R	2	GPDPVLPDGHNKTTAPHRARFQVLLCSAFFLGRKQSRSAAAEEAMAEADDAAAARRRTVVTDYRNKLLNCRELETRVRTARENLKKAKKDYDKTEDDLKSLQSVGQIIGEVLRPLDTERFIVKASSGPRYVVGCRSKVDKEKLTAGTRVVLDMTTLTIMRTLPREVDPVVYNMLHEDPGNVSYSAVGGLSDQIRELRESIELPLMNPELFLRVGIKPPKGVLLYGPPGTGKTLLARAIASNIDANFLKIVSSAIIDKYIGESARLIREMFNYAREHQPCIIFMDEIDAIGGRRFSEGTSADREIQRTLMELLNQLDGFDELGKVKMIMATNRPDVLDPALLRPGRLDRKIEIPLPNEQSRTEVLKIHAAGIAKHGEIDYEAIVKLAEGFNGADLRNVCT…	1.035	0.97	1.03	0.995	0.94	1.065	1.0, 1.07	1.03, 0.91	1.04, 1.02	1.04, 0.95	1.03, 0.85	1.01, 1.12	0.035	0.06	0.01	0.045	0.09	0.055
p83808	TPM=13.97 comp11076_c0_seq1_g114	A[IL]DDAEG[IL]VK, TPYTSG[IL]G[IL]EA[IL]GVETDK	2	TTCIEKRGTLGGTCLNVGCIPSKALLHSSHMYHEARTSFAHHGVKISNLEVDLPAMMAQKDKAVAGLTKGIEGLFKKNKVTYVKGFGKLASPSEVSVDLVDGGSTVVKGKNIIIATGSDVKSLPGITIDEKKIVSSTGALCLSGIPKKMVVIGAGYIGLEMGSVWNRLGSQVTVVEFAPDIVPSMDGEIRKQFQRMLEKQKMKFMLKTKVVGVDTSGDGVKLTLEPAAGGEQSILEADIVLVSAGRTPYTSGLGLEALGVETDKAGRILVDKRFKTNVNGVYAIGDAIPGPMLAHKAEEDGVACVEFLAGKEGHVDYDLVPGVVYTHPEVASVGKTEEQVKASGIAYRVGKFPLLANSRAKAIDDAEGLVKVVADKETDKILGVHIMAQNAGEIIHEAV…	0.95	0.975	0.97	1.02	1.025	1.005	0.89, 1.01	0.89, 1.06	1.0, 0.94	1.11, 0.93	1.0, 1.05	1.12, 0.89	0.06	0.085	0.03	0.09	0.025	0.115
p6762	TPM=110.81 Putative ortholog: Os01g22520 dihydrolipoyl dehydrogenase 1, mitochondrial precursor, putative, expressed comp1132_c0_seq1_g934	A[IL]DDAEGMVK, FSN[IL]EVD[IL]PAMMSQK, S[IL]PGVT[IL]DEK, VPYTAG[IL]G[IL]DA[IL]GVETDK, [IL]VSPSEVSVD[IL]VDGGST[IL]VK, [IL]VSSTGA[IL]A[IL]TE[IL]PK	6	AAAWASACRGYAASGEESDVVVIGGGPGGYVAAIKAAQLGLKTTCIEKRGALGGTCLNVGCIPSKALLHSSHMYHEAKSSFAHHGVKFSNLEVDLPAMMSQKDKAVAGLTKGIEGLFKKNKVEYVKGFGKLVSPSEVSVDLVDGGSTIVKGKNIIVATGSDVKSLPGVTIDEKKIVSSTGALALTEIPKKLVVIGAGYIGLEMGSVWNRLGSEVTVVEFAPDIVPSMDGEIRKQFQRMLEKQKFKFMLKTKVVGVDSSGSGVKLTVEPAAGGEQTVIEADIVLVSAGRVPYTAGIGLDAIGVETDKGGRVLVDKRFMTNVKGVYAIGDAIPGPMLAHKAEEDGVACVEFIAGKEGHVDYDTVPGVVYTHPEVASVGKTEEQVKASGVAYQVGKFPLLAN…	0.956667	1.01667	0.97	1.01667	1.06333	0.958333	0.88, 1.03, 0.91, 1.01, 0.95, 0.96	0.98, 1.08, 1.03, 1.1, 0.87, 1.04	0.91, 1.02, 0.94, 1.02, 0.94, 0.99	1.04, 1.0, 1.03, 1.0, 0.99, 1.04	1.12, 1.05, 1.12, 1.08, 0.92, 1.09	0.93, 0.95, 0.92, 0.92, 1.08, 0.95	0.0233333	0.033928	0.0189737	0.00918937	0.0306232	0.0249555
p4794	TPM=35.7 TMHMM=1 Putative ortholog: Os03g45260 vesicle transport v-SNARE protein, putative, expressed comp5857_c0_seq1_g430	A[IL]DEAYETGVA[IL][IL]QK, A[IL]DV[IL]NTVG[IL]SNSV[IL]K	2	DGVARVERLASAPTSYSYSSSVPLVGGGGAGDPAATDEVRLVVAQIQGLCAQLDRLWRSIPAKGQRDLWKRKVEQLSEEVESLKETLDKHSFRQRKRILEAKERAELFERANGESSHVLQIFDDEAQARQSARTSARALDEAYETGVAILQKYSDQRDRLKSAQRKALDVLNTVGLSNSVLKLIERRHRVDKKIAYGGMILTVVLMVAFWRLTH	0.995	1.075	1.015	1.025	1.085	0.94	1.03, 0.96	1.1, 1.05	1.03, 1.0	1.0, 1.05	1.07, 1.1	0.93, 0.95	0.035	0.025	0.015	0.025	0.015	0.01
p8908	TPM=204.44 Putative ortholog: Os08g37320 expressed protein comp606_c0_seq1_g1090	A[IL]DWDGMAK, MSTMTADEYFEK, TFEDVNHQ[IL]QTK, YSQEPQP[IL]DWEYYR, [IL]DKE[IL]AE[IL]R	5	MSGVKKVTDLASKAGKAIDWDGMAKMLVSEEARKEFANLRRTFEDVNHQLQTKYSQEPQPIDWEYYRKGIGAKVVDMYKQAYDSIEIPKFVDTVTPEYKPKFDALVVELKEAEKTSLKESERIDKEIAELREMKKKMSTMTADEYFEKHPELKKKFDEEIRNDYWGY	1.138	1.228	1.118	0.99	1.112	0.902	0.95, 0.97, 0.92, 1.88, 0.97	1.15, 0.94, 1.16, 1.69, 1.2	1.0, 0.87, 0.96, 1.74, 1.02	1.04, 0.9, 1.04, 0.92, 1.05	1.21, 0.96, 1.25, 0.9, 1.24	0.87, 0.93, 0.83, 1.03, 0.85	0.185726	0.124073	0.15762	0.0328634	0.0751931	0.0361109
p20470	TPM=35.85 Putative ortholog: Os01g54940 dehydrogenase, putative, expressed comp6239_c0_seq1_g1025	A[IL]DYTTEDTESAVTGK, FDAV[IL]DT[IL]GVPETER, GGHYMT[IL]QGEAAA[IL]ADR, YG[IL][IL]VG[IL]PAATAA[IL][IL]NK	4	AAGAERISRAVVVPRFGGPEVLELRQGVPVPDLKPGEVLVRARAVSINPLDLRMRSGYGRCIFEPLLPLIIGRDISGEVAATGTSVSSFSIGQEVYGALHPTAIRGTCADYAVLSQDELTPKPSTLTHVEASAIPFAALTAWRALHGTAGISEGQRVLVIGGGGAVGLSAVQLAVAAGCSVSATCGAQSIEQVLAAGAEKAIDYTTEDTESAVTGKFDAVLDTIGVPETERSGINLLRRGGHYMTLQGEAAALADRYGLIVGLPAATAALLNKQMQYRCSHGIEYCWTYMRADPEGLHEIQRLSGAGKLQIPVEKTFPISQVKAAHEAKEKRLVPGKVVLEFD	1.005	0.9825	0.965	0.9625	0.9825	0.9875	0.99, 1.08, 0.94, 1.01	0.96, 0.92, 1.01, 1.04	0.98, 0.98, 0.91, 0.99	0.99, 0.91, 0.97, 0.98	0.97, 0.85, 1.08, 1.03	1.03, 1.06, 0.9, 0.96	0.0290115	0.0265754	0.0184842	0.0179699	0.0495606	0.0359108
p6556	TPM=149.34 Putative ortholog: Os05g11780 mitochondrial carrier protein, putative, expressed comp571_c0_seq1_g546	A[IL]EANDGKP[IL]P[IL][IL]QK, M[IL]AEGGPSSFYK, YPYTGS[IL]DCAMQT[IL]K, [IL]Q[IL]GEGSAAQVTK	4	QRHQRSRPPPPAPFLARIALPRSQPGQISPAGLGRRRGEQMADAKQQAAAPSGVWKTIKPFVNGGASGMLATCVIQPVDMIKVKIQLGEGSAAQVTKKMLAEGGPSSFYKGLSAGLLRQATYTTARLGSFRVLTNKAIEANDGKPLPLIQKAFIGLTAGAIGATVGSPADLALIRMQADSTLPAAQRRHYKNAFQALYRISADEGVLALWKGAGPTVVRAMSLNMGMLASYDQSVELFRDKFGAGEISTVVGASAISGFFAAACSLPFDFVKTQIQKMQPDATGKYPYTGSLDCAMQTLKSGGPLKFYTGFPVYCVRIAPHVMMTWIFLNQIQKFEKKIGI	0.97	1.1175	0.9175	0.9575	1.1525	0.8425	0.98, 0.83, 1.12, 0.95	1.27, 0.87, 1.21, 1.12	0.89, 0.98, 1.01, 0.79	0.91, 1.18, 0.9, 0.84	1.3, 1.05, 1.08, 1.18	0.7, 1.13, 0.83, 0.71	0.0595819	0.0880696	0.0495606	0.07576	0.0564764	0.100281
p6454	TPM=909.56 Putative ortholog: Os02g37862 60S ribosomal protein L6, putative, expressed comp87_c1_seq2_g365	A[IL]EAVPE[IL]K, KTEGE[IL]FETEK, SG[IL][IL][IL][IL]TGPFK, ST[IL]TPGTV[IL][IL][IL][IL]AGR, VD[IL]SCVK	5	RNESVLCHARPSILLLPPPPPPSSLPDPQRRRRSRLHPMAPSSKMALGIKRASRSNTYHRRGLWAIKAKNGGAFPKAATPAAAAEPKFYPADDVKPRTVSTRKPKPTKLRSTITPGTVLILLAGRYMGKRVVFLKQLKSGLLLITGPFKINGVPVRRVNQTYVIATSTKVDISCVKVDKFDDKYFAREKKTRAKKTEGELFETEKEATKNLPDFKKDDQKAIDGELIKAIEAVPELKNYLSARFSLRDGDKPHEMSF	1.024	1.132	1.062	1.038	1.11	0.948	1.02, 1.0, 0.9, 1.04, 1.16	0.96, 1.23, 1.16, 1.0, 1.31	0.96, 1.11, 0.99, 1.15, 1.1	0.94, 1.11, 1.09, 1.1, 0.95	0.94, 1.23, 1.29, 0.96, 1.13	1.0, 0.9, 0.85, 1.15, 0.84	0.0416653	0.0667383	0.0367967	0.0381314	0.070214	0.0579137
p9865	TPM=254.04 Putative ortholog: Os09g02700 polyadenylate-binding protein, putative, expressed comp291_c1_seq1_g22	A[IL]EM[IL]NFTP[IL]NGR, DTAVSQP[IL]P[IL]GA[IL]ATA[IL]ANAPPDQQR, FGT[IL]TSVVVMR, N[IL]DDTVDDEK[IL]R, S[IL]GYAYVNYNTPADAAR	5	FPATSLYVGDLDVSVQDAQLFDVFAQIGGVVSVRVCRDVTTRKSLGYAYVNYNTPADAARALEMLNFTPINGRPIRIMYSNRDPSLRKSGNANIFIKNLDKSIDNKALSDTFCVFGNILSCKVATDASGESKGYGFVQYERDEAAHAAIEKLNGMLMNDKKVYVGPFVRKQERDNSPGNVKFNNVFVKNLAETTTEDDLKEIFGKFGTITSVVVMREGDGRSKCFGFVNFESPDEAALAVQDLNGKKFGEKEWYVGRAQKKSEREMELKEKFEKNLQEAADKYQNTNLYLKNLDDTVDDEKLRELFAEYGTITSCKVMRDSNGASRGSGFVAFKTAEEASRALSEMNNKMVGNKPLYVALAQRKEDRKARLQAQFSQMRPVPMAPNVGPRMAMFPPGVP…	1.04	0.914	0.97	0.934	0.878	1.076	0.98, 1.07, 1.08, 0.98, 1.09	0.72, 1.05, 0.98, 0.87, 0.95	0.94, 0.95, 1.06, 0.93, 0.97	0.95, 0.89, 0.98, 0.95, 0.9	0.73, 0.99, 0.91, 0.89, 0.87	1.3, 0.9, 1.08, 1.07, 1.03	0.0246982	0.0564447	0.0234521	0.0169115	0.0422374	0.0645446
p9677	TPM=173.69 Putative ortholog: Os05g25850 superoxide dismutase, mitochondrial precursor, putative, expressed comp581_c0_seq1_g1098	A[IL]EQ[IL]DAAVSK, GDASAVVQ[IL]QGA[IL]K, NVRPDY[IL]NN[IL]WK, [IL]GWA[IL]DEDFGSFDK, [IL]SVETTANQDP[IL]VTK	5	DQPPYIIGGISPSSSHQENKRHAAMALRTLASKKTLAAALGGARPLATRGVATFTLPDLPYDYGALEPAISGEIMRLHHQKHHATYVANYNKALEQLDAAVSKGDASAVVQLQGAIKFNGGGHVNHSIFWKNLKPANEGGGEPPHGKLGWAIDEDFGSFDKLVKKMNAEGAALQGSGWVWLALDKEAKKLSVETTANQDPLVTKGANLIPLLGIDVWEHAYYLQYKNVRPDYLNNIWKVVNWKYAGEEYENVAV	0.964	1.038	0.98	1.014	1.078	0.944	0.96, 1.01, 1.02, 0.91, 0.92	0.96, 1.09, 1.07, 1.01, 1.06	0.91, 1.05, 1.08, 0.88, 0.98	0.95, 1.04, 1.06, 0.96, 1.06	1.0, 1.09, 1.05, 1.1, 1.15	0.95, 0.96, 1.02, 0.87, 0.92	0.0224944	0.0235372	0.0386005	0.0244131	0.0251794	0.0246171
p2191	TPM=44.19 TMHMM=6 Putative ortholog: Os01g61780 vacuolar ATP synthase 98 kDa subunit, putative, expressed comp2100_c0_seq1_g1152	A[IL]ESVGSQ[IL]WR, FTNAYQE[IL]VDAYGVGR, F[IL]GTSEMDPDSEPDSAR, YNE[IL]FEFK	4	MGLLDRLPPMDHLRSEKMCFVQLIFPAETARLAVTYLGEVGLIQFKDLNEDKSPFQRIFVNQVKRCAEMSRKLKFFSDQINRAGVRSSVRPALQPEIDLEELEAKLGEHEHELLEMNSNSGTLQQRYNELFEFKLVLSKAGRILAASQNHATPSDLELDEHIYDKEVDEGNSYLLEQGIQGASESGVRFVSGIVLKSKALAFETMLFRSTRGNMFFNQAPAGEPVTDPISGEEVEKTVFVVYFSGEQTKAIILRICASFGASCYPVPEEMVKQRQIFREVSSRLSDLEVTLDAGIQHRNKALESVGSQLWRWIIMVKKEKAVYDTLNMLNFDVTKKCLVGEGWCPIFAKSQIEDVLQRATLHSNSQVGIIFHEMDTIDSPPTYFRTDKFTNAYQEIVDA…	1.035	0.9325	1	0.99	0.93	1.075	0.94, 1.12, 1.26, 0.82	0.99, 1.04, 0.79, 0.91	1.01, 1.16, 0.91, 0.92	1.08, 1.04, 0.72, 1.12	1.05, 0.93, 0.63, 1.11	1.03, 1.12, 1.14, 1.01	0.0970824	0.0545245	0.0578792	0.0914695	0.106771	0.0322749
p13427	TPM=51.7 Putative ortholog: Os02g57240 oxidoreductase, aldo/keto reductase family protein, putative, expressed comp3054_c0_seq1_g1115	A[IL]EV[IL]P[IL][IL]TPEV[IL]EK, [IL]D[IL]VGP[IL]VEQPEYN[IL]FSR	2	MQYNNLGRSGLRVSQLSYGAWVTFGNQLDVKEAKALLQAARDAGVNFFDNAEVYANGRAEEIMGQAMRDLGWRRADVVVSTKLFWGGQGPNDKGLSRKHLVEGLRASLKRLDMDYVDVVYCHRPDATTPIEETVRAMNWVIDQGWAFYWGTSEWSAQQITEAWGVANRLDLVGPIVEQPEYNLFSRHKVESEFVPLYNTYGIGLTTWSPLASGVLTGKYSKGNIPAESRFSLDNYKNLANRSLVDDTLRKVNGLKPIASELGVSLAQLSIAWCASNPNVSSVITGATKESQIVENMKALEVIPLLTPEVLEKIEAVVQSKPKRLESYR	0.995	1.04	1.1	1.105	1.05	1.055	0.94, 1.05	1.07, 1.01	1.08, 1.12	1.15, 1.06	1.14, 0.96	1.0, 1.11	0.055	0.03	0.02	0.045	0.09	0.055
p16149	TPM=33.25 Putative ortholog: Os07g10600 cycloartenol-C-24-methyltransferase 1, putative, expressed comp4287_c0_seq1_g744	A[IL]EY[IL]G[IL]APEGSQR, D[IL]AVDSP[IL]PWY[IL]P[IL]DPSR, E[IL]FTPMYFFVVR, FSSTSVTG[IL]NNNDYQ[IL]TR, TGA[IL]D[IL]ASG[IL]GGK	5	SSSRLPITFQLCPDLSSTACPLVLLPSPHKSSATASRDLLPPVATMSKTGALDLASGLGGKINKEGVKSAVDEYEKYHGYYGGKEESRKFNYTDMVNKYYDLSTSFYEYGWGESFHFAHRWSGESLRESIKRHEHFLALQLELKPGMKVLDVGCGIGGPLREIARFSSTSVTGLNNNDYQITRGKELNRLAGLSGTCDFVKADFMNMPFSDNTFDAVYAIEATCHAPDPVGCYKEIYRVLKPGQCFAVYEWCITDHYDANNATHKRIKDEIELGNGLPDIRSTKQCLQAVKDAGFEVIWDKDLAVDSPLPWYLPLDPSRFSLSSFRLTTVGRLVTRNMVKALEYIGLAPEGSQRVSNFLEKAADGLVEGGKKEIFTPMYFFVVRKPLSE	1.07	1.036	0.948	0.898	0.962	0.95	1.04, 1.37, 1.1, 0.86, 0.98	0.98, 1.5, 0.93, 0.69, 1.08	1.04, 1.07, 0.94, 0.75, 0.94	1.0, 0.79, 0.86, 0.87, 0.97	0.95, 1.1, 0.85, 0.8, 1.11	1.06, 0.71, 1.02, 1.09, 0.87	0.0848528	0.132537	0.0559821	0.0383927	0.0631981	0.0709225
p7572	TPM=115.07 Putative ortholog: Os02g10070 citrate synthase, putative, expressed comp1046_c0_seq1_g1262	A[IL]G[IL]P[IL]ERPK, FWEPTYEDS[IL]N[IL][IL]AR, GMTGM[IL]WETS[IL][IL]DAEEG[IL]R, SMG[IL]GSQ[IL][IL]WDR, SQ[IL]QEM[IL]PEQQDR, SVMEETGSN[IL]TTDQ[IL]K, VVPGYGHGV[IL]R, [IL]YEVVPP[IL][IL]TE[IL]GK	8	MAFFRGLTAVSRLRSRMGHDATTLGGVRWLQMQSASDLDLKSQLQEMIPEQQDRLKKLKSEHGKVQLGNITVDMVLGGMRGMTGMLWETSLLDAEEGIRFRGLSIPECQKVLPTAVKDGEPLPEGLLWLLLTGKVPTKEQVDALSKDLASRSTVPGHVYKAIDALPVTAHPMTQFTTGVMALQVESEFAKAYEKGIHKSKFWEPTYEDSLNLIARLPQVASYVYRRIFKDGKTIAADNTLDYAANFSHMLGFDDPKMLELMRLYITIHTDHEGGNVSAHAGHLVGSALSDPYLSFAAALNGLAGPLHGLANQEVLLWIKSVMEETGSNITTDQLKEYVWKTLKSGKVVPGYGHGVLRNTDPRYSCQREFALKYLPEDPLFQLVSKLYEVVPPILTELGK…	0.965	0.985	1.0125	1.0525	1.02125	1.03375	1.02, 1.08, 0.99, 0.84, 0.95, 0.92, 0.95, 0.97	1.17, 0.95, 0.92, 0.85, 0.97, 1.0, 0.93, 1.09	1.04, 1.02, 0.92, 1.0, 1.02, 0.98, 1.11, 1.01	1.02, 0.94, 0.92, 1.2, 1.07, 1.06, 1.16, 1.05	1.15, 0.88, 0.93, 1.01, 1.02, 1.08, 0.98, 1.12	0.89, 1.07, 0.99, 1.18, 1.05, 0.98, 1.18, 0.93	0.025	0.0359563	0.018969	0.0340562	0.032702	0.037935
p2924	TPM=61.33 TMHMM=1 Putative ortholog: Os07g40620 saccharopine dehydrogenase, putative, expressed comp2769_c0_seq1_g960	A[IL]G[IL]WVMK, VEAD[IL]HEVAAR, VTQHPEG[IL]PGVEETPDFAER, [IL]EENG[IL]SFDV[IL]SR, [IL]PSADTVVVK	5	SPAPDVPILVADASDPASLAALASRARVLLSCAGPFRLYGHQVAAACAEAGADCLDISGEPEFMERVEADLHEVAARNGSLIVSACGFDSIPAELGFFFNSRQWDPPSAPVSIVAHLSLESHKKIVGNFATFESAVLGFASASKLQALRRSRPRLAKPRIPGPPPPTGPLIKHDKALGLWVMKLPSADTVVVKRTLSKVTQHPEGLPGVEETPDFAERRQEFWSSVKPAHFGVKIGTRSILGVIPMICTGLFIGILGGFSFGRSLLLKFPALFSMGWFRKSGPTEAEVSSASFKMWFVGHGYGDLTRAAGRGGKPDKEIVTRVSGPEIGYITTPIVLIQSALVLLSQRGNLPKGGVYTPGAVFGPTDLQKRLEENGLSFDVISRRTLP	0.946	0.978	0.99	1.046	1.036	1.016	0.84, 0.94, 0.94, 1.0, 1.01	0.97, 0.98, 0.99, 0.89, 1.06	0.98, 0.97, 0.99, 1.01, 1.0	1.16, 1.03, 1.05, 1.01, 0.98	1.16, 1.04, 1.05, 0.88, 1.05	1.01, 0.99, 1.0, 1.14, 0.94	0.0302655	0.0270924	0.00707107	0.0307571	0.0447884	0.0332566
p10357	TPM=87.01 Putative ortholog: Os03g44150 aminotransferase, putative, expressed comp1797_c0_seq1_g1504	A[IL]GAGVVPVSAV[IL]ADK, GFGP[IL]VPGH[IL]K, VDFGD[IL]TG[IL]EK	3	EGGRVTVVIAVGRGGALGHGDDELALGVGGGGQGGARAGREAEPPAVELEGRGPVVVGADPDASGQVPHDDLGDAGVDLDGVGARAPRGEALGGGDEAELRRVLLDGDVGVGGEGQLEHLGEDVREAPQLLRSARGGGGGAVVGGAHSDGAGLQRAQLPPDSNVNQGHCHPKVLKALIEQAERLTLSSRAFYNDKFPVFAEYLTSMFGYDMMLPMNTGAEGVETAIKLARKWGYEKKKIPKDEALIVSCCGCFHGRTLGVISMSCDNDATRGFGPLVPGHLKVDFGDITGLEKIFKEHGDRICGFLFEPIQGEAGVILPPDGYLKSVRDLCSQYNILMIDDEIQTGIARTGKMLACDWEDVRPDMVILGKALGAGVVPVSAVLADKDIMLCIKPGEHGS…	0.936667	1	0.99	1.05667	1.06333	0.996667	0.94, 0.91, 0.96	0.92, 1.05, 1.03	0.97, 1.03, 0.97	1.03, 1.13, 1.01	0.97, 1.15, 1.07	1.06, 0.98, 0.95	0.0145297	0.0404145	0.02	0.0371184	0.0520683	0.0328295
p55962	TPM=992.02 comp99_c1_seq1_g1204	A[IL]GDY[IL]GVK, G[IL]DV[IL]QQAQSGTGK, KGVA[IL]NFVTR, MFV[IL]DEADEM[IL]SR, V[IL][IL]TTD[IL][IL]AR, [IL]QVGVFSATMPPEA[IL]E[IL]TR, [IL][IL]ASGVHVVVGTPGR	7	MAGMAPEGSQFDAKHYDTKMTELLSQGDTEEFFTSYDEVHESFDDMGLQENLLRGIYAYGFEKPSAIQQRGIVPFCKGLDVIQQAQSGTGKTATFCSGILQQLDYGLVDCQALVLAPTRELAQQIEKVMRALGDYLGVKVHACVGGTSVREDQRILASGVHVVVGTPGRVFDMLRRQSLRPDHIKMFVLDEADEMLSRGFKDQIYDIFQLLPGKIQVGVFSATMPPEALEITRKFMNKPVRILVKRDELTLEGIKQFYVNVEKEEWKLDTLCDLYETLAITQSVIFVNTRRKVDWLTDKMRGRDHTVSATHGDMDQNTRDIIMREFRSGSSRVLITTDLLARGIDVQQVSLVINYDLPTQPENYLHRIGRSGRFGRKGVAINFVTREDERMLFDIQKFY…	0.934286	0.952857	0.945714	1.01429	1.02286	1	0.86, 0.99, 0.99, 0.94, 0.9, 0.93, 0.93	1.08, 1.05, 0.98, 0.93, 0.87, 0.81, 0.95	0.9, 1.01, 1.03, 0.89, 1.0, 0.83, 0.96	1.05, 1.01, 1.04, 0.96, 1.12, 0.89, 1.03	1.26, 1.06, 0.99, 1.0, 0.96, 0.87, 1.02	0.84, 0.96, 1.05, 0.96, 1.16, 1.02, 1.01	0.0175739	0.0359043	0.0280185	0.0275039	0.0453932	0.0369685
p10370	TPM=20.37 Putative ortholog: Os03g51140 HEAT repeat family protein, putative, expressed comp1892_c0_seq1_g1552	A[IL]HDGFSEND[IL]K, D[IL]GPGVE[IL]GDTNW[IL]GR, EVVVP[IL]TGP[IL][IL]R, SAG[IL]QA[IL]DE[IL]VPT[IL][IL]R, VGM[IL]NA[IL]EQ[IL]SR, V[IL]PSV[IL]P[IL][IL]SR	6	DLFQTLPLYDDRASRKAVDDMVIRALTECTFMKPFAAALVQSMEKNLKVSSPLACFKLLRWSSYLLKWTQFATLSKGGFSRLANAQAVLSQVLMDGSFRQRRTCKQLFIRLFSESVEIYKMYIEEVRDSRISTRDSPAFINLILGFTIASSSLLSEYKPVFLDLYVKTILSSKDRPPEAASEAFKPLFLDIGHEDFKNVVLPSCIKMLKRNPEIVLQSIRHLLMTVRLDLSNYSMEFMPVVLHQARHSDEERRINALSIVATLSDKSSDPDTLPSMFNAIKAILGGSEGKLSLPYQRVGMLNALEQLSRFSPKQISRLAPSVSSFLLTCYKGDGIEEVKLAALSALGSWASVSSEAVQPDVVSFITAGLKEKDTLRKGHLKLIRVICKKSDSLTKVTSL…	0.986667	0.948333	0.988333	0.996667	0.958333	1.05	1.04, 0.94, 1.01, 0.87, 1.06, 1.0	1.11, 0.97, 1.15, 0.69, 0.86, 0.91	1.22, 0.92, 1.07, 0.77, 0.99, 0.96	1.17, 0.97, 1.06, 0.89, 0.93, 0.96	1.07, 1.03, 1.14, 0.79, 0.81, 0.91	1.1, 0.94, 0.93, 1.12, 1.15, 1.06	0.0287131	0.0691094	0.0615043	0.0416066	0.0586752	0.0382971
p3793	TPM=23.92 TMHMM=10 SignalP=yes Putative ortholog: Os07g05570 ERD4 protein, putative, expressed comp4043_c0_seq1_g902	A[IL]HPDTFYK, DVP[IL]PPPDQS[IL]K, SPVGW[IL]QQAFR, TGF[IL]G[IL][IL]GK, WTVTEAPEPR, [IL]AHAEAVYAESK, [IL]EDVEVFEDAQSR, [IL]FQE[IL]EGHK	8	MDIASFVTSLLTSFLIFVVLVLVFTWLSRRPGNAPVYYPNVLLRGLDPWEGRGRGTRSPVGWIQQAFRASEADVVHAGGVDAAVYLVFLSSVLAILVFSGILLLPVLLPVAATSHALEASAGSNASAAHNFTVIERLALGNVEEKSFKLWAFIGSVYWLSFVTYFVLWKSYKHVSNLRAAARSTSDVKPEEFTVLVRDVPIPPPDQSIKDSVDSYFRALHPDTFYKAMVVTDIKKADKIFQEIEGHKQKIAHAEAVYAESKTANKPEGTKPTHKTGFLGLIGKKVDTIEYCNEKIKELLPKLEEEQKNTLSEKQQRAAIVVFNSRAAAASASQTLHAQMFDKWTVTEAPEPREIIWSNLPMKIYDRNTRRSVIYFIVFLTVFFYLIPISAISAVTTLEK…	0.9525	0.9775	0.95125	1.00125	1.02875	0.97875	0.9, 1.03, 1.01, 0.91, 0.97, 1.02, 0.86, 0.92	0.99, 1.06, 0.95, 1.02, 0.87, 1.04, 0.85, 1.04	0.95, 0.96, 0.98, 0.79, 1.03, 0.94, 0.89, 1.07	1.06, 0.93, 0.96, 0.87, 1.07, 0.92, 1.04, 1.16	1.1, 1.03, 0.94, 1.12, 0.9, 1.02, 0.99, 1.13	0.96, 0.91, 1.02, 0.78, 1.18, 0.9, 1.05, 1.03	0.0225	0.0283945	0.0302039	0.0341968	0.0297872	0.0424027
p13266	TPM=66.99 Putative ortholog: Os03g21950 fumarate hydratase, mitochondrial precursor, putative, expressed comp2506_c0_seq1_g682	A[IL]MQAAEEVAEGK, EFHE[IL]VVPEK, ESA[IL]S[IL]GV[IL]TEK, MYQ[IL]AQGGTAVGTG[IL]NTK, S[IL]QNFD[IL]GGER, [IL]AAAVAEETD[IL]PFVTAENK, [IL][IL]GDASVSFEK	7	PSAAALLLRPALTRPISTGFREERDTFGPIRVPNDKLWGAQTQRSLQNFDIGGERERMPVPIIRAFGVLKKCAAKVNMDYGLDPTIGKAIMQAAEEVAEGKLDDHFPLVIWQTGSGTQSNMNANEVIANRAAEILGHKRGDKFVHPNDHVNRSQSSNDTFPTVMHIAAAVEINSRFIPSLDQLHKSLHSKSDEFKDIIKIGRTHTQDATPLTLGQEFSGYATQVKYGIDRIACTLPRMYQLAQGGTAVGTGLNTKKGFDVKIAAAVAEETDLPFVTAENKFEALAAHDAFVESSGAVNTVSASLMKVANDIRLLGSGPRCGLGELILPENEPGSSIMPGKVNPTQCEALTMVCAQVMGNHVGVTIGGSNGHFELNVYKPMIAAGLLRSLRLLGDASVSF…	0.948571	1.05143	0.98	1.03429	1.11143	0.942857	0.94, 0.99, 0.88, 0.94, 0.92, 1.01, 0.96	1.05, 1.2, 1.2, 0.91, 0.87, 1.06, 1.07	0.92, 1.02, 1.04, 0.92, 1.0, 0.99, 0.97	0.98, 1.03, 1.17, 0.98, 1.09, 0.98, 1.01	1.12, 1.21, 1.36, 0.97, 0.95, 1.05, 1.12	0.88, 0.85, 0.86, 1.01, 1.15, 0.94, 0.91	0.0163923	0.0481777	0.0175933	0.0271554	0.0537821	0.0402205
p10788	TPM=31.25 Putative ortholog: Os01g68380 expressed protein comp3400_c0_seq1_g789	A[IL]PTEAPYGEPPK, M[IL]DN[IL]NS[IL]MSE[IL]AVER	2	MVGLHRDRPRGQAAPARRSTHQTKNKPGKTRKAKPGPKNIWGPSGSANPPSPIPIPNPTPSPDLAPIAAGGGGRWTGRPAVGGDLAEIWVGLVGGAGCVDMASAQASSSSSTAAPSSREASRQAGKKALEEFRKKKKKAAKKATTVVDQAAPAAPSVAENPLPNSNNGIPGEAPVSDLDSSTPSTSSAPSAPYENGPTNSSRSEEFLSNGPVVVNASANVSNAGPLQDATGDGGSKFYGNLSYSDLVNGHHDDWRGDAARERAETSPDKDAPLASESSAFGNTSSGSSSAEVLPNWGGNSSLSQVHGTEQSSSFSSGSLFAKPERTYSQDYSPENDIFGRLRATSKDPSQVEHSAYASNRDYRSNFSSSLVADGVDHDANIGMFRNASDSAPTNFDKQD…	1.025	0.865	0.925	0.91	0.85	1.07	0.9, 1.15	0.82, 0.91	0.86, 0.99	0.96, 0.86	0.91, 0.79	1.05, 1.09	0.125	0.045	0.065	0.05	0.06	0.02
p54182	TPM=94.32 TMHMM=1 BigPI=yes comp860_c0_seq1_g1190	A[IL]QDE[IL]DA[IL]K, DDVATAEHAAAATEAEAAS[IL]R, [IL]EG[IL]FSQAR	3	MAAGDEHARTEAVARVDGLVCDCFDLIITYKREGMTPNLSDSVTTWLRVISASEVQPPSAMVSSNSSRSIFSTLLTPASPAAASENTTLAAEAHRLEGLFSQARDDVATAEHAAAATEAEAASLRAEVARLQALLDRKQADRDDEERQRRELEAEVGTVRQAKRALQDEIDALKASAAAVEDREVAPDVAATKEDGGVAWQGVAAGAAAGAAVTAVVVLVYLRLKR	0.84	0.893333	1.05	1.27333	1.07333	1.20333	0.74, 0.98, 0.8	1.0, 1.0, 0.68	1.14, 1.04, 0.97	1.55, 1.06, 1.21	1.35, 1.02, 0.85	1.14, 1.04, 1.43	0.072111	0.106667	0.0493288	0.144952	0.14678	0.116952
p11469	TPM=141.67 Putative ortholog: Os04g32020 2-oxoglutarate dehydrogenase E1 component, mitochondrial precursor, putative, expressed comp2025_c0_seq4_g930	A[IL]QQDP[IL]NSPF, F[IL]QMSDDNPYV[IL]PEMDPTMR	2	APNAPRAVPLSRLTDSFLDGTSSVYLEELQRAWESDPASVDESWDNFFRNFLGQAAPTSALSGQTIQESMQLLLLVRAYQVNGHMKARLDPLGLDDRAVPDDLDLANYGFTAADLDREFFLGVWRMAGFLSENRPVQTLRSVLGRLEQAYCGTIGYEYMHIADRDKCNWLRERIETVNPREYAYDRRQVMLDRLIWSTQFENFLAQKWTTAKRFGLEGAETLIPGMKEMFDRAADMGVESIVIGMPHRGRLNVLGNVVRKPLRQIFSEFSGGTKPVNEGEGLYTGTGDVKYHLGTSYDRPTRGGKHIHLSLVANPSHLEAVDPVVAGKTRAKQYYSNDLDRTKNLGVLLHGDGSFSGQGVVYETLHLSALPNYTTGGTIHLVVNNQVAFTTDPMSGRSS…	0.895	0.66	0.935	1.06	0.74	1.43	0.83, 0.96	0.63, 0.69	1.04, 0.83	1.26, 0.86	0.76, 0.72	1.66, 1.2	0.065	0.03	0.105	0.2	0.02	0.23
p18628	TPM=36.69 Putative ortholog: Os10g34370 expressed protein comp7893_c0_seq2_g988	A[IL]S[IL]FPSPDDA[IL]R, P[IL]FS[IL]AAAR	2	MASLLRRRHTHPSTAAVSAHLLRRFSALPDLDPSPAPASASIPAPTLAAPAAPRASIIDLQLAVRAATDPDRLHALVASALSSPDYHRLHTSRPLFSLAAARLARFHRPDLTASLLDQLLASAPPTPGILARALSLFPSPDDAIRAFSSSPPAARSDVSLSALLSALLRAGRLDELKSTFKSAESALGVAPGRASHNVLLHALVKTSDHAAARKLLNEMAKKKFKHRPAPDIISYNTILAGFSAKDAAAEEEFEKLLKEISENKLEPNITTYNCRVQWLAKKEETFRGEELLDVMESKGVLPNYVTYHALVQGYCKEGNVGAAMRVFKKMKVMKRREGRSDLRVSVHALTYMVLFR	1.055	0.935	0.945	0.895	0.885	1.01	1.01, 1.1	0.9, 0.97	0.91, 0.98	0.9, 0.89	0.89, 0.88	1.02, 1.0	0.045	0.035	0.035	0.005	0.005	0.01
p70562	TPM=34.69 comp5684_c0_seq1_g348	A[IL]S[IL]VDSQVK, E[IL]QD[IL][IL]ED[IL]YVR, MEYAEENPEGP[IL]R, N[IL]PATAQVAAQQGQY[IL]AK, VMED[IL]SE[IL]FR	5	AECFKIDPAKKKIHCRSNTGTNFDGNGEFLVDYDYLVVAVGARSNTFNTPGVEENCHFLKEVEDAQKIRRSVMDCFEKASLPYLNEEERKKNLHFVIVGGGPTGVEFAAELHDFVTEDLSKLYPSVQHLVKISLIEAADHILTMFDKRITNFAEDKFGRNGIDVKTGYKVVKVAKDAITMQNPATGDVAVPYGMAVWSTGIGTRPFVVDFMKQIGQANRRVLATDEWLRVRECDDVYAVGDCATINQRRVMEDISEIFRVADKDKSGTLTVKEIQDILEDIYVRYPQVKLYMKSKQMNGIADLVKAGNGDTEKQSVELSIEEFKKALSLVDSQVKNLPATAQVAAQQGQYLAKCFNKMEYAEENPEGPIRIRGEGRHRFLPFRYRHLGQFAPLGGEQTA…	0.976	0.95	1.022	1.054	0.978	1.104	0.87, 1.07, 1.03, 1.01, 0.9	0.94, 1.09, 0.7, 1.07, 0.95	1.04, 1.05, 1.02, 1.06, 0.94	1.19, 0.98, 1.0, 1.06, 1.04	1.08, 1.01, 0.69, 1.06, 1.05	1.11, 0.97, 1.45, 1.0, 0.99	0.0386782	0.0694982	0.0215407	0.0368239	0.0728972	0.0898666
p8997	TPM=59.14 Putative ortholog: Os03g50540 2Fe-2S iron-sulfur cluster binding domain containing protein, expressed comp1551_c0_seq1_g1204	A[IL]SEVAGAP[IL]PYDSVAGVR, FASEVAGVQD[IL]GM[IL]GR, GTET[IL]DVTDAVGSN[IL]R, [IL]SMVAPN[IL]VHVDER	4	REPVGGARVELPANPEDVLEVFVDGHAVKIPKGFSVLQACEVAGVDIPRFCYHSRLSIAGNCRMCLVEVEKSPKPVASCAMPALPGMKIKTNTPIAKKAREGVMEFLLMNHPLDCPICDQGGECDLQDQSMAFGADRGRFTDMKRSVVDKNLGPLVKTVMTRCIQCTRCVRFASEVAGVQDLGMLGRGSGEEIGTYVEKLMTSELSGNVIDICPVGALTSKPFAFKARNWELKGTETIDVTDAVGSNIRVDSRGPEVMRIVPRINEDINEEWISDKTRFCYDGLKRQRLNDPMIRGSDGRFKAVTWRDAIAVVAEVLNQVKPEQITGVAGKLSDAESMMALKDFVNKMGSDKVLCEGNGPNPPADLRSNYLMNTSIAGLEKADVFLLVGTQPRVEAAIV…	1.0775	0.9475	1.0325	0.9575	0.885	1.1	1.01, 1.1, 1.24, 0.96	0.78, 0.97, 1.01, 1.03	0.95, 1.1, 1.18, 0.9	0.94, 1.0, 0.95, 0.94	0.77, 0.88, 0.81, 1.08	1.23, 1.13, 1.17, 0.87	0.0614241	0.0572094	0.064984	0.0143614	0.0688598	0.0793725
p9839	TPM=129.39 Putative ortholog: Os01g70170 transaldolase, putative, expressed comp1361_c0_seq1_g1633	A[IL]STSSAYDDQFK, SFDS[IL][IL]TS[IL]TEK, T[IL]DANVSEAEG[IL]YSA[IL]EK	3	GTVPFLAAAPLPSQPLRSAALAFAPSARRFRVSVSGRARSPVIAMASGKEGNGAATKRTTLHDLYDLQGQSPWYDNLCRPVTDLLPYIANGVRGVTSNPTIFEKAISTSSAYDDQFKQLISAGKDAESAYWELVIKDIQDACKLFEPIYDETDGADGYVSVEVSPRLANETQGTVEAAKWLHKVVNRPNVYIKIPATAECVPSIQEVIANGISVNVTLIFSVARYEAVIDAYIAGLESSGLSDLSRVTSVASFFVSRVDSLIDKNLEKIGTPEALALRGKAAVAQAKLANQLYLKKFSGPRWEALVKKGAKKQRLLWASTSVKNPAYSDTLYVDPLIGPDTVSTMPDQALSAFLDHGTVARTIDANVSEAEGIYSALEKLGISWEEVGKQLEHEGVTSF…	0.956667	1	0.98	1.02667	1.04	0.99	1.0, 0.92, 0.95	1.05, 1.0, 0.95	0.88, 0.99, 1.07	0.88, 1.07, 1.13	1.04, 1.09, 0.99	0.84, 0.99, 1.14	0.0233333	0.0288675	0.0550757	0.075351	0.0288675	0.0866025
p898	TPM=92.38 SignalP=yes Putative ortholog: Os04g48490 fasciclin-like arabinogalactan protein, putative, expressed comp1329_c0_seq1_g373	A[IL]T[IL]FAPTDDAFHAK, FAA[IL]VVSSGV[IL]K, [IL][IL]T[IL][IL]DYYDPK	3	MAAAYRLLFLLAVSLAAVSAARAHNITAILEGYSEYSLYNSYLSQTKVCDEINGRSTVTSLVLTNGAMSSLVSNLSLADVKNALRLLTLLDYYDPKKLHSLHGGSELTTTLYQTTGDASGDMGHVNITNLRGGKVGFASAQPGAKFQATYTKSVKEEPYNLSVLEVSDPITFPGLFTAASAASTNLTALLEKAGCKRFAALVVSSGVIKTYQAAMDKALTLFAPTDDAFHAKGLPDLAKLTAADLVTLLEYHALPQYAPKASLKTIRGGIPTLASTGKGKYDLSVVARGDDVSMDTGMDKSRVASTVLDDTPVAVHTVDSVLLPPELFGGAPSPAPAGASADTPASAPAPEAASAAAPAPTKQHEKKKPKGKSHSPPAPPADSPDMAPADAPDGDEADK…	0.996667	1.03667	0.95	0.953333	1.04	0.92	0.96, 1.06, 0.97	1.03, 1.04, 1.04	0.81, 1.09, 0.95	0.84, 1.03, 0.99	1.07, 0.98, 1.07	0.79, 1.05, 0.92	0.031798	0.00333333	0.080829	0.0578312	0.03	0.0750555
p55327	TPM=396.01 comp413_c0_seq1_g14	A[IL]VDAADMVR, [IL]S[IL]TD[IL]K	2	NYGKDYGRLVVIVDVVDQNRALVDAADMVRCQMNFKRLSLTDIKVDIKRIPKKATLIKALEEADVKNKWENSSWGKKLIVQKRRASLNDFDRFKVMLAKIKRGGAIRQELSKLKKEVAAA	0.95	1.09	0.985	1.045	1.145	0.925	0.89, 1.01	0.94, 1.24	0.98, 0.99	1.11, 0.98	1.06, 1.23	1.05, 0.8	0.06	0.15	0.005	0.065	0.085	0.125
p7480	TPM=430.13 Putative ortholog: Os02g40880 ribosomal protein L14, putative, expressed comp221_c0_seq1_g1078	A[IL]VDAPDMVR, [IL]T[IL]TD[IL]K	2	LYNPLPPPNPSSSCLSASSHPPRRRRPLTRRRVFSPTAAKMPFKRFVEIGRVALVNYGKDYGRLVVIVDVVDQNRALVDAPDMVRCQINFKRLTLTDIKIDIKRVPKKATLIKAMEEAEVKTKWENSSWGKKLIVQKRRASLNDFDRFKVMLAKIKRGGAIRQELAKLKKEVAA	0.9	1.025	0.995	1.11	1.135	0.96	0.91, 0.89	0.94, 1.11	0.78, 1.21	0.86, 1.36	1.03, 1.24	0.83, 1.09	0.01	0.085	0.215	0.25	0.105	0.13
p15239	TPM=24.98 Putative ortholog: Os03g12590 coatomer subunit gamma-1, putative, expressed comp4180_c0_seq1_g1452	A[IL]VDS[IL]VT[IL][IL]SA[IL]PDAK, FGA[IL]VDE[IL]KPR, TYEPSEEPFD[IL]S[IL]VSR	3	EVPIPHRTVLPPASTSPTAARPSLRRIRATQSIEDAESTHHSTNAAGCGQSVPRSDRRMPRSLAGDLTDPEMAQPYMKKDDDDSDIEYSPFFGIEKGAVLQEARVFNDPQLDARKCSQVITKLLYLLNQGETFTKVEATGVFFAVTKLFQSNDAGLRRLVYLMIKELSPSSDEVFIVTSSLMKDMNSKTDMYRANAIRVLCRIIDGNLLTQIERYLKQAIVDRNPVVASAALVSGIHLFQANPEIVKRWSNEVQEAVQSRAALVQFHGLALLHQTRQNDRLAISKLVSSLTKGSVRSPLAQCLLIRYTSQVIRESMNTQNGDRPFFDYLESCLRHKSEMVILEAARKITEMDVTSRELAPAITVLQLFLSSSKPVLRFAAVRTLNKVALTRPLAVTNCN…	0.966667	0.993333	0.966667	1.00667	1.04	0.986667	0.94, 0.94, 1.02	1.12, 1.05, 0.81	0.95, 1.03, 0.92	1.02, 1.1, 0.9	1.2, 1.12, 0.8	0.85, 0.98, 1.13	0.0266667	0.0938675	0.0328295	0.0581187	0.122202	0.0808977
p46664	TPM=60.51 TMHMM=3 SignalP=yes comp2522_c0_seq2_g283	A[IL]VP[IL][IL]YTVR, [IL]DDDAAATHSAASQE[IL]FR	2	MSGISLAVGPRSGPDNGASRQPPATMLGGVMGSLRVIELQLVAFIMVFSMSGLVPLLDLAFPVFTTLYLLVLSRLAFPSLHHKLDDDAAATHSAASQEIFRGSTLFQVYVVIGTTVGLFLPLAHVLGGFARGDDAAVRSATPHLFLLSCQILTENIIGSLGIFSPPLRALVPLLYTVRRVFVIVDWVYDVWTNKLVTRTAPVQDKAWVWFGRYLAVANLVYFSINLFIFLIPKFLPRAFETYFHTRDEVYAKTAEDKRSRDMSSVDDDGATKSNVSKKAD	0.985	1.005	0.985	1.005	1.02	0.985	1.03, 0.94	1.06, 0.95	1.02, 0.95	1.0, 1.01	1.03, 1.01	0.97, 1.0	0.045	0.055	0.035	0.005	0.01	0.015
p14010	TPM=40.05 Putative ortholog: Os07g40800 PPR repeat domain containing protein, putative, expressed comp2564_c1_seq1_g1055	AA[IL]AV[IL]DEMVDAGFTPTK, AG[IL]MAGAAPHEM[IL]D[IL]ADQMR, AYETFEAMK	3	PTSGSPFYADNWRNPASASSNLPALINPAPLSENHLLAATLGAADLKERFAEWTAEQKWDDLRQVFEFWVRSLDAATGKPNRPDADLFNHYLRAGLMAGAAPHEMLDLADQMREFKITPNTASFNLVLKSMVQAREVEGGERLVDRMLQTGIVPDDETYNLVVDLLIKGSRVDSAFKYLDIMLKSGYAISSPVYAEYVGVCVRSGRLDTLAYIIEKCKGTDKNKILCPQWAWCVDIAEAAFEANNSKLAMFGLEFLARWMARGERATPPDHLSVDEGLVLSALCAAGRTCSTDLLNAAWSILRKSLRQKRAPMPETYLAKIYAHSSIGQLQRAFGTLREFENAYGNSANIDTELFSPFTSLKPLVVACCKDGFTTLDTVYVQLENLSSADPPYKSVAAL…	0.966667	1.05667	0.973333	1.00667	1.09333	0.923333	0.97, 0.97, 0.96	1.13, 0.98, 1.06	0.93, 0.93, 1.06	0.95, 0.96, 1.11	1.16, 1.01, 1.11	0.82, 0.95, 1.0	0.00333333	0.0433333	0.0433333	0.0517472	0.0440959	0.0536449
p7849	TPM=44.02 Putative ortholog: Os02g06360 uncharacterized protein CPn_0526/CP_0226/CPj0526/CpB0547, putative, expressed comp1975_c0_seq1_g193	AA[IL]S[IL]SP[IL][IL]PVFSK, NGSVM[IL]TFFPAVGQR, VERPNPDSEWDR	3	PISGPINAVGSSRDERRLLCLSPALHSTGDSGATIDGRAAATMLRLSRFLPSTTRRVSDLKEVLWSGSLTFEHALSTSAANYDENASARKFASYTVFKGKAALSISPILPVFSKLESGASRVNRNGSVMLTFFPAVGQRKYDYAKKQLFALSPTEVGSLISLGPAESCEFFHDPSMKSSNEGQVKKTLSITPLGSDNGYFLNISVMNNGQKTNERMSVPITKAEFAVMRTALSFALPHIMGWDQALTSHPQSPSSAPASRPRVERPNPDSEWDRFYGIEGTGVRTKHHQTFICFYSDEMLSQELLQCNLSDDQAGVKNQKKTGKNCTGEGGDSIFSMASTAIASAVIVLGFLLHISPTVRLKIAGPLALSLILFLHNILNLEDECLSDLSCGVVGRVLV…	1.02	0.973333	0.95	0.933333	0.96	0.993333	0.97, 1.07, 1.02	1.14, 0.88, 0.9	0.89, 0.91, 1.05	0.92, 0.85, 1.03	1.18, 0.82, 0.88	0.78, 1.03, 1.17	0.0288675	0.0835331	0.0503322	0.0523874	0.111355	0.114066
p8245	TPM=111.65 Putative ortholog: Os02g13840 citrate synthase, putative, expressed comp960_c0_seq1_g1034	AA[IL]SDEYF[IL]K, TYDPGY[IL]NTAPVR, VPSSDSEQ[IL]GQ[IL]ATSNATR, [IL]AEEVFT[IL]VGR	4	MDRADPARGRLAVLSSHLLGAGADRAAVLERSPVSAVAPAARPGVLAVVDSRTGKRYEVKVSEDGTVRATDFKKITTGKDDKGLKTYDPGYLNTAPVRSSICYIDGDEGILRYRGYPIEEVAESSSFVEVAYLLMYGNLPTQSQLAGWEFAISQHSAVPQGLLDIIQSMPHDAHPMGVLASAMSTLSVFHPDANPALRGQDLYKSKQVRDKQIVRVLGKAPVIAAAAYLRLAGRPFVLPSNNLSYSENFLYMLDSMGNKDYKPNPRLARVLDVLFILHAEHEMNCSTAAVRHLASSGVDVFTALSGAVGALYGPLHGGANEAVLKMLNEIGSVENIPEFIEGVKNRKRKMSGFGHRVYKNYDPRAKVIRKLAEEVFTIVGRDPLIEVAVALEKAALSDE…	0.995	0.9825	1.05	1.055	1	1.0825	0.98, 1.01, 1.13, 0.86	1.13, 0.97, 0.87, 0.96	0.94, 1.04, 1.22, 1.0	0.96, 1.03, 1.07, 1.16	1.16, 0.96, 0.77, 1.11	0.83, 1.07, 1.39, 1.04	0.0554527	0.054064	0.0602771	0.0417333	0.0876546	0.115569
p6528	TPM=243.23 Putative ortholog: Os03g53910 tetratricopeptide repeat domain containing protein, expressed comp267_c0_seq1_g518	AAAAVASGVPPGAGGTEEASR, A[IL]SWA[IL]DHVVR, VVAAVDASEES[IL]R	3	MRDEYIILSWDERVHRKRNRPGITSLGTTVRMDKLWIRGGKAGQANRGLGLEHLHTRNGARKPDKMHRRREHARRAFDELAELRNKSHRAVIARHEAGLTTDSERVAMEEERAAAAVASGVPPGAGGTEEASRGTAAATTMKVVAAVDASEESLRALSWALDHVVRQNPGASVVVVHAQHRAEHFVYPVAAHGLAYAPPMAVDSMKKTQEENARRVVARALDVCAQRQVTTAKAAVVEGDPKEAICQAVEDMHADLLVLGSRGLGMIKRALLGSVSDYLAHHASCPVLIVKPPKAHPKGAGSST	0.8	0.936667	0.873333	1.08667	1.21	0.926667	0.6, 0.95, 0.85	0.89, 0.89, 1.03	0.61, 0.95, 1.06	1.01, 1.0, 1.25	1.49, 0.93, 1.21	0.68, 1.07, 1.03	0.104083	0.0466667	0.135442	0.0817177	0.161658	0.123873
p5600	TPM=149.77 TMHMM=7 Putative ortholog: Os09g12600 phosphate/phosphate translocator, putative, expressed comp792_c0_seq1_g938	AAAEEPAEEGGAA[IL]GK, VAVSFTHT[IL]K, VSPVTHSVGNCVK, VTPTF[IL]QTAG[IL]N[IL]QQVYTR	4	DLVAGLGRIGLVPASPDHERRTVAAAASAASSGKAAAEEPAEEGGAALGKTLQLGVFFGLWYLFNIYFNIYNKQVLKVFPYPINITTVQFAVGTVISLFLWITGILKRPKISGAQLLAILPLAIVHTMGNLFTNMSLGKVAVSFTHTIKAMEPFFSVLLSAMFLGELPTPWVILSLLPIVGGVALASISEASFNWAGFLAAMASNVTFQSRNVLSKKLMLKKEASLDNINLFSIITVMSFFLLAPVTLLTEGVKVTPTFLQTAGLNLQQVYTRSLIAAFCFHAYQQVSYMILARVSPVTHSVGNCVKRVVVIVTSVLFFKTPVSPINSIGTAIALAGVFLYSQLKRLQPKPKAA	0.98	0.98	1.02	1.04	1	1.0575	1.0, 0.95, 0.94, 1.03	1.16, 0.84, 0.92, 1.0	1.0, 1.02, 1.07, 0.99	1.0, 1.07, 1.13, 0.96	1.16, 0.89, 0.98, 0.97	0.86, 1.21, 1.16, 1.0	0.0212132	0.068313	0.0177951	0.0376386	0.0570088	0.0796215
p16948	TPM=42.17 Putative ortholog: Os08g12840 FabA-like domain containing protein, expressed comp4192_c0_seq1_g1038	AAAGDNAEEE[IL]P[IL]EK, [IL]AAYPTVMD[IL]NQ[IL]R	2	AFPRASPRQRLVARRAAAGDNAEEELPIEKRIAAYPTVMDINQIREILPHRFPFLLVDRVIEYKAGEYAVAIKNVTINDNFFPGHFPERPIMPGVLMVEAMAQVGGIVMLQPEVGGSQDNFFFAGVDKVRFRKPVIAGDTLVMRMTLTKYQKRFGLAKMEGKAYVGGDVVCEGEFLLISATG	1.015	0.955	0.96	0.95	0.94	1.015	1.01, 1.02	0.97, 0.94	0.89, 1.03	0.89, 1.01	0.96, 0.92	0.93, 1.1	0.005	0.015	0.07	0.06	0.02	0.085
p7506	TPM=220.05 Putative ortholog: Os08g30060 proton pump interactor, putative, expressed comp418_c0_seq1_g1147	AAAVADDVYEAEPAK, AESAG[IL]CSS[IL]EE[IL]EQE[IL]K, SDEAAETQAEED[IL]APVSVTVK, SEVEE[IL]QE[IL]QK, VADAEVP[IL]FQDTESK, [IL]AHES[IL]PFDEEK, [IL]EQADKDFQNK	7	ICPLRHHRAARSQGGPGRITPPRRPFPRDMGMEVESAPVQVKVADAEVPLFQDTESKATAKEREEAAVFGADNGKVAANATNDLAPPKDAVEDWPEPKQTYTFYFVKIRSFEDPKLRAKLEQADKDFQNKIQARSKIFEAIKAKKTERSAIIAELKPLSAENRQYNEAFNVKLKEIEPFRNRLGKFRDENNSMRAESAGLCSSLEELEQEIKRLEHRIAHESIPFDEEKRLIKEIKNLEKTRPKVSSNAAKRAKLQDTVVERDAIQDQVKIIGEGLDGVKKDRQEVRSKIKVLEDELKVVDAEYQALQEDLDAATARKDKAYDSLNELRKARDANNASFYQNRNVLNRAREHSSRSEVEELQELQKTEVEKFMTEWCGSKAFREDYEKRTLTSLNGRQL…	0.991429	1.10714	1.01286	1.02	1.11714	0.934286	1.0, 1.07, 0.98, 0.89, 1.02, 0.98, 1.0	1.15, 1.26, 0.99, 1.13, 1.12, 0.81, 1.29	1.14, 0.94, 1.04, 0.89, 1.03, 0.97, 1.08	1.14, 0.88, 1.05, 1.0, 1.0, 1.0, 1.07	1.16, 1.18, 1.0, 1.27, 1.09, 0.83, 1.29	0.99, 0.75, 1.05, 0.79, 0.92, 1.21, 0.83	0.0205204	0.0619798	0.0323459	0.0303158	0.0609338	0.0614064
p7909	TPM=113.84 Putative ortholog: Os08g18110 alpha-soluble NSF attachment protein, putative, expressed comp1108_c0_seq1_g291	AAD[IL]FDSEGQTSQSNT[IL]K, ADPVA[IL]QNS[IL]ER, ATE[IL]FEA[IL]AR, D[IL]GE[IL]YQQEQD[IL]EK, VAE[IL]AAQ[IL]EQYPK, YQE[IL]DPTFSGTR, [IL]SGWGFFGSK	7	QRAAQAETPRAAFPFPSPLSSPFAFSSPPSNKQILVRSPATFPAAAMGDHEARGDDMEKKAEKKISGWGFFGSKYEDAADLYDKAANFFKLSKNWNRAASVYIKIANCHLKGDSKHEAASAYVEAANCYKKFSPQEAAQALDQAVNLFMEIGRLSMAARYCKDIGEIYQQEQDLEKASDYLERAADLFDSEGQTSQSNTIKQKVAEIAAQLEQYPKATEIFEAIARQSINNNLLKYSVRGILLNAGICQLCRADPVAIQNSLERYQEIDPTFSGTREYKLLADLAASMDDGDVAKFTDAIKDFDGMTRLDPWKTTLLLRAKNELKKQEDDDDDLT	1.01	1.01143	1.03286	1.02286	1.00286	1.02571	1.09, 0.95, 1.12, 0.93, 1.06, 0.98, 0.94	1.04, 0.93, 1.08, 1.04, 1.07, 0.92, 1.0	1.08, 1.02, 1.13, 1.0, 1.04, 1.05, 0.91	0.99, 1.07, 1.01, 1.07, 0.98, 1.07, 0.97	0.95, 0.98, 0.96, 1.12, 1.01, 0.94, 1.06	1.04, 1.1, 1.05, 0.96, 0.97, 1.14, 0.92	0.0296005	0.0243417	0.0259775	0.0172812	0.0249489	0.030068
p8230	TPM=123.48 Putative ortholog: Os01g43520 neutral ceramidase precursor, putative, expressed comp611_c0_seq1_g1020	AAD[IL]FNSASEE[IL]QGK, EPYDWAPS[IL][IL]P[IL]Q[IL][IL]R, SFAT[IL]EWT[IL]PEDAASGVYR, SPSAY[IL]NNPAEER	4	MEGLRHQFHGFGSSRTWLCLLLVLVLQNCGRVLSDSPYLVGMGSYDITGPAADVNMMGYANTEQIASGIHFRLKSRAFIVAEPDGKRVVFVNLDACMASQLVNIKVLERLKARYGDLYNENNVAISGIHTHAGPGGYLQYVVYIVTSLGFVRQSFDVIVDGIEQSIVEAHNNLRSGKIYVNNGDLLDAGVNRSPSAYLNNPAEERSKYQYNVDKQMTLVKFVDDEMGPVGSFNWFATHGTSMSRTNSLISGDNKGAAARFMEDWAEQNGVSKQTGHANSVDFGSLHMSSVLPRRVSTIIPEPNEITDDLMQLASSYGASGGRRLAASNITRRIRSTQENTAKFVSAFCQSNCGDVSPNVLGTFCIDTHLPCDFNHSTCNGKNELCYGRGPGYPDEFEST…	0.9075	0.9225	0.975	1.08	1.02	1.065	0.94, 0.82, 0.91, 0.96	1.02, 0.91, 0.83, 0.93	0.94, 1.03, 0.95, 0.98	1.0, 1.25, 1.04, 1.03	1.09, 1.11, 0.91, 0.97	0.92, 1.13, 1.15, 1.06	0.0309233	0.0390246	0.0202073	0.0573004	0.0479583	0.0520416
p11518	TPM=141.67 Putative ortholog: Os07g49520 2-oxoglutarate dehydrogenase E1 component, mitochondrial precursor, putative, expressed comp2025_c0_seq1_g1067	AAD[IL]GVNN[IL]V[IL]GMPHR, AVNVP[IL]FHVNGDD[IL]EAVVR, DW[IL]AAYWTGFK, FG[IL]EGGET[IL][IL]PGMK, PVEGEDG[IL]YTGTGDVK, [IL][IL]NEEFAK, [IL][IL]WSTQFENF[IL]ATK	7	APNAPRAVPLSRLTDSFLDGTSSVYLEELQRAWESDPASVDESWDNFFRNFLGQAAPTSALSGQTIQESMQLLLLVRAYQVNGHMKARLDPLGLDDRAVPDDLDLANYGFTAADLDREFFLGVWRMAGFLSENRPVQTLRSVLGRLEQAYCGTIGYEYMHIADRDKCNWLRERIETVNPREYAYDRRQVMLDRLIWSTQFENFLATKWATAKRFGLEGGETLIPGMKEMFDRAADLGVNNIVIGMPHRGRLNVLGNVVRKPLSQIFSEFAGGTRPVEGEDGLYTGTGDVKYHLGTSYDRPTRGGKRIHLSLVANPSHLEAVDPVVVGKTRAKQFYSDDADRTKNMGILIHGDGSFAGQGIVYETLHLSALPNYTTGGTIHIVVNNQVAFTTDPRAGRSS…	0.961429	1.02286	0.977143	1.01857	1.06571	0.975714	1.03, 1.02, 1.04, 0.98, 0.91, 0.84, 0.91	0.8, 0.93, 1.38, 1.04, 1.05, 1.01, 0.95	0.95, 1.03, 1.1, 0.9, 0.98, 0.93, 0.95	0.92, 1.02, 1.06, 0.92, 1.07, 1.1, 1.04	0.77, 0.91, 1.33, 1.06, 1.15, 1.2, 1.04	1.2, 1.11, 0.8, 0.87, 0.93, 0.92, 1.0	0.0287376	0.0676727	0.0256082	0.0271178	0.0702667	0.0525926
p42957	TPM=29.58 TMHMM=15 comp1548_c0_seq1_g923	AADE[IL]QDEDPTVAR, EH[IL]VH[IL][IL]ANEQSR, ESAVFSGN[IL]GE[IL]ER, N[IL][IL]EEFSQDHGK	4	SSARARSGRAETLAPSARGRRSQHSSLVVVCGPGSERWWRARGSERRALPPPPSKMARAEANWERLVRAALRGERMGGGYGVPASGIAGNVPTSLGNNTHIDEVLRAADEIQDEDPTVARILCEHAYALAQNLDPNSEGRGVLQFKTGLMSVIRQKLAKREGGAIDRSQDIAKLQEFYKLYREKHKVDELCEDEMKLRESAVFSGNLGELERKTLKRKKVLATLKVLWSVIEDITREISPEDADKLISPEMKKVMQKDAARTEDVVAYNIIPLDAVSTTNAIVTFPEVRAAISALQYHRDLPRLPGNISVPDARNSDMLDLLHSVFGFQKGNVSNQREHIVHLLANEQSRLGKLSGNEPKIDEGAVHVVFSKSLDNYMKWCSYLPLRPVWNNAESLTKE…	1.0525	1.0325	0.96	0.92	0.99	0.93	1.19, 1.0, 1.04, 0.98	1.01, 1.03, 1.02, 1.07	0.95, 1.03, 0.89, 0.97	0.79, 1.04, 0.86, 0.99	0.85, 1.04, 0.98, 1.09	0.94, 1.0, 0.87, 0.91	0.0475	0.0131498	0.0288675	0.0575905	0.0518009	0.0273861
p8347	TPM=156.63 Putative ortholog: Os06g50300 heat shock protein, putative, expressed comp1035_c0_seq1_g1335	AADEEPEYEQYDKDE[IL], ADGSFA[IL]SEDTWNEP[IL]GR, A[IL]DTEG[IL]DSVK, ETTTEWE[IL][IL]NDMK, E[IL][IL]SNASDA[IL]DK, SPF[IL]EQ[IL]TK, YGWSSNMEK, [IL]GAVPHG[IL]STDSEVVQR, [IL]G[IL][IL]EDATNR, [IL]VYQTA[IL]MESGFN[IL]PDPK	10	RFTPLNATTDAGQFCCSGVKRSGAGTGTMRKWALSCALLLVLLLTTLPDPAKRLQVNAEESSDELADLPKVEEKLGAVPHGLSTDSEVVQRESESISRKTLRNSAEKFEFQAEVSRLMDIIINSLYSNKDIFLRELISNASDALDKIRFLALTDKDVLGEGDAAKLEIQIKLDKENKILSIRDRGVGMTKEDLIKNLGTIAKSGTSAFVEKMQTGGDLNLIGQFGVGFYSVYLVADYVEVVSKHNDDKQYVWESKADGSFAISEDTWNEPLGRGTEIKLHLREEAKEYLEEGKLKDLVKKYSEFINFPIYLWATKEVDVEVPADEEESTEEEDTTTETPEEEETEDGEEKKPKTKTVKETTTEWELLNDMKAVWLRNPKEVTEEEYAKFYHSLAKDFGD…	1.036	1.057	0.979	0.946	1.021	0.93	1.1, 1.08, 1.0, 1.06, 1.1, 1.06, 0.89, 0.94, 1.02, 1.11	1.05, 1.05, 1.07, 1.18, 1.21, 1.1, 0.95, 0.89, 1.0, 1.07	1.05, 1.03, 1.05, 0.94, 1.02, 0.95, 0.87, 0.93, 0.95, 1.0	0.95, 0.95, 1.05, 0.89, 0.92, 0.9, 0.98, 0.99, 0.93, 0.9	0.95, 0.98, 1.07, 1.12, 1.1, 1.04, 1.06, 0.95, 0.98, 0.96	1.0, 0.97, 0.98, 0.79, 0.84, 0.86, 0.92, 1.05, 0.95, 0.94	0.0232952	0.030443	0.0189414	0.0157198	0.0204097	0.0250777
p48594	TPM=36.05 SignalP=yes comp3423_c0_seq1_g1049	AADPA[IL]SAVAVPTNEQ[IL]SDA[IL]K, TPEGASA[IL]TED[IL]R	2	MAEVKRTFQTPAPTDGDYAANLPEGDDARFVYYAGWVLTTYHFAAALFQPGTYRLEGYTDKDFAARLRYFKGKDVNVIETIVAVGIRRNFFTAADSATFENFANFLEFLKTPEGASAITEDLRRARFLAAGKGVFTAVDIAAVSQLTVQAADLEQHKARMIAASQKRIDELELAIAKEKESLETKLALSKDEFFPASIYKKPNAMKLQKECLIKAKAADPALSAVAVPTNEQISDALKQFREEVERQDMVTFLNQQDRLHRLREYVGKKILSFRACGKRKISDRLVHVLAAMDGQLADEIPAFGAGGGDDNDSDGDDYVPEYELEDQEESSGDPEGAGDEQAEDPPIISPIQTRRQRAARSGRGASATGRGATSRATRARRA	0.985	0.88	1.035	1.04	0.895	1.17	0.94, 1.03	0.85, 0.91	0.97, 1.1	1.02, 1.06	0.91, 0.88	1.13, 1.21	0.045	0.03	0.065	0.02	0.015	0.04
p8604	TPM=86.45 Putative ortholog: Os05g28280 peptidase, M24 family protein, putative, expressed comp1582_c0_seq1_g455	AADV[IL]AAANTAAEVAMR, GDNF[IL]TEQTGNVYK, [IL]VEGV[IL]SHQ[IL]K	3	MSSDEEVREEKELDLSSNEVVTKYKTAAEIINKALKLVLAECKPKAKIVDICEKGDNFITEQTGNVYKNVKRKIERGIAFPTCLSVNNTVCHFSPLATDDTVLQENDMVKIDMGCHIDGFIAVVAHTHVIKDGPVAGRAADVLAAANTAAEVAMRLVRPGKKNKDVTEAIQKVAAAYDCKIVEGVLSHQLKQFVIDGNKVVLSVSNADTKVDDAEFEENEVYAIDIVTSTGEGKPKLLDEKQTTIYKRAVDKNYHLKMKASRFIFSEISQKFPIMPFTARALEEKRARLGLVECMNHELLQPYPVLHEKQGDLVAHIKFTVLLMPNGSDKVTSHSLQELKPTISIEDNAEIKGWLALGTKSKKKGGGKKKKGKKGDAAEAEPMDVSEQSQE	1.05667	1.12667	0.976667	0.923333	1.07333	0.876667	1.17, 1.05, 0.95	1.05, 1.28, 1.05	1.07, 0.97, 0.89	0.92, 0.92, 0.93	0.9, 1.22, 1.1	1.02, 0.76, 0.85	0.0635959	0.0766667	0.0520683	0.00333333	0.0933333	0.0762306
p5932	TPM=159.04 TMHMM=1 SignalP=yes Putative ortholog: Os09g32526 peptidyl-prolyl cis-trans isomerase, FKBP-type, putative, expressed comp877_c0_seq1_g77	AADVSE[IL]Q[IL]GVK, GDP[IL]EFE[IL]GTGQV[IL]K, SDEAEDVGSE[IL], [IL]TDGTVFDSSYER	4	MAKPQLLLCVLVVAAALLLVASAKKAADVSELQIGVKFKPVSCSFSAHKGDRVKVHYRGKLTDGTVFDSSYERGDPIEFELGTGQVIKGWDQGILGMCVGEKRKLKIPSKLGYGESGSPPTIPGGATLIFDTELVSVNGEPSSKSDEAEDVGSEL	0.97	0.97	1.025	1.065	1.015	1.0625	0.97, 0.86, 1.11, 0.94	1.12, 1.0, 0.85, 0.91	1.1, 1.04, 0.99, 0.97	1.13, 1.21, 0.89, 1.03	1.16, 1.16, 0.77, 0.97	0.98, 1.05, 1.16, 1.06	0.0521217	0.0587367	0.0290115	0.0689807	0.0931397	0.0370529
p11870	TPM=33.8 Putative ortholog: Os01g62500 OsFtsH3 FtsH protease, homologue of AtFtsH3/10, expressed comp3540_c0_seq1_g305	AAE[IL]TNYD[IL]FK, MQSGFN[IL]GGGPGGK, TDETQ[IL]TMQHFESA[IL]DR	3	GPLGFVRGYLTASLGSPAAAGSASRTSDWRYLLASPQFRRLFSSGSKKNYENYFPKGKKEAPKGEGSNKDSKQESNTDDQWSFQDGTWKQIQNILGPLLLLGLMLSSLSSGSSDQKEISFQEFKNKLLEPGLVERIVVTNKTVAKVYVRSTPQANVEGQKTTDIATSDAPGRQVPGKYKYFFNIGSVDSFEEKLEEAQETLGIDSHDYVPVTYVAEVNWFQEIMRFAPTAFLVGLLYLMGKRMQSGFNIGGGPGGKGSRGIFNIGKATVTKMDKNTKNKVYFKDVAGCDEAKQEIMEFVHFLKNPKKYEELGAKIPKGALLVGPPGTGKTLLAKATAGESGVPFMSISGSDFMEMFVGVGPSRVRNLFQEARQCAPSIVFIDEIDAIGRARGRGGFSGS…	0.94	0.983333	1	1.06667	1.04667	1.01667	0.92, 0.93, 0.97	1.01, 0.98, 0.96	1.06, 0.99, 0.95	1.15, 1.07, 0.98	1.09, 1.06, 0.99	1.05, 1.01, 0.99	0.0152753	0.0145297	0.0321455	0.0491031	0.0296273	0.0176383
p6724	TPM=415.43 Putative ortholog: Os01g57968 expressed protein comp74_c2_seq1_g877	AAE[IL]TT[IL][IL]ESR, MTNFYTNFQVDE[IL]GR, VVDA[IL]GVP[IL]DGK, VYG[IL]NE[IL]QAGEMVEFASGVK	4	MEFSPRAAELTTLLESRMTNFYTNFQVDEIGRVVSVGDGIARVYGLNEIQAGEMVEFASGVKGIALNLENENVGIVVFGSDTAIKEGDLVKRTGSIVDVPAGKAMLGRVVDALGVPIDGKGALSDHERRRVEYVQLNHIGHAREGRVLPILGSLSPFLSLSPPPSLTAPTERPGRSRAFSGGFADRRWQRRGAGVDIRFSFLGFGFMPVVWSRVQDHLDQILSILCSWLRLLELRWSETVRFATPGISVYKIRLFYPWIRGVGLLSLPPLAGHGGEGKRKDRASICGSRGRRGPSSSLACRRLVRLSPLSDFAALPRWEVVRSASAASSCNNKRPICLLFSGGQSAPMLLLVGPGGEGEEQAVVGLATKQRRRLGSPCAQHALTVIVVAIFGRSSGLIS…	1.06	1.1225	1.155	1.0925	1.06	1.075	1.08, 0.95, 1.05, 1.16	0.86, 0.88, 1.7, 1.05	0.9, 1.08, 1.34, 1.3	0.84, 1.14, 1.27, 1.12	0.8, 0.93, 1.61, 0.9	1.05, 1.22, 0.79, 1.24	0.0433974	0.197162	0.102429	0.0904963	0.185427	0.104123
p56093	TPM=60.5 comp937_c0_seq1_g1489	AAEEANVYHD[IL]VK, ADDVTHF[IL]DV[IL]R, AN[IL]PGAEN[IL]VVQR, A[IL]QHYAE[IL]PD[IL]K, DPT[IL]AVVAYR, EG[IL]VSEA[IL]ESF[IL]R, ETSPQNSVV[IL][IL]DMAMPSQP[IL]R, RDPT[IL]AVVAYR, RP[IL]TADSA[IL]MNPNTR, VEEDAVWSQVAK, [IL][IL][IL]DSNNNPEHF[IL]TTNPFYDSR	11	PISPNTRAHTTRPPARPPPSCSRELSPPPSAAMAAANAPIAMREALTLTSLGIAPQFVTFTHVTMESERYICVRETSPQNSVVIIDMAMPSQPLRRPITADSALMNPNTRILALKAQIAGTTQDHLQIFNIEAKTKVKSHQMPEQVVFWKWITPKLLGLVTQTSVYHWSIEGDSEPAKMFDRTANLANNQIINYRCDPAEKWLVLIGIAPGAPERPQLVKGNMQLFSVDQQRSQALEAHAASFATFKVPGNENPSTLICFASKASNAGTITSKLHIIELGAQPGKPGFSKKQADLFFPPDFQDDFPVAMQISQKYGLVYVITKLGLLFVYDLETASAVYRNRISPDPIFLTAESSTTGGFYAINRRGQVLHATVNDATVVPFVSGQLNNLELAVNLAKR…	0.970909	1.00636	0.997273	1.03	1.03727	1	0.87, 1.01, 1.02, 1.01, 1.03, 1.05, 0.99, 1.0, 0.9, 0.97, 0.83	0.96, 1.03, 0.89, 1.16, 1.07, 1.15, 1.03, 1.01, 0.86, 1.09, 0.82	0.94, 1.01, 1.06, 0.85, 1.15, 0.96, 0.92, 1.03, 0.97, 1.19, 0.89	1.08, 1.0, 1.04, 0.85, 1.12, 0.91, 0.93, 1.03, 1.07, 1.23, 1.07	1.1, 1.01, 0.87, 1.16, 1.03, 1.1, 1.05, 1.02, 0.95, 1.13, 0.99	0.98, 0.98, 1.19, 0.73, 1.08, 0.83, 0.89, 1.02, 1.13, 1.09, 1.08	0.0216356	0.034146	0.0316541	0.0318519	0.0253374	0.041451
p17910	TPM=29.15 Putative ortholog: Os03g19290 mitochondrial import inner membrane translocase subunit Tim17, putative, expressed comp7756_c0_seq1_g557	AAG[IL]GA[IL]QAVTR, NWM[IL]D[IL]GHP[IL][IL]NR	2	MNTSETRKFVDEVRGLEKNWMLDLGHPLLNRVADSFVKAAGIGAIQAVTRDSYFMAVEGESGVTGSVSDATGTRKRTFPDLKGGSNNSKSAEAMVKGVSKESFQWGLAAGMHSGLTYGLTEVRGTHDWKNSAVAGAVTGAALALTLDNASHEQVVQCAITGAALSAAANVLSDIL	1.025	1.045	0.995	0.97	1.02	0.955	0.99, 1.06	1.06, 1.03	0.99, 1.0	1.0, 0.94	1.07, 0.97	0.93, 0.98	0.035	0.015	0.005	0.03	0.05	0.025
p21679	TPM=21.03 Putative ortholog: Os06g35470 L1P family of ribosomal proteins domain containing protein, expressed comp8373_c0_seq1_g582	AAGADVVGGDE[IL][IL]EE[IL]R, FANEPGPA[IL]APVSYPSR, PQAPPAEAPSPEAPSDS[IL]PR, VAVFAEGPAAEEAR, VA[IL]D[IL]VDA[IL]R, [IL]GSVTNDVSGAVK	6	PPAAAAATMAHLRLLLSHSRCHPHPHRLLPLFRFCSSNSSTSPPPPIKPVSYAPKPQAPPAEAPSPEAPSDSLPRRFQQPPQPQPQNPPRQFTRQEMRFANEPGPAIAPVSYPSRAAAPLPEDRPADEGAKEEDLRGEGERIEKEAQWGRMPVFGLQVEEETVPHPTLIPVVKRPQKVAIDLVDALREIKASANEKKRNFTETVEAHVMLGVDPRRGDQMVRGAITLPHGTGKTVRVAVFAEGPAAEEARAAGADVVGGDELIEEIRKGGGKLSFDKCIATPMYMPRLSKVARILGPRGLMPNPKLGSVTNDVSGAVKAAKSGRVDFKIDKTAIVHVGLGKVNFSEESLRENIGAFVNALLLAKPVGLKKTSKYVGYVKKFTLSSTMGPGFSVTIPSLS…	1.04667	0.981667	1.01667	0.973333	0.948333	1.04333	0.81, 1.09, 1.17, 1.17, 1.0, 1.04	0.79, 0.8, 1.13, 1.03, 1.01, 1.13	0.77, 1.01, 1.22, 1.12, 0.98, 1.0	0.96, 0.93, 1.05, 0.96, 0.98, 0.96	0.98, 0.74, 0.97, 0.88, 1.02, 1.1	0.98, 1.26, 1.09, 1.09, 0.96, 0.88	0.0549343	0.0624188	0.0617882	0.0166667	0.0508866	0.0544467
p8460	TPM=198.79 Putative ortholog: Os12g42876 5-methyltetrahydropteroyltriglutamate--homocysteine methyltransferase, putative, expressed comp281_c0_seq1_g143	AAGASW[IL]QFDEPT[IL]VK, EGVVYGAG[IL]GPGVYD[IL]HSPR, [IL]PSKEE[IL]ADR	3	MASHIVGYPRMGPKRELKFALESFWDGKTTAEDLQKVSTDLRASIWKQMADAGIKYIPSNTFSHYDQVLDTTAMLGAVPDRYSWTGGEITLSTYFSMARGNATVPAMEMTKWFDTNYHFIVPELGPDTKFAYSSHKAINEYKEAKALGVDTVPVLVGPVSYLLLSKPAKGVEKSFSPLSLLSSILPVYKEVIAELKAAGASWIQFDEPTLVKDLESHQLAAFCAAYSELESALSGLNVLVETYFADVPAESYKTLTSLSCVTAYGFDLVRGTKTLDLVKSGFPAGKYLFAGVVDGRNIWADDLAASLGTLQSLEAIVGKDKLVVSTSCSLMHTAVDLVNETKLDDEIKSWLAFAAQKVVEVNALAKALAGQKDEAYFAANAAALSSRRSSPRVTNEEVQ…	0.953333	1.00667	0.963333	1.01667	1.06333	0.96	0.98, 0.87, 1.01	0.97, 1.01, 1.04	1.02, 0.92, 0.95	1.04, 1.06, 0.95	0.99, 1.17, 1.03	1.06, 0.91, 0.91	0.0425572	0.0202759	0.0296273	0.0338296	0.054569	0.05
p6596	TPM=169.74 Putative ortholog: Os01g50910 late embryogenesis abundant protein, group 3, putative, expressed comp504_c0_seq1_g634	AAGTAQQTGSY[IL]GQTAEAAK, AGAEQTGSYVAQTAEVAK	2	GDHNNKALISIANIQSKPTLCTTRVLSSFCFSALVESYPVSVPAVSLPRRMASRQDQASYHAGEAKARAEEKTGHVMGAAQEKAREAKDTASDAAGRAMDRGGDAKEATREKAYEAKDAASDATGRAMDKGRGAAEATKEKGCEAKDKAAGTAQQTGSYIGQTAEAAKQKAAGAAQYTVDTARAGAEQTGSYVAQTAEVAKQKAGAVAQYAVDTAVAGKDKTGSLLVQAGETVKGAAVGAKDAVMNTIGMGGNTTNGSTNVPAKDTSTYKPGTRDY	0.98	1.01	1.055	1.08	1.03	1.05	1.02, 0.94	1.02, 1.0	1.09, 1.02	1.07, 1.09	1.0, 1.06	1.07, 1.03	0.04	0.01	0.035	0.01	0.03	0.02
p4493	TPM=142.36 TMHMM=14 SignalP=yes Putative ortholog: Os05g06480 inorganic H+ pyrophosphatase, putative, expressed comp528_c0_seq1_g1247	AANE[IL]EPA[IL]KK, AAV[IL]GDT[IL]GDP[IL]K, AGVQVVDV[IL]SPK, TDA[IL]DAAGNTTAA[IL]GK	4	MAILGELGTQVLIPVAGLIGIAFAVAQWVLVSKVKVTPGAATAAGGAKNGYGDYLIEEEEGLNDHNVVVKCAEIQTAISEGATSFLFTMYQYVGLFMVFFALLIFVFLGSIEGFSTKSQPCTYSTGTCKPALYTALFSTAAFLLGAITSLVSGFLGMKIATYANARTTLEARKGVGKAFITAFRSGAVMGFLLSSSGLVVLYITINVFKLYYGDDWEGLFESITGYGLGGSSMALFGRVGGGIYTKAADVGADLVGKVERNIPEDDPRNPAVIADNVGDNVGDIAGMGSDLFGSYAESSCAALVVASISSFGISHDFTAMCYPLLVSSVGIIVCLITTLFATDFFEIKAANEIEPALKKQLIISTALMTVGVAIISWLALPAKFTIFNFGAQKEVANWG…	1.0275	1.245	0.9875	0.9675	1.21	0.795	1.11, 0.95, 1.02, 1.03	1.35, 1.11, 1.51, 1.01	0.86, 0.98, 1.33, 0.78	0.78, 1.03, 1.3, 0.76	1.22, 1.16, 1.47, 0.99	0.64, 0.88, 0.89, 0.77	0.0327554	0.113541	0.121338	0.126713	0.099415	0.0583809
p2907	TPM=2.72 TMHMM=1 Putative ortholog: Os04g42620 uncharacterized protein At4g06744 precursor, putative, expressed comp27538_c0_seq1_g851	AANT[IL][IL]EV[IL]F[IL]NNK, A[IL]ASVDFNGYK, A[IL]QYFYE[IL]D[IL]SNNK	3	AHTSDASRRDLIGISIGKGGGISIGIGGGGGSSPPKQQPPPSSPSSEPQACDFENERIYRAYLVIQRFKQTITSDPQCITNTWTGTDVCGSYKGFFCEKPPNVNERALASVDFNGYKLQSASLVNFVDALPDLALFHANSNNFGGVVPNLRALQYFYELDLSNNKLAPCPFPTDVLGLTNSTFIDIRFNRFLGGLPAGLFCSFPIVEAIFVNNNKFDGKLPDNLGDSPVNYLSLANNQFTGPIPSSIARAANTLLEVLFLNNKLSGCLPYELGLLAKATVIDAGTNLFTGTIPASYACLRKVEQLNLANNLLYGVVPDALCRLAYDGHLTNLTLSGNYFTGLGACCWDLIKQGKLNVDRNCIPYAPNQRSHDECAGFFHRTKMTCPVSTHVPCYHKSYG…	1.05	1.1	0.99	0.946667	1.05	0.903333	1.02, 1.01, 1.12	1.14, 1.02, 1.14	0.92, 1.03, 1.02	0.91, 1.02, 0.91	1.12, 1.01, 1.02	0.81, 1.01, 0.89	0.0351188	0.04	0.0351188	0.0366667	0.0351188	0.0581187
p66511	TPM=79.34 comp5083_c0_seq1_g142	AANWNW[IL]VDP[IL]NGDK, NWSASG[IL][IL]EK, TTGAPQNHWFGPAGDPR	3	TPHKSNHSTAGPPRPILPIEPMSRLISRRHLAAAAALRRSPAAAAFASRWLHTPAFATVSPEEISGSSPAEVQNFVQGKWIKAANWNWIVDPLNGDKFIKVAEIQGAELKPFVESLSKCPKHGLHNPLRAPERYLMYGDISAKAARVLGQPEVLDFFAKLVQRVAPKSYQQALAEVQVTQKFLENFCGDQVRFLARSFAVPGNHLGQMSNGYRWPYGPVAIITPFNFPLEIPLLQLMGALYMGNKPVLKVDSKVSIVMEQMIRLLHDCGLPAEDVDFINSDGITMNKLLLEANPKMTLFTGSSRVAEKLAADLQGRIKLEDAGFDWKILGPDVQEVDYISWVCDQDAYACSGQKCSAQSMLFMHKNWSASGLLEKMKGLSERRKLEDLTIGPVLTVTTA…	0.956667	1.00333	1.00667	1.05667	1.05333	1.00667	0.95, 0.98, 0.94	1.11, 0.95, 0.95	1.03, 0.95, 1.04	1.09, 0.97, 1.11	1.17, 0.98, 1.01	0.93, 0.99, 1.1	0.0120185	0.0533333	0.02848	0.0437163	0.0589727	0.0497773
p11032	TPM=58.93 Putative ortholog: Os02g04690 cycloartenol synthase, putative, expressed comp2150_c0_seq2_g37	AANY[IL]ES[IL]QR, D[IL]FPVWA[IL]GEYR, TPYSE[IL]DWDNAR, [IL]EENEDVTEEAVSTS[IL]K, [IL]SPE[IL]VGEPVEVNR, [IL][IL]GEGPESGDGAMEK	6	LAAVEAARRDFAAGRHRLKHSADRLMRIQFAKEKPLKLDLPAIKLEENEDVTEEAVSTSLKKAISRFSTLQAHDGHWPGDYGGPMFLMPGLLITLYVTGALNTVLSSEHQKEIRRYLYNHQNDDGGWGLHIEGPSTMFGSALTYVSLRILGEGPESGDGAMEKGRNWILDHGGATYITSWGKFWLAVLGVFDWSGNNPLPPEIWMLSYRLPIHPGRMWCHCRMVYLPMCYIYGKRFVGRITPLILELRNELFKTPYSEIDWDNARNLCAKEDLYYPHPMIQDILWATLHKFVEPVMTHWPGNKLREKALNHVMQHVHYEDENTRYICIGPVNKVLNMLACWIEDPNSEAFKLHIPRIHDYLWVAEDGMKMQGYNGSQLWDTAFAVQAIAATGLIDESAP…	1.03	1.05333	1.04333	1.01167	1.01833	0.998333	1.04, 1.16, 1.14, 0.98, 1.0, 0.86	1.08, 1.35, 1.07, 1.01, 0.95, 0.86	1.12, 1.16, 1.13, 1.01, 0.94, 0.9	1.07, 1.0, 0.99, 1.04, 0.93, 1.04	1.03, 1.16, 0.94, 1.04, 0.94, 1.0	1.03, 0.86, 1.06, 1.0, 0.99, 1.05	0.0452401	0.0680523	0.0444722	0.0202347	0.0333083	0.0298236
p6765	TPM=258.74 Putative ortholog: Os10g32550 T-complex protein, putative, expressed comp410_c0_seq1_g940	AAPAMGGGGMGGMDF, CE[IL]DDP[IL][IL][IL][IL]YDK, GY[IL]SPYF[IL]TNQK, G[IL]SMAVDSVVTN[IL]K, M[IL]NTSEE[IL]AQVGT[IL]SANGER, QVANATNDTAGDGTTCATV[IL]TR, SVAAGMNAMD[IL]R, VSN[IL]QA[IL][IL]K	8	FFPPPQVAQPFFIRGSPPPLARSPLRNHPRDPTPSTFPRLAMYRAAASLASKARQAGTSARQVGSRLAWSRNYAAKDIRFGVEARAQMLRGVEELADAVKLTMGPKGRTVIIEQSFGAPKVTKDGVTVAKSIEFSDRVKNVGASLVKQVANATNDTAGDGTTCATVLTRAIFTEGCKSVAAGMNAMDLRRGISMAVDSVVTNLKGMARMINTSEEIAQVGTISANGEREIGELIAKAMEKVGKEGVITIADGNTLYNELEVVEGMKLDRGYISPYFITNQKTQKCELDDPIILIYDKKVSNLQALIKVLEYSHQKQKPLLIVAEDIESEALGMLILNKIRAGLKLCAVKAPGFGENRKSSLQDLAILTGGEVISEELGMNLEKFEPNMLGTCKKVTVSK…	1.14	1.14125	1.0825	0.96875	1.0075	0.96	1.12, 1.38, 0.95, 1.03, 1.06, 1.62, 1.05, 0.91	1.09, 1.47, 0.99, 1.11, 1.07, 1.43, 0.95, 1.02	1.03, 1.1, 0.97, 1.27, 1.04, 1.31, 0.95, 0.99	0.92, 0.8, 1.02, 1.23, 0.99, 0.81, 0.9, 1.08	0.98, 1.06, 1.04, 1.07, 1.01, 0.88, 0.9, 1.12	0.94, 0.75, 0.98, 1.14, 0.98, 0.92, 1.0, 0.97	0.084937	0.0699856	0.048283	0.050795	0.0295653	0.0380319
p31594	TPM=16.59 Putative ortholog: Os12g33958 NADH-ubiquinone oxidoreductase 49 kDa subunit, putative, expressed comp18385_c0_seq6_g1115	AAPYDVYDQ[IL]DFDVPVGTR, D[IL]DSFTQQFASR, [IL]DE[IL]EEM[IL]TGNR	3	MDVGALTPFLWAFEEREKLLEFYERVSGARMHASFIRPGGVAQDLPLGLCRDIDSFTQQFASRIDELEEMLTGNRIWKQRLVDIGTVTAQQAKDWGFSGVMLRGSGVCWDLRRAAPYDVYDQLDFDVPVGTRGDCYDRYCIRIEEMRQSVRIIVQCLNQMPSGMIKADDRKLCPPSRSRMKLSMESCAV	1.04333	1.05667	1.06	1.02667	1.02	1.00667	1.19, 1.01, 0.93	1.15, 1.03, 0.99	1.08, 1.12, 0.98	0.91, 1.11, 1.06	0.97, 1.02, 1.07	0.94, 1.09, 0.99	0.0768838	0.048074	0.0416333	0.0600925	0.0288675	0.0440959
p31672	TPM=4.01 Putative ortholog: Os03g08790 aspartic proteinase nepenthesin precursor, putative, expressed comp19688_c0_seq1_g197	AASTGVTSAPVASGQTPPSYVVR, VPAGSFGFDPSTGAGTV[IL]DSGTV[IL]TR	2	MAATPIPLLLVLAATLAAAADLSVYHNVHPPSTSPLESIIALARDDNARLLFLSSKAASTGVTSAPVASGQTPPSYVVRAGLGSPAQPILLALDTSADATWAHCSPCGTCPTSSLFVPANSTSYAPLPCSSTMCSVLQGQPCPSQDPYDSATPLPSCAFSKPFADASFDASLASDWLRLGKDAIPNYAFGCVGSVTGPTSNLPRQGLLGLGRGPMALLSQVGNMYSGVFSYCLPSYKSYYFSGSLRLGAAGQPTRARYTPMLKNPHRSSLYYVNVTGLSVGRSPVKVPAGSFGFDPSTGAGTVIDSGTVITRWTAPVYAALREEFRRHVAAPSGYTSLGAFDTCFNTDEVAAGGAPAVTIHMDGGVDLALPMENTLIHSSATPLACLAMAEAPQNVNAV…	1.245	1.04	1.375	1.1	0.85	1.33	1.39, 1.1	1.01, 1.07	1.59, 1.16	1.14, 1.06	0.73, 0.97	1.58, 1.08	0.145	0.03	0.215	0.04	0.12	0.25
p7900	TPM=132.47 Putative ortholog: Os06g06790 OsPDIL1-5 protein disulfide isomerase PDIL1-5, expressed comp1179_c0_seq1_g279	AATAENEVQFVETNDR, A[IL]VQFVE[IL]NK, FP[IL]VTVFTD[IL]NSAK, VNNYPT[IL][IL][IL]YPADDK, [IL][IL]FPG[IL]GSEEQF[IL]G[IL]VK	5	EAAAALRAMGSAVAFAKLDGERFPKAAAAVGVSGFPTVLLFVNGTEHTYTGLHTKDGIVTWVRKKTGAPVITLQSKDSAEAFLKKGQSFAIGLFKNYEGADHEEFVKAATAENEVQFVETNDRSVAKILFPGIGSEEQFLGLVKTEPEKFEKFDGAFEEKAIVQFVELNKFPLVTVFTDLNSAKVYGSPIKLQVFTFAEAYDFEDLESIVQEVARGFKTKIMFIYVDTAEENLAKPFLSLYGLEGDKPTVTAFDTNDGSKYLLEADINTKNLKEFCLRLADGTLSPYFRSEQIPQEKELVEKVVGRTFDSSVLESPHHVFLEAYAPWCVDCEAISKNIEKLAKHFSGLDNLKFARIDASVNEHPKLKVNNYPTLLLYPADDKTNPIKLSKKLSLKDMTR…	0.976	0.996	0.966	0.986	1.018	0.978	0.93, 1.01, 0.87, 1.02, 1.05	0.79, 1.06, 0.91, 1.03, 1.19	0.88, 1.01, 0.87, 1.1, 0.97	0.95, 1.0, 0.99, 1.07, 0.92	0.85, 1.05, 1.04, 1.01, 1.14	1.11, 0.95, 0.95, 1.07, 0.81	0.0331059	0.0680882	0.0427317	0.0254165	0.0472652	0.0527636
p10317	TPM=74.32 Putative ortholog: Os02g35039 NAD dependent epimerase/dehydratase family protein, putative, expressed comp1894_c0_seq1_g1448	AATDPVFPPG[IL]VDVYG[IL]MR, PSVSESWADK, [IL]P[IL]G[IL]VGSPMQMV[IL]QNAK	3	IYAVGSRDLAPRGRATCAPPLVPTAHRIDPKPHSLSPRTFHCYAPPSPSLPTRSPAPDESSPAASAMRSSLTRLIRSSCSASPSRLSSSVLLKNGKAFSSDATPRDSARVDEPFKVEEAEPVKMPPPPSPDKLLVLGGSGFVGSHVCKEALDRGFVVSSLNRSGKPSVSESWADKVIWNQGNLLEPSSLMDSMDGVSAVISCVGGFGSNSQMVKINGTANINAIRAAAEKGIKRFVYVSAADFGLVNYLLQGYYEGKRAAEAELLSKFTYGGVILRPGFIHGTRRVGSMKIPLGLVGSPMQMVLQNAKPLTRLPLVGPMLTPPVSATSVAKVAVRAATDPVFPPGIVDVYGIMRYSEQK	0.99	1.13667	0.966667	0.973333	1.14	0.856667	0.93, 1.04, 1.0	0.97, 1.31, 1.13	0.84, 1.06, 1.0	0.91, 1.02, 0.99	1.05, 1.25, 1.12	0.87, 0.81, 0.89	0.0321455	0.0982061	0.0656591	0.0328295	0.0585947	0.024037
p12974	TPM=54.96 Putative ortholog: Os03g04050 protein kinase family protein, putative, expressed comp2893_c0_seq1_g32	AATGGFAADN[IL]VSESGEK, GQVAPFAEFS[IL]AE[IL]R, SYSTN[IL]AYTPPEY[IL]R, [IL]EVPSYEM[IL]G[IL]PK, [IL]VT[IL][IL]EP[IL]QTK, [IL][IL]VAEFMPNDT[IL]AK	6	GGRGQVAPFAEFSLAELRAATGGFAADNIVSESGEKAPNFVYRGRLQADARRAIAVKKFTKMAWPDPKQFAEEARGVGKLRHRRLANLIGYCCDGDERLLVAEFMPNDTLAKHLFHWENQTIEWAMRLRVSYHIAEALDYCSNEGRPLYHDLNAYRVLFDENGDPRLSCFGLMKNSRDGKSYSTNLAYTPPEYLRNGRVTPESVIFSFGTVLLDLLSGKRIPPSHALDMMRGNNLQVLMDSHLEGNYSTEEATALVDLATQCLQYEPRDRPNTKKLVTILEPLQTKLEVPSYEMLGIPKIEEEAPPSPPPPPPAPQHPVSPLAEACSRMDLTAIQQILLTTHYRDDEGSNELSFQEWTQQMRDMLDARKRGDLAFRDKDFKTAIECYTQFADVGTMVSP…	1.06333	1.065	0.976667	0.925	1.01333	0.921667	0.97, 1.26, 1.07, 1.0, 1.0, 1.08	0.94, 1.06, 0.9, 1.14, 1.18, 1.17	1.03, 1.07, 0.82, 0.96, 0.96, 1.02	1.06, 0.85, 0.77, 0.96, 0.97, 0.94	0.97, 0.84, 0.85, 1.14, 1.19, 1.09	1.09, 1.01, 0.91, 0.84, 0.81, 0.87	0.0431019	0.0492443	0.0358391	0.0413723	0.0610282	0.0440013
p20701	TPM=15.46 Putative ortholog: Os05g39390 outer membrane protein, OMP85 family protein, expressed comp7933_c0_seq1_g390	AATTVQD[IL][IL]GAASEASAR, AS[IL]MSQDW[IL]K, EQ[IL][IL]EAEAAD[IL][IL]R	3	MADASDPAADQNPKDAGTREPDPRAGSNGETPEEECEYEEVDEDELDGPAAAAVEREKVQSVLRRLSSDPVAIRVHDVIIRGNAKTKEQLIEAEAADILRAATTVQDLLGAASEASARLRGLDVFDAVNITLDAGPPELPGTTNVVIEVVEAASPVTGNAGVYSKPEARSWSIEGALKLKNLAGYADIWDASVAYGWDQTSEVGVGVSVPRFKSIPTPLMARASLMSQDWLKFSSYKERALGLSLGLVSTRNHDLSYNLAWRTLTDPSQSASQSIRRQLGHNLLSALKYTYKIDHRDSHLRPTRGYAFHSASQVGGLWDNKGLKFFRQEFDVRAAVPFGFYNAALNFGLGAGVILPLGRGFLDSATPVTDRFNLGGYSSPVCSLGGISSLLGFRTRGVG…	0.98	0.903333	0.956667	0.976667	0.93	1.09333	1.01, 0.92, 1.01	0.69, 0.98, 1.04	0.97, 0.97, 0.93	0.96, 1.05, 0.92	0.69, 1.07, 1.03	1.39, 0.99, 0.9	0.03	0.108064	0.0133333	0.0384419	0.120554	0.150591
p65166	TPM=35.18 comp3546_c0_seq6_g663	AAV[IL]ADMDS[IL]GK, AWAASQG[IL]QNED[IL]R, [IL]MTSGASP[IL]SADVMEF[IL]R, [IL]VDVPEMNYTSEDQPYPR, [IL]YSA[IL]TNAVK	5	MRPSHRSLRPPRSRSVRFASAHAIIKVHNYFLPSFPFVAAPTLPASNAIDGDWRSLAQQSTAAASHSHPTEAPAMSRQQEEERSPAAMDAARRRLRVVSGHFRPHADATGGLDANPTAGEYAHVQGYGVVLPEKLQTGKWNVYRSSRSPLRLVNRFPATPDIGTLHENFVYAVETFTDCRYLGTRVSTDGTVGDYKWMTYGEASTSRTAIGSGLIYHGIPEGARIGLYFINRPEWIIVDHACSAYSYVSVPLYDTLGPDAVQFIVNHATVEAIFCVPQTLSTLLSFVTQMPCVRLIVVVGGDDANTPPSTETTGVKIITYSRLQSEGKMSSQTYRPPRPEDVATICYTSGTTGTPKGAVLSHQNLIANVAGSSLGIKFYPSDVYISYLPLAHIYERANQ…	1.018	0.99	1.036	1.014	0.98	1.052	0.87, 0.95, 1.08, 1.17, 1.02	0.99, 0.85, 0.92, 1.16, 1.03	0.83, 0.98, 1.21, 1.22, 0.94	0.96, 1.03, 1.12, 1.04, 0.92	1.14, 0.9, 0.86, 0.99, 1.01	0.84, 1.15, 1.31, 1.05, 0.91	0.0517107	0.0524404	0.0771103	0.0345832	0.0486826	0.0840476
p41479	TPM=13.54 TMHMM=1 SignalP=yes comp12887_c0_seq5_g686	AAV[IL]NFYDT[IL]R, FEEVDDVNNFR, FVDDTVAYFGR, GAY[IL]A[IL]VAR, WFTQPAS[IL]QTPD[IL]R, [IL]TE[IL][IL]PGVVESE[IL]TK, [IL]TTS[IL][IL]SSVFPEDVSGK	7	MLMSKLGGLAMEVALAAPLVLFLPAYYVYKLTTSLLSSVFPEDVSGKVVLITGASSGIGEHLAYEYAKRGAYLALVARREASLGEVADNASALGAPGVLVLPADVSKPDDCQKFVDDTVAYFGRLDHLVNNASIWQVCRFEEVDDVNNFRTLMDINFWGHVYPTRHAIPHLKKTHGRIVGVTSNSSYIFIGRNSFYNASKAAVLNFYDTLRMELGGDVRITEIIPGVVESEITKGKMLTKEGKMKVDQDQRDAVLGPTPAEPVALFAKRVVREVCRGARYVFEPRWYLAVYMFRVCFPDILAWSSQLLTVNSVGPAKTDTLGKTILDMPGVRWFTQPASLQTPDIRAG	0.93	0.938571	0.98	1.05429	1.01	1.04714	0.99, 0.89, 0.8, 0.92, 1.0, 0.98, 0.93	1.02, 0.93, 0.76, 0.88, 0.92, 1.12, 0.94	1.02, 0.98, 0.82, 0.95, 1.03, 1.09, 0.97	1.03, 1.1, 1.02, 1.03, 1.04, 1.11, 1.05	1.03, 1.05, 0.95, 0.96, 0.93, 1.14, 1.01	1.0, 1.05, 1.08, 1.07, 1.12, 0.97, 1.04	0.0265474	0.0423381	0.0319225	0.0136027	0.0273426	0.018988
p19509	TPM=19.85 Putative ortholog: Os03g61920 electron transfer flavoprotein subunit alpha, mitochondrial precursor, putative, expressed comp7127_c0_seq1_g978	AAVDAGYVPNE[IL]QVGQTGK, SAENFQ[IL][IL]EQ[IL]AEK, STSFSPTTESMSETK, VS[IL][IL][IL]AGSGPT[IL]HR	4	MTMAAALVAGALRRGRAGGARNVAGEALRRLVSTLVVAEHEGGLVKPSSLSALAAAEAIAKDNKVSLLLAGSGPTLHRAAEHAAASHPLVNEVLVADSDVFAHPLAEPWAELLRSVQQKGGYSHVIASSTSFGKNLLPRAAALLDVSPVTDVTAISEPRVFVRPIYAGNALCTVRYTGENPCMMSIRSTSFSPTTESMSETKVAPITQVDLSFLSEASSSKSSWVNITSQDTERPDLANARVVVTGGRGLKSAENFQLLEQLAEKLGAAVGATRAAVDAGYVPNELQVGQTGKIVAPELYIAFGVSGAIQHLAGMRDSKVIVAVNKDADAPIFQVADYGIVGDLFEVLGQLLEKIPDKK	1.025	0.93	1.0025	0.9825	0.91	1.085	1.08, 0.91, 1.05, 1.06	1.06, 0.85, 0.94, 0.87	0.95, 0.98, 1.08, 1.0	0.87, 1.08, 1.03, 0.95	0.98, 0.94, 0.9, 0.82	0.89, 1.15, 1.15, 1.15	0.0388373	0.0474342	0.0278014	0.0460751	0.0341565	0.065
p59889	TPM=143.82 comp934_c0_seq1_g1626	AAVEEG[IL]VPGGGVA[IL][IL]YASK, CE[IL]EDP[IL][IL][IL][IL]HDK, EAPAMGGMGGMDY, GY[IL]SPYFVTNQK, VG[IL][IL]DP[IL]K	5	MKLDRGYISPYFVTNQKTQKCELEDPLILIHDKKISNMHAVVKVLEMALKKQRSLLIVAEDLESEALGTLILNKLRAGIKVCAVKAPGFGDNRKANLLDLAVLTGGEVISEEIGMNLENFDIQMLGTCKKVTVSKDDTVILDGAGDKKNIEERADQIRSAIEQTTSDYDKEKLEGRLAKLSGGVAVLKIGGASEAEVSEKKDRVTDALNATKAAVEEGIVPGGGVALLYASKALDKLQTANFDQKIGVQIIQNALKTPVYTIASNAGVEGAVVVGKLLEQDNTDLGYDAAKGEYVDMVKVGIIDPLKVIRTALVDAASVSSLMTTTEAIIVESPKEEKEAPAMGGMGGMDY	1.05	1.076	1.028	0.998	1.024	1.028	0.96, 1.47, 1.03, 0.85, 0.94	1.06, 1.65, 0.64, 1.0, 1.03	0.95, 1.27, 1.01, 0.9, 1.01	1.0, 0.86, 0.99, 1.07, 1.07	1.11, 1.12, 0.62, 1.18, 1.09	0.9, 0.77, 1.58, 0.9, 0.99	0.108858	0.162438	0.0639062	0.0383927	0.102108	0.142387
p12896	TPM=36.28 Putative ortholog: Os08g01760 dehydrogenase, putative, expressed comp3742_c0_seq1_g1211	AAVFWEPGRP[IL]TMEEFR, GQED[IL]CESFFAYNR, [IL]EEANSAYDDMNK	3	DLQLESSQARTRSMSISTASRRALSRIGGALRRSFSSAPDSAAGYQVSGGPSFMRAAVFWEPGRPLTMEEFRMPRPKAGEVLVKTKACGVCHSDLHVMKGELPFSSPCVVGHEITGEVVDHGAHTPAEIVNRFPVGSHVVGAFIMPCGNCFYCVKGQEDLCESFFAYNRAKGTLYDGETRLFLRSNGKPVYMYSMGGLAEYCVVPANALAVLPSSLPYTESAILGCAVFTAYGALRHAAEMRAGDSVAVIGVGGVGSSCLQIAKAFGASEIIAVDVLDEKLQNARTLGATHTVNATKEDAVEKIKEITGGRGVDVAVEALGKALTFAQCTQSVRDGGKAVMIGLAATNVVGEVDITRLVRRQVKIIGSYGARARQDLPQIVKLAERGAFDLKNAISRKC…	1.03667	1.21	1.21	1.20667	1.17	1.03333	0.96, 1.27, 0.88	1.15, 1.47, 1.01	1.1, 1.15, 1.38	1.15, 0.9, 1.57	1.2, 1.16, 1.15	0.96, 0.78, 1.36	0.11893	0.136137	0.0862168	0.195477	0.0152753	0.171399
p56127	TPM=228.17 comp827_c0_seq3_g1557	AAVSA[IL]QNQP[IL]VNAV[IL]DGDD[IL][IL]YR, [IL]ASPSEPQ[IL]PPK	2	MASRLATRLLFRRRAAVVSFLQSYRHARHFSTQLLEGVPRFSKPTCGRYLLPNASPYQIWSRSFASENGDLFEAVVSYMYESRTDGTLANFLKKPGDRVEADEVIAQIETDKVTIDVSSPEAGVIEKFTASEGDTVTPGTVIATISKSAAPSEAHAAPSKETSQKETPPPPPPEKPKVEEKTPKVESVKKQASKLASPSEPQLPPKERERRVSMPRLRKRIANRLKDSQNTFALLTTFNEVDMTNLMKLRSDYKDEFVKKHGVKLGLMSCFVKAAVSALQNQPIVNAVIDGDDIIYRDYIDISVAVGTSKGLVVPVIRDADTMNFADIEKGINNLAKKATEGALSIDEMAGGTFTISNGGVYGSLISTPIINPPQSAILGMHSIVQRPVVVDGNILARP…	1.025	1.125	1.06	1.035	1.1	0.945	0.92, 1.13	1.02, 1.23	0.98, 1.14	1.06, 1.01	1.11, 1.09	0.96, 0.93	0.105	0.105	0.08	0.025	0.01	0.015
p1379	TPM=65.72 TMHMM=1 Putative ortholog: Os01g39310 SEY1, putative, expressed comp1587_c0_seq1_g405	AAVSG[IL]ESA[IL]STFE[IL]DEATEK, A[IL]AEPVEA[IL][IL]DSASEETWPA[IL]R, FEEAVQSDYVPGFGK, FQHS[IL]APGG[IL]AGDR, NGF[IL]PA[IL][IL]S[IL]STK, S[IL]QS[IL]DP[IL]ASSSWER, [IL]ASFTADEEWQK, [IL]DEDGDN[IL]DNT[IL]S[IL]A[IL]VDAAR	8	TLPPTSRRRQNPNIFPFLPPSAFPFVFTVHTIATPPSIRNSQITDFPIKRRRLCAPPLSSFSPRPRFLPSAPSIAADATPTAERRNLHEMEEPCLSTQLIDGDGVFNVSGLESFLKEVKLAECGLSYAVVSIMGPQSSGKSTLLNHLFRTNFREMDAFRGRSQTTKGIWMAHAKNIEPCTLVMDLEGTDGRERGEDDTAFEKQSALFALAVSDIVLINMWCHDIGREQAANKPLLKTVFQVMMRLFSPRKTTMLFVIRDKSKTPLENLEPILREDIQKIWDGVPKPHAHKETPLSDFFNVQVVALNSYEEKEELFKEQVSSLRDRFQHSIAPGGLAGDRRGVVPASGFSFSSQHFWKVIKENKDLDLPAHKVMVATVRCEEIGNEKLASFTADEEWQKF…	0.99	1.02125	1.01125	1.025	1.035	0.99875	1.01, 1.05, 1.01, 0.9, 1.05, 1.01, 0.85, 1.04	1.14, 1.14, 0.91, 0.88, 1.12, 0.87, 0.97, 1.14	1.05, 1.06, 0.96, 0.95, 1.04, 1.02, 0.93, 1.08	1.04, 1.02, 0.95, 1.06, 0.99, 1.01, 1.1, 1.03	1.13, 1.09, 0.9, 0.98, 1.07, 0.86, 1.15, 1.1	0.92, 0.93, 1.06, 1.08, 0.93, 1.17, 0.96, 0.94	0.0262543	0.0442976	0.020039	0.0159239	0.0384057	0.032811
p7036	TPM=228.17 Putative ortholog: Os04g32330 dihydrolipoyllysine-residue succinyltransferase component of 2-oxoglutarate dehydrogenase complex, mitochondrial precursor, putative, expressed comp827_c0_seq1_g1566	AAVSG[IL]QNQP[IL]VNAV[IL]DGDD[IL][IL]YR, FEAVVPFMGESVTDGT[IL]ATF[IL]K	2	MASRIASRLLRRHGPTLGLLRSYTHVRNYSSQLSGLIPAGSQSSKLTRRHYYFPNASPYQLWSRSFASDSGEKFEAVVPFMGESVTDGTLATFLKKPGDRVEADEAIAQIETDKVTIDVSSPEAGVLEKYIASEGDTVTPGTIVAIVSKSEAPAETHVAPSEEAAPKESPPAKVEEKSPKVEAKSPKVEPPKKQAPKPTPSKTSPTEPQLPPKERERRVPMPRLRKRIANRLKDSQNTFAMLTTFNEVDMTNLMKLRSDYKDEFVKKHGVKLGLMSCFVKAAVSGLQNQPIVNAVIDGDDIIYRDYVDVSVAVGTSKGLVVPVIRDADTMNFADIEKGINNLAKKATEGALSIDEMAGGTFTISNGGVYGSLISTPIINPPQSAILGMHSIVQRPVVVD…	1.045	1.035	1.05	1	0.985	1.015	0.99, 1.1	0.95, 1.12	0.97, 1.13	0.98, 1.02	0.96, 1.01	1.02, 1.01	0.055	0.085	0.08	0.02	0.025	0.005
p7830	TPM=1186.96 Putative ortholog: Os01g68790 RNA recognition motif containing protein, putative, expressed comp28_c0_seq1_g145	AAVTGMDGQE[IL]EGR, DAFSGFGEVTEAR, GFGFVNFAEEEAAK, [IL]FVGG[IL]SWGTDDCK	4	MAAFNKLGSLLRQSPLTSRASTASAPALFNAARYMSSKLFVGGLSWGTDDCKLRDAFSGFGEVTEARVITDRETGRSRGFGFVNFAEEEAAKAAVTGMDGQELEGRSVRVNFANERERPAGGGGYGGGGGGYGGGRGGGGGSYGGGGYGGGGGDRGFGGGQDSY	1.11	1.09	1.0575	0.9525	0.9875	1.0125	1.2, 1.07, 1.05, 1.12	0.82, 1.03, 1.17, 1.34	1.12, 1.17, 0.99, 0.95	0.93, 1.09, 0.94, 0.85	0.68, 0.96, 1.11, 1.2	1.37, 1.13, 0.84, 0.71	0.0334166	0.110076	0.0521816	0.0500625	0.113826	0.148008
p7823	TPM=130.2 Putative ortholog: Os03g58630 thioredoxin, putative, expressed comp1030_c0_seq1_g138	AAWDQQFEAHR, VEAMPTFV[IL]VK, [IL]DVDE[IL]GEVAK	3	GGHAPSIIASLPSSRVCFFSIPTVHGTRRTPANRATPSQANMGSFLSSLVTPPPLDDGGDSAVVAVHSKAAWDQQFEAHRNAAKLMVIDFSASWCGPCRFIEPAFKEMASRFTDAVFVKIDVDELGEVAKTFRVEAMPTFVLVKGGQEVSRVVGAKKDELDRKIKTFIASC	0.993333	1.01667	0.94	0.946667	1.02667	0.933333	1.03, 0.97, 0.98	0.92, 1.03, 1.1	0.98, 0.87, 0.97	0.95, 0.9, 0.99	0.89, 1.07, 1.12	1.07, 0.85, 0.88	0.0185592	0.0523874	0.0351188	0.0260342	0.0698411	0.0688799
p59631	TPM=54.56 comp1850_c0_seq1_g1243	ACVAYGGAP[IL]HQQ[IL]R, E[IL]SVQ[IL]HEEAK, SGATP[IL][IL]VATDVAAR, SGVATAFFNEGNMS[IL]AR, SY[IL]MD[IL][IL]HAQK, TAYP[IL]A[IL][IL][IL]SPTR, WAAPPGAVSSGVGVTR	7	MRSSWADSVANAEESAPATVAAPAPVANHQNSRPTRSSYVPPHLRGRSPDSLAPPPAPAGIQPSGPVPPTGGYAAAVGGTRWAAPPGAVSSGVGVTRQSGGGGRGAAGGGGAGWNSRPGWGDRRDREPNPFGDSEPVPAVAADVDFETQANTGINFDAYEDIPVETSGHDVPTPVNTFAEIDLGDALNENIRRCKYVKPTPVQRHAIPIVIGGRDLMACAQTGSGKTAAFCFPIISGIMKSRPPQRPRGSRTAYPLALILSPTRELSVQIHEEAKKFAYQTGVKACVAYGGAPIHQQLRELERGVDILVATPGRLMDLLERARVSLQMVNYLALDEADRMLDMGFEPQIRKIVEQMDMPPRGVRQTMLFSATFPKEIQRLASDFLADYIFLAVGRVGSS…	1.04143	1.00571	1.00571	0.97	0.974286	1.00429	1.19, 0.94, 1.14, 0.95, 0.93, 0.98, 1.16	1.0, 1.08, 1.04, 0.89, 0.96, 1.06, 1.01	1.06, 0.99, 0.94, 1.02, 0.93, 0.96, 1.14	0.89, 1.06, 0.82, 1.07, 0.99, 0.98, 0.98	0.84, 1.15, 0.91, 0.94, 1.03, 1.08, 0.87	1.06, 0.92, 0.9, 1.14, 0.97, 0.91, 1.13	0.0438302	0.024481	0.0282722	0.033665	0.0434718	0.039452
p59455	TPM=537.82 comp239_c0_seq1_g879	AD[IL][IL]AY[IL]K, QGPN[IL]HG[IL]FGR	2	AAAAAGRNRQQAEQKFHLPSPSLSPRVESSRRVSAAAAAAMASFSEAPPGNPAAGAKIFKTKCAQCHTVEQGAGHKQGPNLHGLFGRQSGTTAGYSYSAANKNKAVEWEENTLYDYLLNPKKYIPGTKMVFPGLKKPQDRADLIAYLKGATSS	1.005	1.01	1.035	1.03	1.005	1.035	1.02, 0.99	1.13, 0.89	1.04, 1.03	1.02, 1.04	1.11, 0.9	0.92, 1.15	0.015	0.12	0.005	0.01	0.105	0.115
p5175	TPM=22.81 SignalP=yes Putative ortholog: Os01g16220 Sad1 / UNC-like C-terminal domain containing protein, putative, expressed comp6739_c0_seq1_g765	AD[IL]AA[IL][IL]EDKR, ET[IL]GSDSGSQVD[IL]DQVR, G[IL][IL]PDA[IL]T[IL]EHVAK	3	VSQPRRKRAPSSSGRPRWLTLLSVAAKNAALLAVLIYLGDQAWRWAHPLPLAPLDQAALAGYNARVDDVEASLARAFRGLQLQLEAVDRKIDGEVGAARADLAALLEDKRLALEGHLNLLDARTDDLNHALKGMEFLRKDEFDAFLSEIKETLGSDSGSQVDLDQVRALAREIVMREIEKHAADGIARVDYALGSAGGRVARYSEPYDAGKRPGGLLAALPFGAGGSAGDQSQKMIQPSFGEPGQCFPLKGSTGFVEIHLRKGIIPDAITLEHVAKDVAYDMSTAPKDCQISGWYQAAPTETPPSPAAKVYALTEFTYDLAKSNVQTFEITAPDVGVVNMVRLDFTSNHGSSSLTCIYRIRVHGHEAVTPRIASSLP	1.11667	1.09333	1.01667	0.916667	0.983333	0.93	1.12, 1.22, 1.01	1.18, 1.11, 0.99	1.06, 0.98, 1.01	0.95, 0.8, 1.0	1.06, 0.91, 0.98	0.9, 0.88, 1.01	0.0606447	0.0554777	0.0233333	0.0600925	0.0433333	0.0404145
p7204	TPM=107.96 Putative ortholog: Os07g22720 2-oxo acid dehydrogenases acyltransferase domain containing protein, expressed comp1008_c1_seq1_g543	AD[IL]EDY[IL]ASAAK, QT[IL]PHYY[IL]TVDTR, SETFAASG[IL]DYTD[IL]PNAQ[IL]R, V[IL]DGA[IL]GAEF[IL]K, [IL]AEDNNVP[IL]SSVK	5	MSAAHLLRHSRKLRSLRNAIDCERSGLARYFSTGSGSFALKENGVEKRIGGARFSQYKQSGKNLETCKVSVGGVNGSSAFRGTLTNRISSGVTGLNGPLSCVRVASARSFSSSADLPPHQEIGMPSLSPTMTEGNIAKWVKKEGDQVSPGEVLCEVETDKATVEMECMEEGYLAKIVQGDGAKEIKVGEIICVTVEEEGDIEKFKDYKPSSSDAPVAPSESKAKSEPAEPKAEEKVPAKAPEPKAPKTEEASRSGDRIFSSPLARKLAEDNNVPLSSVKGTGPDGRILKADIEDYLASAAKGGKSETFAASGLDYTDIPNAQIRKVTANRLLASKQTIPHYYLTVDTRVDNLIKLRGELNPQQEASGGKKISINDLVIKAAALALRKVPQCNSSWMNDF…	0.948	1.026	0.974	1.036	1.096	0.958	0.91, 1.05, 1.06, 0.93, 0.79	1.11, 0.96, 0.94, 1.09, 1.03	0.99, 0.99, 1.02, 0.92, 0.95	1.09, 0.94, 0.96, 0.99, 1.2	1.21, 0.91, 0.89, 1.17, 1.3	0.89, 1.04, 1.08, 0.85, 0.93	0.0498397	0.0338526	0.0174929	0.0484355	0.082801	0.0439773
p17340	TPM=23.81 Putative ortholog: Os06g01630 2-oxo acid dehydrogenases acyltransferase domain containing protein, expressed comp5452_c0_seq1_g593	AD[IL]EDY[IL]SSVAK, EVSAAPG[IL]GYVD[IL]PNTQ[IL]R, G[IL]AT[IL]ADEVK, QFCA[IL]VNPPQSA[IL][IL]A[IL]GSAEK, SE[IL]NP[IL]QEASGGK, V[IL]DGAMGAEW[IL]K	6	PSSVILYISFSSIGDTRKGFRSPPIPLPSSLPAAIMALLLRHSRKLQRVHGVLDYERGSIARHFSVSACSTAVKEDGVSSSSVHGDYGKKVGSSSIFHERLSGKGPGTSKVSPREARGSYISKRMQISATGANSLFSCGQVVSARQFSSGADLPAHEEIGMPSLSPTMTEGNIARWVKKEGDKVSPGEVLCEVETDKATVEMECMEEGYLAKIVCGDGAKEIKVGEIICITVEEEGDIEKFKDYKASSSASAAPPAESKPQSETPEPKEEKKELSKAPEPKSTKTEESGDRLFSSPVARKLAEDNNVPLSSLKGTGPDGRILKADIEDYLSSVAKDTKKEVSAAPGLGYVDLPNTQIRKVTANRLLQSKQTIPHYYLTVDSRVDKLIKLRSELNPLQEA…	0.966667	0.978333	1.00167	1.04	1.01333	1.03167	0.98, 0.92, 0.96, 1.07, 0.98, 0.89	1.07, 0.9, 1.07, 1.0, 0.87, 0.96	1.11, 0.89, 0.94, 0.91, 1.19, 0.97	1.13, 0.97, 0.98, 0.85, 1.22, 1.09	1.09, 0.98, 1.11, 0.94, 0.89, 1.07	1.03, 0.99, 0.88, 0.91, 1.37, 1.01	0.0252543	0.0343915	0.0492894	0.054037	0.0365756	0.0717596
p6222	TPM=569.86 TMHMM=9 Putative ortholog: Os05g25550 E1-E2 ATPase domain containing protein, expressed comp96_c0_seq1_g1125	AD[IL]G[IL]AVDDATDAAR, A[IL]V[IL]GVNVK, DAS[IL]ES[IL]PVDE[IL][IL]EK, GAPEQ[IL]VS[IL]CNCK, GVDKEHV[IL][IL][IL]AAR, KAD[IL]G[IL]AVDDATDAAR, NEAVD[IL]EN[IL]P[IL]EEVFEQ[IL]K, N[IL]VEVFAK, TA[IL]TY[IL]DAEGNWHR, VENQDA[IL]DACMVGM[IL]ADPK, VE[IL]FG[IL]NK, WGEQEAS[IL][IL]VPGD[IL]VS[IL]K, [IL]DQSG[IL]TGES[IL]PVTK	13	MGGLEEIRNEAVDLENIPIEEVFEQLKCTRQGLTSDEGAQRVEIFGLNKLEEKKESKILKFLGFMWNPLSWVMEMAAIMAIALANGDGKPPDWQDFIGIIVLLVINSTISFIEENNAGNAAAALMANLAPKTKVLRDGRWGEQEASILVPGDIVSIKLGDIVPADARLLEGDPLKIDQSGLTGESLPVTKNPGDEVFSGSTCKQGEIEAVVIATGVHTFFGKAAHLVDSTNQVGHFQQVLTAIGNFCIISIAVGIVIEIIVMFPIQRRKYRAGIENLLVLLIGGIPIAMPTVLSVTMAIGSHKLSQQGAITKRMTAIEELAGMDVLCSDKTGTLTLNKLSVDKNLVEVFAKGVDKEHVLLLAARASRVENQDAIDACMVGMLADPKEARAGIREVHFLP…	1.00769	1.11385	1.01077	1.01385	1.10692	0.918462	0.98, 0.93, 0.97, 1.34, 1.0, 0.99, 0.91, 0.92, 1.0, 1.12, 0.91, 1.08, 0.95	0.96, 1.15, 1.14, 1.48, 1.14, 1.09, 1.02, 1.02, 0.91, 1.31, 1.02, 1.16, 1.08	1.0, 1.05, 1.01, 1.07, 1.06, 0.99, 1.0, 0.95, 0.96, 1.02, 0.98, 1.02, 1.03	1.02, 1.14, 1.04, 0.8, 1.06, 1.0, 1.11, 1.03, 0.97, 0.91, 1.07, 0.95, 1.08	0.98, 1.24, 1.17, 1.11, 1.14, 1.11, 1.13, 1.11, 0.91, 1.17, 1.12, 1.07, 1.13	1.03, 0.92, 0.89, 0.72, 0.94, 0.91, 0.98, 0.93, 1.06, 0.78, 0.95, 0.88, 0.95	0.0327217	0.041657	0.0100933	0.0251289	0.023243	0.0252893
p2937	TPM=35.23 TMHMM=8 SignalP=yes Putative ortholog: Os07g09340 plasma membrane ATPase, putative, expressed comp2808_c0_seq1_g664	AD[IL]G[IL]AVDDSTDAAR, A[IL]N[IL]GVNVK, DES[IL]VA[IL]PVDE[IL][IL]EK, GAPEQ[IL][IL]D[IL]AHNK, S[IL]GVAYQEVPDGR, TA[IL]TY[IL]DAEGK, [IL]DQSS[IL]TGES[IL]PVTK	7	LEEKKESKFLKFLGFMWNPLSWVMEAAAIMAIALANGGGKPPDWQDFVGIITLLIINSTISFIEENNAGNAAAALMARLAPKAKVLRNGKWNEEESAILVPGDIISVKLGDIIPADARLLEGDPLKIDQSSLTGESLPVTKGPGDGVYSGSTCKQGELEAVVIATGVHTFFGKAAHLVDSTNQVGHFQKVLTAIGNFCICSIAVGMVIEIVVMYPIQHRAYRPGIDNLLVLLIGGIPIAMPTVLSVTMAIGSHRLAQQGAITKRMTAIEEMAGMDVLCSDKTGTLTLNKLTVDKNLIEVVQRGIDQDTVILMAARASRTENQDAIDATMVGMLADPKEARAGIQEVHFLPFNPTDKRTALTYLDAEGKMHRVSKGAPEQILDLAHNKSEIERRVRVVID…	0.971429	0.988571	1.02286	1.05571	1.02	1.05	1.03, 0.95, 0.93, 0.94, 0.93, 1.01, 1.01	0.83, 1.08, 1.1, 1.0, 0.86, 1.09, 0.96	1.03, 0.97, 1.16, 0.93, 1.04, 0.95, 1.08	1.0, 1.02, 1.24, 1.0, 1.12, 0.94, 1.07	0.8, 1.14, 1.18, 1.07, 0.92, 1.08, 0.95	1.25, 0.89, 1.06, 0.93, 1.22, 0.87, 1.13	0.0163923	0.0418858	0.0305282	0.0375346	0.0510369	0.0593216
p7387	TPM=343.77 Putative ortholog: Os05g41640 phosphoglycerate kinase protein, putative, expressed comp197_c0_seq1_g937	AD[IL]NVP[IL]DDAQK, E[IL]DY[IL]VGAVANPK, KPFAA[IL]VGGSK, P[IL]PGV[IL]A[IL]DEA, [IL]AAA[IL]PEGGV[IL][IL][IL]ENVR, [IL]ASVAD[IL]YVNDAFGTAHR, [IL]GV[IL]ES[IL][IL]AK, [IL]VSADA[IL]PDGWMG[IL]DVGPDS[IL]K	8	HVTDTAPQQIPEYSLATPSASIKKPGLRRHIHPSIRPTKAASPLPHSLVQIAADSIRFLHGMATKRSVGTLGEADLKGKKVFVRADLNVPLDDAQKITDDTRIRASIPTIKFLLGKGAKVILASHLGRPKGVTPKFSLKPLVPRLSELLGVDVVMANDCIGEEVEKLAAALPEGGVLLLENVRFYKEEEKNDPEFAKKLASVADLYVNDAFGTAHRAHASTEGVTKFLRPSVAGFLMQKELDYLVGAVANPKKPFAAIVGGSKVSSKIGVIESLLAKVDILILGGGMIFTFYKAQGKAVGKSLVEEDKLELATSLIETAKAKGVSLLLPTDVVVADKFAPDAESKIVSADAIPDGWMGLDVGPDSIKTFSDALDTTKTVIWNGPMGVFEFEKFAAGTDA…	0.99375	1.02875	1.0025	1.02	1.03875	0.98375	0.88, 1.02, 1.15, 0.92, 1.15, 0.88, 0.92, 1.03	1.01, 1.04, 1.2, 1.14, 1.03, 0.82, 0.96, 1.03	1.06, 1.0, 1.12, 0.95, 0.96, 0.91, 1.0, 1.02	1.21, 0.99, 0.97, 1.04, 0.84, 1.03, 1.09, 0.99	1.15, 1.02, 1.04, 1.24, 0.89, 0.93, 1.04, 1.0	1.05, 0.97, 0.94, 0.83, 0.94, 1.11, 1.04, 0.99	0.0395482	0.0401976	0.0233567	0.0373688	0.0397958	0.0302335
p6206	TPM=127.3 TMHMM=1 Putative ortholog: Os01g69250 mitochondrial import receptor subunit TOM20, putative, expressed comp967_c0_seq1_g645	ADA[IL]WC[IL]GNA[IL]TSR, APE[IL]HME[IL]HR, AVDVEPANE[IL]YR, SAYDENP[IL]DADN[IL]TR, WGGA[IL][IL]E[IL]SQMQNGPEG[IL]K	5	VPHVSVRLKRCDPLLVLYNNNNSGFPTSSLPKSTPKTLSPAPDLAAAHRSPAAAMDMGAMNDPERLFFFDLACKTAKSAYDENPLDADNLTRWGGALLELSQMQNGPEGLKCLEDAESKLEEALRIDSNKADALWCLGNALTSRGFFTSDSIPANECFEKATGCFQKAVDVEPANELYRKSLELSSKAPELHMEIHRQIASQAAQAPPSSSNARQSKKKKDNDFWYDVGGWAILCVGFAAWIAMAKNQPQPAPQPPHM	1	1.01	1.028	1.032	1.004	1.03	0.94, 1.11, 0.99, 0.97, 0.99	0.93, 1.16, 0.99, 0.9, 1.07	1.07, 1.0, 1.07, 1.05, 0.95	1.13, 0.9, 1.09, 1.08, 0.96	0.98, 1.04, 1.0, 0.93, 1.07	1.15, 0.86, 1.09, 1.16, 0.89	0.0289828	0.0474342	0.0233238	0.0435201	0.0242074	0.0645755
p57656	TPM=1802.27 comp2_c0_seq3_g999	ADEVTAPGGAN[IL]PGGPR, ADEVTAPGGAN[IL]PGGPRPSDGGDR, S[IL]NDGEAVEYVVVHGDDGR	3	MGDRVEGTVKWFNVTKGFGFITQEDGGEDLFVHQSVIKADGYRSLNDGEAVEYVVVHGDDGRTKADEVTAPGGANLPGGPRPSDGGDRGGRGGGGYGGGGYGGGDRYGGGGGGYGGGG	1.03667	0.973333	1.03	0.996667	0.94	1.05667	1.01, 1.09, 1.01	0.97, 0.97, 0.98	1.07, 1.06, 0.96	1.07, 0.97, 0.95	0.96, 0.89, 0.97	1.11, 1.09, 0.97	0.0266667	0.00333333	0.0351188	0.0371184	0.0251661	0.0437163
p52808	TPM=19.71 TMHMM=6 comp7031_c0_seq2_g1254	ADNASSTVAVDS[IL][IL]NYETVK, [IL][IL]DGVSFSVPAGK	2	MRPSSRILAARHLLRGSRLQPSTAAAASCLLRRLDGTNGPPVPKPLTSPHLGGPGPNCISGTGRGAPFGRLNCLLPDSTYPPRSPRDLRGHAFSTSANAATVGKPADGNVRKDTPKKDIDDQIADSQILRSLWKYLMLNDSPDFRFRLVLSLGLLVGAKVINVQVPFLFKLAIDWLAAIGGAEASLASFTDANATLLALFASPAAVLIGYGIARSGVSACTELRNALFSKVTLRAIRSVSRTVFFHLHELDLRYHLSRETGALNRIIDRGSRAISYILTVMVFNIVPTIIEIGMVSGILAYSYGSSFAWITSVSVATYIAFTLAVTQWRTKFRQAMNKADNASSTVAVDSLLNYETVKYFNNEKFEVQKYDKYLKNYEDAALKTQSSLAYLNFGQSIIF…	1.045	1.105	1	0.96	1.04	0.94	0.96, 1.13	0.89, 1.32	0.97, 1.03	1.01, 0.91	0.92, 1.16	1.1, 0.78	0.085	0.215	0.03	0.05	0.12	0.16
p50300	TPM=36.5 TMHMM=1 SignalP=yes comp4593_c0_seq1_g172	ADPFVV[IL]Y[IL]K, DT[IL]EDT[IL]TWPNR, QEGGSNPFASQ[IL]Q[IL]TS[IL]EK, [IL]WPFVNEAASE[IL][IL]K	4	DLRQPLGSPRLSFLRIFSASSNRAQTPPKRARRSSTSRGGGGEAGWLAMAFLFGALLGLVLGVAVVMAFARLENSRAEQRRELAATVSSFSKLTVQDLKTLIPPEFYPSWVSFTQKQKLKWLNQELIKIWPFVNEAASELIKTSVEPVFEQYKSFILASIHFSKLTLGTVAPQFTGVQLLDSDSTSIIMELEMQWDGNPNIVLDIQTTLGISLPVQVKNIGFTGVLRLLFKPLVAELPCFGAVCVSLREKSKVDFTLKVVGGEMTAIPGISDAIEGTIRDTIEDTLTWPNRIIVPIVPGDYSDLELKPVGLLEVKLVEARDLKNKDLVGKSDPFAVLYIRPLSAKTKKSKTINNDLNPIWNEHYEFVVEDSSTQHLTVKIYDDEGLQPSEIIGCARVEL…	0.94	0.965	1.005	1.0725	1.0225	1.05	0.9, 0.94, 0.88, 1.04	0.98, 0.95, 0.82, 1.11	0.98, 0.98, 0.94, 1.12	1.1, 1.04, 1.07, 1.08	1.09, 1.01, 0.93, 1.06	1.0, 1.04, 1.15, 1.01	0.0355903	0.0595119	0.0394757	0.0125	0.0349702	0.0343996
p7044	TPM=242.11 Putative ortholog: Os02g33140 ribosomal protein, putative, expressed comp258_c0_seq1_g39	ADRDESSPYAAM[IL]ASQDVAVR, E[IL]G[IL]TA[IL]H[IL]K, [IL]EDVTPVPTDSTR	3	MSKRKTREPKEENVTLGPAVREGEHVFGVAHIFASFNDTFIHVTDLSGRETLVRITGGMKVKADRDESSPYAAMLASQDVAVRCKELGITALHIKLRATGGNKTKTPGPGAQSALRALARSGMKIGRIEDVTPVPTDSTRRKGGRRGRRL	0.973333	1.08333	0.946667	0.97	1.11333	0.88	0.92, 1.0, 1.0	1.0, 1.25, 1.0	0.76, 0.99, 1.09	0.83, 0.99, 1.09	1.09, 1.25, 1.0	0.76, 0.79, 1.09	0.0266667	0.0833333	0.0976957	0.0757188	0.0731057	0.105357
p10119	TPM=633.03 Putative ortholog: Os01g59990 ribosomal protein L24, putative, expressed comp209_c0_seq1_g654	ADSQVF[IL]FANSK, S[IL]VGAT[IL]EV[IL]QK	2	SSVFRTIFPHFPHPPPPRLPPRSRHLRKFSSAAKMVLKTELCRFSGQKIYPGKGIRFIRADSQVFLFANSKCKRYHHNKLKPAKLTWTAVYRKQHKKDIHAEAAKKRRRTTKKPYSRSIVGATLEVIQKKRAEKPEVRDAAREAALREIKERIKKTKDEKKAKKAEVTKSQKSQGKGAVQKGSKGPKLGGGGGKR	0.835	1.14	1.045	1.295	1.425	0.925	0.96, 0.71	1.01, 1.27	0.99, 1.1	1.04, 1.55	1.05, 1.8	0.99, 0.86	0.125	0.13	0.055	0.255	0.375	0.065
p145271	TPM=1.62 comp40324_c0_seq1_g472	ADVPAAEQDEVAQA[IL]YDR, SYTN[IL][IL]D[IL]AEGNFAA[IL]GPSGGGGR	2	MMSRSYTNLLDLAEGNFAALGPSGGGGRRRSGSFGMKRMSRVMTVPGTLSELDGEDDSEPAATNSVASDVPSSVSGERLLVVSNQLPILARRRPDGRGWSFTWDDDSLLLQLRDGVPDDMEVLFVGGVRADVPAAEQDEVAQALYDRFRCAAVFLPESLHDRFYHRFCKRTLWPLFHYM	0.965	0.94	1	1.035	0.975	1.065	1.03, 0.9	0.91, 0.97	0.98, 1.02	0.94, 1.13	0.88, 1.07	1.07, 1.06	0.065	0.03	0.02	0.095	0.095	0.005
p62638	TPM=47.23 comp3243_c0_seq1_g511	ADVTEPGAVTTP[IL]VR, SV[IL]DP[IL]VEE[IL]TK	2	VIRPLGSAPACNAEGADFHRGGDHQRSIWGVACREIFVHEATVDDGFLLEDDLVTVTAFEPLLVAVAVMVAVLHRVEVPDETEFANSKIESSGLSLSSLGAAILLPIRPLKPVLSLPSLSLKTVQIKINLGHPHGALGVEPDLAIDGTNDDRAIPGAREAVEVGAPRELMALRPVQHRRLRCGGADGLHPAPRVPHVPPAEPVVVQPQEGRPGGFELGALAVVGDVAHGDVGAVLLEAPLGDDLAGLDVDVVDAVGAGVAGAHEQHVGLAAHQEGLLGGGVGGGGAAAAAAAGDVDGDALPVHAVAEVLHDLDARAADEEAVVESAEGEALDAAAVAGLLLELLEEVSGGGRGRGEAVLGVGPDGVVGLGGGALSLVTQLGNDASIGRKFSYCLVNFFL…	0.925	0.94	0.94	1.01	1.01	1.01	0.87, 0.98	0.82, 1.06	0.87, 1.01	0.99, 1.03	0.94, 1.08	1.06, 0.96	0.055	0.12	0.07	0.02	0.07	0.05
p9286	TPM=79.47 Putative ortholog: Os01g71080 xylanase inhibitor, putative, expressed comp1508_c0_seq1_g388	ADVYAPFVK, AFDQAAASPNFSPFVSR, APAGAVGVAG[IL]APSSQSS[IL]PAQVAR, P[IL]VTA[IL]TK, TTSGNSVGVA[IL]FGGGP[IL]FF[IL]PSDR	5	MRNPKPFFIVISIWFFALWKCTSAGSGGKPLVTAITKDANSLLYTAPLKDGRPLVVDLSGPAITLACSSKTGTVTMLSASATDGANPLFPVSFSAAASCASKAPAGAVGVAGLAPSSQSSLPAQVARTQKVAKKVALCLPSDGKTTSGNSVGVAIFGGGPLFFIPSDRGDFTTMLAGTAPLHGFNGSPGYFLSATGIAVDRKKVPLSVSGPLVVGLSSTIPYTALRADVYAPFVKAFDQAAASPNFSPFVSRVAAVAPFERCYNSTKLSVGLSRLGYPVPQIELLLEGGQSFSVLGANSMVQVKANTACLGFARMKAAGGHQAPAAVIGGFQLENHLLVLDEEKKQFGFTTYLGAIGLSCSSFNFTRAA	1.008	1.052	1.06	1.056	1.054	1.01	0.92, 1.08, 1.11, 0.89, 1.04	1.09, 1.0, 1.04, 1.09, 1.04	1.13, 1.07, 1.24, 0.97, 0.89	1.22, 0.99, 1.12, 1.09, 0.86	1.18, 0.93, 0.94, 1.22, 1.0	1.04, 1.07, 1.19, 0.89, 0.86	0.0437493	0.0171464	0.0609918	0.0612046	0.0611228	0.0607454
p55133	TPM=36.28 TMHMM=1 SignalP=yes BigPI=yes comp9769_c0_seq3_g302	ADYDSCSASSPTTT[IL]K, FHPGDT[IL]VFK, TDYGSWVSSK	3	MAAAMRIALLAVAAMAALSAASAATYNVGEPEGAWDLRTDYGSWVSSKKFHPGDTIVFKYSAQAHDVLEVSKADYDSCSASSPTTTLKTGNDEVALNATGTRYFICGFTGHCTAGMKVAIDVVSASSPSTPSTPSTPSSPAPASGPSASNSPPPPSPSAATSVRVTAGLGLVVLLAGLMA	1.03333	1.05	1.02667	0.993333	1.01	0.99	1.12, 1.03, 0.95	1.26, 1.03, 0.86	1.11, 1.04, 0.93	0.99, 1.01, 0.98	1.12, 1.0, 0.91	0.88, 1.01, 1.08	0.0491031	0.115902	0.0523874	0.00881917	0.0608276	0.0585947
p3435	TPM=218.95 TMHMM=4 Putative ortholog: Os01g68324 dolichyl-diphosphooligosaccharide--protein glycosyltransferase 63 kDasubunit precursor, putative, expressed comp344_c0_seq1_g665	AE[IL]G[IL]AENDAGTSESVEK, APRPPAQAVDP[IL]AK, FF[IL]G[IL]G[IL]PGSAK, GFTSFANVVSGK, SYDDGTFYFDEK, VEVTTVFGSAAPP[IL]R, VFVP[IL][IL][IL]S[IL]PSK, VN[IL]VQV[IL]GSDSK	8	TLPRSRPRTRENICSRPLPSTSGRSGHSHPPSLLNPSSSPPLRPAPTAASAMAWGLPPLAVLLLLAVIVAPLSSAVRPVSDAHRSAAAELFAALPDGSLGDLETTYEAVSTFKILVVQKDKSLDGKACKLASDTLSSSSSSAKDLFHAARISGVLGCSIDAGVYDDVASRLKAVIKDTNSLLEFYYSVGGLLSLKEQGHSVVLSDADSIFHAIKALSQSDGRWRYDTNSAESSTFAAGIALEALAGVVSLSDAEVDPSMIGVVKNDIVKLFGTIKSYDDGTFYFDEKNVDATEYKGPITTSASVVRGFTSFANVVSGKLNIPGEKILGLAKFFLGIGLPGSAKDCFNQIKSLSLLENNRVFVPLILSLPSKVLSLTSKDQLKVEVTTVFGSAAPPLRVN…	1.05875	1.09	0.98375	0.93375	1.03	0.91	1.14, 1.03, 1.03, 0.96, 1.04, 1.18, 1.01, 1.08	1.23, 1.0, 1.04, 0.94, 0.97, 1.14, 1.21, 1.19	1.04, 0.91, 1.0, 0.92, 0.87, 1.05, 1.03, 1.05	0.91, 0.88, 0.97, 0.97, 0.84, 0.89, 1.03, 0.98	1.08, 0.97, 1.01, 0.98, 0.93, 0.97, 1.2, 1.1	0.85, 0.91, 0.96, 0.99, 0.9, 0.93, 0.85, 0.89	0.025315	0.0409704	0.0256304	0.0224354	0.0317355	0.0174233
p9560	TPM=48.71 Putative ortholog: Os05g44310 vesicle-fusing ATPase, putative, expressed comp1931_c0_seq1_g962	AED[IL]DAV[IL][IL]AQQ[IL]R, D[IL][IL]DEA[IL][IL]RPGR, ESSF[IL]SPDVN[IL]QE[IL]AAR	3	ASHGSLASSPPLPPRGSSTPHDPPARSLSRCGAAMAGRGYQGGGGASATMAVVSTPSQELALTNCAYVSTADIRRFPNALALVGDVLVFALRAHDAVAGGSIALNAIQRRQAKVSAGDSITVSSFAPPDGFKLALLTLELEYTKARSNRAEDLDAVLLAQQLRKRFMDQVMTTGQRVPFEFYGTNYIFTVNQALLEGQESSTPLDRGFLSSDTYIIFEAAPNSGIKVINQKEAASSKLFKHKEFNLEKLGIGGLSNEFTDIFRRAFASRVFPPHVVNKLGIKHVKGMLLYGPPGTGKTLMARQIGKLLNGKDPKIVNGPEVLSKFVGETEKNVRDLFLDAENEQKAQGDHSDLHVIIFDEIDAICKSRGSSRDGTGVHDSIVNQLLTKIDGVEALNNVL…	1.04667	0.943333	1.03333	0.986667	0.906667	1.09667	1.01, 0.96, 1.17	0.98, 0.92, 0.93	1.04, 0.93, 1.13	1.02, 0.97, 0.97	0.97, 0.96, 0.79	1.06, 1.01, 1.22	0.0633333	0.0185592	0.0578312	0.0166667	0.0584047	0.0633333
p6807	TPM=33.74 Putative ortholog: Os03g02150 adapitin protein, putative, expressed comp1566_c0_seq1_g1053	AEDAEVDTAEQSA[IL]K, AQVQ[IL]PVEFTN[IL]R, A[IL][IL][IL]PPSHFK	3	MLGYDVDFGHMETVSLISAPKYPEKQVGYIVTSCLLNENNDFLRMVINTVRNDIIGRNETYQCLALTMVGNIGGKEFSESLAPDVQKLLISSSCRPVVRKKAALCLLRLYRKNPDVVNIDGWSDRMAQLLDERDLGVLTSVMSLFVSLVSNNAEAYWNCLPKCVRILERMARNQDIPQEYTYYGIPSPWLQVKAMRALQYFPTIEDPSARRALFEVLQRILMGTDVVKNVNKNNASHAVLFEALALVMHLDAEKEMMSQCVALLGKFIAVREPNIRYLGLENMSRMLLVTDVQDIIKRHQAQIITSLKDPDISIRRRALDLLYGMCDVTNAKEIVEELLQYLNTAEFAMREELALKAAILAEKFAPDLSWYVDVILQLIDKAGDFVSDDIWYRVVQFVT…	0.956667	0.986667	1.09	1.14667	1.04	1.11	1.0, 1.04, 0.83	1.03, 0.92, 1.01	1.15, 1.07, 1.05	1.15, 1.03, 1.26	1.03, 0.88, 1.21	1.12, 1.17, 1.04	0.0643774	0.0338296	0.0305505	0.0664162	0.0953939	0.0378594
p13596	TPM=39.69 Putative ortholog: Os01g67740 chromosome segregation protein, putative, expressed comp2275_c0_seq1_g146	AEDEYND[IL][IL]SK, DSSTATA[IL]EVAAGGR, [IL]QQ[IL][IL]SDSNVER	3	MHIKEVCLEGFKSYAGRTVVPGFDPLFNAITGLNGSGKSNILDSICFVLGITDLRQVRAASLQELVYKQGQAGVTKATVSIVFDNSDRARSPLGYEDSAEITVTRQIVVGGRNKYLINGHLAQPSRVQTLFHSVQLNVNNPHFLIMQGRITKVLNMKPPEILSMLEEAAGTRMYEMKKESALKTLEKKQNKVEEINKLLDDEILPALEKLRKERCQYMKWANGNTELDRLKRFCIAYEFVQAEKVRESALSGVNQIRAKIVELDESTEKLNGEIHEMDKNIATLAAEKEAKLGGEMKVLSEKVDKIQHALIKETSLMNNEEETLRSEEKAADKILKSIEDIKRSIVERDAAVKKAEDGASDMSKRAEDLTKELDESEKEYQGVLAGKSSANEKKCLEDQ…	0.966667	0.983333	1.01667	1.05667	1.02	1.03667	0.9, 1.12, 0.88	1.01, 1.07, 0.87	1.02, 1.09, 0.94	1.13, 0.97, 1.07	1.12, 0.95, 0.99	1.01, 1.02, 1.08	0.0768838	0.0592546	0.0433333	0.0466667	0.051316	0.0218581
p8222	TPM=1802.27 Putative ortholog: Os01g36570 glycine-rich protein 2, putative comp2_c0_seq2_g1003	AEDVTAPGGGT[IL]PGGPR, AEDVTAPGGGT[IL]PGGPRPGGDDR, S[IL]NENE[IL]VEFV[IL]SSGDDGR	3	MSERKTGSVKWFNSTKGFGFITPENGGEDLFVHQSALKCDGFRSLNENELVEFVISSGDDGRTKAEDVTAPGGGTLPGGPRPGGDDRGGRGGGGYGGGGGYGGGGGYGGGDRYGGGGGGGYGGGGGGYGGGVGGYGGDRGGGGYGGDRGGGYGQGGGGGYGGQRGGGGYGGGGGYGGGGGGGDRWN	1	0.976667	1.02667	1.02667	0.98	1.05	1.0, 1.01, 0.99	0.98, 0.92, 1.03	1.07, 1.0, 1.01	1.07, 0.99, 1.02	0.98, 0.91, 1.05	1.09, 1.08, 0.98	0.0057735	0.031798	0.0218581	0.0233333	0.0404145	0.0351188
p2435	TPM=606.25 TMHMM=1 Putative ortholog: Os04g32950 calreticulin precursor protein, putative, expressed comp226_c1_seq1_g122	AEEAANAPSEE[IL]SE[IL]QK, ANF[IL]SSDDFEPA[IL][IL]PSK, DGTVV[IL]QFEVR, EFDNGTPYT[IL]MFGPDK, WHAPM[IL]DNPSYK, [IL]AF[IL]PF[IL]EPYK, [IL]QNG[IL]ECGGAY[IL]K, [IL]SHVYTA[IL][IL]KPDNE[IL]R	8	MTGARALLLPLLVISALFAQIRASDPLFHETFDESFEGSWVVSGKEEYTGVWKHAKSDGHEDYGLLVSEPAKKYAIVKELDNPVTLKDGTVVLQFEVRLQNGLECGGAYIKYIRVQDTGLDTKEFDNGTPYTIMFGPDKCGSTNKVHFILKHKNPKTGEYVEHHLKSPPSVPYDKLSHVYTAILKPDNELRILIDGEEKSKANFLSSDDFEPALIPSKTVPDPDDKKPEDWDERAKIPDPDATKPDDWDEDAPMEIVDEEATKPEGWLDDEPDEIDDPEAAKPEDWDDEEDGEWEAPKIDNPKCEEAPGCGEWKKPMKQNPAYKGKWHAPMIDNPSYKGIWKPQEIPNPEYFELDKPDFDPIAAIGIEIWTMQDGILFDNILIADDEKVATSILEKTWK…	1.0775	1.18125	1.025	0.9525	1.09625	0.87	1.04, 1.07, 1.18, 1.04, 1.0, 0.99, 1.25, 1.05	1.16, 1.19, 1.28, 1.11, 1.04, 1.16, 1.4, 1.11	1.03, 1.05, 1.11, 1.02, 1.0, 0.94, 1.08, 0.97	0.99, 0.98, 0.94, 0.97, 1.0, 0.94, 0.87, 0.93	1.11, 1.11, 1.08, 1.07, 1.04, 1.17, 1.12, 1.07	0.89, 0.89, 0.87, 0.91, 0.95, 0.81, 0.77, 0.87	0.0320574	0.0397958	0.0197303	0.0148504	0.0141342	0.02
p7813	TPM=60.7 Putative ortholog: Os01g06600 glutaryl-CoA dehydrogenase, mitochondrial precursor, putative, expressed comp1164_c1_seq1_g124	AEFPFHA[IL]PK, E[IL][IL]GGNG[IL][IL]ADF[IL]VAK	2	MGYPGSSRGGEEGESEDGGKVGLPALEVSLAFPQATPASLFPPAVSDYYQFDDLLTDEEKALRKKVRAISEKEIAPIMTEYWEKAEFPFHAIPKLATLGLAGSTTKGYGCPGLSVTASAISIAEVARVDASCSTFILVHSSLAMSTIALCGSEAQKQKYLPSLAQLKTVGCWALTEPDYGSDASALKTSATKVPGGWQLDGQKRWIGNSTFADVLVILARNADTKQLNGFIVKKGAPGLKATKIQNKIGLRMVQNGDILLNKVFVPEEDRLTGINSFQDISKVLAMSRIMVAWQPIGISMGVYDMCHRYLQERKQFGAPLAAFQLNQEKLVRMLGNIQAMVLVGWRLCKLYESGKMTPGHASLGKAWISSKSREVVSLGRELLGGNGILADFLVAKAFC…	1.01	1.095	1.08	1.07	1.09	0.98	1.03, 0.99	1.11, 1.08	1.06, 1.1	1.03, 1.11	1.08, 1.1	0.95, 1.01	0.02	0.015	0.02	0.04	0.01	0.03
p60402	TPM=968.63 comp97_c4_seq3_g769	AES[IL][IL]E[IL]MEGDD[IL]K, ENVKPS[IL]FTYK, VYANQN[IL][IL]DK, [IL]ADV[IL]AMMEK, [IL]GVST[IL]DS[IL]VK	5	MWALRRAGNPLRVSARQVASVRGCASLEVLLSADAKTAEERCGQGCQKSCCCRQPKPSASRSSFSSGWSMWGRGFSSQAGENSGDKDDDLEEGFSDLEVPPEADKKEVESASEESSDEDAVDEIDSLGVDADAKPEKETVKRASQSPLLKVLLEAPRNDVATSLKKWVDAGNTFDRSDVFYVILNLRKRRFFAKALQLLEWLEESKQIDLIERDYASRLDLMAKVNGVYRAEKYIDNIPASHRGEVVYRTLLANCVAEVNVRKAEEVFNKMKDLGFPVTVFAINQLLLLYKRVDKKKIADVLAMMEKENVKPSLFTYKLLVDTKGASRDFEGMEKVVESMQADGIEPDILLQATLAKHYIFGGHREKAESILELMEGDDIKANRNACHVVLPLYGFLGK…	0.95	1.038	0.952	1.004	1.096	0.952	0.96, 0.94, 0.91, 0.98, 0.96	0.7, 1.31, 0.98, 1.1, 1.1	0.95, 1.16, 0.92, 0.86, 0.87	0.99, 1.23, 1.02, 0.88, 0.9	0.73, 1.39, 1.08, 1.13, 1.15	1.36, 0.89, 0.94, 0.78, 0.79	0.0118322	0.0998198	0.0545344	0.0623378	0.106	0.106367
p17692	TPM=44.4 Putative ortholog: Os03g07570 aminotransferase, putative, expressed comp4171_c1_seq1_g69	AETAV[IL]FEK, MQY[IL]YDEQGK, [IL]KD[IL]GV[IL]VGK	3	MASSLLRRAAAGRGRFPSPADVLRRLVSSEAAPEQALPRPLPEMPPFDHRPAPYAGMGGDEILAKRKKFLGPSLFYYYQKPLNIVEGKMQYLYDEQGKRYLDCFGGIVTVSCGHCHPDIVNAVLDQTKLLQHTTTIYLHHAIVEFAEALASKMPGNLKVVYFVNSGTEANELAMLMARLYSGNLSMVALRNGYHGGSAGTIGLTGLQTWKYPIPQGEIHHVMNPDPYRGAFGSDGAAYAKEVEEHINYGSSGRVGGFIAETFQGVGGAVELAPGYLKSVYDTVRKAGGVCIADEVQSGFGRTGSNYWGFQTQDVIPDIVTMAKGIGNGLPLGAVVTTPEIASVMAQKIQFNTFGGNPVCSAGGLAVLKVLDKEKRQAHCADVGAHLVERLKTLQQKHEI…	0.946667	1.04667	0.94	0.993333	1.10667	0.913333	0.93, 0.95, 0.96	1.09, 0.92, 1.13	0.94, 1.03, 0.85	1.02, 1.08, 0.88	1.17, 0.97, 1.18	0.87, 1.12, 0.75	0.00881917	0.0643774	0.0519615	0.0592546	0.0683943	0.108985
p9016	TPM=279.56 Putative ortholog: Os03g46660 glucan endo-1,3-beta-glucosidase precursor, putative, expressed comp987_c0_seq1_g1233	AEVAAQ[IL]QQ[IL][IL]GF[IL]SR, AYVSN[IL]VAH[IL]R	2	SGVAAAAAIKFSTVNTMAVLAQSDPPSTGAFRAEVAAQLQQILGFLSRTGAPFMVNPYPYFAYQSDPRPDTLAFCLFQPNAGRLDAGSKIRYANMFDAQVDAVKSALGRAGYGAVDIVVAETGWPTKGDPTEAGATVDNARAYVSNLVAHLRSGAGTPLMPGKPVDTYLFALYDEDLKPGAASERSFGLYHTDLTMAYDAGLTTTTSGGGGAATPSNGAGASVQPKGGSGWCVASAAATDAQLQTDMDYACSQVGVDCAAIQPGGACFQPNTVRAHAAYAMNQLYQAAGGHPWNCDFRQSATLTSSNPSYGSCVFTGGQ	1.02	1	1.015	1	0.99	1.01	1.08, 0.96	1.04, 0.96	1.13, 0.9	1.05, 0.95	0.97, 1.01	1.08, 0.94	0.06	0.04	0.115	0.05	0.02	0.07
p58931	TPM=50.17 comp1696_c0_seq2_g1534	AEVADVSEAVHQR, [IL]ES[IL]DS[IL]TN[IL]EE[IL][IL]R, [IL]TFSDDMESN[IL]NR	3	MAAAHSLLRLSAPAPASAHPPLGAALSLLRLLPARRPHRLVASCSSALPDLAAFPNPNGLLVAEPAEPAISQVATETELRENGPRSTRRTKLVCTVGPATCGPAELEALAVGGMNVARLNMCHGDRDWHRKVIHAVRRLNEDKGYAIAVMMDTEGSEIHMGDLGGAPAAKAEDGEIWTFSVRSFEAPLPELTVHVNYEGFAEDVRVGDDLLVDGGMARFEVVEKLGPDVKCRCTDPGLLLPRANLTFWRDGSVVREKNAMLPTITSKDWLDIDFGIAEGVDFIAVSFVKSAEVINHLKSYIAARSRGSDIAVIAKIESIDSLTNLEEIIRASDGAMVARGDLGAQIPLEQVPSIQQKIVKLCRQLNKPVIVASQLLESMIEYPIPTRAEVADVSEAVHQ…	1.01333	0.99	1	0.99	0.983333	1.01	1.08, 0.98, 0.98	0.9, 1.03, 1.04	1.0, 0.93, 1.07	0.92, 0.95, 1.1	0.84, 1.05, 1.06	1.1, 0.9, 1.03	0.0333333	0.0450925	0.0404145	0.0556776	0.0717248	0.0585947
p26599	TPM=19.04 Putative ortholog: Os05g46290 T-complex protein, putative, expressed comp11080_c0_seq1_g1357	AEYVDM[IL]K, AVAAGVNVMD[IL]R, CEMENP[IL][IL][IL][IL]HDK, EG[IL]VPGGGVA[IL][IL]YATK, MPDMSGMGF, T[IL]DNE[IL]EAVQGMK, VE[IL]QM[IL]GTAK	7	GRNVIIERPNRSPKVTKDGVTVAKSIEFKDSAKNVGANLVKQVADATNKVAGDGTTCATVLTQAIVTEGCKAVAAGVNVMDLRKGINKAIDAVIAHLKSKAWMIDSPEEINQVATISANGEKEIGDLISKAMGIVGKDGVITIVDGKTLDNELEAVQGMKLSRGYISPYFVTDLKTQKCEMENPLILIHDKKIVNMNSLLPVLQISIQKKRPLLIFADVEGEALSMLVLNKHRAGLKICAVKAPGFGENRKANLDDLAVLTGGQVVSEDQGLDLSKVELQMLGTAKKVTISLDDTIILDGGGDKLQIEERCQQLRESFEDSTAVFDKEKAQERLAKLSGGVAVLKIGGASEAEVGEKKDRVTDALNAARAAVKEGIVPGGGVALLYATKELDKISTSHE…	0.957143	0.971429	0.998571	1.05714	1.00429	1.08143	0.88, 0.94, 1.22, 0.97, 0.76, 0.98, 0.95	1.02, 0.8, 1.37, 1.11, 0.6, 0.88, 1.02	1.02, 0.95, 1.13, 1.0, 0.93, 1.08, 0.88	1.16, 1.02, 0.93, 1.03, 1.22, 1.1, 0.94	1.16, 0.85, 1.12, 1.14, 0.79, 0.9, 1.07	1.0, 1.2, 0.83, 0.9, 1.54, 1.23, 0.87	0.0523138	0.0923871	0.0329089	0.0410989	0.057935	0.0968413
p52716	TPM=23.0 TMHMM=1 SignalP=yes comp6885_c0_seq1_g327	AF[IL]AYNHNDPPYQA[IL]YR, DD[IL]VGVGWNVK	2	MAPLSKLIQYSQLLSILLLLAAATATMQQVAAAADELKGRPRQGMGRPGCRDKCGSMSIPFPFGMDKPGCFLPGFEVTCNTSFSPPRAFLAYNHNDPPYQAIYRCKFGTDTSGCKYTYQPVELFGISLETNEVRVYGGVTSRCFTSETAGLTKGQYMELDRAGPFLLSPRDDLVGVGWNVKSSMSYQIKPYPDLLSCTSNDPFRVTAPTGSCSGLGCCRVALPPPWPTMPVIETAVILEEVNAGANNFWKTNPCSYGMVVEGSWYNFTAEDMAGYEVLSKKLTRGFPLVLDFAIRNGSCQRDGCPSGNSSCANAAYDSEGYVCKCKEHYHGNPYIANGCQAVNMHM	1.015	0.98	1.045	1.03	0.965	1.075	1.03, 1.0	0.9, 1.06	1.12, 0.97	1.09, 0.97	0.87, 1.06	1.24, 0.91	0.015	0.08	0.075	0.06	0.095	0.165
p13680	TPM=41.83 Putative ortholog: Os01g03760 expressed protein comp3432_c0_seq1_g325	AFANVSAAQFPWAK, D[IL]V[IL]Q[IL][IL]ER, QAAQQ[IL][IL]P[IL]AVK	3	ADGSIAAWGARSDDDEYGSDSDEAAKPQPEEVKKPKKPKVKKPKVSIADAAALIDAENLAAHLIEVSASYENQEGIQLMRFADYFGRAFANVSAAQFPWAKMFKESPMSKMVEVPLNHVPEPVCKTASDWINQRSSDALGEFVVWCIDSIMSELSGQPLGVKGSKKVVQQTPKAQVAIFVVLALTLRRKPDVLVNLFPKIVGNSKYLGQEKLPIIAWVINQASQGDLVSGMFYWSHSLFPALCAKSGNPQSRDLVLQLLERFLTTPNASKARGILLNGAVRRGERLVPAGTFDLFMRGAFPVPNARVKATERFEAAYPIIKELALAGPPGSKTVRQAAQQLLPLAVKAMQEKNAELSREAADIFIWCLTQSPECYKQWDKFHPENIGASVVVLSKIAAD…	0.93	0.906667	1.01333	1.09	0.976667	1.13333	0.97, 0.9, 0.92	0.96, 1.03, 0.73	1.1, 1.02, 0.92	1.13, 1.14, 1.0	0.99, 1.15, 0.79	1.15, 0.99, 1.26	0.0208167	0.0906152	0.0520683	0.0450925	0.104137	0.0783865
p9328	TPM=182.54 Putative ortholog: Os02g32120 cytochrome b-c1 complex subunit Rieske, mitochondrial precursor, putative, expressed comp790_c0_seq1_g480	AFAYFV[IL]SGGR, NQDVG[IL]AEVPATTAA[IL]K, [IL]ANSVDVAS[IL]R, [IL]ANSVDVAS[IL]RDPQEDAVR	4	LPLLFLLSSLLILRYASPPCVVVSSSLGWLESISPSPPNPTTPESRRGDDQGQAASPTVTMLRVAGRRISSHLAWRPAAAASTARSPLAGGLLGDDSSRDHKPCFAVQSPFYAAARGFSAETLVPRNQDVGLAEVPATTAALKNPSAKIVYDEYNHQRYPPGDPSKRAFAYFVLSGGRFVYASLLRLLVLKFVLSMSASKDVLALASLEVDLSSIEPGTTVTVKWRGKPVFIRRRTEDDVKLANSVDVASLRDPQEDAVRVKNPEWLVVIGVCTHLGCIPLPNSGDFGGWFCPCHGSHYDISGRIRKGPAPYNLEVPTYSFLEDNKMLIG	1.0025	0.98	1	1.005	0.98	1.035	0.97, 1.07, 1.04, 0.93	0.98, 1.26, 0.85, 0.83	0.97, 1.12, 0.88, 1.03	1.01, 1.05, 0.85, 1.11	1.02, 1.18, 0.82, 0.9	0.99, 0.89, 1.03, 1.23	0.0319831	0.0990791	0.0504975	0.0556028	0.0783156	0.0713559
p7055	TPM=171.77 Putative ortholog: Os08g09940 GTP-binding protein, putative, expressed comp867_c0_seq1_g87	AFEDSD[IL]TH[IL]DDTVDPVR, APQAAGA[IL]HTDFER, GASAGEG[IL]GNAF[IL]SH[IL]R	3	PHARRNNHFPPKTLARSSDSSPQLAASPPTPMPPKAKKDAAPAERPILGRFSSHLKIGIVGLPNVGKSTFFNIVTKLSIPAENFPFCTIEPNEARVNVPDERFDWLCKLFEPKSEVSAYLEINDIAGLVRGASAGEGLGNAFLSHIRAVDGIFHVLRAFEDSDITHIDDTVDPVRDLDTISQELRLKDIEFVQAKIDDLEKSMKRSNDKQLKIEHELCQRIMAHLQDGKDIRLGDWKTLEIEVLNTFQLLTAKPVVYLVNMSEKDYLRKKNKFLPKIHAWVQEHGGETIIPFSCAFEQKLVDMPEDEAAKYCAENQTVSLIPKIIKTGFSAIHLIYFFTAGHGEVKCWQIRKQSKAPQAAGAIHTDFERGFICAEVMKFEDLKELGTESAVKAAGKYRQ…	1.01	0.916667	0.953333	0.943333	0.91	1.04	0.94, 1.13, 0.96	0.91, 0.98, 0.86	0.93, 1.04, 0.89	0.98, 0.92, 0.93	0.97, 0.87, 0.89	1.02, 1.06, 1.04	0.0602771	0.034801	0.0448454	0.0185592	0.0305505	0.011547
p9370	TPM=1170.59 Putative ortholog: Os11g03400 ribosomal protein, putative, expressed comp76_c0_seq1_g617	AFEP[IL]M[IL]AGR, VNGAP[IL]E[IL][IL]RPEM[IL]R	2	RPLAAITCLRRHSSSRIKPPPPRSPPSTTATMSAVLTRPTPGTVQCFGRKKTAVAVAYTKPGRGLIKVNGAPIELIRPEMLRLKAFEPIMLAGRSRFKDIDMRIRVRGGGKTSQIYAIRQAIAKALVAYYQKYVDEAAKKEVKDIFGRYDRTLLVADPRRCEPKKFGGRGARARFQKSYR	1.09	1.005	0.97	0.905	0.935	0.965	1.21, 0.97	1.01, 1.0	0.95, 0.99	0.79, 1.02	0.84, 1.03	0.94, 0.99	0.12	0.005	0.02	0.115	0.095	0.025
p19037	TPM=22.85 Putative ortholog: Os02g02210 aminotransferase, putative, expressed comp6018_c0_seq1_g779	AFFTNSGSEANDSQVK, FH[IL]PGETEEEFATR, GVG[IL][IL][IL]GTEFADNK, [IL]ANN[IL]EN[IL][IL][IL]K	4	MLAPFTAGWQSSDVHPLIIDRSEGSYVYDNNGNKYLDSLAGLWCTALGGSEPRLVKAATDQLNKLPFYHSFWNRTTKPTLDLADDLLSMFTARKMGKAFFTNSGSEANDSQVKLVWYYNNALGRPDKKKFIARSKAYHGSTLISASLTGLPALHQKFDLPAPFVLHTDCPHYWRFHLPGETEEEFATRLANNLENLILKEGPETIAAFIAEPVMGAGGVIPPPKTYFDKVQAVVKKYDILFIVDEVITAFGRLGTMFGSDMYNIKPDLVTLAKALSSAYVPIGATLVSPEIADVIDSQSNKLGSFAHGFTYSGHPVACAVAIEALKIYRERNIPDHVKQIAPRFQEGTKAFAGSPIVGEIRGVGLILGTEFADNKSRDSPFPAEWGVGAIFGQECQKRG…	0.9625	1	1.0225	1.065	1.0425	1.035	0.92, 1.04, 0.97, 0.92	1.03, 0.89, 1.16, 0.92	0.98, 0.98, 1.05, 1.08	1.06, 0.94, 1.09, 1.17	1.12, 0.86, 1.2, 0.99	0.95, 1.1, 0.91, 1.18	0.0283945	0.0612372	0.02529	0.047697	0.074652	0.0633114
p8861	TPM=142.44 Putative ortholog: Os01g37800 ras-related protein, putative, expressed comp844_c0_seq1_g1011	AFMTMAAE[IL]K, A[IL]ADE[IL]G[IL]PF[IL]ETSAK	2	TTGRVPGGGGMRGRGLDSTRRAPLDYPETQPFLFHLPFLSSRVPSPTPTFSPNSHPPRHRSSPSKSPARRRPSLAGPPRTTATVAAMNPEYDYLFKLLLIGDSGVGKSCLLLRFADDSYLESYISTIGVDFKIRTVEQDGKTIKLQIWDTAGQERFRTITSSYYRGAHGIIVVYDVTDQESFNNVKQWLNEIDRYASENVNKLLVGNKCDLAESRVVSYETGKALADEIGIPFLETSAKDATNVEKAFMTMAAEIKTRMASQPAANASKPATVTMKGQPVAQQNGCCSS	0.955	1.16	0.975	1.02	1.21	0.845	0.96, 0.95	1.04, 1.28	0.94, 1.01	0.98, 1.06	1.08, 1.34	0.9, 0.79	0.005	0.12	0.035	0.04	0.13	0.055
p4944	TPM=27.77 TMHMM=1 Putative ortholog: Os05g42010 TraB family protein, putative, expressed comp6203_c0_seq1_g1477	AFPS[IL]MET[IL][IL]HER, NWQQP[IL]EVQS[IL][IL]E[IL]PVTR	2	PPRHHHLRLPASPIPGRPRFRRRPPLSACPAQTPTTTAARRLAPLVLLMDPAAPVPAPAETNGEYADDWEFADAEAGSEPGMTPGGDQPRELPEELARGVVCLDCVTSPEALEAGQDPTCRVYLVGTAHVSQESCDQVKAVIDYLKPQVVFLELCQSRITILKPQNLQVPTLNEMIDMWKNKKMNTFGILYSWFLAKVASQLDVLPGAEFRVGYEEAMKYGGKVVLGDRPVQITLRRTWGMMSLWHRTKFLYYIIFQSLFLPSPEDLNKMLKDMDDVDMLTLVIQEMSKAFPSLMETLLHERDMYMSSTLLNVAREHSSVVAVVGKGHVSGIKKNWQQPIEVQSLLELPVTRQGPSKMKILASVGAISAVIASGIYIWGKK	0.975	0.9	0.905	0.925	0.92	1.01	1.03, 0.92	1.01, 0.79	0.94, 0.87	0.91, 0.94	0.98, 0.86	0.93, 1.09	0.055	0.11	0.035	0.015	0.06	0.08
p13530	TPM=80.1 Putative ortholog: Os12g41500 rhodanese-like domain containing protein, putative, expressed comp2269_c0_seq2_g1337	AFSAAVSS[IL]G[IL]YNK, ASGYDVESSASSDA[IL][IL]K, EN[IL]DTQTHQ[IL][IL]DAR, NEPVVSAEW[IL]HAN[IL]R, VWV[IL]DGG[IL]PQWR	5	ARCNATSSSAVSEAAAAATSGVHAVPRNEPVVSAEWLHANLRDPDVKVLDASWYMPAEQRNPLQEYQVAHIPGALFFDVDGISDRASSLPHMLPSEKAFSAAVSSLGIYNKDGIVVYDGKGLFSAARVWWMFRAYGHDKVWVLDGGLPQWRASGYDVESSASSDAILKASAASEAIEKVYQGQSVGPSTFEAKLQPHLLWNLDQVKENIDTQTHQLIDARGKPRFDGAVPEPRKGIRSGHVPGSKCVPFPQVLDSSQKLLPADELRKRFEQEGIPLDQPLVTSCGTGVTACVLALGLHRLGRTDVAVYDGSWTEWGAHPDTPVATAV	0.998	1.004	1.006	1.008	1.008	1.01	0.97, 1.03, 1.0, 0.98, 1.01	1.02, 1.0, 1.12, 0.98, 0.9	1.03, 1.03, 0.98, 0.98, 1.01	1.06, 1.0, 0.98, 1.0, 1.0	1.06, 0.97, 1.12, 1.0, 0.89	1.01, 1.03, 0.88, 1.0, 1.13	0.0106771	0.0354401	0.011225	0.0135647	0.0391663	0.0398748
p3759	TPM=6096.42 TMHMM=1 SignalP=yes Putative ortholog: Os03g57960 cupin domain containing protein, expressed comp3_c1_seq1_g104	AFSDEV[IL]QAAFNSR, AF[IL]QPSHYDADE[IL]FYVK, FEEFFP[IL]GGQGMESFFR, GE[IL]WQASEEQ[IL]R, GYFEMACPHK, MHM[IL]TGDECR, PYHFGEESFR, S[IL]PSQKP[IL]YSNNR, VAC[IL]DAAPR, VVM[IL][IL]NPVATPGR, V[IL]GAQTESVF[IL]R	11	MKTVARSSLLALALVLSLCLSLAFASREEVGWRRGEEEGRREEWGKGQSSSEGGRPYHFGEESFREWARTRHGHFKVLERFDDELLRGSVGDYRVACLDAAPRAFLQPSHYDADEIFYVKEGEGVLVVLRKGRRESFCVKEGDVMVIPAGSIVYSANTHRSRWFRVVMLLNPVATPGRFEEFFPIGGQGMESFFRAFSDEVLQAAFNSRREELESMRGQSKGEIWQASEEQIRELSRSCSRGGRGGGGSGSSKEEEIKPRSLPSQKPLYSNNRGRMHMITGDECRHLRDLDMEVGIANITRGSMLAPGYSTRATKIVVVVEGRGYFEMACPHKTGTDSGRSERRERGEHGREEEGETEQKKSRGYRQVRAQIKEGSVIVLPAGHPATFVAGNEGNLAVI…	1.00727	1.01727	0.973636	0.971818	1.01636	0.957273	0.97, 0.9, 0.97, 1.07, 0.99, 1.1, 0.96, 0.96, 0.95, 1.13, 1.08	1.0, 0.99, 0.88, 0.97, 1.19, 1.17, 1.08, 1.1, 1.01, 0.91, 0.89	0.95, 0.89, 0.9, 0.89, 1.07, 1.09, 1.01, 1.05, 1.11, 0.91, 0.84	0.98, 0.98, 0.93, 0.83, 1.08, 0.99, 1.05, 1.1, 1.17, 0.8, 0.78	1.03, 1.1, 0.91, 0.91, 1.2, 1.07, 1.13, 1.15, 1.06, 0.8, 0.82	0.95, 0.89, 1.02, 0.91, 0.9, 0.93, 0.94, 0.95, 1.1, 0.99, 0.95	0.022405	0.0321669	0.028676	0.0383955	0.0409495	0.0182453
p11545	TPM=40.04 Putative ortholog: Os02g08490 chaperone protein clpB 1, putative, expressed comp2568_c0_seq1_g1141	AG[IL]DNTSV[IL]QATDDF[IL]SR, A[IL]D[IL]VDEAAAK, EEVTDTD[IL]AE[IL]VSK, EYGDEFVSVEH[IL][IL]R, ME[IL]TTKP[IL]E[IL]DEVDR, QQ[IL]VESEH[IL]MK, VSGDTSGPVVGPS[IL]VS[IL][IL]DNAR, V[IL]GQD[IL]AVQSVANA[IL]R, V[IL]QQMVENE[IL]A[IL]GV[IL]K, YGT[IL][IL]S[IL]QK, [IL]DEY[IL]VFQP[IL]DSTE[IL]NR, [IL]EAE[IL]ES[IL]K, [IL]E[IL]GNTE[IL]VAND, [IL]SDGA[IL]VAAAV[IL]SDR, [IL]VGAPPGYVGYEEGGQ[IL]TEAVR, [IL][IL][IL][IL]EDV[IL…	16	MFHSTPPARYSASGSSSQIAPGEFTEMAWEGVIDAVEAARLSKQQIVESEHLMKALLEQKDGLARRIFSKAGIDNTSVLQATDDFISRQPKVSGDTSGPVVGPSIVSILDNARKHKKEYGDEFVSVEHLLRAFTADKRFGQQLFKDLKIDENELKEAISAVRGSQRVTDQNPEGKFQALEKYGIDMTELARRGKLDPVIGRDDEVRRCIQILCRRTKNNPVIIGEPGVGKTAIAEGLAQRIVRGDVPEPLQNRKLISLDMGALLAGSKYRGDFEERLKAVLKEVTASNGQIILFIDEIHTVVGAGATGGAMDASNLLKPMLGRGELRCIGATTLDEYRKYIEKDAALERRFQQVYCGEPEVEDTVSILRGLRERYELHHGVKISDGALVAAAVLSDRYI…	0.990625	1.01437	0.956875	0.96875	1.02375	0.955	1.08, 0.96, 1.16, 1.07, 0.99, 0.96, 1.02, 1.02, 0.9, 0.93, 0.96, 0.89, 0.87, 1.14, 0.94, 0.96	1.03, 1.01, 1.24, 1.03, 1.1, 1.07, 1.16, 0.85, 0.97, 0.94, 0.83, 1.02, 0.77, 1.16, 0.98, 1.07	1.01, 0.89, 1.04, 0.98, 0.87, 0.99, 1.16, 1.0, 0.89, 0.82, 0.91, 0.8, 0.93, 1.1, 1.04, 0.88	0.94, 0.93, 0.9, 0.92, 0.88, 1.03, 1.14, 0.99, 1.0, 0.87, 0.94, 0.9, 1.07, 0.97, 1.11, 0.91	0.96, 1.06, 1.07, 0.96, 1.11, 1.11, 1.14, 0.83, 1.08, 1.01, 0.86, 1.14, 0.88, 1.01, 1.05, 1.11	0.98, 0.88, 0.84, 0.96, 0.79, 0.93, 1.01, 1.19, 0.92, 0.87, 1.09, 0.79, 1.2, 0.95, 1.06, 0.82	0.0213984	0.0314108	0.0250453	0.0204914	0.0250146	0.0321973
p16243	TPM=29.88 Putative ortholog: Os03g29180 ubiquinone biosynthesis protein COQ9, mitochondrial precursor, putative, expressed comp5068_c0_seq1_g1014	AG[IL]GVGP[IL]QD[IL][IL]GK, DVGVSPA[IL]VGAFQR, MGWSESAM[IL]AGAR, [IL]KDA[IL]N[IL]EK	4	MASSLAARRLLSRAFAARRVLPCASPLPSSPSALRRLATDASPPPPLPPPPLEPTVDSPKSEGASSYPGAAAGAGGSYRSGPGAASGGRRPGGAGYEVEQEKVLRASLLHVPRMGWSESAMIAGARDVGVSPAIVGAFQRKEAALVEFFMDDCLQQLMDRVDAGEGEQLKTLILTERLARLIRMRLEMQAPYISKWPQALSIQSQPANVSTSLKQRAVLVDEIWHAAGDSGSDIDWYVKRAVLGGIYSTSEVYMLTDNSPEFRDTWTFVNSRIKDALNLEKSVKEAGYLAEAMRAGLGVGPIQDILGKVFQK	0.975	1.0725	1.015	1.0375	1.095	0.955	0.95, 0.98, 0.93, 1.04	1.13, 0.96, 0.95, 1.25	1.05, 1.09, 0.9, 1.02	1.1, 1.11, 0.97, 0.97	1.19, 0.97, 1.02, 1.2	0.92, 1.14, 0.95, 0.81	0.0239792	0.0721543	0.0409268	0.0390246	0.0586657	0.0686173
p8532	TPM=84.42 Putative ortholog: Os03g56280 lactate/malate dehydrogenase, putative, expressed comp1995_c0_seq1_g283	AGAGSAT[IL]SMAYAAAK, SGVEE[IL][IL]P[IL]GP[IL]NEFER, [IL][IL]GVTT[IL]DVVR	3	MEQGGADAAARRMGRIASHLLPPTSQMQEVSILRGSNCRAKGAAPGFKVAVLGASGGIGQPLSLLMKMNPLVSVLHLYDVVNTPGVTADISHMNTGAVVRGFVGQPQLENALTGMDLVIIPAGIPRKPGMTRDDLFNINAGIVRTLCEGIAKCCPNAIVNIISNPVNSTVPIAAEVFKKAGTYNPKRLLGVTTLDVVRANTFVGEVLGLDPRDVNVPVVGGHAGVTILPLLSQVNPPCSFTPEEISYLTSRIQNGGTEVVEAKAGAGSATLSMAYAAAKFADACLRGLHGDAGIVECSYVDSQVTELPFFASKVRLGRSGVEEILPLGPLNEFERAGLEKAKKELSESIQKGVSFVNK	0.963333	0.986667	0.963333	1.00333	1.02667	0.99	0.89, 1.08, 0.92	0.98, 1.12, 0.86	0.9, 0.98, 1.01	1.01, 0.91, 1.09	1.11, 1.04, 0.93	0.92, 0.87, 1.18	0.0589727	0.0751295	0.0328295	0.0520683	0.0523874	0.0960902
p12470	TPM=60.12 Putative ortholog: Os01g11880 DJ-1 family protein, putative, expressed comp3427_c0_seq1_g174	AGANV[IL]VASVEDK, FN[IL]VADMM[IL]DEAAK, MEEVAGP[IL]YVGPQDR, SEYATEE[IL]NPVK, VV[IL]DGN[IL][IL]TSR	5	VATVASAPAGDEGLLVEAAYGVKLVADGRVADLQDEAFDLIALPGGMPGSANLRDCKVLEKMVKKHAEEGGLYGAICAAPAVALAHWGMLKGLKATCYPSFMEKFPSDVIPANSRVVVDRNAVTSQGPGTSVEFALALVEQLYGKQKMEEVAGPLYVGPQDRSEYATEELNPVKWKCSGTPQVLVPVANGSEEMEALNLIDILRRAGANVIVASVEDKLQIVTRRHKFNLVADMMLDEAAKMEFDLIVMPGGLLGAEKFASTEKLVDLLKKQAESNKPYGAICASPAHVLEPHGLLKGKKATAFPPMAHLLTDQSHCENRVVIDGNLITSRAPGTATEFAVAIVDKLFGREKALSIAKELIFM	0.996	0.932	0.964	0.97	0.956	1.046	0.91, 0.96, 1.27, 0.9, 0.94	0.96, 1.04, 0.81, 0.92, 0.93	0.95, 0.93, 1.19, 0.81, 0.94	1.04, 0.97, 0.94, 0.9, 1.0	1.06, 1.09, 0.63, 1.01, 0.99	0.98, 0.89, 1.48, 0.88, 1.0	0.0693253	0.0370675	0.0619355	0.0240832	0.0834026	0.111068
p76239	TPM=21.13 comp7034_c0_seq2_g1302	AGD[IL]DGA[IL]VVHK, TA[IL]DSMMEQGH[IL]PR, [IL][IL]SPT[IL]TAP[IL]VHGV[IL]TAASSANR	3	HLRHALCSSTTATIDAAAPAIDPPTPAASAGDTPAAAAAAAEVDSAADSPPPRAPREEEPLQETIFTMIRRRKWTTRMENSIRLLSPTLTAPLVHGVITAASSANRADLALQFFRFAYRRAGFRPEPATFALLVPILASNRMLNHARCILLETMPAFSVAPGEATVAALVAAYGKAGIPQEAVKLFRLMPELGITRTALSYNAVLKAILCRGREAMARRIYNAMIADGVAPTLATYNTLIWGFGLCKKMESAVRVFGDMKTHGVAPDVTTYNTLLNAWVRAGDLESARKVFDEMPGAGFEQNTISYNVMIKGYVDGNKVDEAVGLFTEMGEKGLRLSEKTFAALMPGLCDNEGKAAEARKAVEDMAERRLTPKDKSVFLRLVTTLCKAGDLDGALVVHK…	0.98	0.896667	0.916667	0.936667	0.913333	1.03	0.96, 1.09, 0.89	0.95, 0.97, 0.77	0.86, 1.0, 0.89	0.89, 0.92, 1.0	0.98, 0.89, 0.87	0.91, 1.03, 1.15	0.0585947	0.0635959	0.0425572	0.0328295	0.0338296	0.069282
p61037	TPM=44.52 comp3017_c0_seq1_g176	AGDESYESFMVER, A[IL]GAAQAAGAAPDAYYA[IL]R, SMGYTDDD[IL]P[IL]VSFQSVSK	3	QVLAEENQKKIVEFCKNEGLVLLADEVYQENIYVEDKKFHSFKKIARSMGYTDDDLPLVSFQSVSKGYHGECGKRGGYMEVTGFNADVREQIYKVASVNLCSNVSGQILSSLIMNPPKAGDESYESFMVERDGILSSLARRAKALEEAFNSLEGITCNKAEGAMYLFPRLHLPQKAIGAAQAAGAAPDAYYALRLLQATGIVVVPGSGFGQAPGTYHFRCTILPQEDKIPAIISRFKEFHEKFMDEYRDGSSTSSKTESVEDKTGSGGDKTAGSGDTTVSGGDKTESGGDK	1	1.03	1.03333	1.04333	1.03667	1.00667	0.9, 1.11, 0.99	0.99, 1.1, 1.0	1.07, 1.06, 0.97	1.19, 0.96, 0.98	1.1, 1.0, 1.01	1.08, 0.97, 0.97	0.0608276	0.0351188	0.031798	0.0735603	0.031798	0.0366667
p13373	TPM=60.84 Putative ortholog: Os05g51530 vacuolar ATP synthase subunit C, putative, expressed comp2697_c0_seq1_g957	AGGVESGT[IL]TVDGVPVDSY[IL]TR, DW[IL]ASYES[IL]DTFVVPR, ETVAS[IL]QSQVAK, F[IL]SVV[IL]APSTK, SN[IL]F[IL]EGVSHK, YW[IL]AA[IL]PVQSADGAS[IL]AAAK	6	MATRYWIAALPVQSADGASIAAAKTALWGRLQDSISRHSFDTPLYRFTVPDLRPGTLDSLLALSDDLVKSNIFIEGVSHKIRRQIEDLERAGGVESGTLTVDGVPVDSYLTRFVWDEGKYPVNAPLKETVASIQSQVAKIEDDMKVRVAEYSNVKSQLGAINRKQTGSLAVRDLSNLIKPEDMVTTEHLVTLLSIVPKYSQKDWLASYESLDTFVVPRSSKKLYEDNEYALYTVTLFAKVVDNFKVHAREKGFQIRDFEYSPEAQESRKQELEKLLQDQELMRTSLLQWCYASYSEVFSSWMHFCAVRVFVESILRYGLPARFLSVVLAPSTKSEKKVRSILEGLCGNANSSYWRSEDDVGIAAGLGGETESHPYVSFTINFV	0.981667	1.025	0.926667	0.946667	1.04667	0.905	0.85, 0.96, 0.95, 1.08, 0.97, 1.08	0.9, 1.05, 1.06, 1.04, 1.13, 0.97	0.88, 0.87, 0.99, 1.03, 0.97, 0.82	1.04, 0.9, 1.03, 0.95, 1.0, 0.76	1.06, 1.09, 1.11, 0.96, 1.16, 0.9	0.98, 0.83, 0.93, 0.99, 0.86, 0.84	0.0357227	0.032532	0.0333333	0.0430245	0.0399722	0.0290689
p7526	TPM=276.1 Putative ortholog: Os11g04670 2-isopropylmalate synthase B, putative, expressed comp248_c0_seq1_g1195	AGNAS[IL]EEVVMA[IL]K, ANEFG[IL]V[IL]GK, EYGMTSVTEG[IL]DA[IL]ATTR, GTYE[IL][IL]SPDD[IL]G[IL]TR, KTPEQVVA[IL]AK, VTDED[IL]EA[IL][IL]SDE[IL]FQPK, [IL]GVD[IL][IL]EAGFPASSPDD[IL]DAVR	7	ACLAAAPRRPEYVPDRIDDPNYVRIFDTTLRDGEQSPGATMTSAEKLVVARQLARLGVDIIEAGFPASSPDDLDAVRSIAIEVGNTPVGDDAHVPVICGLSRCNKRDIDAAWEAVRHARKPRIHTFIATSEIHMQHKLRKTPEQVVAIAKEMVAYARSLGCPDVEFSPEDAGRSNREFLYHILEEVIKAGATTLNIPDTVGYTLPHEFGKLIADIKANTPGIENAIISTHCQNDLGLASANTLAGADAGARQLEVTINGIGERAGNASLEEVVMAIKCRRELLDGLYTGINSQHITMTSKMVQEHSGLHVQPHKAIVGANAFAHESGIHQDGMLKFKGTYEIISPDDIGLTRANEFGIVLGKLSGRHAVRTKLVELGYEINDKEFEDFFKRYKEVAEKK…	1.05143	1.10714	1.05286	1.00857	1.06571	0.951429	0.94, 0.96, 1.19, 1.14, 0.93, 1.11, 1.09	0.93, 1.15, 1.07, 1.05, 1.19, 1.08, 1.28	0.95, 1.04, 1.0, 1.09, 1.0, 0.99, 1.3	1.01, 1.09, 0.84, 0.96, 1.08, 0.89, 1.19	0.99, 1.2, 0.9, 0.93, 1.29, 0.98, 1.17	1.02, 0.91, 0.93, 1.04, 0.83, 0.91, 1.02	0.0400849	0.0423542	0.0443854	0.0461586	0.0573567	0.0292305
p12076	TPM=55.55 Putative ortholog: Os04g57950 dihydroorotate dihydrogenase protein, putative, expressed comp2538_c0_seq1_g669	AGPG[IL][IL]GVN[IL]GK, NFTNP[IL]G[IL]AAGFDK, [IL]AVTAAAHGFVPK	3	GPSRQASTASAASSGAAAAAPNKVPPPPRKGRLLTGAMIGLTIAGGAYVSTTDEATLCGWIFRSTELVNPLFALLDAEFAHRLAVTAAAHGFVPKEKRPDPPVLGLEVWGRNFTNPIGLAAGFDKNAEAVEGLLGLGFGFVEVGSVTPQPQEGNPKPRIFRLKEHGAVINRCGFNSEGIVVVAKRLGAQHGKRKMEETSSYASSNSNVKQGGKAGPGILGVNLGKNKTSEDAAADYVQGVHSLSQYADYLVINISSPNTPGLRALQGRKQLRELVKKVHDARDEMQWAEDGPPPLLVKIAPDLSKEDLEDIAAVALSSKLDGLIISNTTIARPPPAETHPLAQEAGGLSGKPLFDSSTRVLKEMYILTGGTIPLIGCGGVTSGEDAYKKIRSGATLVQL…	0.973333	1.05	1.04333	1.06667	1.07667	0.99	0.89, 1.06, 0.97	1.05, 1.13, 0.97	1.07, 1.1, 0.96	1.19, 1.03, 0.98	1.17, 1.06, 1.0	1.02, 0.97, 0.98	0.0491031	0.046188	0.0425572	0.0633333	0.0497773	0.0152753
p8272	TPM=54.29 Putative ortholog: Os04g34100 expressed protein comp1122_c0_seq2_g1093	AGQEA[IL]ENVFR, [IL]T[IL][IL]GTSG[IL]SGSYVE[IL]R	2	MAASARSAATAARSALRRAPLAGPSLPHLAPSSRAGILRRSAAAWLETRMPLHSAAASAARLGSCATQDGNNAFSWNSKRMFSSNEKHLPAISDPEIEAAFKDLMAASWNELPDSLVEEAQKAVSKATDDKAGQEALENVFRAAEACEEFSGVLVTLRMALDDLCGITGENVGPLPGYVEEAVKSAYNRYMTYLASFGPEEHHLRKKVETELGTKMIHLKMRCSGIGAEWGKITLIGTSGISGSYVELRA	1.08	0.985	0.945	0.875	0.92	0.96	1.0, 1.16	1.01, 0.96	0.93, 0.96	0.92, 0.83	1.01, 0.83	0.92, 1.0	0.08	0.025	0.015	0.045	0.09	0.04
p15900	TPM=27.37 Putative ortholog: Os02g06410 CBS domain containing membrane protein, putative, expressed comp5903_c0_seq1_g99	AGS[IL]TAVPVVDAPVDAY[IL][IL]QDGR, [IL]WVVDDGEEA[IL][IL]R	2	MAQMRAFGDELQQEEALHGHGLDKDGAVGGESNKKARAGLCGVLRERKVLELARAKQRLVEVPYTATLANAANALLAGGVSAVTVAAPPGHWIGAGGSMIVESDPATGVARKHYIGMVNMLDILTHIAEAGHDDDAAAVGDGQAAPPEAIDLDSRMSVPVSSVIGHSLEGLTLWTFHPNTSLLDCMETFSKGVHRALVPLESSAENVVAVELVESAPVYRMLTQMDVVRFLRAHGAELGGVLSRTVRELGAASEAVLAVANRTKVIEAIRTMRAGSLTAVPVVDAPVDAYILQDGRGKKVVETFSATDLRDCPVAQLRSWLGTTVAEFKKKVAEYRRDGSKPLDAATGVQATDDGDTAGTTVDAGGVAGTGNEEKPPRPREMVTCSMDSTLGEVIEKAA…	1.065	0.99	1.1	1.035	0.93	1.12	1.08, 1.05	0.94, 1.04	1.13, 1.07	1.05, 1.02	0.87, 0.99	1.21, 1.03	0.015	0.05	0.03	0.015	0.06	0.09
p3571	TPM=245.95 TMHMM=1 SignalP=yes Putative ortholog: Os03g53950 strictosidine synthase, putative, expressed comp366_c0_seq1_g1082	AGTVD[IL]FA[IL][IL]PGFPDNVR, F[IL][IL]S[IL]P[IL]PAK, GEVQGPESVAFDPR, NFMQ[IL]VFAGDPSGR, VGPDGG[IL]ATP[IL]AVEAEGVR, YSPEGEV[IL]D[IL][IL]EDTK	6	MVSTGVVVAAAVVAALAAFCGTDPLRLGSMVDFPGFEAHVVELPDAAEMPPHADAAERLRGAEIRFRGEVQGPESVAFDPRGRGPYTGVADGRVVLWDGARWAYFAHASPNWTADRCGGPKASPMEYLRDEHVCGRALGIRFDRRTGDLYIADAYYGLCKVGPDGGLATPLAVEAEGVRFNFTNDLDLDADGNVYFTDSSVLYQRRNFMQLVFAGDPSGRLLKYDPKTEETTVLHRNLQFPNGVSLSKDGSFFVFCEGSRGRLSRYWLKGEKAGTVDLFAILPGFPDNVRTNEKGEFWVAIHCRRSVYARLVSRHIRLRKFLLSLPIPAKFHYLMQIGGNLHALIIKYSPEGEVLDILEDTKGQVVRAVSEVEEKDGKLWIGSVLMPFIAVFDYANES	1.03333	1.04	0.991667	0.963333	1.01	0.958333	0.98, 0.93, 1.1, 1.12, 1.06, 1.01	1.04, 0.99, 0.94, 1.02, 1.09, 1.16	0.95, 0.93, 0.99, 1.04, 0.99, 1.05	0.97, 1.0, 0.9, 0.93, 0.94, 1.04	1.06, 1.06, 0.85, 0.91, 1.03, 1.15	0.91, 0.94, 1.06, 1.02, 0.92, 0.9	0.0298515	0.0315172	0.0193936	0.0207632	0.0449444	0.0268845
p19535	TPM=26.12 Putative ortholog: Os04g10400 electron transfer flavoprotein subunit beta, putative, expressed comp7380_c0_seq1_g1118	AGV[IL][IL]SSVDE[IL][IL]DK, A[IL]A[IL]QENPG[IL]V[IL][IL]GK	2	ADTLRTALAMGADRAFHVLHDPDPARPLLPLAVAKVLRALALQENPGLVILGKQAIDDDCNQTGQMLAALLNWPQGTFASKVVIDKDKQKATVEREVDGGTETICLDLPAVITTDLRLNQPRYATLPNIMKAKSKVIKKVTPAELNVDIRSDMEVVQVDEPPKRKAGVILSSVDELLDKLKNEARVL	0.885	0.97	0.925	1.05	1.09	0.965	0.88, 0.89	1.05, 0.89	0.96, 0.89	1.1, 1.0	1.19, 0.99	0.92, 1.01	0.005	0.08	0.035	0.05	0.1	0.045
p2647	TPM=32.7 TMHMM=1 SignalP=yes Putative ortholog: Os03g64110 WD domain, G-beta repeat domain containing protein, expressed comp2488_c0_seq1_g643	AHEGD[IL]AG[IL]AWAPR, [IL]W[IL]APEVSST	2	KEGSTAADPVPHTLYLPLRPAAAREQMAAPAAEVASALSVPLLSAILGGAIALVFLAGYLRRKRADIAHIPPSATAAAPDLPKQVRPSNQPRKGSRPHHHAAAADKEAAKKHHHLDLNTLRGHTDCVTALSFSGDAGSLATVCADGAVRVFRIDDASSKSFKILKIDLPAGAHPTAIAFSEGTTSVVVAAQALLGSSLYMYADVSAPPAGGNKQQGKLSPPEIKWDHKKIHGKESVLNLSAARATHGTGDGSTIVISCSEATDIKIWHGKSGKELGTVDTNQLKNNMADISPNGRFIAAAAFTADVKVWEIVYSKDSSVKEVNRVMQLKGHKSAVTSLCFTPDSEKIITASKDGTIRVWNINVRYHLDEDPKTLRVLAIPLHDSEGSPCLYNHMGISPD…	0.84	0.805	0.815	0.98	0.95	1.07	0.89, 0.79	0.96, 0.65	0.73, 0.9	0.82, 1.14	1.07, 0.83	0.76, 1.38	0.05	0.155	0.085	0.16	0.12	0.31
p56757	TPM=108.9 comp1494_c0_seq1_g1063	AKGEAEA[IL][IL]AR, MVSESMSAEGSTEAAN[IL]R, [IL]VMS[IL]NEAASDWG[IL]K	3	KTFEERDTLNVKIVMSINEAASDWGLKCLRYEIRDISPPIGVKKAMEMQAEAERRKRAQILESEGAMLDQANRAKGEAEAILARSQATAEGIRMVSESMSAEGSTEAANLRVAEQYIKAFAALAKNTTTMILPSDAGNPSAMIAQSLNIYKHIFKSSGPKEGSPQEEAAEEADQTSVTSGMPPLGAQSDHGSGFTLQRGRSPQN	1.11	1.11667	1.04667	0.943333	1.01333	0.95	1.11, 1.2, 1.02	1.28, 1.0, 1.07	1.0, 1.14, 1.0	0.9, 0.95, 0.98	1.15, 0.84, 1.05	0.78, 1.14, 0.93	0.0519615	0.0841295	0.0466667	0.0233333	0.0913479	0.104403
p10104	TPM=374.82 Putative ortholog: Os02g12800 elongation factor 1-gamma, putative, expressed comp292_c0_seq1_g623	AKNP[IL]D[IL][IL]PPSK, TFTSEFPHVER, VNAM[IL]ED[IL]EPFEGEA[IL][IL]DAK, VPV[IL]ETPDGAVFESNA[IL]AR	4	MALVLHSGSGNKNAYKALIAAEYCGINVELAKNFEMGVSNKTPEFIKMNPLGKVPVLETPDGAVFESNAIARYVARSKGDNVLYGSSLIDYAHVEQWMDFAATEVDTNLARWLYPRLGYMPYIAPSEEVAIAGLKRALDALNTHLASNTFLVGHAVTLADIVMTCNLYHGFARILTKTFTSEFPHVERYFWTMVNQPNVKKVIGEVKQADAVPAIQKKAAAPAKPKEVKKEAPKEAPKPVVEALEEEAPKPKAKNPLDLLPPSKMVLDDWKRLYSNTKSNFHEVAIKGFWNMFDPEGYSLWFCEYKYQEENTVSYVTMNKVGGFLQRMDLCRKYAFGKMLVVGSEPPFKLKGLWLFRGQEIPKFVMEEVYDMELYTWTKVDLSDEAQKERVNAMIEDLE…	1.0425	1.07	1.025	0.98	1.02	0.9725	1.13, 0.92, 1.06, 1.06	1.31, 0.86, 1.16, 0.95	1.24, 0.87, 0.91, 1.08	1.1, 0.95, 0.86, 1.01	1.17, 0.93, 1.09, 0.89	0.95, 1.02, 0.79, 1.13	0.0440407	0.101735	0.0849019	0.0504975	0.0660808	0.0712244
p8732	TPM=48.35 Putative ortholog: Os09g23160 annexin, putative, expressed comp976_c0_seq1_g741	AM[IL][IL]W[IL][IL]DPAGR, TF[IL][IL]S[IL]VGSH	2	RDRDPAPRMARPGPSFPTSKEDLKRRRAHRTPPVMASLTLPPAPPNPRQDAIDLHKAFKGFGCDSTAVSNILAHRDSMQRGYIQHEFKTMYSEELSRRISSELSGNHKKAMLLWILDPAGRDATVLRDALSVEAPDLRAATDIICSRTPSQLQIMKQTYYAKFGTYLEHDIGQQTSGDHQKILLAYLGIPRYEGPEVDPTIVTHDAKDLYKAGEKKLGTDEKTFIRIFTERSWAHLAAVASAYHHMYDRSLEKVVKNETSGNFEVALITILRCAENPAKYFAKALRKSMKGLGTDDRTLIRIVVTRTEIDMQYIKAEYYKKYKKPLSDAIHSETSGSYRTFLLSLVGSH	0.88	0.865	0.9	1.035	0.995	1.06	0.83, 0.93	0.95, 0.78	0.92, 0.88	1.12, 0.95	1.15, 0.84	0.98, 1.14	0.05	0.085	0.02	0.085	0.155	0.08
p10287	TPM=125.16 Putative ortholog: Os04g42600 polyadenylate-binding protein, putative, expressed comp853_c0_seq1_g1355	AMEA[IL]NFAH[IL]NNQP[IL]R, DAG[IL]SPAAPMGT[IL]TSN[IL]ANATPDQQR, E[IL]FSSFGK, GFGFVQYEK, P[IL]YVAFAQR, T[IL][IL]GES[IL]YP[IL]VEA[IL]ER, [IL]NDKEWYVGR	7	AGVGVGGPQPVATTSLYVGDLEASVTDAQLYELFSQAGQVLSVRVCRDVNSRRSLGYAYVNFNNPMDAARAMEALNFAHLNNQPIRVMYSNRDPSSRRSGSANIFIKNLDKTIDNKTLHDTFSAFGPILSCKVAMDDIGQSKGFGFVQYEKEESAQSAMKGLNGMLINDKPVYVGPFLRKQERDNSFDKAKFNNVFVKNLSESTTKEDLLKVFSEYGNITSAVVMVGMDGKSRCFGFINFESPDAAARAVEELNGKKINDKEWYVGRAQKKSEREMDLKRSFQQSMKDAADKYQGQNLYLKNLNDGISDDQLRELFSSFGKITSCKVMRDQNGVSKGSGFVSFSTREEASQALTEMNGKMISGKPLYVAFAQRKEDRKAMLQAQFSQMRPVPMTPTMTP…	0.934286	1.00429	0.975714	1.04714	1.07857	0.975714	0.97, 1.05, 0.91, 0.88, 0.92, 0.87, 0.94	0.95, 1.11, 1.07, 0.98, 0.92, 0.95, 1.05	0.96, 0.99, 1.0, 0.93, 0.95, 0.96, 1.04	0.99, 0.95, 1.09, 1.06, 1.03, 1.1, 1.11	0.99, 1.06, 1.17, 1.11, 1.0, 1.1, 1.12	1.01, 0.9, 0.93, 0.95, 1.04, 1.0, 1.0	0.0231822	0.0272429	0.0139484	0.0227527	0.0248259	0.0188802
p4864	TPM=359.77 TMHMM=1 Putative ortholog: Os01g73990 cytochrome b5-like Heme/Steroid binding domain containing protein, expressed comp601_c0_seq2_g70	AMMDEYYVGE[IL]DATT[IL]PTK, VFT[IL]EEVAK	2	MTGGPVQYLPPPPTNSPSLPHLCSDPNPITLFFPLHHDAPNSEREKKMSSSPKVFTLEEVAKHSSKDDCWLVIGGKVYNVTKFLDDHPGGDDVLLSSTAKDATDDFEDVGHSTTARAMMDEYYVGEIDATTIPTKVKYTPPKQPHYNQDKTPEFVIKILQFLVPLAILGLAVAVRIYTKSESA	0.875	0.875	1.05	1.2	1	1.2	0.89, 0.86	0.75, 1.0	0.93, 1.17	1.04, 1.36	0.84, 1.16	1.23, 1.17	0.015	0.125	0.12	0.16	0.16	0.03
p21491	TPM=23.99 Putative ortholog: Os03g16440 outer membrane protein, OMP85 family, putative, expressed comp8766_c0_seq1_g5	AMPSGG[IL]SMDGPPTT[IL]SGTGVDR, [IL]EYVHPY[IL]DGVDDR, [IL]SPVFVAGPNMEEAPPVWVDR	3	FPFSLPPATARAPQPAESPTTPPAARDLPPLPVPSSRRGRSGPVPQRHSVEHVARGGRSSSRMYGRRASQLLKELETLVSCGMFERVDLEGKAKPDGTLGLTVSFTESVWSAAKQFKCINVGLMAQSGQADFDQDMTEREKMDYLRKQERDYQQRVRGAMPCILPETVRGEVLAMMKKQEKVSARMLQKIRDHVQKWYHNEGFVCAQVVNFGNLNTSEVVCEVVEGDITKVEYQFQDKLGNFVEGNTQIPIIDRELPQQLRPGHIFNIGAGKQALKNINSLALFSNIEVNPRPDETKEGGIVVEIKLKELEPKSAEVSTEWSIVPGRQGRPTLASIQPGGTVSFEHRNIYGLNRSIVGSVTSSNLLNPQDDLSFKLEYVHPYLDGVDDRNKNRTFKTSC…	0.86	0.916667	0.893333	1.04333	1.07	0.973333	0.8, 0.97, 0.81	0.9, 1.01, 0.84	0.8, 1.02, 0.86	1.0, 1.06, 1.07	1.13, 1.04, 1.04	0.88, 1.01, 1.03	0.0550757	0.0497773	0.0656591	0.0218581	0.03	0.0470225
p7624	TPM=67.05 Putative ortholog: Os03g11410 mitochondrial-processing peptidase subunit, mitochondrial precursor, putative, expressed comp1424_c0_seq1_g1403	AMS[IL][IL]AD[IL][IL]QNSK, ES[IL]EAY[IL]K, ETG[IL]FGVYAVAK, E[IL]ED[IL]GGH[IL]NAYTSR, R[IL]P[IL]PE[IL]FAR, TATVGVW[IL]DAGSR, [IL]PTDPTTTGM[IL]VAK	7	MPYDRISEAVNARVRRLEHPDPRFLRYASPVPAHADHSAILAAPATRVTTLENGLRVATESNLAARTATVGVWIDAGSRYEADEAAGVAHFVEHMLFKGTGTRSAGQLEKEIEDIGGHLNAYTSREQTTYYAKVLDKDVPRAMSILADILQNSKLDDECIKRERSVILREMQEVEGQSEEVIFDHLHATAFQYTSLGRTILGSADDVKSITKESLEAYIKKHYTASRVVITAAGNVKHEDIVQQAKELFNKLPTDPTTTGMLVAKEPATFTGSEVRIIDDDMPLAQFAVAFNGASWTDPDSIALMVMQTMLGSWNKSAGGGKHMGSELVQRVAINEIAESIMAFNTNYKETGLFGVYAVAKADCLDDLAFAIMQEMSKLSYRVTEDDVIRARNQLKSSI…	0.938571	1.04286	0.952857	1.01714	1.10857	0.931429	0.87, 0.92, 0.93, 0.95, 1.06, 0.95, 0.89	0.99, 0.94, 1.22, 0.86, 1.2, 0.88, 1.21	0.87, 0.92, 0.97, 0.98, 0.99, 0.89, 1.05	1.0, 1.0, 1.04, 1.03, 0.93, 0.94, 1.18	1.14, 1.01, 1.31, 0.9, 1.13, 0.92, 1.35	0.88, 0.99, 0.79, 1.15, 0.83, 1.01, 0.87	0.0231382	0.0612067	0.0237762	0.0313744	0.0670972	0.0473301
p14581	TPM=40.89 Putative ortholog: Os01g43030 tetratricopeptide repeat domain containing protein, expressed comp2812_c0_seq1_g1256	AN[IL][IL]EQ[IL]F[IL]K, [IL][IL]DTV[IL]AEHDVANR	2	MGSSLPPKEANLFKVIVKSYETKQYKKGLKAADSILKKFPDHGETLSMKGLTLNCMDRKSEAYELVRRGLKNDLKSHVCWHVYGLLYRSDREYREAIKCYRNALRIDPDNIEILRDLSLLQAQMRDLSGFVETRQQLLTLKPNHRMNWIGFAVAHHLSSNSSKAIEVLEAYEGTLEDDYPPENERYEHGEMLLYKISLLEECGMLDRALEEMHKMESKIVDKLSFREQMACILLKLRRFEEAEKIYRSLLFMNPDNYKYLIALQKCLGLHSENGQYSADDVEKLSALYKSLKEEYSWSSAVKRIPLDFLEGDKFQEAADNYVRPLLTKGVPSLFSDLSPLYEHPGKANILEQLFLKLEDSIRTSGCFPGSPQMEPPSTLMWTLLLVSQHYDRRSQYDIA…	1.06	1.12	0.985	0.925	1.055	0.875	1.08, 1.04	1.22, 1.02	1.04, 0.93	0.96, 0.89	1.13, 0.98	0.85, 0.9	0.02	0.1	0.055	0.035	0.075	0.025
p8137	TPM=799.61 Putative ortholog: Os08g23710 ribosomal protein L7Ae, putative, expressed comp162_c0_seq2_g730	ANFNDKFDEVR, NEDK[IL]EFSK, N[IL]ATN[IL]FK, PAQVTNP[IL]FEK, QFG[IL]GGA[IL]PPK, TASV[IL]C[IL]TTVK	6	MAPKRGGKAPVPAKKKPAQVTNPLFEKRPKQFGIGGALPPKKDLHRFVKWPKVVRIQRQRRILKQRLKVPPALHQFTRTLDKNLATNLFKMLLKYRPEDKAAKKERLLKRAQAEAEGKTVEAKKPIVVKYGLNHVTYLIEQSKAQLVVIAHDVDPIELVVWLPALCRKMEVPYCIVKGKSRLGSIVHKKTASVLCLTTVKNEDKLEFSKILEAIKANFNDKFDEVRKKWGGGVMGSKSQAKTKARERLIAKEAAQRLT	1.03	1.23667	1.10333	1.07333	1.19833	0.896667	1.15, 0.96, 0.93, 1.0, 0.95, 1.19	1.63, 1.24, 1.04, 1.33, 0.92, 1.26	1.5, 1.06, 1.08, 1.1, 0.84, 1.04	1.31, 1.11, 1.16, 1.1, 0.88, 0.88	1.42, 1.3, 1.11, 1.33, 0.97, 1.06	0.92, 0.86, 1.04, 0.83, 0.91, 0.82	0.0455339	0.100488	0.0881539	0.0683943	0.0720841	0.0331327
p58527	TPM=87.12 comp1737_c0_seq2_g840	ANHF[IL]VGFADK, MVDHNNYAADT[IL]AR, QE[IL][IL]QD[IL]FWTTTDPK, TSS[IL]GGQ[IL]VAYDGSK	4	SAPLARRPPPPAAAAVPAPPPPAPAAEVGASQPESQAPALPAAAPVSSKSVMPPARPGFGTSGRKMIVRANHFLVGFADKDICHYDVAISPEPKTRRINRVIMTELMNKHRTSSLGGQLVAYDGSKSLYTAGELPFTVMDFSVKLGKERREIEYKVTVRFAARANLYHLQQFLGGRQRDCPQDTIQALDVVLRESPCQNYVTVSRSFFSATFGHGDIGGGLECWRGFYQSLRPTQMGLSLNIDISSTSFYRPIPVMEFARDCLNLRTVDANRPPSDRDRLKLRRALRGVRVETTHQEGKKSMYKITGITSDPLVQLNFPLDEGTQMTVVQYFWDRYKYRLKFTSWPCLQSGSAARPIYLPMEVCTIIKGQRFSRKLNEKQVTAILKATCERPKQREESI…	0.9825	1.025	1.035	1.055	1.045	1.025	1.01, 1.05, 0.91, 0.96	1.18, 0.91, 1.12, 0.89	0.97, 1.08, 1.12, 0.97	0.96, 1.03, 1.23, 1.0	1.16, 0.87, 1.23, 0.92	0.83, 1.18, 1.0, 1.09	0.0303795	0.0733144	0.0384057	0.0600694	0.0883648	0.0746659
p17580	TPM=29.81 Putative ortholog: Os07g33240 endoribonuclease, putative, expressed comp4708_c0_seq1_g1294	ANN[IL]VF[IL]SGV[IL]G[IL]NPETGK, STYQVAA[IL]P[IL]NAR, TT[IL]M[IL]AD[IL]QDFK	3	SRFDDKSHSNPTAAPPPIHSPLQFSARGWWSRVLAMAWSAAAAVSRFAASPAAEIRLPLSAAAAASVSFAGRRRFGPIAASLATSATVTKEAVQTEKAPAALGPYSQAIKANNLVFLSGVLGLNPETGKFVSEGVEEQTEQVMKNIGEILKASGASYSSVVKTTIMLADLQDFKKVNEIYAKYFPSPAPARSTYQVAALPLNARIEIECIAAL	0.993333	1.02	1.00333	1.00667	1.02667	0.986667	0.96, 1.04, 0.98	1.08, 0.98, 1.0	0.98, 1.11, 0.92	1.02, 1.06, 0.94	1.12, 0.94, 1.02	0.91, 1.13, 0.92	0.024037	0.0305505	0.0560753	0.0352767	0.0520683	0.0717248
p8130	TPM=54.54 Putative ortholog: Os03g04410 aconitate hydratase protein, putative, expressed comp1014_c0_seq1_g713	ANNMFVDYSQVQADR, AT[IL]ANMSPEYGATMGFFPVDAK, D[IL]WPTTDE[IL]SEVVK, NSYDE[IL][IL]TS[IL]AK, QVE[IL]PFKPAR, SENAVQANME[IL]EFSR, YS[IL]Q[IL]PTDVK, YYS[IL]PA[IL]ADPR, [IL][IL]DWENNSTK	9	ASPFAGRLFGSHRAAARSSSSATAIFERRFASAATKNSYDEILTSLAKQGGGAVFGKYYSLPALADPRIDRLPYSIRILLESAIRNCDDFQVTGKDVEKILDWENNSTKQVEIPFKPARVLLQDFTGVPAVVDLACMRDAMSKLGSDPNKINPLVPVDLVIDHSVQVDVARSENAVQANMELEFSRNKERFGFLKWGSTAFNNMLVVPPGSGIVHQVNLEYLARVVFNNGGILYPDSVVGTDSHTTMIDGLGVAGWGVGGIEAEATMLGQPMSMVLPAVVGFKLSGKLRNGVTATDLVLTVTQMLRKHGVVGKFVEFYGGGMGELSLADRATIANMSPEYGATMGFFPVDAKTLEYLKLTGRSDETVAMIESYLRANNMFVDYSQVQADRVYSSYLELD…	0.956667	0.993333	1.01778	1.06778	1.04444	1.02778	0.95, 0.92, 0.98, 0.85, 0.96, 1.03, 0.89, 1.07, 0.96	0.96, 1.02, 1.1, 1.02, 0.92, 1.02, 0.99, 0.94, 0.97	0.98, 1.04, 0.99, 0.93, 1.05, 1.06, 1.14, 1.04, 0.93	1.02, 1.13, 1.02, 1.1, 1.09, 1.03, 1.28, 0.97, 0.97	1.01, 1.1, 1.12, 1.2, 0.96, 0.99, 1.12, 0.88, 1.02	1.01, 1.03, 0.91, 0.91, 1.14, 1.04, 1.15, 1.1, 0.96	0.0223607	0.0180278	0.0224708	0.0323942	0.0328342	0.0301744
p8866	TPM=207.01 Putative ortholog: Os06g43850 ATP synthase F1, delta subunit family protein, putative, expressed comp684_c0_seq1_g1016	ANS[IL]DKVESE[IL]R, AVTD[IL]FSEAGFSDVTK, ET[IL]QD[IL][IL]GK, FVD[IL]TMAHK, NF[IL][IL]V[IL]ASNGR, VPEA[IL]YGGTGNYASA[IL]F[IL]AAAK	6	SVRGPSGCIASTFSSSRSTGPWRSLLLLSSSSRSPPRFRSPPPRNQPEMAAARHLRSGLPLLQAHLAAAESAAVAQVSRGLATQASKPSQKQIKVPEALYGGTGNYASALFLAAAKANSLDKVESEIRDIVAATKKSPMFSQFLKDSSVPKETRVKAVTDIFSEAGFSDVTKNFLLVLASNGRLKFVERIADRFVDLTMAHKGEVKVVVRTVVPLPEKEEKELKETLQDILGKDKTILVEQKIDYSIMGGLVIEFGQKVFDMSIKTRAKQMESFLRQPVDF	0.948333	1.025	0.956667	1.01167	1.085	0.94	1.0, 0.87, 0.88, 0.93, 0.99, 1.02	1.08, 1.01, 1.08, 1.07, 0.86, 1.05	1.04, 1.01, 0.9, 0.84, 0.9, 1.05	1.04, 1.16, 1.02, 0.9, 0.92, 1.03	1.08, 1.17, 1.22, 1.14, 0.87, 1.03	0.97, 0.99, 0.83, 0.79, 1.06, 1.0	0.0262573	0.0347131	0.0358391	0.0383333	0.0509084	0.0432049
p7460	TPM=90.68 Putative ortholog: Os07g09060 aldehyde dehydrogenase, putative, expressed comp1546_c0_seq1_g1049	ANS[IL]VVNSGAANDAD[IL]GPV[IL]SR, ASFAGD[IL]NFYGK, ATEYVDVTNPATQDVVSR, DAT[IL]NA[IL][IL]AAGFGAAGQR, DPGAAMM[IL]AE[IL]AMEAG[IL]PK, EE[IL]FGPV[IL][IL][IL]MK, YGNGAS[IL]FTTSGVSAR, [IL][IL][IL]GGEFVESR	8	PPAPIQNPTTAVAASSGRSTPMLRAVLSRSASGLRRSPMAAPLSTAAASWLSEAASSPPRVRLLIGGEFVESRATEYVDVTNPATQDVVSRIPLTTADEFKAAVDAARTAFPGWRNTPVTTRQRIMFKYQELIRANMDKLAENITTEQGKTLKDAWGDVFRGLEVVEHACGMGSLQMGEYVSNVSHGIDTFSIREPLGVCAGICPFNFPAMIPLWMFPIAVTCGNTFVLKPSEKDPGAAMMLAELAMEAGLPKGVLNIVHGTHDVVNNICDDEAIKAVSFVGSNTAGMHIYSRASAKGKRVQCNMGAKNHAIILPDADRDATLNALIAAGFGAAGQRCMALSTAVFVGGSEPWEDELVKRANSLVVNSGAANDADLGPVISRQAKERICKLVQSGIDTG…	1.01	0.99375	1.0925	1.07875	0.985	1.10875	1.04, 0.93, 1.02, 1.07, 0.97, 1.04, 1.01, 1.0	1.05, 0.99, 0.94, 0.9, 0.97, 1.3, 0.85, 0.95	1.11, 0.96, 1.13, 1.17, 0.99, 1.17, 1.07, 1.14	1.06, 1.03, 1.1, 1.09, 1.02, 1.13, 1.06, 1.14	1.01, 1.06, 0.92, 0.85, 1.0, 1.25, 0.84, 0.95	1.05, 0.97, 1.19, 1.29, 1.02, 0.9, 1.26, 1.19	0.0155839	0.0485113	0.0282052	0.0155193	0.0465603	0.0505483
p7322	TPM=153.11 Putative ortholog: Os09g19734 isochorismate synthase 1, chloroplast precursor, putative, expressed comp774_c0_seq1_g775	ANSASNV[IL]TT[IL]TADEYAAPG[IL]K, D[IL][IL]AS[IL]N[IL]NNK, GDS[IL]TASYYH[IL]VEK, GD[IL][IL][IL]GE[IL]QSQ[IL]K, VST[IL][IL]QHEFR, VST[IL][IL]QHEFRPK	6	MGGPGLYTGIGKKAKDLLYKDYQTDQKFTLTTYAANGAAITATSTKKGDLILGEIQSQIKNKGITVDVKANSASNVITTITADEYAAPGLKTIFSFAVPDQKSGKVELQYLHDYAGINASIGLTANPVVNLSAAFGNSALAVGADVALDTATKNLTKYNAGLSYTNKDLIASLNLNNKGDSLTASYYHIVEKSNAAVGAELTHSFSSNENSLTIGTQHILDPLTLVKARFNNSGKVSTLIQHEFRPKSLITISAEVDTKAIEKSSKVGIALALKP	0.963333	1.02833	0.966667	1.00333	1.07167	0.951667	0.96, 0.92, 0.82, 1.03, 1.05, 1.0	0.94, 1.25, 0.87, 1.12, 0.98, 1.01	0.97, 0.85, 0.83, 1.06, 1.04, 1.05	1.01, 0.93, 1.01, 1.03, 0.99, 1.05	0.98, 1.36, 1.06, 1.09, 0.93, 1.01	1.03, 0.68, 0.96, 0.94, 1.06, 1.04	0.0345125	0.0557026	0.0421637	0.0168655	0.0621512	0.0576435
p81085	TPM=31.91 comp8424_c0_seq1_g292	ANSDSQV[IL][IL]TGTTEYPR, H[IL]TA[IL]SYPFK, P[IL][IL]NFSGVVGNK	3	LSEIQTQFKYNNVKFDVKANSDSQVLITGTTEYPRVPGLKHITAISYPFKTPGKNELQYQNDYAGLSLGVGMNSKPLINFSGVVGNKTVAVGGDVAYDTAIGDWTKYNAGVSLTKEDLVASVMLNNKGDSLTASSYYMVNKQSAVGG	1.08667	1.07333	1.11667	1.03	0.986667	1.05	1.17, 1.05, 1.04	1.09, 0.99, 1.14	1.11, 1.18, 1.06	0.94, 1.12, 1.03	0.93, 0.94, 1.09	1.02, 1.19, 0.94	0.0417665	0.0440959	0.034801	0.0519615	0.0517472	0.0737111
p8972	TPM=94.59 Putative ortholog: Os06g04270 transketolase, chloroplast precursor, putative, expressed comp773_c0_seq1_g1182	ANSYSVHGAA[IL]GTSEVEATR, EYG[IL]TAENVVAAAK, VTTT[IL]GFGSPNK	3	RVRASAAVETVEGAAATGELLDKSVNAIRFLAIDAVEKANSGHPGLPMGCAPMGHILYDEVMRYNPKNPYWFNRDRFVLSAGHGCMLQYALLHLAGYDAVKEADLKQFRQWGSSTPGHPENFETPGVEVTTGPLGQGIANAVGLALAEKHLAARFNKPDSEIVDHYTYCIVGDGCNMEGILNEACSLAGHWGLGKLITFYDDNHISIDGDTEIAFTEDVSARFEALGWHTIWVKNGNDGYDEIRKAIQEAKAVTDKPTLIKVTTTIGFGSPNKANSYSVHGAALGTSEVEATRANLGWPYEPFFVPEDVKSHWSRHVPQGAALEADWDAKFAQYEQKYPEDAATLKSIITGELPAGWADALPQYTPESAADATRNLSQQCLNALAPVVPGLIGGSADLA…	0.95	0.9	0.9	0.946667	0.933333	1.04667	0.84, 1.09, 0.92	0.64, 1.15, 0.91	0.89, 1.02, 0.79	1.06, 0.93, 0.85	0.76, 1.06, 0.98	1.38, 0.89, 0.87	0.0737111	0.147309	0.0665833	0.0611919	0.0896908	0.166767
p59462	TPM=120.66 comp1657_c0_seq1_g888	ANTFVAEV[IL]GVDPR, GGAEE[IL][IL]P[IL]GP[IL]NDFER, [IL][IL]GVTT[IL]DVAR	3	ISNPVNSTVPIAAEVFKRAGTYCPKRLLGVTTLDVARANTFVAEVLGVDPREVSVPVVGGHAGITILPLLSQVSPPCSFTPDEISYLTNRIQNGGTEVVEAKAGAGSATLSMAFAAAKFADACLRGMRGDAGIVECSYVASEVTELPFFATKVRLGRGGAEEILPLGPLNDFERAGLEKAKKELSESIQKGVAFMNK	1.01333	0.963333	0.943333	0.943333	0.96	0.98	1.14, 0.94, 0.96	1.02, 0.87, 1.0	0.96, 0.95, 0.92	0.85, 1.02, 0.96	0.9, 0.93, 1.05	0.94, 1.09, 0.91	0.0635959	0.0470225	0.0120185	0.0497773	0.0458258	0.0556776
p6505	TPM=81.38 Putative ortholog: Os02g04080 chromosome segregation protein sudA, putative, expressed comp1016_c0_seq1_g470	ANVDA[IL]NNFTK, S[IL]EYT[IL][IL]DHE[IL]NDAR	2	MYIKKVVIEGFKSYREETSTEPFSPKVNVVVGANGSGKSNFFHAIRFVLSDMFQNLRSEDRGALLHEGAGHSVVSAFVEIVFDNSDNRIPVDKEEVRLRRTVASKKDEYYLDGKHVSKTEVMNLLESAGFSRSNPYYVVQQGKIASLTLMKDSERLDLLKEIGGTRVYEDRRRESLKIMQETANKRKQIDQVVRYLEDRLRELDEEKEELKKYQQLDKQRRSLEYTILDHELNDARNELASMDDNRRKISERMSNADNEVVDLREKVKSFDKEIKVSTKGINETRSEKDDAEKKRTEALKVVSQIELDLRDIKDRISSEKRAKDEAIRDLHSMKKESEKSKSELAQISRVHAAKLKEEEEISKSIMDREKRLSILYQKQGRATQFKNEAARDEWLRKEI…	1.01	0.95	1.055	1.045	0.94	1.11	1.08, 0.94	1.03, 0.87	1.18, 0.93	1.09, 1.0	0.95, 0.93	1.15, 1.07	0.07	0.08	0.125	0.045	0.01	0.04
p6883	TPM=97.43 Putative ortholog: Os03g29190 PDI, putative, expressed comp1448_c0_seq1_g1290	AP[IL]AVHGAEAFPFTEER, G[IL]PH[IL]V[IL][IL]DAK	2	MAAAPTTGGGVGPILAAGERDYLVRNSGEQVKISSIEGGVVALYFSASWCPPCRRFTPKLIEAYKELASHGKSFEVVFVSGDQDEEAFNAYFAKMPWLAVPFSDSEGRTALDGRFEVRGIPHLVILDAKTGQVLTGDGVEFVSEYGVEAYPFTPERISELKEQEKAAKDNQTIHSVLGTPERDYVISNKGDKVPISDLEGKYVGLCFVVSGYGPVEDFTTMFAKIYGKLKEVGEKFEVVAISLDSDEASFTESFSSMPWLAIPQGDKKCQKLVSYFELSDLPTVVLIGPDGKTLNNNIADIIDEHGMDAWEGFPFNAEKLAILAEKAKAKAASQTLESLLVTGDLDFVIGKDGAQVPVSELAGKTVLLYFSAKWCGPCRAFLPTLVDVYNKIKEKNSDF…	1.035	0.99	1.04	1.015	0.965	1.055	1.11, 0.96	0.96, 1.02	1.03, 1.05	0.93, 1.1	0.87, 1.06	1.07, 1.04	0.075	0.03	0.01	0.085	0.095	0.015
p9670	TPM=182.47 Putative ortholog: Os07g47780 60S ribosomal protein L18-3, putative, expressed comp457_c0_seq1_g1085	AP[IL]GQNTV[IL][IL]R, SHFNAV[IL][IL]K, VYEVPA[IL]K	3	AGLWGPATSRHQAALNYGMAAGDVGMVVVAPAASFHHTHHHHHHHDAASNPDPIFPLLSAGPCVLDPDAAKAAAASSGIQFWQSSSSQHHQQQQQPQSPPSGGNNPNPSLGAFYLKKPLPMLDTGGAGSSGSGTATCQDCGNQAKKDCSHSRCRTCCKSRGFDCSTHVKSTWVPAARRRERQHLGGSESTQAATSTAAAAAEAASPPRAAMGIDLVAGGRNKRTKRTAPKSDDVYLKLLVKLYRFLVRRTKSHFNAVILKRLFMSKTNLPPLSMRRLVRFMDGKGDQIAVIVGTITDDKRVYEVPAIKVAALRFTETARARIVNAGGECLTFDQLALRAPLGQNTVLLRGPKNAREAVRHFGKAPGVPHSHTKPYVRSKGRKFEKARGRRNSRGFKCSA…	0.973333	0.94	0.963333	1.03	1.00333	1.02333	1.16, 0.82, 0.94	0.78, 0.96, 1.08	0.8, 1.09, 1.0	0.69, 1.33, 1.07	0.68, 1.18, 1.15	1.01, 1.13, 0.93	0.0995546	0.087178	0.0856997	0.185831	0.161898	0.0581187
p119831	TPM=3.19 comp25322_c0_seq1_g692	APAPGYGAPAPAYGR, HAPAPAYGAPATAYGR	2	MPLTPSVVDIYTARLGLGQIHTTDRPIMEFPHRHGHGHGRRDDDDSDDRRAPAPGYGAPAPAYGRDDDYGRHAPAPAYGAPATAYGRDDDYGRH	1.12	0.98	1.195	1.065	0.87	1.225	1.21, 1.03	1.1, 0.86	1.26, 1.13	1.04, 1.09	0.91, 0.83	1.14, 1.31	0.09	0.12	0.065	0.025	0.04	0.085
p55586	TPM=209.71 comp1426_c0_seq4_g462	APDPAPAPAVAPPVR, EPA[IL]AAPAASAAAPSR	2	ERIVQRRESEFSSLRKERDERVNQLISSRKRERETVRKLMYYLNLEEQRIQRQREEDEARKREDEERRKKEELERKAKLDAIAAKQAQREREMEEKAQREREALLRGAEPVRAPDPAPAPAVAPPVREPALAAPAASAAAPSRYVPKFKRSGDSSSSSQRPAAAPEQDRWGSRDDRPRPDSRPLRQDAPPARPEAAPARSFARQEAPPARQQDGAPAAPSTDRWRPGGSRPSANASSTPSSAPWRRS	1.03	0.985	1.005	1.015	0.98	1.025	0.72, 1.34	0.77, 1.2	0.8, 1.21	1.12, 0.91	1.07, 0.89	1.04, 1.01	0.31	0.215	0.205	0.105	0.09	0.015
p8902	TPM=919.45 Putative ortholog: Os10g27190 40S ribosomal protein S17, putative, expressed comp101_c0_seq1_g1077	APEVTSSAPAFR, MDFVPEK, MT[IL]DFHTNK, VAGFTTH[IL]MR, V[IL]EEVS[IL][IL]QSK	5	AAAAGEEERAAAAAMGRVRTKTVKKTSRQVIEKYYSRMTLDFHTNKKVLEEVSILQSKRLRNKVAGFTTHLMRRIQRGPVRGISLKLQEEERERRMDFVPEKSALEVDEIRVDKETMEMLAFLGMGDLPGVDRAPEVTSSAPAFRQPFNGPRGGNRA	0.996	1.04	0.962	0.968	1.048	0.926	1.07, 0.92, 1.0, 1.01, 0.98	0.97, 1.02, 1.05, 1.03, 1.13	0.95, 0.94, 0.99, 0.95, 0.98	0.88, 1.03, 0.99, 0.94, 1.0	0.91, 1.1, 1.06, 1.02, 1.15	0.97, 0.93, 0.94, 0.92, 0.87	0.0242074	0.0260768	0.00969536	0.0263439	0.0406694	0.0163095
p9441	TPM=117.38 Putative ortholog: Os12g13380 adenylate kinase, putative, expressed comp1177_c0_seq1_g696	APGVDDVTGEP[IL][IL]QR, GE[IL]VSDD[IL]VVG[IL][IL]DEAMK, GF[IL][IL]DGFPR, V[IL]NFA[IL]DDA[IL][IL]EER, [IL][IL][IL]VGPPGSGK	5	MAANLEDVPSVELMTELLRRAKCSSKPDKRIILVGPPGSGKGTQSPLIKDEYCLCHLATGDMLRAAVAAKTHLGIKAKEAMNKGELVSDDLVVGIIDEAMKKPSCQKGFILDGFPRTVVQAQKLDEMLAKQGAKVDKVLNFAIDDAILEERITGRWIHPSSGRSYHTKFAPPKAPGVDDVTGEPLIQRKDDTAAVLKSRLEAFHIQTEPVIDYYSKHGLVANLHAEKPPKEVTVEVQKALS	1.064	1.058	0.988	0.932	0.994	0.942	0.99, 1.21, 1.07, 1.07, 0.98	1.05, 1.29, 0.92, 1.03, 1.0	1.11, 1.03, 0.9, 1.0, 0.9	1.12, 0.85, 0.84, 0.93, 0.92	1.07, 1.06, 0.85, 0.96, 1.03	1.05, 0.8, 0.99, 0.97, 0.9	0.0411825	0.0620806	0.0401746	0.0503389	0.0408167	0.0428252
p57701	TPM=70.33 comp1881_c0_seq2_g1127	APPSAPVTTGFTEQD[IL]VR, GAG[IL][IL]GTPSV[IL]AAR, VPTAPAPP[IL][IL]PTPVPAASGGAR, YQPSGDS[IL]Y[IL]SV[IL]R	4	MASSSAGYVSIPRCPVIFDGTNYGEFAAFMRIHMRGLRLWGVLTGEVPCPPRPIAPVPPTPPPVPQALAADATQADRDTAKSAEATADEAYEERVLAYSEALGSYRDSLASFTQWCDEDARAAAVLSQSVQPQFASEFMGLATVAEMWSHLRQRYQPSGDSLYLSVLRQEHDLQQGDSTVDEFYTQSAAIWRQLDSLRSAVCGTCQCCRTVRSDMDFQRIHEFLSRLRPEFEPRRAQLFARGRVPISEVLTEIRAEETRLRGAGLLGTPSVLAARVPTAPAPPLLPTPVPAASGGARSSRGAGRSRPPRFCNHCRRSGHLESDCYQKQRGVPPRAPPSAPVTTGFTEQDIVRLQRLLASSGSASTGTAASAAVSSPQSGTSSWVLDSGASFHMSPDSSS…	1.1125	1.0175	1.0925	0.985	0.9125	1.0825	1.07, 1.02, 1.34, 1.02	1.02, 0.94, 1.26, 0.85	1.03, 1.09, 1.27, 0.98	0.96, 1.07, 0.95, 0.96	0.96, 0.92, 0.94, 0.83	1.01, 1.16, 1.01, 1.15	0.0767436	0.0879749	0.0632949	0.0284312	0.0286865	0.0419076
p5339	TPM=28.26 TMHMM=1 SignalP=yes Putative ortholog: Os03g50450 inactive receptor kinase At2g26730 precursor, putative, expressed comp7169_c0_seq1_g501	APSQAA[IL]NDEGVD[IL]PR, PAAAAVQPFD[IL]ED[IL][IL]R, VSDNG[IL]AT[IL]VGSSSAP[IL]R, [IL]AD[IL]GE[IL]QHEF[IL]VP[IL]R	4	PPSPTTTTTNPNNKNNLSGGAIAGIAIGSVIGAALLLLLLICLCRRSTRTKTRSLEMPPPSPAAIPAGGRKPPETTSSAAIAPLAGMGHPNAPMGQSTSGKKLVFFRPAAAAVQPFDLEDLLRASAEVLGKGAIGTTYKAVLESGATVAVKRLKDVNMTEPEFRERIADIGELQHEFIVPLRAYYFSKDEKLLVSDFMPMGSLSALLHGNRGSGRTPLNWPTRASIALAAARGIEYIHSTSSTTSHGNIKSSNILLGKSYQARVSDNGLATLVGSSSAPLRATGYRAPEVTDPRRVSQKADVYSFGVLLLELLTGKAPSQAALNDEGVDLPRWVQSVVRSEWTAEVFDMELLRHQDSEEQMVQLLQLAIDCVAQVPDARPTMSHVVVRIDEIKRSSESV…	1.0625	0.94	0.9475	0.895	0.885	1.03	1.08, 1.12, 1.07, 0.98	0.91, 1.13, 0.77, 0.95	0.99, 0.91, 0.93, 0.96	0.92, 0.81, 0.87, 0.98	0.84, 1.01, 0.72, 0.97	1.1, 0.81, 1.2, 1.01	0.0295452	0.074162	0.0175	0.0361709	0.0658913	0.0829659
p9776	TPM=673.22 Putative ortholog: Os03g59310 ribosomal protein, putative, expressed comp203_c0_seq1_g1388	APYQEFTD[IL][IL]AK, A[IL][IL][IL]DAPVEK, EHQ[IL]VET[IL]CPG[IL]K, MEE[IL]Y[IL]HS[IL]PVK	4	RGDRGGRRGGRRGPRQEEEKWVPVTKLGRLVKEGRFSKMEEIYLHSLPVKEHQIVETLCPGLKDEVMKITPVQKQTRAGQRTRFKAFVVVGDSNGHVGLGVKCAKEVATAIRGAIILAKLSIVPVRRGYWGNKIGQPHTVPCKVTGKCGSVTVRMVPAPRGSGIVAARVPKKVLQFAGIEDVFTSSRGSTKTLGNFVKATFDCLMKTYGFLTPDFWRETTFTKAPYQEFTDLLAKPTKALLLDAPVEKIDA	1.035	1.155	1.0375	1.005	1.12	0.9	0.97, 0.95, 1.17, 1.05	1.16, 1.18, 1.24, 1.04	1.07, 1.01, 1.09, 0.98	1.1, 1.06, 0.93, 0.93	1.19, 1.24, 1.06, 0.99	0.92, 0.86, 0.88, 0.94	0.0499166	0.0419325	0.0256174	0.0440643	0.0575905	0.0182574
p13486	TPM=61.51 Putative ortholog: Os03g58700 vacuolar protein sorting-associated protein 35, putative, expressed comp2115_c0_seq1_g1235	AQ[IL]TA[IL]H[IL][IL][IL]GT[IL]QR, Q[IL]VA[IL][IL]SAP[IL]EK, [IL]EA[IL]FD[IL][IL]K, [IL]QGQDGDVTGEEVPATPK	4	QPHPAKPEGAEPRATRSPTPTPSRAAADEDEGRRPDPPPEPAKTASARMLPDGGGGDDEERWLAEGIAGVQQNAFYMHRALDSNNLKDALKYSAQMLSELRTSRLSPHKYYELYMRAFDEMRKLEMFFREETRRGSCSVVDLYELVQHAGNVLPRLYLLCTVGSVYIKSKEAPAKDVLKDLVEMCRGIQHPLRGLFLRSYLSQISRDKLPDIGSEYEGDADSINDAVEFVLQNFIEMNKLWVRMQHQGPVREKDKRGKERNELRDLVGKNLHVLSQIEGVDLEMYKETVLPRISEQVVNCKDDLAQFYLMDCIIQVFPDEYHLQTLETLLSAFPQLQPNVDIKTVLSQLMDRLSNYAATSPEVLPEFLQVEAFAKFSNAIGKVIEAQVDMPVVGAVTLY…	0.99	1.1	0.945	0.955	1.115	0.8575	1.09, 0.98, 0.92, 0.97	1.02, 1.11, 1.06, 1.21	0.9, 0.97, 0.93, 0.98	0.82, 0.99, 1.0, 1.01	0.94, 1.13, 1.15, 1.24	0.88, 0.87, 0.87, 0.81	0.0358236	0.0410284	0.0184842	0.0451848	0.0630476	0.0160078
p9785	TPM=181.67 Putative ortholog: Os03g22730 nucleolar protein NOP5-1, putative, expressed comp640_c1_seq1_g1404	AQ[IL]YDY[IL]K, FENTSDA[IL]SAAT[IL][IL][IL]DSK, MNT[IL]APN[IL]TA[IL]VGE[IL]VGAR, YDA[IL]ADGDDNSMG[IL]ESR, [IL]VADN[IL]HYAK, [IL][IL]AHGGS[IL]MN[IL]AK	6	MLVLFETPAGFALFKVLDEGKLSKVEDLWKDFASSDKARKVVELKAFNKFENTSDALSAATLLIDSKPSKGLRKFLTKHCDGETLAVADSKLGNAIKEKLKIDCLHNSAVMELMRGLRSQLTELMSGLAEHDLGPMSLGLSHSLSRYKLKFSPEKVDTMIIQAIGLLDDLDKELNTYAMRVREWYGWHFPELTKIVADNIHYAKAVKLMGNRVNAVNLDFSEILEEDVEAELKEAAVISMGTEVNDLDLSNIRELCDQVLSLSEYRAQLYDYLKSRMNTIAPNLTALVGELVGARLIAHGGSLMNLAKQPGSTIQILGAEKALFRALKTKHATPKYGLIYHASLIGQAAPKHKGKISRSLAAKTALAIRYDALADGDDNSMGLESRIKLETRLRVLEGK…	0.988333	0.98	1.01167	1.03167	0.996667	1.045	0.95, 1.06, 1.02, 1.03, 0.94, 0.93	1.04, 1.03, 0.85, 0.89, 1.05, 1.02	1.21, 0.94, 1.08, 1.01, 0.92, 0.91	1.28, 0.89, 1.07, 0.99, 0.98, 0.98	1.1, 0.97, 0.83, 0.87, 1.12, 1.09	1.17, 0.92, 1.28, 1.13, 0.88, 0.89	0.0224227	0.0354024	0.0475687	0.0548584	0.0513593	0.0695102
p13945	TPM=37.41 Putative ortholog: Os05g02650 expressed protein comp3409_c0_seq1_g923	AQA[IL]VEA[IL]EGK, AVGAV[IL]T[IL][IL]K, [IL][IL][IL]T[IL]DKDNK	3	FPNSTRLCGASRIAQPPTPARSISAHRPLLLPVSGDIAPQAKAQGGAMDAELLELQRQLEAAQSARSSVRLSERNVVELVQKLQERGLIDFELLHTVSGKEYITSDHLKHEIKLEINNRGRASLVDLSDILGVDLYHVERQAQKVVTEDPALMLINGEIMSQSYWDTVTEEINEKLQERSQIALAEIAAQLHIGSDLVINILEPRLGTIVKGRLEGGQLYTPAYVSRITAMVRGAARGITVPTNLPSVWNSLQQQLQEMHGSNGVSVEGSFFQSIFAALLKEGAVLGSLRAGVNWTPAVFAHAQKESVDAFFSQNSYIGYEVLQKLAIPQPKQYLEARYPDGIALEAIFVHPSVVDMLDAAVGDAIENGQWIDSLSVLPSYISGPDATKILSLCPSFQK…	0.976667	1.11333	1.01667	1.04	1.13667	0.913333	0.95, 0.96, 1.02	1.01, 1.13, 1.2	0.97, 1.05, 1.03	1.02, 1.09, 1.01	1.06, 1.17, 1.18	0.96, 0.93, 0.85	0.0218581	0.0554777	0.024037	0.0251661	0.0384419	0.0328295
p7365	TPM=237.96 Putative ortholog: Os02g57260 3-ketoacyl-CoA thiolase, peroxisomal precursor, putative, expressed comp506_c0_seq1_g861	AQDC[IL][IL]PMG[IL]TSENVAER, G[IL]P[IL][IL]GVFR, SFVAVGVDPAVMGVGPAVA[IL]PAAVK, TG[IL]NPAE[IL]GDVVVGTV[IL]GPGSQR	4	NSSQTRPDPSHQTYPPTPSTTTPQPISDISAMEKAIDRQRVLLAHLLPSSSAATGQPQLSASECAAGDSAAYQRSSCFGDDVVIVAAYRTPICKAKRGGFKDTFPEDLLTPVLKAVLDKTGINPAEIGDVVVGTVLGPGSQRAIECRTASLLAGIPETVPVRTVNRQCSSGLQAVADVAAAIKAGFYDIGIGAGLESMSTNSVGWEGEVNPRVIELQKAQDCLLPMGITSENVAERYGVTRQEQDQAAVESHARAAAATASGKFKEEIVPVHTKIIDPKTGEAKKVVISVDDGIRPGTTVSGLAKLKTVFKKDGTTTAGNSSQVSDGAGAVLLMRRSVAVSKGLPILGVFRSFVAVGVDPAVMGVGPAVAIPAAVKAAGLEIDDIDLFELNEAFASQFV…	1.025	0.96	1.02	0.9925	0.9375	1.0625	1.06, 1.01, 1.02, 1.01	0.95, 0.99, 0.92, 0.98	1.07, 0.93, 1.04, 1.04	1.01, 0.92, 1.02, 1.02	0.9, 0.98, 0.9, 0.97	1.12, 0.94, 1.13, 1.06	0.0119024	0.0158114	0.0308221	0.0242813	0.0217466	0.0436606
p1851	TPM=48.65 TMHMM=11 SignalP=yes Putative ortholog: Os03g02380 major facilitator superfamily domain-containing protein 5, putative, expressed comp1866_c0_seq1_g1173	AQEMTGEDEP[IL]NP, D[IL][IL]AQFK	2	MEVFYYLVFGALSAVVAGLELGKSGKDRVATPTAFNAFKNNYVLVYSLMMSGDWLQGPYVYYLYSQYGFDKGDIGRLFIAGFGSSMLFGTIVGSLADKQGRKRACITYCITYILSCITKHSPQYRVLMIGRILGGVATSLLFSAFESWLVAEHNKRGYDPQWLSITFSKAIFLGNGLIAIIAGLFANLLADNLGFGPVAPFDAAACFLAIGMAIIMSSWSENYGDSSEGKDLIAQFKGAAKAIASDEKIALLGAIQSLFEGSMYTFVFLWTPALSPNDEDIPHGFIFATFMLSSMLGSSIASRLLARKMKVEGYMQIVFSVSAVTLFLPVATSLLVPASLKGNGISFAGSLQLLGFCTFESCVGIFWPSIMKMRSQYIPEEARSTIMNFFRIPLNLFVC…	0.795	0.875	1.1	1.405	1.105	1.31	0.76, 0.83	0.77, 0.98	1.29, 0.91	1.71, 1.1	1.02, 1.19	1.69, 0.93	0.035	0.105	0.19	0.305	0.085	0.38
p10314	TPM=111.94 Putative ortholog: Os12g32986 heat shock protein, putative, expressed comp605_c0_seq1_g1412	AQS[IL]GDTSS[IL]DFMR, A[IL]YY[IL]AGDS[IL]SSAK, EVSTEEYNEFYK, QEYSQTCDW[IL]K, QE[IL]VDS[IL]GT[IL]ASSGTAK, QYVWESEAESNSYT[IL]R, S[IL][IL]YVPATK, VFE[IL]NPDHE[IL][IL]K	8	VSADAAAAAPSANPPRSVTNREPAVSPHAGKRFFSVLAAPKLNVANNVLSLKLGEGSLVGRRFESSAAAVDSSDAPPAEKFEYQAEVNRLMDLIVHSLYSNKEVFLRELVSNASDALDKLRYLSVTEADLLKDGSELYIRIQTDKDNGIITITDSGIGMTRQELVDSLGTIASSGTAKFLKTLKESQEASVDSNLIGQFGVGFYSAFLVSDKVSVSTKSPKSDKQYVWESEAESNSYTIREETDPEKLIPRGTRLTLYLKRDDKGFAHPERIQKLVKNYSQFVSFPIYTWQEKGFTKEVEVDEDPAEAKTEGDDAKTEGDGEIKKETKKKTKTVVEKYWDWELTNETQPIWLRNPREVSTEEYNEFYKKTFNEYMDPLASSHFTTEGEVEFRSILYVPA…	0.975	1.03	0.975	1.00375	1.06	0.95375	0.88, 1.01, 0.93, 1.08, 0.95, 1.05, 0.94, 0.96	0.86, 1.07, 1.04, 1.11, 1.05, 0.96, 1.02, 1.13	0.97, 0.98, 0.94, 0.98, 0.97, 1.0, 0.99, 0.97	1.1, 0.97, 1.01, 0.91, 1.02, 0.95, 1.05, 1.02	0.98, 1.06, 1.12, 1.03, 1.11, 0.92, 1.08, 1.18	1.13, 0.91, 0.91, 0.88, 0.92, 1.03, 0.98, 0.87	0.0235281	0.0305894	0.00626783	0.0210389	0.0292159	0.0313356
p2702	TPM=35.5 TMHMM=2 SignalP=yes Putative ortholog: Os06g45380 vacuolar-sorting receptor precursor, putative, expressed comp2530_c0_seq1_g563	ARPGA[IL]PTF[IL][IL]VDR, GDVT[IL][IL]PT[IL]V[IL]NNR	2	MELRSTPPATRRLLLLASAVLLCTFFCSCEGRFVVEKNSLKVTAPDTLKGTYECAIGNFGVPQYGGTMVGVVAYPKANRKACKGFDDFDISYKARPGALPTFLLVDRGDCLFAKKAWNAQRAGAAAILVADDRVEPLITMDTPEESGKADYLENITIPSALITKSFGDRLKKAIDNGEMVNVNLDWTESLPHPDDRVEYEFWTNSNDECGRKCDSQIDFVKSFKGAAQILEKKGYTQFTPHYITWYCPESFTSSKQCKSQCINHGRYCAPDPEQDFSKGYDGKDVVVQNLRQVCVYQVAKDSQKPWLWWDYVTDFAIRCPMKENKYTKECADEVIKSLGLDHKAIDKCIGDPDADKENPVLKAEQDAQIGKGARGDVTILPTLVINNRQYRGKLDKGAV…	1.035	0.955	1.04	1	0.93	1.095	0.99, 1.08	1.01, 0.9	0.96, 1.12	0.97, 1.03	1.02, 0.84	0.95, 1.24	0.045	0.055	0.08	0.03	0.09	0.145
p8798	TPM=74.64 Putative ortholog: Os05g03820 glutamate--cysteine ligase, chloroplast precursor, putative, expressed comp1728_c0_seq1_g861	AS[IL]A[IL]QP[IL]ATA[IL]FANSPFK, D[IL]AED[IL][IL]Q[IL]AK	2	ARRGRRRGGAVAASPPTEEVAQMTEPLTKDDLVAYLASGCKPKENWRIGTEHEKFGFDVETLRPITYDQISGILNGLSERFEWDKIMEEGHVIGLKQGKQNISLEPGGQFELSGAPLETLHQTCAEVNSHLYQVKAVGEEMGVGFLGLGFQPKWPLSEIPIMPKGRYEIMRNYMPKVGSLGLDMMFRTCTVQVNLDFSSEQDMISKFRASLALQPIATAIFANSPFKEGKPNGFLSLRSHIWTDTDNNRSGMLPFVFDNSFGFEQYVDYALDVPMYFVYRNKKYLDCTGMSFRDFMVGKLPQVPGELPTLNDWENHLTTIFPEVRLKRYIEMRGADGGPWRRLCALPAFWVGLLYDEESLQSILDMTADWTKEEREMLRRKVPVTGLKTPFRDGYVRDL…	0.895	1.09	0.95	1.065	1.225	0.87	0.81, 0.98	1.02, 1.16	0.87, 1.03	1.08, 1.05	1.27, 1.18	0.85, 0.89	0.085	0.07	0.08	0.015	0.045	0.02
p13984	TPM=58.94 Putative ortholog: Os05g26660 NADH-ubiquinone oxidoreductase, mitochondrial precursor, putative, expressed comp2141_c0_seq1_g1013	AS[IL]PN[IL]TEEER, N[IL]DTS[IL]YDVHVVSPR	2	PPLLASSRPRPPPRVRKRANPARLPPRYPPRTAPPRPHADRSPMASSGGLSLVRRAVEAVRRTPRWQKRLVFLTVGVGTVSYACQDNRVLQINEGSTGKKKVVILGTGWAGASFLRNIDTSLYDVHVVSPRNYFMFTPLLPSVTCGTVEPRSIVEPIRNIVRKRGGAFRFWEAECFKIDPTSKKIHCRAGDGTNVDGNGEFVVDYDYLVVTVGAKPNTFNTPGVVENCHFLKEVEDAQKIRKSVMKCFEKASLPNLTEEERKKNVHFVVIGGGPTGVEFAAELHDFVNEDLAKLYPDVKKYVNISVIEAGDHILTMFDKRITHFAEDKFKREGIDLKTNFKVVKVSDKTITMTNPATGEIAVPYGLAVWSTGIGTRPIIMDFMKQVGQATRRVLATDEW…	0.985	0.94	0.985	0.995	0.945	1.06	1.04, 0.93	1.05, 0.83	1.03, 0.94	0.99, 1.0	1.0, 0.89	0.99, 1.13	0.055	0.11	0.045	0.005	0.055	0.07
p1541	TPM=63.16 TMHMM=1 SignalP=yes Putative ortholog: Os02g01010 OsPDIL1-4 protein disulfide isomerase PDIL1-4, expressed comp1655_c0_seq1_g368	ASA[IL]AEFVSANK, DA[IL]VAW[IL]TK, EFAQDF[IL]EDK, N[IL]DQ[IL]V[IL]DESK, QV[IL][IL]FAVASEASK, [IL][IL]HG[IL]DS[IL]V[IL]AK	6	MATTPPPPLPLLLLLPLLLLAAVFAATAAVAGDEFPRDGKVIDLDDSNFEAALSSIDFLFVDFYAPWCGHCRALAPDYAAAATHLATLDNLDVALAKVDATDEAELAEQYGVQGFPTLLFFIDGVHKDYTGERTKDAIVAWITKKLGPGVQNITTADEAERIVTGDDTAVLAFLESLSGSHSDELAAASRLEDTVNFYQTASPDVAKLFHIDPQSKRPAVVLLKKEEEKVTIYDGEFRASAIAEFVSANKLPLITTLTQENAPAIFESQIKKQVLLFAVASEASKFLPIFKEAAKPFKGELLFVFVERDSEEVGEPVANYFGITGQETTVLAYTGNEDAKKFFLSGEISLDNIKEFAQDFLEDKLTPFYKSDPVPESNDEDVKVVVGKNLDQIVLDESK…	0.958333	1.01167	0.958333	1.00167	1.05667	0.948333	0.98, 0.93, 0.95, 0.99, 0.94, 0.96	1.0, 0.95, 1.1, 1.0, 0.95, 1.07	0.96, 0.96, 0.99, 0.94, 0.93, 0.97	0.98, 1.03, 1.05, 0.95, 0.99, 1.01	1.02, 1.03, 1.15, 1.01, 1.01, 1.12	0.96, 1.0, 0.91, 0.94, 0.98, 0.9	0.00945751	0.0252212	0.00872417	0.0147007	0.0252543	0.0160035
p104227	TPM=2.83 comp17040_c0_seq1_g817	ASAEA[IL][IL]PS[IL]S[IL]WPPSQR, VVQT[IL]AAPSV[IL]SQR	2	RCALWVGDPASKSPTQSAHLTLLPPHATDLSLSSPLSLALHTTMAEDAPNAGAEGTHPTPTEATADSATPPPSSDKASAEALLPSLSIWPPSQRTRDAVVRRVVQTLAAPSVLSQRYGALPEP	0.99	0.76	0.935	0.945	0.76	1.275	0.93, 1.05	0.6, 0.92	0.89, 0.98	0.96, 0.93	0.64, 0.88	1.49, 1.06	0.06	0.16	0.045	0.015	0.12	0.215
p9046	TPM=131.89 Putative ortholog: Os01g02880 fructose-bisphospate aldolase isozyme, putative, expressed comp1246_c0_seq1_g1293	ASAGSYADE[IL]VSTAK, [IL]AS[IL]G[IL]DNTEVNR	2	RSGPARRAAVVRASAGSYADELVSTAKTVASPGRGILAIDESNATCGKRLASIGLDNTEVNRQAYRQLLLTTAGLGEYISGAIMFEETLYQSTTDGKTFVDCLKDQNIMPGIKVDKGLVPLPGSNNESWCQGLDGLASRCAEYYKQGARFAKWRTVVSIPCGPTALAVKEAAWGLARYAAIAQDNGLVPIVEPEILLDGDHGIERTLEVAEKVWSEVFFYLAENNVLFEGILLKPSMVTPGAEHKEKATAEAIAHNTLTMLKRRVPPAVPGIMFLSGGQSELEATMNLNAMNQSANPWHVSFSYARALQNSVLKTWQGRPENIEAAQKALLVRAKANSLAQLGSYTGEGESDEAKKGMFQKGMLVPTAVSSISSAETLELSEVLFVRTNRYCNAYSEKV…	0.955	0.875	0.94	0.985	0.92	1.095	0.95, 0.96	0.99, 0.76	0.93, 0.95	0.98, 0.99	1.04, 0.8	0.94, 1.25	0.005	0.115	0.01	0.005	0.12	0.155
p7826	TPM=139.46 Putative ortholog: Os02g17390 3-hydroxyacyl-CoA dehydrogenase, putative, expressed comp497_c0_seq1_g141	ASD[IL]D[IL]ASV[IL]GMGFPK, QS[IL]FAD[IL]EK, TSPQA[IL][IL]D[IL][IL]TVGK, T[IL]AGN[IL]EG[IL]VK, VPGVTD[IL]Q[IL]KPR	5	MAGSIRVTMDVGADGVALITIFNPPVNALHPIIIQGLKEKYAEAMDRDDVKAIVLTGAAGKFCGGFDINVFTIVQETGDVSHLPDVSVELVSNTMEAGKKPSVAAIQGLALGGGLELTMGCHARIATPETQLGLPELTLGVMPGFGGTQRLPRLVGLPKAIEMMLQSKFITAKEGKERGLIDALCSPDELIKVARFWALEIANYRKPWTRSIDRTDKLGSLSEARTVLSMARQQAKKVAANLPQHQACLDVIEEGVLCGGQAGVLKEANVFKELVLAPTARSLVHVFFAQRSTTKVPGVTDIQLKPRQIRKVAVIGGGLMGSGIATALLVGNISVVLKEVNAQFLQRGQKTIAGNLEGLVKRGSLTKDKMNKAISLLKGALDYEDFKDVDMVIEAVIEK…	1.008	1.036	0.932	0.93	1.03	0.9	1.13, 0.94, 0.95, 0.98, 1.04	1.12, 1.01, 0.99, 1.03, 1.03	1.01, 0.91, 0.9, 0.9, 0.94	0.9, 0.97, 0.96, 0.92, 0.9	0.99, 1.07, 1.04, 1.06, 0.99	0.9, 0.91, 0.91, 0.87, 0.91	0.0351283	0.0222711	0.0208327	0.0148324	0.0170294	0.00774597
p59998	TPM=145.44 comp721_c0_seq1_g146	ASDGQDD[IL][IL]DDDFK, [IL]DD[IL][IL]SD[IL]K	2	AAVRSPQTLIPPPLVAAITIPVLPRRSAALPPSPPRPQPPPIGFRGISREMAFLQKLGSIAKRSAGSGSSLLQAVRCMSSSKVFIGGISYGTDEQSLGDAFSSYGQVIEAKVIMDRETGRSRGFGFVTYTSAEEAGAAITGMDGKDLQGRIVRVSYAHDRGSRAGGFGGGGGSFGAGGGGYGGSGGGGYGGGGYSGGGGYGGGGYASGGGGGYNGGNYGPPQGGQGGYGGGDAGYTGGGGGGGYNAAPGNYGDGLNQGGGAPAAAFRDGNYDANNDVSAGKLDDLLSDLKFDVSGKEDVAVDAKASDGQDDLLDDDFKAEDVAEDDYVNKRS	0.85	1.045	1.065	1.245	1.24	1.03	0.91, 0.79	1.01, 1.08	1.25, 0.88	1.38, 1.11	1.12, 1.36	1.24, 0.82	0.06	0.035	0.185	0.135	0.12	0.21
p22975	TPM=20.18 Putative ortholog: Os06g01470 AGAP000326-PA, putative, expressed comp8508_c0_seq1_g37	ASG[IL][IL][IL][IL][IL]K, VASVAEAH[IL]QK	2	MSGAPAASGGLRTALSYCVQQVRSYDYHNYLCLLHLPPAMRRAAFTFRAFNVETAKAMDVVSDPRKGLMRLLWWKDVIDKIYANKTVEHPVALALSSVLSQQKISKHWLKRSLEARINDGNRDEYAIPETVPELERYAEDTQSTILYMTLQAGGIQSTVADHAASHIGKASGLLLLLKALPHHVSKQGTIPYIPASVAEECGLLTQEGGRSEVRMGDTLPDAVFKVASVAEAHLQKARELTASVPAEAIPVLLPAVPAQVLLDSMRRREFNVFDSRLSSGVHGISPLWYQLKLNWHAWRNKY	1.025	1.04	1.1	1.075	1.015	1.055	0.96, 1.09	1.01, 1.07	1.14, 1.06	1.18, 0.97	1.05, 0.98	1.12, 0.99	0.065	0.03	0.04	0.105	0.035	0.065
p8818	TPM=796.44 Putative ortholog: Os12g38000 60S ribosomal protein L8, putative, expressed comp106_c0_seq1_g889	ASGDYA[IL]V[IL]SHNPDNGTSR, AT[IL]SVGNV[IL]PVR, GVVTDV[IL]HDPGR	3	VGLEDGAAPSSPFPRPRRHRSLAAAAVAEMGRVIRAQRKGAGSVFKSHTHHRKGPARFRSLDFGERNGYLKGVVTDVIHDPGRGAPLAKVTFRHPFRYKHQKELFVAAEGMYTGQFVYCGRRATLSVGNVLPVRSIPEGGVICNVEHHVGDRGVFARASGDYAIVISHNPDNGTSRIKLPSGAKKIVPSGCRAMIGQVAGGGRTEKPMLKAGNAYHKYRVKRNSWPKVRGVAMNPVEHPHGGGNHQHIGHASTVRRDAPPGQKVGLIAARRTGRLRGQAAASAAKADKAT	0.976667	0.933333	0.963333	0.99	0.956667	1.03	0.91, 0.97, 1.05	0.91, 0.86, 1.03	1.05, 0.89, 0.95	1.15, 0.92, 0.9	1.0, 0.89, 0.98	1.14, 1.03, 0.92	0.0405518	0.0504425	0.0466667	0.0802081	0.0338296	0.0635085
p3014	TPM=54.96 TMHMM=5 Putative ortholog: Os01g42480 Yip1 domain containing protein, expressed comp2889_c0_seq1_g550	ASGSVPAATGPDPQS[IL]K, FADSN[IL]QTFPPSDTR	2	MMSGGGYSALDDPKASGSVPAATGPDPQSIKFADSNLQTFPPSDTRGKISGAYRPPTDADDTFSSKAGGGGGGGGGGADDAAQGGWFRMFSVAAYKPYFDVDTSDVVERIWESVFPFRGTFTDKTSEKPDLYGPFWTCTTLIFVAASIATFVTYLSHKWHKKEWTYDINLVTWSAGLFYGYVTFVPLGLYVILKYFSAPAGLVQLWCLYGYSLFVFIPASLLSIVPIEIFRWVIAGVAGFMSATFVAVNLRAHILNSGERWFLIVAGIFLLQLGLAVLLKLYLFTITV	1.06	1.05	1.09	1.025	0.995	1.04	1.03, 1.09	1.13, 0.97	1.05, 1.13	1.02, 1.03	1.1, 0.89	0.93, 1.15	0.03	0.08	0.04	0.005	0.105	0.11
p7604	TPM=132.81 Putative ortholog: Os03g22880 nucleolar protein 5A, putative, expressed comp1506_c0_seq1_g1353	ASMGQD[IL]SPVD[IL][IL]NVQQFAQR, D[IL]PA[IL]AD[IL][IL]GDEDK, MND[IL]APN[IL]TS[IL][IL]GEMVGAR, [IL]VEAQDEEMQANGDDETPK	4	RAVRLHFDQFIDQLKPSDLEKAQLGLGHSYSRAKVKFNVNRVDNMVIQAIFLLDTLDKDVNSFSMRVREWYGWHFPELVKIVNDNYLYAKLAKFVVNKSDLSEKDIPALADLIGDEDKAKEIVEAAKASMGQDLSPVDLINVQQFAQRVMNLSEYRKNLYEYLVTKMNDIAPNLTSLIGEMVGARLISHAGSLSNLAKCPASTLQILGAEKALFRALKTRGNTPKYGLIFHSSFIGRASTKNKGRMARYLANKCSIASRIDCYSDVSSSIFGEKLREQVEERLDFYDKGVAPRKNLDVMKAAIEGLTNTEDDDGKENGEASVKKSKKKKSKAEANGDAMDVDNVVAEAETQTEKKKKKKHKLVEAQDEEMQANGDDETPKKKKKKNRDASESVDPKTGT…	1.02	0.84	1.015	1.015	0.8225	1.2325	1.05, 0.81, 1.13, 1.09	0.81, 0.67, 0.83, 1.05	1.01, 1.01, 0.96, 1.08	0.96, 1.26, 0.85, 0.99	0.77, 0.83, 0.73, 0.96	1.24, 1.51, 1.15, 1.03	0.0718795	0.0785281	0.0246644	0.0870345	0.0502286	0.102011
p8077	TPM=478.75 Putative ortholog: Os03g40270 alpha-1,4-glucan-protein synthase, putative, expressed comp298_c0_seq1_g617	ASNPFVN[IL]K, DE[IL]D[IL]V[IL]PT[IL]R, D[IL]NA[IL]EQH[IL]K, N[IL]DF[IL]EMWR, Q[IL][IL]GPAMYFG[IL]MGDGQP[IL]GR, TG[IL]PY[IL]WHSK, VPEGFDYE[IL]YNR	7	HKPTPPLSAPTPTLARSRSRDPEIQVAAAMAGTVTVPGSSVPSTPLLKDELDIVIPTIRNLDFLEMWRPFFQPYHLIIVQDGDPSKVIKVPEGFDYELYNRNDINRILGPKASCISFKDSACRCFGYMVSKKKYVFTIDDDCFVAKDPSGKDINALEQHIKNLLSPSTPFFFNTLYDPYREGADFVRGYPFSLREGAPTAVSHGLWLNIPDYDAPTQMVKPRERNSRYVDAVLTIPKGTLFPMCGMNLAFDRQLIGPAMYFGLMGDGQPIGRYDDMWAGWCVKVICDHLSLGVKTGLPYLWHSKASNPFVNLKKEYKGIFWQEDIIPFFQSATLSKECDTVQKCYISLSEQVREKLGKIDPYFVKLADAMVTWIEAWDELNPSAAAASDVAAENGKAAK	0.967143	0.998571	0.982857	1.02429	1.03429	0.992857	0.98, 1.13, 0.88, 0.84, 0.9, 1.07, 0.97	1.1, 1.12, 0.98, 0.85, 0.86, 1.14, 0.94	1.0, 1.01, 1.03, 0.88, 0.91, 0.96, 1.09	1.02, 0.89, 1.17, 1.05, 1.01, 0.9, 1.13	1.12, 0.99, 1.11, 1.01, 0.96, 1.07, 0.98	0.91, 0.9, 1.05, 1.04, 1.05, 0.84, 1.16	0.0395037	0.046313	0.0272304	0.0398722	0.0245781	0.0424104
p8248	TPM=611.99 Putative ortholog: Os04g01740 heat shock protein, putative, expressed comp84_c0_seq1_g1047	ASST[IL]T[IL][IL]DSG[IL]GMTK, EVSHEWS[IL]VNK	2	MASETETFAFQAEINQLLSLIINTFYSNKEIFLRELISNSSDALDKIRFESLTDKSKLDAQPELFIHIVPDKASSTLTIIDSGIGMTKSDLVNNLGTIARSGTKEFMEALAAGADVSMIGQFGVGFYSAYLVAERVVVTTKHNDDEQYIWESQAGGSFTVARDTTGEQLGRGTKMVLYLKDDQMEYLEERRIKDLIKKHSEFISYPISLWTEKTTEKEISDDEDEEEKKDTEEGKVEDVDEEKEEKEKKKKKIKEVSHEWSLVNKQKPIWMRKPEEINKEEYAAFYKSLTNDWEEHLAVKHFSVEGQLEFKAVLFVPKRAPFDLFDNKKKANNIKLYVRRVFIMDNCEELIPEYLSFVKGIVDSEDLPLNISRETLQQNKILKVIRKNLVKKCIELFFE…	0.94	1.015	1.07	1.14	1.075	1.06	0.9, 0.98	0.92, 1.11	0.99, 1.15	1.1, 1.18	1.02, 1.13	1.08, 1.04	0.04	0.095	0.08	0.04	0.055	0.02
p6560	TPM=87.3 Putative ortholog: Os05g05470 T-complex protein, putative, expressed comp1199_c0_seq1_g548	AT[IL]EF[IL]ETFK, G[IL]DPPS[IL]D[IL][IL]AR, M[IL]NQNAEV[IL]NK, T[IL]AENSG[IL]DTQDV[IL]VA[IL]ENEHDR	4	AKSSQNPSPVRSLPISPSLSLCRSLRSDPPRRGAPCRRPAAMSIRMLNQNAEVLNKSAALHMNINAAKGLQEVLCTNLGPKGTIKMLVGGAGDIKLTKDGNTLLKEMQIQNPTAIMIARTAVAQDDSSGDGTTSTVLFIGELMKQSERCIEEGTHPRFLVDGFEVAKRATLEFLETFKTPVVMGAQPDREILKMVARTTLRTKLYEGLADQLTDIVVNAVLCIRQSDEPIDLFMVEIMHMRHKFDVDTRLIEGLVLDHGSRHPDMKRRAENCYILTANVSLEYEKSEINAGFFYSNAEQREKMVSAERRQVDERVKKIIELKNKVCSGTDKNFVVINQKGIDPPSLDLLARAGIIALRRAKRRNMERLVLACGGEAINSVDDLTEDCLGWAGLVYEHVL…	0.93	0.97	1	1.085	1.045	1.035	1.0, 0.92, 0.97, 0.83	1.03, 0.98, 0.96, 0.91	0.95, 1.1, 0.95, 1.0	0.95, 1.19, 0.99, 1.21	1.03, 1.07, 0.99, 1.09	0.92, 1.12, 1.0, 1.1	0.0371932	0.0248328	0.0353553	0.0670199	0.0221736	0.0464579
p7739	TPM=99.6 Putative ortholog: Os01g16900 dehydrogenase, putative, expressed comp1047_c0_seq1_g1686	AT[IL]FPGDG[IL]GPE[IL]AESVK, ENTEGEYSG[IL]EHQVVR, TESF[IL]TWES[IL]ESVR, VAEYAFHYAK, VAGVP[IL]EWEEHYVGTEVDPR, [IL]HNA[IL][IL]QT[IL]AEGK	6	MALRRLLQGSVLPRMMGRSVGASFSTEAGETIRATLFPGDGIGPEIAESVKQVFKVAGVPIEWEEHYVGTEVDPRTESFLTWESLESVRRNKVGLKGPMATPIGKGHRSLNLTLRKELGLYANVRPCNSLPGYKTRYDDVNLVTIRENTEGEYSGLEHQVVRGVVESLKIITRQASLRVAEYAFHYAKTNGRERVSAIHKANIMRKTDGLFLKCCREVAEKYPEIIYEEVIIDNCCMTLVKNPGTFDVLVMPNLYGDIISDLCAGLIGGLGLTPSCNIGEGGICLAEAVHGSAPDISGKNLANPTALMLSAVMMLRHLQFNDQAERIHNAILQTIAEGKYRTADLGGKSSTSDYTKAVCDHI	0.95	0.925	0.948333	0.996667	0.976667	1.02333	0.97, 0.97, 0.94, 0.91, 0.92, 0.99	1.05, 0.97, 0.85, 0.92, 0.88, 0.88	1.03, 0.99, 0.89, 0.89, 0.89, 1.0	1.06, 1.02, 0.95, 0.98, 0.96, 1.01	1.08, 1.0, 0.91, 1.02, 0.96, 0.89	0.98, 1.02, 1.04, 0.97, 1.0, 1.13	0.0129099	0.0301938	0.0266354	0.0168655	0.0290593	0.023758
p13521	TPM=43.55 Putative ortholog: Os03g63860 DANA2, putative, expressed comp2352_c0_seq1_g1312	ATAAAT[IL]A[IL]SAAGD[IL]R, NAWEFAVAR, TA[IL]D[IL]S[IL]AFDPANK, VATTFD[IL]SDQSK, [IL]TTVEPTFDTAK	5	VPGIGITYPVPDWWGVTELTTKVVSCSWRPRERERLFRELISLSRAWLLGPRTPNQLYRTAAAAAETPRNPSAMKATVKGRYEGDKATAAATLALSAAGDLRFRASATDAAFAAGPSLDGLTLTLEKPGSFLLDLKPNNQDVRFQFMNSAVVLDKKVSLTYTHSTSLAPKPAPATSPSAAPAPPPKAAAPPNRTALDLSIAFDPANKVGVSHALGSGGCRVKYSYAHGAGRLTTVEPTFDTAKNAWEFAVARRFDGGDAVRGTYQASTKQLGLEWTRSSSIGGSFKVATTFDLSDQSKAPKLVAESTWNYEI	0.99	1.05	1.002	1.01	1.064	0.96	1.07, 0.98, 0.93, 1.02, 0.95	0.98, 1.06, 1.11, 1.03, 1.07	1.07, 0.94, 1.01, 1.04, 0.95	0.99, 0.95, 1.09, 1.02, 1.0	0.91, 1.08, 1.19, 1.01, 1.13	1.09, 0.89, 0.92, 1.01, 0.89	0.0250998	0.0216795	0.0251794	0.0230217	0.0485386	0.0392428
p9833	TPM=422.48 Putative ortholog: Os03g10340 40S ribosomal protein S3a, putative, expressed comp315_c0_seq1_g1611	ATAG[IL]FP[IL]QNVYVR, VDRPAEGDEAMATEEVAAAAE, VFEVS[IL]AD[IL]QGDEDQAFR	3	MAVGKNKRISKGRKGSKKKAVDPFTKKDWYSIKAPTLFNTRNIGMTLVSRTQGTKIASEGLKHRVFEVSLADLQGDEDQAFRKIRLRAEDVQGKNVLTNFWGMDFTTDKLRSLVKKWQTLIEAHVDVKTTDNYMLRLFCIGFTKRRPNQVKRTCYAQASQIRQIRRKMVEIMANHASTCDLKELVAKFIPEVIGKDIEKATAGIFPLQNVYVRKVKILKAPKFDIGKLMEVHGDYNKEDVGVKVDRPAEGDEAMATEEVAAAAE	1.11667	1.09333	1.10667	0.996667	0.983333	1.01333	1.11, 1.26, 0.98	1.09, 1.21, 0.98	1.06, 1.23, 1.03	0.96, 0.97, 1.06	0.98, 0.96, 1.01	0.98, 1.01, 1.05	0.0808977	0.0664162	0.0622718	0.031798	0.0145297	0.0202759
p10519	TPM=69.97 Putative ortholog: Os09g16910 cysteine desulfurase 1, mitochondrial precursor, putative, expressed comp2060_c0_seq1_g200	ATE[IL]TVHQV[IL]K, VDDVV[IL]NGSMEHR	2	RALSTAALPADAPTPAADEDDDAITIKGVRISGRPLYMDMQATTPVDPRVLDAMLPFYLSQYGNPHSRTHLYGWESDAAVESARAQVAALVGADPREIFFTSGATECNNIAVKGAMHFYRDRRRHVITTQTEHKCVLDSCRHLQQEGFDVTYLPVRPDGLVDVAQLRDAIRPDTGLVSVMAVNNEIGVVQPLEEIGRLCREKGVHFHTDAAQALGKIPINVNQMGIGLMSLSAHKIYGPKGVGALYLRRRPRIRVEPQMSGGGQERGIRSGTVPTPLVVGFGAACEIASREMDYDERRVSALQRRLLDGIRARVDDVVINGSMEHRYSGNLNLSFAYVEGESLLMGLKEVAVSSGSACTSASLEPSYVLRALGVDEDMAHTSIRFGIGRFTTEAEVDRA…	0.915	0.845	0.85	0.935	0.935	1.01	0.89, 0.94	0.91, 0.78	0.86, 0.84	0.97, 0.9	1.03, 0.84	0.94, 1.08	0.025	0.065	0.01	0.035	0.095	0.07
p58573	TPM=99.04 comp1072_c0_seq2_g939	ATGMDGN[IL]PGG[IL]AAQAQSAADANAWAAR, AT[IL]GDV[IL]SHATAK, YGDVFPAVSGG[IL]AK, [IL]T[IL]GEA[IL]EAAGFAAGTRPVER	4	MSISRFSCTHLVVATRQIVSRRFLAKMSQAQPRRPASSEQGQDGAIRYGDVFPAVSGGLAKKPVAPQDAATMQSAETLAFGETIKGGPAATMQSAATRNERMGVVAHDQATDVAAEQGVSVSETRVPGGRIITEFVGGQAVGQYLEPDAAAAAAGGGVDETKITIGEALEAAGFAAGTRPVERSDAAAIQAAEVRATGMDGNIPGGLAAQAQSAADANAWAARDVDKATLGDVLSHATAKLAADKEVETDDAARVAFAETRNKQDVTARPGGVAASMATAARLNK	0.955	0.9925	1.005	1.0525	1.04	1.0125	1.04, 0.88, 0.94, 0.96	1.09, 0.9, 0.99, 0.99	1.13, 0.91, 1.09, 0.89	1.09, 1.03, 1.16, 0.93	1.05, 1.02, 1.06, 1.03	1.04, 1.01, 1.09, 0.91	0.0330404	0.0388104	0.0613052	0.0487126	0.00912871	0.0379418
p57667	TPM=611.99 comp84_c0_seq3_g1049	ATNT[IL]T[IL][IL]DSG[IL]GMTK, DDQ[IL]DY[IL]EER, EVSHEWS[IL][IL]NK	3	LIINTFYSNKEIFLRELISNSSDALDKIRFESLTDKSKLDAQPELFIHIIPDKATNTLTLIDSGIGMTKSDLVNNLGTIARSGTKEFMEALAAGADVSMIGQFGVGFYSAYLVAERVVVTTKHNDDEQYVWESQAGGSFTVTRDAGEPLGRGTKITLYLKDDQLDYLEERRLKDLVKKHSEFISYPISLWTEKTTEKEISDDEDEDEKKDTEEGKVEEIDEEKEEKEKKKKKIKEVSHEWSLINKQKPIWMRKPEEITKEEYAAFYKSLTNDWEEHLAVKHFSVEGQLEFKAVLFVPKRAPFDLFDNKKKANNIKLYVRRVFIMDNCEELIPEYLSFVKGIVDSEDLPLNISRETLQQNKILKVIRKNLVKKCIELFFEIAENKEDYNKFYEAFSKNLK…	0.94	0.966667	0.936667	0.993333	1.03	0.973333	0.93, 0.93, 0.96	0.88, 0.94, 1.08	0.9, 1.0, 0.91	0.97, 1.07, 0.94	0.95, 1.01, 1.13	1.02, 1.06, 0.84	0.01	0.0592546	0.031798	0.0392994	0.052915	0.0676593
p105237	TPM=14.01 comp19058_c0_seq1_g539	ATTET[IL]SQGFGFPESR, EV[IL]PGD[IL]G[IL]SASAK	2	DGRTTEENKATTETLSQGFGFPESRGEFSSVQESGLDLESYTSSRREETEENTPMRKSESTGKEVLPGDIGLSASAKPLFSDKDNLVQEKREGGFSVQNSGQQSFESKNWNKEEEDGRSTEENKSAKETPSQGVNFPEPPAPTPGGDDDNVVQEMGGVFFVQNPGQQLVQSKNEKEEDDGKTREENKSN	1.185	1.185	1.05	0.885	0.99	0.895	1.41, 0.96	1.44, 0.93	1.23, 0.87	0.87, 0.9	1.02, 0.96	0.85, 0.94	0.225	0.255	0.18	0.015	0.03	0.045
p3030	TPM=46.13 SignalP=yes Putative ortholog: Os09g30010 fasciclin domain containing protein, expressed comp2914_c0_seq1_g1176	ATV[IL]DADPVAVYAVDR, SNNGVMNT[IL]ATDGAAK	2	MHLAAAILSVALVLPLAAAAVGKATAAAPAAPSAPPNVMAAMAKGGCKAFAALIASSPDAASTYASAAGGGMTVFCPSDDAVAAFAPRYKNLTADGKASLLLFHAVPVYYSPGSLKSNNGVMNTLATDGAAKNYNFTLQNEGNVVTIKTGASGAVARVKATVLDADPVAVYAVDRVVQPVELFKPAPSPTPAPAPAPAA	0.95	0.985	1.025	1.075	1.04	1.035	0.97, 0.93	0.98, 0.99	1.03, 1.02	1.06, 1.09	1.01, 1.07	1.05, 1.02	0.02	0.005	0.005	0.015	0.03	0.015
p8302	TPM=929.68 Putative ortholog: Os10g40730 expansin precursor, putative, expressed comp37_c0_seq1_g1153	ATWYGQPEGAGPDDNGGACGFK, HSG[IL][IL]D[IL]EFTR, VPCEFPG[IL]K, [IL]AKPG[IL]NDK	4	MYPIWPINSPTAPRPPPHSSTGTKHHYSLPHCTGTLHSPDPHSTRRGMGTLPSLAALAALLLSFPAVGGAVDGGVEYDTSTDLTPAGADWNASDATKYWGPWTPARATWYGQPEGAGPDDNGGACGFKHVNRYPFMSMGSCGNQPLFKDGKGCGSCYKIRCRKDQSCSGRTETVIITDMNYYPVAPFHFDLSGTAFGRLAKPGLNDKLRHSGIIDIEFTRVPCEFPGLKIGFHVEEYSNPVYFAVLVEYEDGDGDVVQVDLMESRGPGGGRWTRMRESWGSIWRLDSNHRLQAPFSIRIRNESGKTLVANKLIGTTVDARSEYTTSSNGVALSNCIVLGGVCRCVFLGEASSLSGDSPEFGWVRVHGARSLSMEAMDRVLGKRAAWDNGGGKRTRYALP…	1.1525	1.3225	1.05	0.9025	1.14	0.8075	1.23, 0.95, 1.49, 0.94	1.3, 0.95, 1.85, 1.19	1.16, 0.96, 1.39, 0.69	0.94, 1.01, 0.93, 0.73	1.06, 1.0, 1.24, 1.26	0.89, 1.01, 0.75, 0.58	0.131045	0.190411	0.148717	0.0601907	0.0648074	0.09259
p7705	TPM=130.52 Putative ortholog: Os06g04460 hypersensitive-induced response protein, putative, expressed comp1300_c0_seq1_g1613	AV[IL]EE[IL]EK, Y[IL]SGVG[IL]AK, [IL]Q[IL]ASVYK	3	MVSAFFLFCGCVEQANVAVVEKWGRFLRLAEPGLHFFNPCAGEFVAGTLSTRVQSLDVRVETKTKDNVFVHLICTIQYRVVKENADDAYYELQNPQQQIQSYVFDVVRAIVPRMELDNLFEQKNDVAKAVLEELEKVMSDYGYSIEHILLVDIIPDAAVRKAMNDINAAQRLQLASVYKGEAEKIHLVKKAEGESEAKYLSGVGIAKQRQAITDGLRENILNFSHSVSGTTAKEVMDLIMVTQYFDTIKELGDNSKNTTVFIPHGPGHVKDIGDQIRNGVMEASCSNV	0.913333	1.05333	0.926667	1.02	1.15333	0.883333	0.9, 0.95, 0.89	1.03, 1.0, 1.13	0.94, 0.9, 0.94	1.05, 0.96, 1.05	1.14, 1.06, 1.26	0.92, 0.9, 0.83	0.0185592	0.0392994	0.0133333	0.03	0.0581187	0.0272845
p6431	TPM=128.81 Putative ortholog: Os05g45950 outer mitochondrial membrane porin, putative, expressed comp882_c0_seq1_g287	AVA[IL]GVDAAFDTASGDFTK, FG[IL]A[IL]S[IL]KP, FNNFG[IL]ASA[IL][IL]QHAWR, FT[IL]TTTAANGAA[IL]TVAGTK, S[IL][IL]TFSTE[IL]DTK, V[IL]TTVT[IL]NE[IL]YTPG[IL]K	6	PFASSQEHNGHRHPRQDAAPSFSSRKRSHLPPCLHPKSHSPLISPPSSRRPPLAMDSPAAVPVPAAGPVGPGLYTEIGKKARDLLYKDYHTDQKFTLTTTAANGAAITVAGTKKNEVVFSEIQSQLKGKKYTVDVKATSDSKVITTVTINELYTPGLKGIISVPTPYQKSSTGKVELQYLHPHAGINASVGLNANPLVNFSGVFGTKAVALGVDAAFDTASGDFTKYNAGLSHTNQDLTASLNLNNKGDTLAASYYHQVHGTTAVGAEIAHTFSSNENTLTIGSQHELDPLTTVKARFNNFGIASALLQHAWRPKSLITFSTEIDTKAIEKSPKFGLALSLKP	0.966667	1.03333	1.00333	1.03667	1.06667	0.971667	1.0, 0.88, 0.93, 1.04, 0.96, 0.99	1.1, 0.97, 0.95, 1.06, 1.04, 1.08	1.08, 0.95, 0.89, 1.07, 0.98, 1.05	1.08, 1.07, 0.96, 1.03, 1.02, 1.06	1.1, 1.09, 1.02, 1.01, 1.08, 1.1	0.98, 0.98, 0.94, 1.01, 0.95, 0.97	0.0230458	0.0247207	0.030948	0.0180123	0.0166667	0.0101379
p15049	TPM=26.63 Putative ortholog: Os09g27210 lecithine cholesterol acyltransferase, putative, expressed comp5477_c0_seq1_g945	AVAG[IL]FSSEAK, A[IL]APEV[IL]DSDF[IL]G[IL]QT[IL]R, DVAEAPVSD[IL]EQ[IL]EFR, DVNGEPVEVHPEPVNYGR	4	PPPRPGRRCDRARDGSPAPIPLAPAMSLLRRRKQPQPPPPPSPGDDSNGSDHDDKDKGKTPAQPPSTSSAAPATPPPKRAKAKPWSCVDSCCWLVGCVCSAWWLLLFLYNAMPASFPQYVTEAITGPLPDPPGVKLHKEGLRARHPVVFVPGIVTGGLELWEGHQCAEGLFRKRLWGGTFGDVYKRPLCWVEHMSLDNETGLDKPGIRVRPVTGLVAADYFVPGYFVWAVLIANLARIGYEEKNMYMAAYDWRLSFQNTEVRDQTLSRIKSNIELLVATNGGNRVVVIPHSMGVLYFLHFMKWVEAPSPMGGGGGPNWCAKHIKAVTNIGGPFLGVPKAVAGLFSSEAKDVAVARAIAPEVLDSDFLGLQTLRHLMRMTRTWDSTMSMIPKGGETIWGG…	1.1775	1.075	1.1075	0.95	0.925	1.0425	0.95, 1.25, 1.33, 1.18	1.02, 1.25, 0.96, 1.07	1.02, 1.11, 1.16, 1.14	1.07, 0.89, 0.87, 0.97	1.07, 1.0, 0.72, 0.91	1.01, 0.89, 1.21, 1.06	0.0817899	0.0625167	0.0309233	0.0454606	0.0757738	0.0662539
p7463	TPM=934.96 Putative ortholog: Os03g14450 enolase, putative, expressed comp175_c0_seq2_g1053	AVDNVNS[IL][IL]GPA[IL][IL]GK, DQTYD[IL]NFK	2	MAAVTIQSVKARQIFDSRGNPTVEVDVCCSDGTFARAAVPSGASTGVYEALELRDGGKDYLGKGVLKAVDNVNSIIGPALIGKDPTEQTLLDNFMVHELDGTKNEWGWCKQKLGANAILAVSLAVCKAGASVKKIPLYQHIANLAGNKHLVLPVPAFNVINGGSHAGNKLAMQEFMILPTGASSFKEAMKMGVEVYHNLKSVIKKKYGQDATNVGDEGGFAPNIQENKEGLELLKVAIEKAGYTGKVVIGMDVAASEFYSEKDQTYDLNFKEDNNDGSQKISGDSLKNVYKSFVDEYPIVSIEDPFDQDDWVHYAKMTAEIGVPVQIVGDDLLVTNPTRVAKAIEEKSCNALLLKVNQIGSVTESIEAVRMSKRAGWGVMTSHRSGETEDTFIADLAVG…	0.93	1.015	0.915	0.985	1.095	0.9	0.94, 0.92	0.99, 1.04	0.87, 0.96	0.93, 1.04	1.06, 1.13	0.88, 0.92	0.01	0.025	0.045	0.055	0.035	0.02
p2773	TPM=60.43 TMHMM=4 Putative ortholog: Os08g32980 expressed protein comp2624_c0_seq1_g124	AVDVSGEDT[IL]PGV[IL]R, D[IL][IL]AWTK, SFVDGVWSPGADGDP[IL][IL]R	3	MAESGESATKMANGEVSDGRAVDVSGEDTLPGVLRSFVDGVWSPGADGDPLLRRLRTASCESAPRLREASKNSARDLLAWTKQGSGLRAILVISVGTITLIALTGLLIFMSFLLVATANAIVVSVLMSLAAAGGFLALFFACLVAVYVGAVSVAIFVISATVISAIVAVMIATGWIGFFWTIWFAARKSMDLTKHSIGMTTSAMQSYSASRHVREKPAE	1.02	1.12333	1.04667	1.03333	1.10667	0.933333	1.07, 0.92, 1.07	1.04, 1.15, 1.18	1.07, 1.01, 1.06	1.0, 1.1, 1.0	0.97, 1.24, 1.11	1.02, 0.88, 0.9	0.05	0.0425572	0.0185592	0.0333333	0.0779601	0.0437163
p8888	TPM=62.42 Putative ortholog: Os04g55720 D-3-phosphoglycerate dehydrogenase, chloroplast precursor, putative, expressed comp895_c0_seq1_g1036	AVMA[IL]GVDEEPSK, T[IL]A[IL][IL]GFGK, [IL]GE[IL]PA[IL]EEFVF[IL]K	3	ASAAVAVEGKPTVLVAEKLGAAGLALLREFANVDCSYGLSPEELRAKISLCDALIVRSGTKVGRDVFEASGGRLRVVGRAGVGIDNVDLAAATEHGCLVVNAPTANTVAAAEHGIALLCGMARNIAQADASLKAGKWARNKYVGVSLVGKTLAILGFGKVGSEVARRAKGLGMHVIAHDPYASADRARAIGVELVSMEEAMTTADFISLHMPLTPATDKMLNDEAFAKMKKGVRIINVARGGVIDEDALVRALDAGIVAQAALDVFTKEPPAADSKLVLHENVTVTPHLGASTVEAQEGVAIEIAEAVTGALKGELAASAVNAPMVPAEVLSELAPFVVLAEKLGRLAVQLVAGGGGIKSVKVTYASARAPDDLDTRLLRAMITKGVIEPISDAFVNLV…	1.00667	1.03	0.963333	0.96	1.02667	0.936667	1.08, 0.95, 0.99	1.06, 0.99, 1.04	0.9, 1.1, 0.89	0.83, 1.16, 0.89	0.99, 1.04, 1.05	0.85, 1.11, 0.85	0.0384419	0.0208167	0.0683943	0.101489	0.0185592	0.0866667
p3496	TPM=54.88 TMHMM=3 Putative ortholog: Os02g21080 AGAP008475-PA, putative, expressed comp3579_c0_seq1_g928	AVPFSF[IL]QPPR, SEFDSMDP[IL]FHV[IL]R	2	MAPRSEHAAGSAAAAASAAAQGHRSEFDSMDPLFHVLRAVPFSFLQPPRTRLKLPSNLALPSPMTVFALILLTYFAVVSGLVYDVIVEPPGIGSSQDPATGAVRPVVFLPGRVNGQYIIEGLSSGFMFLLGGVGIILLDLAVDRTRPRSLRISFGGSGVAAIVIAYAMAMLFLRIKIPGYLW	0.97	0.955	0.925	0.96	0.985	0.97	0.98, 0.96	0.95, 0.96	0.89, 0.96	0.91, 1.01	0.97, 1.0	0.94, 1.0	0.01	0.005	0.035	0.05	0.015	0.03
p7330	TPM=99.13 Putative ortholog: Os02g37420 ras-related protein, putative, expressed comp683_c1_seq1_g786	AVSYEEGEQFAK, TAQNVEEAF[IL]K, Y[IL][IL][IL]GDTGVGK, [IL]QDGVFDVSNESYG[IL]K	4	MSYAYLFKYIIIGDTGVGKSCLLLQFTDKRFQPVHDLTIGVEFGARMITIDNKPIKLQIWDTAGQESFRSITRSYYRGAAGALLVYDITRRETFNHLASWLEDARQHANANMTVMLIGNKCDLSHRRAVSYEEGEQFAKENGLVFMEASAKTAQNVEEAFIKTAGTIYKKIQDGVFDVSNESYGIKVGYAVPNASGGGAGSSSQAGLFSKHSGVSSPDGPGSGNLNRLTPLQAGFGTACPGNGKGLYCNLGASKYYIKCLCNWIWKRASWHSNHNASYYTSEDHNVQQSSAPPATTAPTTTAAPTPHRFPCSRLLRLHPWCFLNQQSLQCELHSLQMSIHADVNTGDGAVDGGSVLELDGHRLVVQLHQEPDELHRGGGGGEEEAEADGIEGELELFAF…	0.9625	1.005	1.04	1.0825	1.0375	1.0575	0.88, 1.0, 0.95, 1.02	0.78, 1.15, 1.01, 1.08	1.05, 1.07, 0.94, 1.1	1.2, 1.06, 0.99, 1.08	0.89, 1.14, 1.06, 1.06	1.35, 0.93, 0.93, 1.02	0.0311916	0.08026	0.0348807	0.0436606	0.0526585	0.099781
p6156	TPM=180.36 SignalP=yes Putative ortholog: Os03g62490 prohibitin-2, putative, expressed comp946_c0_seq1_g1589	AVVAQYNASQ[IL][IL]TQR, SAE[IL][IL]GQA[IL]ANNPAFVA[IL]R, VF[IL]DSSD[IL][IL][IL]G[IL]QQ[IL]N[IL]AGK, VYPEGTH[IL][IL][IL]P[IL][IL]ER, V[IL]PS[IL][IL]HET[IL]K	5	MNKIKAPAGAGAMVKLALAGGALWFGATNTLYNVEGGHRAIVFNRFEGIKDKVYPEGTHLIIPLIERPIIYDVRARPNLVESTSGSRDLQMVRIGLRVLTRPMPEKLPTMYRTLGENYNERVLPSIIHETLKAVVAQYNASQLITQREAVSREIRKILTERAKNFNIALDDVSITSLSFGKEFTHAIEAKQVAAQEAERAKFIVEKAEQDKRSAIIRAQGEAKSAELIGQAIANNPAFVALRQIEAAREIAHTISSSSNKVFLDSSDLLLGLQQLNIAGKGKK	0.99	1.024	1.004	1.026	1.046	0.982	1.19, 1.03, 0.92, 0.96, 0.85	1.01, 1.06, 1.1, 1.01, 0.94	0.98, 0.98, 1.06, 0.98, 1.02	0.83, 0.95, 1.14, 1.02, 1.19	0.85, 1.03, 1.19, 1.05, 1.11	0.98, 0.92, 0.96, 0.97, 1.08	0.0578792	0.0269444	0.016	0.0648537	0.056356	0.026533
p6515	TPM=203.05 Putative ortholog: Os06g37180 ATP synthase, putative, expressed comp1000_c1_seq4_g491	AVVQVFEGTSG[IL]DNK, GYPGYMYTD[IL]AT[IL]YER, Q[IL]YPP[IL]NV[IL]PS[IL]SR, TVSGVAGP[IL]V[IL][IL]DK, VT[IL]F[IL]N[IL]ANDPT[IL]ER, YTTVQFTGEV[IL]K	6	LPPPPPPLLAPASSSPTRSTTTSSSRSSPSPTDPDPRSPSGGFSMGLVKDGVDMEEGTLEIGMEYRTVSGVAGPLVILDKVKGPKYQEIVNIRLGDGTTRRGQVLEVDGEKAVVQVFEGTSGIDNKYTTVQFTGEVLKTPVSLDMLGRIFNGSGKPIDNGPPILPEAYLDISGSSINPSERTYPEEMIQTGISTIDVMNSIARGQKIPLFSAAGLPHNEIAAQICRQAGLVKRLEKGKHAEGGGEDDNFAIVFAAMGVNMETAQFFKRDFEENGSMERVTLFLNLANDPTIERIITPRIALTTAEYLAYECGKHVLVILTDMSSYADALREVSAAREEVPGRRGYPGYMYTDLATIYERAGRIEGRTGSITQIPILTMPNDDITHPTPDLTGYITEGQI…	0.973333	1.01667	1	1.03	1.045	0.983333	1.0, 0.96, 0.96, 1.01, 0.96, 0.95	1.08, 0.95, 0.95, 1.04, 1.05, 1.03	1.17, 0.99, 0.9, 0.97, 1.02, 0.95	1.17, 1.03, 0.94, 0.96, 1.07, 1.01	1.08, 1.0, 0.98, 1.04, 1.09, 1.08	1.08, 1.04, 0.95, 0.92, 0.98, 0.93	0.0102198	0.022161	0.0377712	0.0339608	0.0189297	0.0261619
p1545	TPM=34.69 TMHMM=7 Putative ortholog: Os03g17310 calcium-transporting ATPase, endoplasmic reticulum-type, putative, expressed comp1658_c0_seq1_g896	AVVSADAD[IL]QAK, A[IL][IL][IL]SS[IL]SEMSASA[IL]R, E[IL]VPGDVVQVR, MG[IL]PGGYTPSQDSSD[IL][IL]R	4	MGEAGHDAPPPAMNDDSSSFPAWARTVEECAKRFNVHVTHGLTTADAAARLRTHGANELHEHPGPTTLHLILQQFDDTLVRILLAAAAVSFLLALSSSAGALTPSAFVEPLVIFLILVVNAAVGVWQETNASKALDALRRIQSDHAAVLRDGRWVPALPARELVPGDVVQVRVGDKVPADMRVARLVTSTLRVEQGSLTGETNSVNKTARAVVSADADIQAKDCMVFAGTTVANGGAVCLVIHTGMSTEIGKIHSQIQEAAQEEDDTPLKKKLNEFGEALTAIIGVICILVWLINVKYFLTWEYVDGWPTNFKFSFEKCTYYFEIAVALAVAAIPEGLPAVITTCLALGTRKMAQKNALVRKLPSVETLGCTTVICSDKTGTLTTNQMSAVRLVAVGRW…	1.0325	1.03	1.0575	1.02	0.99	1.0575	1.17, 0.91, 0.95, 1.1	1.44, 0.89, 0.86, 0.93	1.22, 0.82, 0.96, 1.23	1.04, 0.91, 1.01, 1.12	1.23, 0.98, 0.9, 0.85	0.85, 0.93, 1.12, 1.33	0.0614241	0.137417	0.100861	0.0433974	0.0843603	0.107034
p44602	TPM=78.94 TMHMM=1 SignalP=yes comp1932_c0_seq1_g277	AWASMADNDP[IL]K, AWASMADNDP[IL]KR	2	AARHQQEAPSVMWPEMKAWASMADNDPLKRGSSSSPLRRMSPTTMAMGGLLVVCTLGYFMLSKDDRRKAADDRHNERLAHRP	0.98	1.055	0.995	1.015	1.075	0.945	1.0, 0.96	1.05, 1.06	0.98, 1.01	0.98, 1.05	1.05, 1.1	0.93, 0.96	0.02	0.005	0.015	0.035	0.025	0.015
p9278	TPM=215.86 Putative ortholog: Os07g47290 xylose isomerase, putative, expressed comp395_c0_seq1_g374	AWPWEDGTNS[IL]AMAK, CGDGAADDWEGEFFPG[IL]SK, EGYQT[IL][IL]NTDMK, T[IL]AETNAN[IL]DE[IL]VE[IL]AK, VYAYAAAQVK, V[IL]EWGEP[IL]VPSGK, WYNAEEV[IL][IL]GK, YG[IL]TGEFK, YQSFDSE[IL]GAM[IL]EAGK, [IL]GFNG[IL][IL][IL][IL]EPK, [IL][IL]EDGS[IL]DE[IL]VR	11	MRGAKLLVLLVASSLCLYATIAAQETCPADLDAKCGDGAADDWEGEFFPGISKIKYEGPTSKKPLAYKWYNAEEVILGKKMKDWLRFSVAFWHTFRGTGGDPFGAATKAWPWEDGTNSLAMAKRRMKAHFEFMEKLGVDRWCFHDRDIAPDGKTLAETNANLDEIVELAKQLQDETNIKPLWGTAQLFMHPRYMHGAATSPEVKVYAYAAAQVKKALEVTHYLGGENYVFWGGREGYQTLLNTDMKRELEHLANFLQAAVDHKKKIGFNGILLIEPKPQEPTKHQYDWDVATTFSFLQKYGLTGEFKINVECNHATLSGHSCHHELETARINDLLGNIDANTGDPQVGWDTDEFLTDISEATLVMSSVVKNGGLAPGGFNFDAKLRRESTDVEDMFIAH…	1.03545	1.09273	1.04182	1.00364	1.05545	0.956364	1.1, 1.13, 0.97, 1.02, 0.98, 1.0, 0.95, 1.0, 1.11, 1.02, 1.11	1.16, 1.28, 1.07, 1.03, 0.97, 0.92, 1.05, 1.07, 1.16, 1.23, 1.08	1.06, 1.08, 0.92, 0.92, 0.98, 0.97, 1.0, 0.96, 1.2, 1.18, 1.19	0.96, 0.95, 0.95, 0.9, 0.99, 0.97, 1.05, 0.96, 1.08, 1.16, 1.07	1.06, 1.13, 1.11, 1.01, 0.98, 0.92, 1.11, 1.07, 1.04, 1.21, 0.97	0.91, 0.85, 0.85, 0.9, 1.01, 1.05, 0.95, 0.9, 1.04, 0.96, 1.1	0.0195105	0.0323079	0.0323284	0.0230522	0.0250949	0.025308
p54400	TPM=7.12 TMHMM=1 SignalP=yes comp8867_c0_seq1_g179	AWVTAQD[IL]ADTFNPPFR, VSQ[IL]GDEAPGVPR	2	MGAFSYHAAGMVLLMVAILALPRIAVAGNPPFSCAPGATQGYAFCDRRLPVEQRAADLVARLSLAEKVSQLGDEAPGVPRLGVPPYKWWSEGLHGLAFWGHGMHFDGAVRAITSFPQVLLTAASFDEKLWYRIGQAIGTEARALYNIGQAEGLTIWSPNVNIFRDPRWGRGQETPGEDPTTASKYGVAFVRGLQGPSPTILQTSACCKHATAYDLEAWNGAIRYDYKAWVTAQDLADTFNPPFRSCVEEGKASCVMCAYTTVNGVPACASSDLLTKTFKGAWGLNGYVSSDCDAVALMHDSQGYRSTPEDTVAAALTAGLDLNCGNYTQVHGMAAIQQGKMSEHDVDRALRNLFTVRMRLGHFDGDPRGSALYG	0.97	0.98	0.99	1.035	1.02	1.02	1.04, 0.9	0.91, 1.05	0.98, 1.0	0.95, 1.12	0.87, 1.17	1.08, 0.96	0.07	0.07	0.01	0.085	0.15	0.06
p6647	TPM=75.1 Putative ortholog: Os01g40470 vacuolar ATP synthase subunit d, putative, expressed comp1509_c0_seq1_g705	AY[IL]EDFYK, [IL]SYGESQM[IL]DK	2	RQLSPGSATHQPPDPSRRAPAIRCYHRRDPSAGAAKMYSWEMLSFNIHDGFLEAIVRGNRSGLLTAADYNNLCQCETLDDIKMHLSATEYGPYLQNEPSPLHTTTIVEKCTLKLVDEYKHMLCQANEPLSTFLQYITYGHMIDNVVLIVTGTLHERDVNELLEKCHPLGMFDSIASLAVAQNMRELYRLVLVDTPLAPYFSECITSEDLDDMNIEIMRNTLYKAYLEDFYKFCAKLGGATAEIMCDLLSFEADRRAVNITINSIGTELTRDDRRKLYSNFGLLSPYGHEELAVCEDVDQVRGVMEKYPPYQSIFAKISYGESQMLDKAFYEEEVRRLCLSFEQQFHYAVFFSYMRLREQEIRNLMWISECVAQNQKNRVHDSVVFIF	0.91	0.975	0.97	1.07	1.075	0.995	0.97, 0.85	0.98, 0.97	0.99, 0.95	1.02, 1.12	1.01, 1.14	1.01, 0.98	0.06	0.005	0.02	0.05	0.065	0.015
p16746	TPM=31.47 Putative ortholog: Os01g53700 mitochondrial-processing peptidase subunit, mitochondrial precursor, putative, expressed comp4761_c0_seq1_g541	AYVPEMVEV[IL][IL]DSVR, D[IL]EA[IL]T[IL]ND[IL]SSTAK, EF[IL]FENYTAPR, EVES[IL]GGNVSASASR, P[IL]MAPESA[IL]HR	5	KATLLVGLNPPPSTPHGVVNSLPPRRRPPLISLPVATPRPPSSRAAAAMHRIAGSHLRRALKQHGSSRFASTSVVKQSSGGLFGWLLGGKPTQLPTLDVPLPGITLPPALPDFVEPAKTKVTTLPNGIKIASETSMSPAATVGLYIDCGSMYETPDSSGASHLLERMAFKSTTNRSHLRLVREVESIGGNVSASASREQMSYTYDAFKAYVPEMVEVLIDSVRNPVFFDWEIKEQLQKIKAEIAEVSNNPQGLLIEALHSAAYSGALAKPLMAPESAIHRLDSSILKEFIFENYTAPRMILAASGVEHDLLVSVAEPLLSDLPGVKRPEEPKSVYVGGDYRCQADSQDTHVALAFEVPGGWYEEKTAVVVTVLQMLMGGGGSFSAGGPGKGMHSRLYLR…	1.002	1.026	1.026	1.03	1.028	1.02	0.88, 0.98, 1.13, 0.94, 1.08	1.04, 1.16, 1.08, 0.82, 1.03	0.93, 0.98, 1.08, 1.18, 0.96	1.06, 1.0, 0.95, 1.25, 0.89	1.19, 1.18, 0.95, 0.87, 0.95	0.89, 0.85, 1.0, 1.43, 0.93	0.0456508	0.056356	0.046	0.0617252	0.0657571	0.105451
p9966	TPM=157.13 Putative ortholog: Os02g40830 succinyl-CoA ligase beta-chain, mitochondrial precursor, putative, expressed comp858_c0_seq1_g241	CDV[IL]ASG[IL]VNAAK, ESG[IL]T[IL][IL]TAED[IL]DDAAEK, FG[IL]NVPK, M[IL]NQV[IL]VTK, SDCTM[IL]E[IL]NP[IL]AETADK, VPVDVFK, [IL]NFDDNAAFR, [IL]N[IL]HEYQGAD[IL]MGK	8	MVRGSLGRLASRAVSVGGKWQHQQLRRLNIHEYQGADLMGKFGINVPKGAVVGSVQEVKDVLKNVFPSEKEIVVKSQILAGGRGLGTFKSGLQGGVHIVKAEEAESLAAKMLNQVLVTKQTGPQGKVVGKVYLCEKMSLVNEMYFAITLDRQTAGPLIIACSKGGTSIEDLAEKYPDMIIKVPVDVFKGITDEDAGKVVDGLAPKTADRQSSIEQIKKLYELFCKSDCTMLEINPLAETADKKLVAADAKLNFDDNAAFRQKEIFALRDTTQEDPREVAAAKADLNYIGLDGEIGCMVNGAGLAMATMDIIKLHGGTPANFLDVGGSASEGQVVEAFKILTSDDRVKAILVNIFGGIMKCDVIASGIVNAAKQVDLKVPVVVRLEGTNVDQGKRILKES…	0.94375	1.03375	0.96125	1.02	1.095	0.9425	1.08, 0.88, 1.01, 0.89, 1.06, 0.96, 0.82, 0.85	1.05, 1.23, 1.24, 0.88, 1.06, 1.02, 0.8, 0.99	0.93, 1.06, 0.94, 0.93, 1.11, 1.19, 0.84, 0.69	0.86, 1.21, 0.93, 1.04, 1.05, 1.24, 1.02, 0.81	0.97, 1.4, 1.22, 0.98, 1.0, 1.05, 0.97, 1.17	0.89, 0.86, 0.76, 1.06, 1.05, 1.17, 1.05, 0.7	0.0347921	0.0538496	0.0558837	0.0540502	0.0550649	0.0583019
p12135	TPM=52.74 Putative ortholog: Os05g49150 eukaryotic translation initiation factor 3 subunit D, putative, expressed comp3156_c0_seq6_g879	CEVHAASVDPSGAR, FNQRPQ[IL]PQR, QF[IL]T[IL]NA[IL]NEFDPK	3	MGFDVGVVPFNPDGWGPPETPAAPPLLGGAVATASIPFAPFSRSDKLGRIADWTRNPGHPGAHAAASRDSIFDFSSADDSLAAAAEDSSFSLVDAKPPPRHPRFGPKWRFNQRPQLPQRRDEEVEAKRREAEKERARRERHYQNHRSHHHQGFRGNQASQAKPSVDIQPDWTMLEQIPFANFTKLSFAVNDLPEDLLVCGAVESYDRTYDRVNPKTQRRLERFKNRHFFKITTTDDPIIRRLAEEDKATVFATDAILAALMCTPRSILSWDIVVQRVGNKLFFDKRDGAQLDLLTVNETAQEQLPENKDDINSAPSLAVEATYINQNFSQQVLVRDGEKVTFDEPNPFATENEEAASVCYRYRRWKLDDSISIIARCEVHAASVDPSGARQFLTLNALN…	1.08667	0.986667	1.00667	0.933333	0.923333	1.02667	1.22, 1.1, 0.94	0.98, 0.91, 1.07	1.02, 1.03, 0.97	0.84, 0.93, 1.03	0.8, 0.83, 1.14	1.04, 1.13, 0.91	0.0811035	0.0463081	0.0185592	0.0548736	0.108679	0.0638575
p9789	TPM=1932.71 Putative ortholog: Os12g43600 RNA recognition motif containing protein, expressed comp12_c0_seq1_g1424	CFVGG[IL]AWATDDR, GFGFVTFATDEAMR	2	MADGGAEYRCFVGGLAWATDDRGLEQAFSQYGEILDAKIINDRETGRSRGFGFVTFATDEAMRNAIEAMSGKELDGRNITVNEAQSRRSGGGGGGGGGYGGQRGGGGYGGGGGYGGGGGGYGGGGGGRGCYKCGEEGHISRDCTSRNY	0.945	0.9	0.86	0.905	0.945	0.96	0.95, 0.94	0.86, 0.94	0.88, 0.84	0.92, 0.89	0.9, 0.99	1.02, 0.9	0.005	0.04	0.02	0.015	0.045	0.06
p6499	TPM=3880.97 Putative ortholog: Os01g22490 40S ribosomal protein S27a, putative, expressed comp5_c0_seq2_g450	CG[IL]TYVYNQK, [IL]A[IL][IL]QFYK	2	DYNIQKESTLHLVLRLRGGAKKRKKKTYTKPKKQKHKHKKVKLALLQFYKVDDGTGKVTRLRKECPNAECGAGTFMANHFDRHYCGKCGLTYVYNQKA	1.12	1.14	0.99	0.935	1.07	0.875	1.48, 0.76	1.36, 0.92	1.17, 0.81	0.79, 1.08	0.92, 1.22	0.86, 0.89	0.36	0.22	0.18	0.145	0.15	0.015
p19972	TPM=21.07 Putative ortholog: Os03g20860 expressed protein comp7627_c0_seq1_g1272	D[IL][IL]NDVEESM[IL]EYK, TPAQGAEDASASPWP[IL]R	2	MASPDSGRTPAQGAEDASASPWPLRKLQSFAPGLWSQCKAYEDVFVESAKVTISDALVLASEHQAEAVGCATVAGFIFLKGPRRFLYRNTLGRFKTEKDLLNDVEESMIEYKTSIQNLRKNSKYTLDKVVIGESDLQRGRTDLRSTGKQIQSVIGSIYKAESTAAGLMDRLRTIPTRQSLELRAEVASMASDLKKQRYVLEERVNQISEYGVRV	0.99	0.96	0.93	0.95	0.97	0.97	1.02, 0.96	1.0, 0.92	0.87, 0.99	0.86, 1.04	0.98, 0.96	0.87, 1.07	0.03	0.04	0.06	0.09	0.01	0.1
p8046	TPM=72.11 Putative ortholog: Os06g02380 T-complex protein, putative, expressed comp1688_c0_seq1_g576	D[IL][IL]NV[IL]EEA[IL]R, ESTT[IL]VGDGSTQEEVSK, V[IL]AAGANPVQ[IL]TR	3	NPSSPLPAPLSSPPARPPPPPPPRRQENMASPFGATSTAGLMAAPTGIVSDKKPFSVSSISLASRPRNARPQRKCSFRVKAAKELYFNKDGSATKKLQAGVNKLADLVGVTLGPKGRNVVLESKYGSPRIVNDGVTVAREVELEDPVENIGAKLVRQAAAKTNDLAGDGTTTSVVLAQGLIAEGVKVIAAGANPVQITRGIEKTAKALVEELKKMSKEVEDSELADVAAVSAGNNYEIGNMIAEAMSKVGRKGVVTLEEGRSSENNLYVVEGMQFERGYISPYFVTDSEKMTTEYENCKLLLVDKKITNARDLINVLEEAIRGQYPILIIAEDIEQEALATLVVNKLRGSLKICAIKAPGFGERKTQYLDDIAILTGGTVIRDEVGLSLDKADKSVLGT…	1.02333	0.84	0.946667	0.926667	0.836667	1.18	0.91, 1.1, 1.06	0.99, 0.65, 0.88	0.88, 1.01, 0.95	0.97, 0.92, 0.89	1.09, 0.59, 0.83	0.89, 1.57, 1.08	0.0578312	0.100167	0.0375648	0.0233333	0.144376	0.202567
p58438	TPM=260.85 comp729_c0_seq1_g646	D[IL]AEDKD[IL][IL]K, KPVQ[IL][IL]EESGK, NAEVAGVESNNDSASGG[IL]GTR	3	KKPEKHEDDDDEKASKKKSEKTEDDEKASKKDKKEKDKKKKEDGAEGSEIEKAKKGKGSKAESKDRDLAEDKDIIKKNAEVAGVESNNDSASGGLGTREIKFTDADSRKKETDISKEKKDGKDKRKREKEKKQDEKINEKGVQGKKEDKEKENKKDKTDKKEEDKKKEKEAKNKDGDEEEEEEGKKDKATKDKKKDKTDKKEEGKKKNKDKDGDDDGEDEGKKDKEKKKKDKGAKEKTNDPAKLKKKLEKIDTKLQDLHAEKEDILRQLNGLELEAGKTTEEKKPVQILEESGKSNTKEEDLVAAL	1.02333	0.96	1.02	1	0.933333	1.21667	1.06, 1.0, 1.01	1.26, 1.06, 0.56	0.97, 1.02, 1.07	0.91, 1.02, 1.07	1.18, 1.06, 0.56	0.77, 0.96, 1.92	0.0185592	0.208167	0.0288675	0.0472582	0.189854	0.355918
p2469	TPM=64.76 TMHMM=1 Putative ortholog: Os10g25780 FAD-linked oxidoreductase protein, putative, expressed comp2316_c0_seq1_g1395	D[IL]AQGYADSFAPR, VEP[IL]VNMGQ[IL]SR	2	KKKKKKKRFLPCSCRCYRVGEGGDLVVSSSAARLKPARPPAMADLQEPLVRGKRKKSLVDYLVQFRWIFVIFFVLPVSSLIYLNIYIGDMWSAIKSEKKRQKEHEENVQKVVKRLKQRNPKKDGLVCTARKPWIAVGMRNVDYKRARHFEVDLSAFRNILEIDADRMVAKVEPLVNMGQISRATCPMNLSLAVVAELDDLTVGGLINGYGIEGSSHIYGLFSDTVVALEIVLADGRVVRATKDNEHSDLFYGVPWSQGTLGFLVSAEIKLIPVKEYMRLTYTPVKGSLKDIAQGYADSFAPRDGDPSKVPDFIEGMVYTQTEGVMMTGVYASKEEAKKKGNTINSVGWWFKPWFYQHAQTALDKGEFVEYIPTRQYYHRHTRCLYWEGKLILPFGDQFW…	1.08	1.035	1.075	0.995	0.96	1.04	1.1, 1.06	1.02, 1.05	1.14, 1.01	1.04, 0.95	0.93, 0.99	1.12, 0.96	0.02	0.015	0.065	0.045	0.03	0.08
p76276	TPM=28.58 comp7665_c0_seq3_g1381	D[IL]D[IL]AMASASGVGYK, [IL]GPW[IL]Y[IL]DSSTVDPQTSR	2	MGLGGVGWRSVGSKVQRWGWENCLRLRGYSSAGLPSHMESVGFIGLGNMGSHMARNLINAGYRVSVHDVNENAMKKFSDDGIPTKRSPLEVSESSDVVITMLPSSAHVLDVYSGGNGLLGNGGRLGPWLYIDSSTVDPQTSRKISMDISRCRLKEKKGYAEKPMMLDAPVSGGVPAAEAGTLTFMVGGLEEAYVAAKPLLLAMGKKLIYCGGAGNGSAAKICNNMAMAISMLGVSEAFALGQNLGIKASTLTDIFNCSSARCWSSDTYNPVPGVLEGVPSSRNYDGGFTSKLMAKDLDLAMASASGVGYKCPMGSGALNIYQKLCEEGCDAKDFSCAFRHYYTGKDEK	0.965	0.965	1.025	1.06	0.995	1.06	0.96, 0.97	0.92, 1.01	0.94, 1.11	0.98, 1.14	0.95, 1.04	1.02, 1.1	0.005	0.045	0.085	0.08	0.045	0.04
p10243	TPM=478.99 Putative ortholog: Os01g67134 ribosomal L18p/L5e family protein, putative, expressed comp240_c0_seq1_g1280	D[IL]DQEYEGNVVASGEDFSVDPTGER, GA[IL]DGG[IL]D[IL]PHSDK, G[IL]SADDMEA[IL]YK, [IL]NA[IL]NSSAGAADDDEDDDE	4	MVFVKNQKSRAYSKRFQVKYRRRRQGKTDYRARLRLTTQDKNKYNTPKYRFVVRFTNKDVCAQIVHATIAGDIVMAAAYSHELPRYGLEVGLTNYAAAYCTGLLLARRVLKCRDLDQEYEGNVVASGEDFSVDPTGERRPFRALLDVGLLRTTTGNRVFGALKGALDGGLDIPHSDKRFAGFKKDEKQLDAEVHRKYIYGGHVAAYMRTLAEEEPEKYQSHFSEYIKKGISADDMEAIYKNVHAAIRADPTLVKSTKEAPKTHKRFNLKKLTYEQRKASLVERLNALNSSAGAADDDEDDDE	0.9775	1.1525	0.9775	1.0075	1.18	0.8625	1.07, 0.92, 0.86, 1.06	1.39, 1.04, 1.04, 1.14	0.93, 0.95, 0.93, 1.1	0.87, 1.04, 1.08, 1.04	1.3, 1.13, 1.21, 1.08	0.67, 0.92, 0.89, 0.97	0.0520216	0.0826009	0.0411045	0.046793	0.0481318	0.0662539
p2252	TPM=59.16 TMHMM=1 Putative ortholog: Os03g52650 syntaxin-related protein, putative, expressed comp2149_c0_seq1_g362	D[IL]EAGDGTE[IL]TEAGGATDER, GAV[IL]AA[IL]HE[IL]QDR, GEE[IL]MGAAVAEHGK, YYT[IL]TGEVPEDEV[IL]ER, [IL]DD[IL]VTHVDNAR	5	MNDLMTKSFMSYVDLKKAAMKDLEAGDGTELTEAGGATDERLKGFFVEVEVVKEEMSAIRDALARLHEANEEGKSLHQPDALRAHRGRVNADIVAVLRRAREIRVRIEALDRANAAQRRLSAGCGEGTTLDRTRTSVTAGLRKKLKDIMLDFQALRQRMMAEYKDTVERRYYTLTGEVPEDEVIERIISEGKGEEIMGAAVAEHGKGAVLAALHEIQDRHDAAREVERSLLELHQVFLDMAVVVESQGEKLDDIVTHVDNARDYVHTGNKELGKAREHQRGSRKCLCIGIILLLLLILIVIVPIATSLKRS	0.984	0.92	1.01	1.038	0.938	1.114	1.08, 1.06, 0.89, 1.05, 0.84	1.02, 1.01, 0.92, 0.91, 0.74	1.14, 0.97, 0.95, 0.95, 1.04	1.06, 0.92, 1.07, 0.9, 1.24	0.95, 0.95, 1.04, 0.87, 0.88	1.12, 0.97, 1.03, 1.04, 1.41	0.0494571	0.0502991	0.0364692	0.0613514	0.0305614	0.077756
p9168	TPM=2854.27 Putative ortholog: Os07g44430 peroxiredoxin, putative, expressed comp6_c0_seq1_g103	D[IL]EAYKPGCK, PG[IL]T[IL]GDTVPN[IL]E[IL]DSTHGK, VTYP[IL]MADPDR, [IL]FPQGFDTAD[IL]PSK, [IL]SF[IL]YPSCTGR, [IL][IL]G[IL]SCDDVQSHK	6	MPGLTIGDTVPNLELDSTHGKIRIHDYVGNGYVILFSHPGDFTPVCTTELAAMANYAKEFEKRGVKLLGISCDDVQSHKEWTKDIEAYKPGCKVTYPIMADPDRSAIKQLNMVDPDEKDSQGVQLPSRTLHIVGPDKKVKLSFLYPSCTGRNMDEVVRATDSLLTAAKHKVATPANWKPGECVVIAPGVSDDEAKKLFPQGFDTADLPSKKGYLRFTKV	1.11833	1.395	1.07833	0.986667	1.29	0.781667	1.33, 0.72, 1.03, 0.87, 1.33, 1.43	1.82, 0.9, 1.04, 1.8, 1.29, 1.52	1.12, 0.54, 1.1, 1.38, 1.16, 1.17	0.84, 0.74, 1.06, 1.59, 0.87, 0.82	1.37, 1.24, 1.01, 2.08, 0.97, 1.07	0.61, 0.6, 1.05, 0.76, 0.9, 0.77	0.117599	0.157305	0.115193	0.12821	0.169529	0.0704943
p7185	TPM=91.12 Putative ortholog: Os04g01290 proteasome subunit, putative, expressed comp1149_c0_seq1_g499	D[IL]F[IL]AVAR, FTAE[IL]AWADAGPDVAEPEVAR, GN[IL]ANA[IL]ST[IL]QANK, VVEDGAQGMQGVVTR, [IL]VQQPGEKPA[IL]R	5	KQPHRDLGFLLLSPPNPHTSSSSLPLRRRRRQQRRRTPAQREEPTMATIVNTTEEEPMLAVVRFTAELAWADAGPDVAEPEVARLCAEAQQHVLAARWLDMASLMLASADLLLLSPRVPDKDLECILAIICNLVTKAGSDEEALQIAEAICAKLVQQPGEKPALRIKVLFSLYNLLPSTYGKAFVYRKALEVAAAGKAADCVVPSFKNIDAFVGDWGIGKLEQRDLFLAVARILKDQKGMSKEYFNFLNKYLATFDGSSDDAGVIGEAKEEAAAAIIEFVKAADLYQCDLLDMPAVAQLEKDEKYQSVYELLKIFLTQRLDSYLEFQSANSTLLQGYGLVHEDCITKMRLMSLLDLSSHCSGEIPYSAITKALGINDDEVEYWIVKAISSKILDCKVDQ…	0.956	0.946	0.96	1.008	0.992	1.026	0.94, 0.98, 0.92, 1.0, 0.94	0.8, 1.0, 1.04, 0.94, 0.95	0.96, 1.03, 0.86, 0.89, 1.06	1.03, 1.06, 0.93, 0.89, 1.13	0.86, 1.02, 1.13, 0.94, 1.01	1.2, 1.04, 0.83, 0.94, 1.12	0.0146969	0.040694	0.0386005	0.0436348	0.0448776	0.065238
p6229	TPM=13.09 TMHMM=1 Putative ortholog: Os10g31810 expressed protein comp9704_c0_seq1_g558	D[IL]FN[IL][IL]MR, K[IL]ETFND[IL]TR	2	SSSLCPLVGAPARSLPLAVVSQSTPCSARSARMLGRGLGMSAPQWRGGALDLRAALRSGGNLLFGLFVAAVLAFTLLAAVHSPEDPLLHPSSHQLTDFLTSATSNSTFLADDSVLRTGEDFATASNSSEAASSTVVAEALPFIKLSDVGSENTEAGTEKSVTVDTDTDGNSAAGAGAAAEEEDKHIVEAVSCDTEAPVDCTGDRDLFNLLMRTAIEKFPDLHFYRFGRPVVVPESPMACDLAWRFRPAEDAKGRTTYYKDYRRFALTRDVNTCSLVVESVGEYHSGTGAKRSGKRKGKKGKKGKREAPVTTTTDFVPVKTQMRLDENAANADTTTAADQVFVVGEAVNDSMPVVASESDFSRGRYLIYMGGGERCKSMNHYIWGFLCALGEAQFLNRTL…	1.05	1.16	1.065	1.01	1.1	0.925	0.99, 1.11	1.12, 1.2	0.94, 1.19	0.95, 1.07	1.13, 1.07	0.85, 1.0	0.06	0.04	0.125	0.06	0.03	0.075
p56875	TPM=196.54 comp1757_c0_seq3_g1307	D[IL]FNVHD[IL]DMK, EKPVY[IL]SVDDGK, GSA[IL][IL]F[IL][IL]PQE[IL]K, VN[IL]D[IL]ESSASK, [IL]S[IL]TEYEFNNK	5	TLEADPPLPRFLPPPPPPPPATATMGSTKSSKKRKPVAPPPESDSEPEQTVHEAAAEESNEEEQQADAGGDGEEQQQEEEAVGEGQEETGSERKKIKQKKEKKEKEGSGILTSMLFSELPISGLTSKAVAEMNYTHLAQIQARSIPHLLAGRDVMGAAKTGSGKTLAFLIPAIELLYNLHFSPRNGTGVIVVCPTRELAIQTHNVAKELMKNHSQTLGYVIGGNGRRTEADQLAKGVNLLVATPGRLLDHLQNTKGFIYKRLKCLIIDEADRILEQNFEEDMKQIFKRLPLNRQTVLFSATQTREVEEFAKLSFEKNEERKEKPVYISVDDGKSNATVEGLQQGYCVIPSEKRFLVLYAFLKKKQSKKVMVFFSSCSSVKFHAELLNFLQIECEDIHGK…	0.994	1.13	1.022	1.028	1.136	0.91	1.01, 1.01, 1.01, 1.01, 0.93	1.12, 1.23, 1.26, 0.98, 1.06	0.96, 1.19, 1.01, 0.99, 0.96	0.95, 1.18, 0.99, 0.98, 1.04	1.11, 1.22, 1.24, 0.97, 1.14	0.86, 0.97, 0.8, 1.01, 0.91	0.016	0.0521536	0.0430581	0.0406694	0.0480208	0.03755
p8048	TPM=92.0 Putative ortholog: Os03g62260 FAD binding domain containing protein, expressed comp1861_c1_seq2_g579	D[IL]GAWEH[IL][IL]QQR, VA[IL][IL]DSNPA[IL]K, VSTVTPAT[IL]SFFR, [IL]VS[IL]AFPSK	4	MAPTPARASAAAAHALLRRTRCYAAASRIRTTARDFSSAPAGAAEPQGAPANVPGVKPGDDELDVAIVGGGMVGLAVACALSSMPLTKHLRVAIIDSNPALKSRGYLKKDGVPDSRVSTVTPATISFFRDIGAWEHILQQRHTFFGKMQVWDYTGLGYTRYNARDVCKEYLGCVVENKVLCNSLLLRLQEQKEDIEKMIYPTRLVSLAFPSKSRQGTAGLKSPPAEADSTGHTSEALHRSNLVKLDLSDGQTLYSKLVIGADGSKSNVRQTAGIKTSGWSYPQSAIICTVEHIAENDCAWQRFLPSGPIALLPIGDNFSNIVWTMSPEEASHHKSTSPEEFLKSVNHALDFGHGPHPNSSSLDRYMERLFSGIGDTAASTQECFEVPPKAIGLISDRMA…	1.01	0.9325	0.9675	0.9625	0.9275	1.0775	1.0, 1.01, 1.0, 1.03	1.02, 1.01, 0.7, 1.0	0.94, 0.91, 1.1, 0.92	0.94, 0.9, 1.11, 0.9	1.03, 1.0, 0.7, 0.98	0.92, 0.9, 1.57, 0.92	0.00707107	0.0776075	0.0446047	0.0500625	0.0765261	0.164234
p6464	TPM=149.29 Putative ortholog: Os07g33110 CAMK_CAMK_like.33 - CAMK includes calcium/calmodulin depedent protein kinases, expressed comp1791_c0_seq3_g395	D[IL]KPENF[IL][IL]ATK, D[IL]VGSAYYVAPEV[IL]R, D[IL][IL]SEVDTDNDGR, V[IL]ASN[IL]NEEE[IL]K, [IL]TSAQV[IL]QHPW[IL]R	5	GPDANRGATTCNPLPRSLRRAVLALSSLLLLRFVPDYTPQVPVRAGTAKSFRAKDLSRFSSATTPDSAQGGGANGYGYSSQPKQAQTPPSYNNNNNAQPPPQGEVRYTPPAMNAPVVPPVVAPLKPMPDTILGKQFEDVRSVYTLGKELGRGQFGVTYLCTEITTGRQYACKSISKRKLVSKADKEDIRREIQIMQHLSGQPNIVEFCGAYEDKGSVHVVMELCAGGELFDRIIAKGHYSERAAATICRGVVNVVNVCHFMGVMHRDLKPENFLLATKDENAVLKATDFGLSVFIEEGKMYRDIVGSAYYVAPEVLRRNYGKEIDVWSAGVILYILLSGVPPFWAETEKGIFDAILQGEIDFESQPWPSISESAKDLVRKMLAQDPKKRITSAQVLQHP…	0.99	1.014	0.968	0.984	1.034	0.962	0.89, 1.11, 1.0, 0.9, 1.05	1.08, 1.11, 0.95, 0.99, 0.94	0.83, 1.01, 0.91, 1.14, 0.95	0.94, 0.91, 0.91, 1.26, 0.9	1.22, 1.0, 0.95, 1.1, 0.9	0.77, 0.92, 0.96, 1.15, 1.01	0.0425441	0.0344384	0.052	0.0693253	0.0570614	0.0617576
p8252	TPM=72.21 Putative ortholog: Os10g41960 eukaryotic translation initiation factor 3 subunit B, putative, expressed comp1649_c0_seq1_g1052	D[IL]P[IL]EVFE[IL]ENK, S[IL]YTGFE[IL]FR, V[IL][IL]N[IL]FDVR, Y[IL][IL]TYSSQEPSNPR, [IL]YSQ[IL]GV[IL]K	5	MELATSMEAIHARAAELGVDLDSVDLDSITLPPGENFGILSDDEDLLQNEDIPELEMGFSNIIVVDNLPVVPPEKYEKLENVVRKIYSQIGVIKEGGLWMPTHPETQKTYGYCFIEYNTPQEAEVAREKTNGYKLDKSHIFAVNMFDDFEKYMKVPDEWAPAEIKPYTPGENLLKWLTDDKARDQFVIRAGTFTEVYWNDARRLIPELVYQKQYWTDSYIQWSPLGTHLATVHRQGAQVWGGDDKFVRLMRFAHPQVKLIDFSPGEKYLITYSSQEPSNPRDTHRVLLNIFDVRTGKVMRDFKGSADEFTSGGSMGVSGVSWPVFRWGGGKDDKYFARLGKNVISVYETDTFSLLDKKSLKVENVVDFSWSPTDPIISLFVPELGGGNQPARVSLFQMP…	0.998	0.962	0.95	0.956	0.96	1.01	1.11, 0.96, 0.87, 1.02, 1.03	1.15, 0.96, 0.69, 0.96, 1.05	0.98, 0.92, 0.92, 1.02, 0.91	0.88, 0.96, 1.06, 1.0, 0.88	1.04, 1.0, 0.8, 0.94, 1.02	0.85, 0.96, 1.32, 1.06, 0.86	0.0399249	0.0765114	0.0214476	0.0348712	0.043359	0.0863713
p80410	TPM=24.77 comp9409_c0_seq1_g681	D[IL]P[IL]TEAT[IL]P[IL][IL]D[IL]DTK, S[IL]SSESAEQESVVGTR	2	RGSDLDDSEDDSAEEVGFGSRRGSRGRGGRMSGSSGRGGREIDSDDDEDDSDDAIEFGASGKRGEKRGNLGSRRGGKVGDVDFGDRQSRGGKAFNFGSLESDSESGEADEDDGPSGFEDDLSGDDGGEEDLVNTATKKSISSESAEQESVVGTRDNGGGDSYLSQTRFDECALSPLTLKGVKAAGYERMTAVQEATLPIILKGKDVLAKARTGTGKTVAFLLPAVEVISKLPPNDHDKKRPPISVVVVCPTRELADQAAAEANKLLKFHPSIGVQLVIGGTRMALEQKRMHTNPCQILVATPGRLKDHMENTPGFATRLMGVKILILDEADRLLDMGFRTDIERIVAALPKQRQTLLFSATVPDEVRQVCHVAMKRDLEFVNTVQEGSEETHSQVKQMH…	0.935	0.995	0.905	0.97	1.055	0.92	0.93, 0.94	0.91, 1.08	0.84, 0.97	0.9, 1.04	0.97, 1.14	0.93, 0.91	0.005	0.085	0.065	0.07	0.085	0.01
p13483	TPM=46.81 Putative ortholog: Os02g58300 expressed protein comp2830_c0_seq1_g1218	D[IL]PAE[IL]S[IL]APG[IL]VSHNV[IL][IL]K, G[IL][IL]VG[IL]VK, QPQPAATTSPAE[IL]AR, TADYPAFDQ[IL][IL]K	4	MAAAAALRRAIAPGPTLLLRRQILVRLLSTSTQRQPQPAATTSPAELARIKNSIRSAATAPDDLAAHFLQALPHPAFLGDGPIFSLAVSRLVSAGRRDLVTSLLSTSLTALPAPHPSEGFLLRLIALYAQAGMPDHSLSTFRLVRPPTDRALSALLAAYHDAGQHDRAVKAFRDLPAELSIAPGLVSHNVLLKCMVATGDVAGARKVFDGMPDKAGVQPDIVSCNEVLRGYLKTADYPAFDQLLKDVTGSKKRLKPNVTTYNLRMAALCAKGRSFEAEELLDAMAANGVPPNRESFNTVIGGLCKEGEVDAATRLLKKMPEVPRPGGKGVLPNSDTYIMLLEALVEKRAFSPALEVCKECLQNKWVPPFQAVKGLIVGLVKSRKIKHAKELGMTMKKAA…	0.99	1.0075	1.0425	1.0775	1.0575	1.05	0.79, 0.93, 1.19, 1.05	1.08, 1.07, 0.81, 1.07	1.03, 1.03, 1.02, 1.09	1.3, 1.11, 0.86, 1.04	1.37, 1.15, 0.68, 1.03	0.95, 0.97, 1.27, 1.01	0.0852447	0.0658755	0.0160078	0.0909556	0.144186	0.0743864
p7636	TPM=348.34 Putative ortholog: Os01g09510 60S acidic ribosomal protein, putative, expressed comp396_c0_seq1_g1422	D[IL]TE[IL][IL]AAGR, GKD[IL]TE[IL][IL]AAGR, [IL]E[IL][IL][IL]TQVK	3	GRSTREPPGAETLEITRAPRRRRPSAPSSLPRRSKMKYIAAYLLAYLGGNSCPSAEDLTSTLESVGCEIDAERLELLLTQVKGKDITELLAAGREKFASVPSGGGGAAVAAAAPTSGGAAPAAESKKEEKVVEKEESDDDMGFSLFD	0.946667	1.00667	0.906667	0.956667	1.06667	0.9	0.96, 0.96, 0.92	1.04, 1.0, 0.98	0.98, 1.05, 0.69	1.03, 1.09, 0.75	1.09, 1.05, 1.06	0.95, 1.04, 0.71	0.0133333	0.0176383	0.110202	0.104775	0.0120185	0.0984886
p8639	TPM=303.24 Putative ortholog: Os08g02640 succinate dehydrogenase iron-sulfur subunit 2,mitochondrial precursor, putative, expressed comp493_c0_seq1_g543	D[IL]VVDMTNFYNQYK, ER[IL]DS[IL]NDEFK, [IL]DS[IL]NDEFK, [IL]DVADCGPMV[IL]DA[IL][IL]K, [IL]KNEQDPS[IL]TFR	5	IPPPPPSTTKTFSIYRWDPDSPSTKPHLKDYKIDVADCGPMVLDALIKIKNEQDPSLTFRRSCREGICGSCAMNIDGDNGLACLTKISADKSSGASTISPLPHMFVVKDLVVDMTNFYNQYKSVEPWLKRKDPQSPEKKEILQSKADRAKLDGMYECILCACCSTSCPSYWWNPEEYLGPAALLHANRWIQDSRDQYTKERLDSINDEFKLYRCHTIKNCTHACPKGLNPAKQIDTIKKLQLGA	1.066	1.134	0.97	0.926	1.07	0.868	0.96, 1.01, 0.92, 1.42, 1.02	1.16, 1.04, 0.97, 1.42, 1.08	0.89, 1.02, 0.9, 1.05, 0.99	0.93, 1.01, 0.98, 0.74, 0.97	1.21, 1.03, 1.05, 1.0, 1.06	0.77, 0.99, 0.93, 0.74, 0.91	0.0903106	0.0778203	0.0320936	0.0482286	0.0364692	0.0482079
p12068	TPM=20.12 Putative ortholog: Os01g19470 nodal modulator 1 precursor, putative, expressed comp3274_c0_seq1_g643	D[IL]YQSAVGMTS[IL]SSGSAGSR, VVDGYGAG[IL]EGANV[IL][IL]DGQ[IL]R	2	CSKDGGPSGVKVDLLSDSDELVSSTLTSSTGGYSFVNIIPGSYKLRASHPDYEIEMRGSSEADLRFGNAVVDDVFFVSGYNIHGSVVAQGNPILGVHLYLYSNDVKEVPCSQGMIGAPREGALCHAVSGADGKFSFRSIPCGNYELLPYYKGENTVFEVSPSSLPVSVEHSHMTIPEKFQVTGFSVGGRVVDGYGAGIEGANVIIDGQLRAVTDNLGYYRLDQVTSKKYTIVAEKDHYKFNSLEKFMILPNMASIDDIKSVRYDVCGVVRTVTPNSKAMVTLTHGPENVKPQRKMVSENGRFCFEVPTGEYRLSALPVDSEGFSSLMFSPGHIDVNVKSPLLDVEFSQSQVNVYGTVLCKEKCSENILLSLVRIAGGIEHEKKTTSLEQGDANFVFTKV…	1.27	0.995	1.155	0.925	0.8	1.16	1.42, 1.12	0.95, 1.04	1.12, 1.19	0.79, 1.06	0.67, 0.93	1.18, 1.14	0.15	0.045	0.035	0.135	0.13	0.02
p59865	TPM=879.8 comp147_c0_seq1_g1586	DAAEGQEGEVAAAASEEAK, GWY[IL]THYGVD[IL]GR, T[IL]DAH[IL]EEQFSGGR, [IL]DTGNFSWGSEAVTR, [IL][IL]DVVYNASNNE[IL]VR	5	HGGVGGCGARPNQSCGGAGVEGGAATDATMGISRDSMHKRRATGGKMKAWRKKRKYELGRQPANTKLSSNKTVRRVRVRGGNVKWRALRLDTGNFSWGSEAVTRKTRLLDVVYNASNNELVRTQTLVKNAIVQVDAAPFKGWYLTHYGVDIGRKKKTTAAAKKDAAEGQEGEVAAAASEEAKKSNNVQRKLEKRQQGRTLDAHIEEQFSGGRLLACISSRPGQCGRADGYILEGKELEFYMRKLQKKKGKGASA	0.906	1	0.962	1.094	1.128	0.984	1.05, 1.0, 0.91, 0.59, 0.98	1.43, 0.87, 0.87, 0.9, 0.93	1.12, 0.92, 0.85, 0.9, 1.02	1.06, 0.92, 0.93, 1.52, 1.04	1.36, 0.87, 0.95, 1.52, 0.94	0.78, 1.06, 0.98, 1.0, 1.1	0.082134	0.108074	0.0482079	0.110164	0.130591	0.0552811
p8500	TPM=125.23 Putative ortholog: Os01g49190 ATP synthase, putative, expressed comp980_c0_seq1_g199	DAEGQDV[IL][IL]F[IL]DN[IL]FR, FTQANSEVSA[IL][IL]GR, Q[IL]SE[IL]G[IL]YPAVDP[IL]DSTSR, T[IL]AMDGTEG[IL]VR, VG[IL]TG[IL]TVAEHFR, [IL]PSAVGYQPT[IL]ATD[IL]GG[IL]QER, [IL]V[IL]EVAQH[IL]GENVVR	7	RPRAAPLHRPSSPAGYLFNRAASYATSAAATADAPADKLPPTSDKYVGGKITDEFTGAGSVGQVCQVIGAVVDVRFDEGLPPILTALEVLDNSIRLVLEVAQHLGENVVRTIAMDGTEGLVRGQRVLNTGSPITVPVGRATLGRIINVIGEPIDHKGDIKTNHYLPIHREAPAFVEQATEQQILVTGIKVVDLLAPYQRGGKIGLFGGAGVGKTVLIMELINNVAKAHGGFSVFAGVGERTREGNDLYREMIESGVIKLDDKQSESKCALVYGQMNEPPGARARVGLTGLTVAEHFRDAEGQDVLLFIDNIFRFTQANSEVSALLGRIPSAVGYQPTLATDLGGLQERITTTKKGSITSVQAIYVPADDLTDPAPATTFAHLDATTVLSRQISELGIYP…	0.987143	0.951429	1.00429	1.01857	0.965714	1.05714	0.99, 1.04, 0.93, 1.0, 0.99, 0.99, 0.97	0.98, 0.9, 1.02, 0.86, 1.01, 0.9, 0.99	1.16, 0.95, 1.07, 0.97, 0.98, 0.94, 0.96	1.17, 0.91, 1.14, 0.98, 0.98, 0.95, 1.0	0.98, 0.86, 1.1, 0.86, 1.02, 0.91, 1.03	1.19, 1.06, 1.04, 1.13, 0.97, 1.04, 0.97	0.0124813	0.0239472	0.0306172	0.036996	0.0347684	0.0303718
p64508	TPM=65.57 comp3615_c0_seq1_g969	DAFSHYGEVVDAK, [IL]FVGG[IL]SYSTDEGT[IL]R	2	MSSSKLFVGGLSYSTDEGTLRDAFSHYGEVVDAKIIIDRDTGRSRGFGFITYAADEHASSAIMALDGKDLHGRNIRVSPATERTSGFRDGGFGGGGGGY	0.945	0.98	0.935	0.985	1.03	0.96	0.97, 0.92	1.06, 0.9	0.96, 0.91	0.99, 0.98	1.09, 0.97	0.91, 1.01	0.025	0.08	0.025	0.005	0.06	0.05
p7184	TPM=129.65 Putative ortholog: Os07g44190 h/ACA ribonucleoprotein complex subunit 4, putative, expressed comp1188_c0_seq1_g491	DAPAADPAVDAPS[IL]AEAEAK, EGSDVVADPESAEAEK, NVV[IL]PTGGDAM[IL]AS[IL]AAAPEPEK, VVMP[IL]EV[IL][IL]TSYK	4	MSSTPPAVASPASELTKSKKKKTKSKDAPAADPAVDAPSLAEAEAKTDGFMIKPQSLVPSLDTSTWPLLLKNYDRLNVRTGHYTPLPSGHSPLKRPIAEYLRYGVINLDKPSNPSSHEVVAWIKRLLRVEKTGHSGTLDPKVTGNLIVCVDRATRLVKSQQGAGKEYVCIARFHAAVPDTARVARALESLTGAVFQRPPLISAVKRQLRVRTIYESKVLDHDPERHLAVFWISCEAGTYVRTLCVHLGLLLGVGAHMQELRRVRSGILGEQDNMVTMHDVMDSMWALDNHKDESYIRRVVMPLEVILTSYKRLVVKDSAVNAICYGAKLMIPGLLRFENDIDVGEEVVLMTTKGEAIAIGIAEMPTAVMATCDHGAVAKIKRVVMDRDTYPRKWGLGPV…	0.99	1.0325	0.9825	0.995	1.0575	0.9475	0.97, 0.9, 1.13, 0.96	0.96, 1.19, 1.01, 0.97	0.71, 1.08, 1.13, 1.01	0.73, 1.2, 1.0, 1.05	0.99, 1.33, 0.9, 1.01	0.73, 0.91, 1.11, 1.04	0.0491596	0.0535996	0.0941077	0.0980221	0.0939304	0.083504
p3745	TPM=47.51 TMHMM=1 SignalP=yes Putative ortholog: Os12g27830 dehydrogenase/reductase, putative, expressed comp3979_c0_seq1_g943	DAQ[IL]G[IL]FPVEYAK, FVQATVDHYGR, [IL]VVTASATGWNPVPR	3	MDLVNDMLNWVATPAMIASLLLSYPPYYLFKTCYSFLSYLFPEDLAGKVVLITGASSGIGENLAYQYATKGASLVLVARRELSLRQVADRALEIGAPDVIILSGDVANPDDCNRFVQATVDHYGRLDHLVCNAGIASVGTFQEIPDVTNYSSQLDVNFWGAVQSTSAALPHLKRTRGRIVVTASATGWNPVPRMIFYNAANAALINFFETLRTELGSEVGITIVTPGWIESEMSKGKFLKDHGGVEVDQEYRDAQIGLFPVEYAKNCARAMVQAARQGDRYLTVPAWFRTMYLWRVFAPEVVEFCYRLVYMHSPGANQTDVPSKTMAEGGAKQLLYPSSLRSSDVKNK	0.87	0.936667	0.98	1.15333	1.07667	1.07	1.0, 0.71, 0.9	1.13, 0.81, 0.87	1.01, 1.02, 0.91	1.01, 1.43, 1.02	1.12, 1.13, 0.98	0.9, 1.26, 1.05	0.085049	0.0982061	0.0351188	0.138363	0.0484195	0.104403
p57844	TPM=117.11 comp1135_c0_seq1_g1365	DATSDFED[IL]GHSESAR, VFGFEEVAK, YY[IL]GQ[IL]DAST[IL]PVK	3	PLGACATPPTPSPSPCRRLQRDAGRGRVLLRAMAGEKKVFGFEEVAKHSVAKDCWLVIDGKVYDVTPFMDEHPGGDEVLLAVTGKDATSDFEDIGHSESAREMMEKYYIGQIDASTIPVKRTFVPPQQAAQSQAKDSDLLIKILQFLVPIMILGLAFGIRHYTKSE	0.993333	1.03667	1.02333	1.03667	1.05333	1	0.98, 0.96, 1.04	0.91, 1.17, 1.03	1.08, 1.0, 0.99	1.11, 1.05, 0.95	0.93, 1.23, 1.0	1.19, 0.85, 0.96	0.024037	0.0751295	0.02848	0.0466667	0.0906152	0.100167
p11833	TPM=67.35 Putative ortholog: Os08g25290 expressed protein comp2948_c0_seq1_g199	DAVTEVAAMVGENVK, D[IL]VSAAA[IL]ENER, NEVFQY[IL]ASS[IL]AK, TAAEG[IL][IL]AMAQDEK	4	TRPERPKPPRRTNPLISSPSFLSCGGGGGRSRCGGDRTLHNPRMAWGQVARRPIATLLSRAQLSPSATSQTHLLSNHFPQNGMLHSRRFSSEVPASDQMGLIKQLRERTSAPIKDVKASLVSCNWDIEEAQKDLRKRGVILAAKKSSRTAAEGLLAMAQDEKRAAVVELNCETDFVARNEVFQYLASSLAKMVLSVQEPGKLVFPFAPAYLENMSINLDHPKLSGETTVRDAVTEVAAMVGENVKLRRGFMFSTAGHGAVSSYLHNSPQPGLGRMAGLVTLEAEDSSAPLDALKRVGSSIAMHIVAQKPLFLSKDLVSAAALENERDVLRTQAEKSGKPPMAMEKMVEGRLRKYFEEVVLLEQKYIVNDSTNIKTLLNDLSKEVGSKVTIGNFVRMEVG…	0.9975	1.0375	1.025	1.0275	1.04	0.99	0.96, 1.03, 0.94, 1.06	1.01, 0.98, 1.06, 1.1	0.97, 0.99, 1.09, 1.05	1.01, 0.96, 1.16, 0.98	1.05, 0.95, 1.13, 1.03	0.96, 1.01, 1.03, 0.96	0.0283945	0.0265754	0.0275379	0.0453459	0.0369685	0.0177951
p9987	TPM=71.6 Putative ortholog: Os02g48110 DnaK family protein, putative, expressed comp1401_c0_seq1_g302	DAVVAVPPYFGQAER, FAEYS[IL]SG[IL]TDASEK, V[IL]ETTAGPGS[IL][IL]SK, [IL]DD[IL]YAVE[IL][IL]GGATR, [IL]DEVVSEADK, [IL]VNYFADQFNK	6	MVLHYASGIADAHVGLPVRDAVVAVPPYFGQAERRALTQAAQLAGFNVLTLVNEHAGAALQYGIDKDFANESRHVIFYDMGSGSTYAALVYYSSYSAKEFGKTVSVNQFQVKDVRWNSKLGGLEMEMRLVNYFADQFNKQLGNGADIRQSPKAMAKLKKQVKRTKEILSANTAAPISVESLYNDIDFRSTITREKFEELCEDLWEQALTPIKDVLKHSGMKIDDIYAVELIGGATRVPKLQAKLQEFLGRSDLDKHLDADEAIVLGASLHAANLSDGIKLNRKLGMIDGSTYGFVFEIAGLDYVKDESIDQVLVPRMKKMPIKLFRSIRHTKDFDVSLSYDKASELPPGVSSHKFAEYSISGLTDASEKYGSRNLSAPIKANLHFSLSRSGIISLDRAE…	0.998333	1.03	1.005	1.005	1.03333	0.976667	1.06, 1.02, 0.97, 1.02, 1.0, 0.92	1.02, 1.03, 1.06, 1.05, 1.05, 0.97	1.09, 0.97, 1.0, 0.99, 0.97, 1.01	1.03, 0.95, 1.03, 0.96, 0.97, 1.09	0.97, 1.0, 1.1, 1.02, 1.05, 1.06	1.07, 0.94, 0.94, 0.94, 0.93, 1.04	0.0197343	0.0134164	0.0182117	0.0221736	0.018915	0.0251219
p12969	TPM=60.91 Putative ortholog: Os05g05320 PPR repeat domain containing protein, putative, expressed comp2593_c0_seq1_g17	DAYEDM[IL][IL]DGVQPVR, MGTD[IL][IL][IL]AASGEK, N[IL]VPA[IL]PAVEAYHR, [IL][IL]EFVQQSK	4	HCWRSCGVATATATSTEEYMRRNYANNVSEYNTVIGSLVQQRRPYLLRDAYEDMILDGVQPVRDTFHNLIVGTMKGSRLQDAFYFRDQMREMGLQPDVNLYNFLISTCGKCKNSDAAIVLLEEMKAHGVKLKGETYICLLNALAATGRTDQVYAIVNDMTAAGLGLNKYCYAGLITAFKNKTPASEDTMAKILEFVQQSKGWQYVERIANDSAENIMMNVSEEELYNLPTAEYAHRRGFIFKQLTIYHVAVHACADLQSKETLEALLEMITKEGFTCDAFTVMHAVRCYLRCGDIDSAVKMFEEFSSSKPTPAELYVTLAEGAMIGHTPRGMQVAQETLEKMTSRNFFLNPKMGTDLLLAASGEKTGGYTTANYVWDLLQTRNIVPALPAVEAYHRGLK…	0.9875	0.945	0.9475	0.9625	0.9625	1.01	1.08, 0.95, 1.0, 0.92	0.98, 1.02, 0.83, 0.95	0.99, 0.94, 1.02, 0.84	0.92, 0.99, 1.02, 0.92	0.9, 1.08, 0.83, 1.04	1.01, 0.92, 1.23, 0.88	0.0349702	0.0409268	0.0394493	0.02529	0.058648	0.0782091
p56782	TPM=239.79 comp244_c0_seq1_g1122	DD[IL]NFA[IL]K, QFFAD[IL]AEVVDVR, SAAPAVVAPAAVVPK, T[IL]FMGN[IL]PFGADFEQVK	4	DLRRLLSQTLSKTLAIRVPPFPAPTSSPPRRQRSMGKSSKKSAAPAVVAPAAVVPKGKAGKKREAEDEVEKAVAAKKQKAAPAKAAPVTKEDAKKAKKQPPPKKAESSSSEEDSSESEEEVKVQPKKTAKPVKQESSDESSDESSDEEPAKKPSAKPVASAASNGSKKGKQESSSSSSEDESDEDEKPAPVKKAPAKEESDESDSDDESEEAVPAKPKAPAAAAKKAVSSDSSESESESEDEDKSKKAAPAAKVTPAAKRKDDSSDSSDSDSEEEPPQKKQKDAVKVAPKSAKKDSSSDDDSSEESSDDEPKKQAAKAAESSGSEEDSSDDSDEDDKSAKTPKKEVPTATKSQKAEPKTPASNQGQASGGSKTLFMGNIPFGADFEQVKQFFADIAEVV…	1.01	1.0725	0.9975	0.985	1.0625	0.93	1.07, 0.98, 0.93, 1.06	1.17, 1.0, 1.03, 1.09	1.03, 0.95, 0.96, 1.05	0.96, 0.96, 1.03, 0.99	1.09, 1.02, 1.11, 1.03	0.88, 0.95, 0.93, 0.96	0.0334166	0.0375	0.0249583	0.0165831	0.0221265	0.0177951
p615	TPM=14.64 TMHMM=1 SignalP=yes BigPI=yes Putative ortholog: Os08g23180 fasciclin-like arabinogalactan protein 8 precursor, putative, expressed comp12228_c0_seq1_g1422	DDDP[IL]AVYA[IL]SK, T[IL]TV[IL]AVANGDMGD[IL]AASGR, VTFTAENAEDSSSPSTYVK	3	MEARRRVALLAALALTVALAATAAEGYNITKILGEHTEYSQFNKLLTETRLAADINKRRTITVLAVANGDMGDLAASGRTLQTKRHMLQMHVLVDYYGGKKLHQLAHGVTACSTMFQESGAAQGMSGYVNITQRRGGKVTFTAENAEDSSSPSTYVKTVKEIPYDLAVLQVDSVLASPEAEAPVAAPAPVNITELLSKKYCKSFAGLLAADAEAFSNINATKDNGLTLFCPVDSAVAAFMPKYKNLTAKGRTAILLFHAVPDYYSLQLLESNSGKVSTLATSNVAKKDYSFDVDKDGDTASLDTKVGKTASVTATVKDDDPLAVYAISKFLQPKELYKVAKDLAPAPAPAGPKKKTTKKKPSAASSPSDSDDDESADSPDASDDEAADKDNAAVPSVLA…	0.97	0.843333	0.966667	1	0.88	1.16	0.91, 1.01, 0.99	0.94, 0.73, 0.86	0.92, 1.01, 0.97	1.01, 1.01, 0.98	1.04, 0.73, 0.87	0.97, 1.38, 1.13	0.0305505	0.0611919	0.0260342	0.01	0.0896289	0.119304
p19831	TPM=20.9 Putative ortholog: Os07g49330 phospholipase C, putative, expressed comp6053_c0_seq1_g923	DDFAGQTV[IL]PVSE[IL]QPG[IL]R, F[IL]FSDD[IL]NPP[IL]R, T[IL]TTPVS[IL][IL]K	3	DFDGDAEAERLLDQIRQAQRVRVPRVGRPLLGIDDFHRFLFSDDLNPPLRRPQVHHDMAAPLSHYYVYTGHNSYLTGNQLSSDCSDVPIIKALQRGVRVIELDMWPNSAEDDINILHGRTLTTPVSLLKCLRSIKEYAFVASPYPVIITLEDHLPPELQDKVAKMVLEVFGNILYYPQEEHPKELPSPEDLKGRVLLSTKPPKEYLEAKAGGTIKDGDAEANPGKGGTDDDAAWGKEVPDFKTEIQFAKQEDDALDDDDEEEDEQQIQQHLAPQYKHLITIRAGKPKGGTTSDALKSDPNKVRRLSLSEQELAKAVVNHGTEIVRFTQRNLLRIYPKGTRITSSNYNPFIGWVHGAQMVAFNMQGYGRALWLMHGFYKANGACGYVKKPDFLMQTEPEV…	1.00667	0.963333	0.953333	0.95	0.953333	0.996667	0.97, 1.05, 1.0	0.92, 0.93, 1.04	1.0, 0.95, 0.91	1.03, 0.91, 0.91	0.94, 0.89, 1.03	1.09, 1.02, 0.88	0.0233333	0.0384419	0.0260342	0.04	0.0409607	0.0617342
p16765	TPM=29.46 Putative ortholog: Os02g43470 glutamate dehydrogenase protein, putative, expressed comp4940_c0_seq1_g603	DDGT[IL]ASFVGFR, F[IL][IL]EAANHPTDPEADE[IL][IL]TK, GG[IL]GCSPDE[IL]SR, GVMYATEA[IL][IL]AEYGK, MGAFT[IL]GVNR, NMAGVD[IL]PA[IL]MK, P[IL]D[IL]GGS[IL]GR	7	MNALAATSRNFRQAARLLGLDSKLEKSLLIPFREIKVECTIPKDDGTLASFVGFRVQHDNARGPMKGGIRYHPEVDPDEVNALAQLMTWKTAVAAVPYGGAKGGIGCSPDELSRSELERLTRVFTQKIHDLIGTHTDIPAPDMGTNAQTMAWIFDEYSKFHGHSPAVVTGKPIDLGGSLGRDAATGRGVMYATEALLAEYGKSISGSTFVIQGFGNVGSWAAQLIHEKGGKVIALGDVTGSIRNMAGVDIPALMKHRNEGGHMKDFHGAEVIDSAELLVHECDVLIPCALGGVLSRENAPDVKAKFIIEAANHPTDPEADEILTKKGVIVLPDIYANSGGVIVSYFEWVQNIQGFMWDEEKVNMELHKYMNSAFQHLKAMCKTHDCNLRMGAFTLGVNR…	0.99	1.02143	0.967143	0.982857	1.04143	0.947143	1.18, 0.88, 0.99, 0.96, 1.03, 0.96, 0.93	1.03, 0.99, 1.05, 1.03, 0.95, 1.01, 1.09	1.07, 0.95, 1.05, 0.88, 0.93, 0.98, 0.91	0.91, 1.08, 1.06, 0.93, 0.9, 1.02, 0.98	0.88, 1.12, 1.06, 1.07, 0.92, 1.06, 1.18	1.04, 0.96, 1.0, 0.86, 0.98, 0.96, 0.83	0.0362531	0.0168224	0.0267897	0.0274915	0.0401443	0.0285118
p8156	TPM=383.83 Putative ortholog: Os03g61670 calreticulin precursor, putative, expressed comp286_c0_seq1_g842	DDPY[IL]YSFDS[IL]K, FYA[IL]SAQYPEFSNK, H[IL]G[IL]E[IL]WQVK, K[IL]AEETWGK, QTGSVYDDWD[IL][IL]PAK, SGT[IL]FDN[IL][IL][IL]TDDAEYAK, [IL]DCGGGYVK	7	SIDLEVSGVRTESWIWAPRVLEASGRVVAVVSPSPVMAVLARSSYSSAAVALVALALVSAVAGEVFFQEKFDDGWEDRWVKSEWKKEDGTAGEWNHTSGNWSGDAQDKGIQTSEDYRFYAISAQYPEFSNKDKTLVLQFSVKHEQKLDCGGGYVKLLGGDVDQKKFGGETPYSIMFGPDICGYTTKKVHAILTKYGKNNLIKKEVPCETDQLTHVYTFVLRPDATYSILIDNVEKQTGSVYDDWDILPAKKIRDPEAKKPEDWEDNEYIPDPEDKKPEGYDDIPKEVTDPEATKPEDWDEEEDGEWTAPTIPNPEYKGPWTQKKIKNPNFKGKWKAPLIDNPEFKDDPYIYSFDSLKHIGIELWQVKSGTLFDNILITDDAEYAKKLAEETWGKHKDAE…	1.00714	1.12714	1.00429	0.997143	1.12143	0.892857	0.98, 0.98, 1.0, 1.07, 0.97, 1.01, 1.04	1.19, 1.08, 1.07, 1.13, 1.12, 1.11, 1.19	0.94, 1.0, 0.94, 0.95, 0.98, 1.13, 1.09	0.97, 1.02, 0.94, 0.88, 1.01, 1.11, 1.05	1.22, 1.1, 1.07, 1.06, 1.15, 1.1, 1.15	0.79, 0.93, 0.88, 0.84, 0.88, 1.01, 0.92	0.0137519	0.018089	0.0288557	0.0284282	0.0210926	0.0265217
p1232	TPM=159.09 TMHMM=1 Putative ortholog: Os01g62570 ATP/GTP/Ca++ binding protein, putative, expressed comp1504_c0_seq17_g475	DDQQNS[IL]EQTMAP[IL]MQSFR, DD[IL]DQSPVA[IL]QESTR, DGA[IL]SDVE[IL]NDFQVR, FAANTVE[IL]SDGTR, Q[IL]QVPEVFYYAQK, TA[IL][IL]QSF[IL]GR, VSQDMG[IL]ETP[IL]P[IL]SVK, [IL]RDDF[IL]PTS[IL]K	8	PELRRIQLKAPVIVVGCKLDLRDDQQNSLEQTMAPIMQSFREIETCIECSALRQIQVPEVFYYAQKAVLHPTAPLFDQEAQSLKPRCVRALKRIFILCDHDRDGALSDVELNDFQVRCFSAPLQPTEISGVKRVVQEKMPEGVNDSGLTLTGFLFLHALFIEKGRLETTWTVLRKFGYDNEIKLRDDFIPTSIKRAPDQTLEFTNEVVDYLKGIFHMFDIDNDGALLPSELEDLFSTAPENPWTSDLYKDCADRNVLGGLSLEGFLSKWALMALLDPANSFANLVYVGYSGDFNSAFTITRKRRVDRKKQQTQRNVFQCYVFGPKGAGKTALLQSFLGRQPSEAVPINSDRFAANTVELSDGTRKTLILREIPEGDVRSLLNNKESLAPCDAAVFVYDS…	1.0075	0.96625	0.99125	0.98375	0.9625	1.02625	1.01, 1.06, 1.1, 1.05, 1.0, 0.92, 0.92, 1.0	1.0, 1.06, 0.93, 0.98, 1.04, 0.84, 0.96, 0.92	1.14, 0.99, 1.03, 1.01, 0.96, 0.95, 0.88, 0.97	1.12, 0.93, 0.94, 0.96, 0.96, 1.04, 0.95, 0.97	0.99, 1.0, 0.85, 0.93, 1.04, 0.92, 1.05, 0.92	1.14, 0.93, 1.1, 1.03, 0.92, 1.13, 0.91, 1.05	0.0225792	0.0249955	0.0265544	0.0227516	0.0243303	0.03375
p6699	TPM=400.24 Putative ortholog: Os03g01910 transcription factor BTF3, putative, expressed comp479_c0_seq1_g793	DDVV[IL]QFQNPK, VGVNT[IL]PG[IL]EEVN[IL]FK, VQAS[IL]AANTWVVSGTPQTK	3	MAGAVRTGGKGSVRRKKKAVHKTTTTDDKRLQSTLKRVGVNTIPGIEEVNIFKDDVVIQFQNPKVQASIAANTWVVSGTPQTKKLQDLLPTIINQLGPDNLDNLRRLAEQFQKQMPGADAGASIGAAQDDDDDVPDLVPGTTFEEAAEEKKEPEAKKEPEAEEKKESS	1.00667	1.07667	0.96	0.956667	1.07333	0.893333	1.03, 0.9, 1.09	1.1, 1.05, 1.08	1.01, 0.96, 0.91	0.98, 1.06, 0.83	1.07, 1.16, 0.99	0.92, 0.92, 0.84	0.0560753	0.0145297	0.0288675	0.0674125	0.0491031	0.0266667
p8636	TPM=234.05 Putative ortholog: Os09g04670 DAG protein, chloroplast precursor, putative, expressed comp556_c0_seq1_g540	DE[IL][IL]DGF[IL]K, T[IL]AQVVGSEQEAR	2	PASPAPAAARGSVRCFATQPASSSLRDTSPNWSNRPPKETILLDGCDFEHWLVVMEPPPGDASNPEMMRDEIIDGFIKTLAQVVGSEQEARMKIYSVSTRHYFAFGALVSEELSYKLKELPKVRWVLPDSYLDVRNKDYGGEPFVNGEAVPYDPKYHEEWVRNNARANERSRRNDRPRNFDRSRNFERRRENMQSSQNREAPPGQQGFNGPPPGHNPGNMPPPPPPPGQNHGNNPPPYTQGGPSNYQPQMQNPPQAGYTPGGAPQMPNPQAGYAPGGAGHMQNPQTGYTPGGAPQMPNQQGGYMPSGAPNYQQGGPAGYQGGPQGGNQFNQGGNMPGGPGPAHPGGNPGYQGGNTPQRDGYGYPGGYNGSAPSGYNQQ	0.905	1.05	0.95	1.045	1.16	0.91	0.85, 0.96	1.04, 1.06	0.79, 1.11	0.93, 1.16	1.22, 1.1	0.76, 1.06	0.055	0.01	0.16	0.115	0.06	0.15
p16216	TPM=13.81 Putative ortholog: Os12g07810 aldehyde dehydrogenase, putative, expressed comp5657_c0_seq1_g956	DED[IL][IL]V[IL]PTDAV[IL]FEDPAFK, NGPGAPGGQSWTSQW[IL]K, VDVSAPEQCPPEGR, YAEDQDTFFEDYAEAHAK, [IL]PAAGPPSPAEH[IL]R	5	MAVHHLLRRGISGGSPLHPLRGLFLVSQELGRRPASSAAAGDATAELKSAREDVKQLLKDKSCHPILVRLGWHDSGTYDKNISEWPKCGGANGSLRFEIELKHAANAGLVNALKLIQTIKDKYAGVTYADLFQLASATAIEEAGGPKIPMIYGRVDVSAPEQCPPEGRLPAAGPPSPAEHLREVFYRMGLNDKEIVALSGAHTLGRSRPERSGWGKPETKYTKNGPGAPGGQSWTSQWLKFDNSYFKDVKERRDEDLLVLPTDAVLFEDPAFKIYAEKYAEDQDTFFEDYAEAHAKLSNLGSKFDPPKGVSLD	1.08	1.086	1.02	0.956	1.02	0.94	1.07, 0.95, 1.41, 0.99, 0.98	1.11, 1.04, 1.22, 1.1, 0.96	1.06, 0.92, 1.11, 1.06, 0.95	0.99, 0.96, 0.79, 1.07, 0.97	1.04, 1.1, 0.86, 1.12, 0.98	0.96, 0.88, 0.91, 0.96, 0.99	0.0848528	0.0428486	0.0361939	0.0457821	0.0469042	0.0197484
p1613	TPM=2004.14 TMHMM=1 SignalP=yes Putative ortholog: Os03g46100 cupin domain containing protein, expressed comp16_c0_seq1_g486	DEGF[IL]AGPEQQQGQGEEEWR, DTYN[IL][IL]QQRPT[IL]ANR, FQYF[IL]GES[IL]VSS[IL]SK, GSNN[IL]QVVCFE[IL]NAQK, SDQGSVEA[IL]RPFNEESR, VSPGSAFVVPPGHPVVE[IL]SSSR, [IL][IL]VAN[IL][IL]HT[IL]SVPGK	7	MASRASIPLLFLLAAGLLFAAAVGTSREEEGRRGEQWEHQHGKQGRGREGEQEQEQEQDSRRPYVFGSRSFQRIFRSDQGSVEALRPFNEESRLLRGIKNYRVTIIKAKPRSFIVPGYPDADGISYVVQGEGVLTVIENGEKRSYTVRQGDVVVAPAGTIRHLANTDGRRKLIVANILHTISVPGKFQYFLGESLVSSLSKRVQRAAFKTSEERLERLFGRQGQKQGFIVRASEEQVRELRRQASEGGQSHHWPLPPFGGDSRDTYNLLQQRPTIANRHGRLYEADARSFRALADQDVRVAFANITAGSMTAPYYNTQSVKIALVLEGEGEVEIVCPHLSQESQRQQQGRSERGKGRGREEEDDEREQQHQQQGRGSGSESESEEQQQQQQKYETIRAR…	0.978571	1.02429	0.985714	1.01143	1.04143	0.98	1.01, 0.99, 1.03, 1.0, 1.0, 0.87, 0.95	1.07, 0.97, 1.04, 1.27, 0.97, 0.82, 1.03	1.06, 1.07, 0.78, 0.99, 1.02, 0.98, 1.0	1.05, 1.08, 0.76, 0.99, 1.02, 1.13, 1.05	1.05, 0.99, 1.0, 1.26, 0.97, 0.94, 1.08	1.0, 1.1, 0.76, 0.78, 1.05, 1.2, 0.97	0.0202871	0.051263	0.0366357	0.0451151	0.0405573	0.061062
p285	TPM=707.34 TMHMM=3 Putative ortholog: Os02g48720 mitochondrial carrier protein, putative, expressed comp109_c1_seq1_g1145	DEGFGS[IL]WR, NFA[IL]DF[IL]MGGVSAAVSK, QFNG[IL]VDVYR, SSFDAFQQ[IL][IL]AK, YFPTQA[IL]NFAFK, [IL][IL][IL]QNQDEM[IL]K	6	LPLIFRLPRSASPVLSRCNTGRSGAAEHHPRRLSLRFRRDSTMADRANQPSVVQKFGGQFHLGSSFSGVVRARNMCPSVSAYDRRFSTSSYMTQSIYAPTMSFNGSNMVSTSPIFANSPPEKKGVKNFAIDFLMGGVSAAVSKTAAAPIERVKLLIQNQDEMLKSGRLSEPYKGIGECFGRTIKDEGFGSLWRGNTANVIRYFPTQALNFAFKDYFKSLFNFKKDRDGYWKWFAGNLASGGAAGASSLFFVYSLDYARTRLANDAKASKGGGERQFNGLVDVYRKTLKSDGIAGLYRGFNISCVGIIVYRGLYFGLYDSLKPVLLTGTLQDNFFASFALGWLITNGAGLASYPIDTVRRRMMMTSGEAVKYKSSFDAFQQILAKEGAKSLFKGAGANIL…	1.05333	0.96	0.925	0.876667	0.908333	0.966667	1.02, 1.17, 1.03, 1.02, 1.04, 1.04	0.97, 1.15, 0.89, 0.91, 0.93, 0.91	0.94, 1.03, 0.85, 0.97, 0.78, 0.98	0.92, 0.88, 0.82, 0.95, 0.75, 0.94	0.95, 0.98, 0.87, 0.89, 0.89, 0.87	0.97, 0.9, 0.95, 1.06, 0.84, 1.08	0.0236173	0.0395811	0.0378374	0.0319026	0.0186934	0.0375648
p4997	TPM=209.91 SignalP=yes Putative ortholog: Os01g69080 acyl-desaturase, chloroplast precursor, putative, expressed comp625_c0_seq2_g505	DETGASPTAWAVWTR, DYAD[IL][IL]EF[IL]VGR	2	NCTSERAPVDQCLDLGEVLLAAGASAAFLFGDALASATFLFSEAFTGAAAAGAGAAAAAAAASGSSPSRPPLRLRLRSCLLLQEKCMSRDNLLLHLKPVEKCWQPQDFLPDPASDGFHDEVKELRERAKEIPDDYLVCLVGDMITEEALPTYQTMLNTLDGVRDETGASPTAWAVWTRAWTAEENRHGDLLNKYLYLTGRVDMRQIEKTIQYLIGSGMDPRTENNPYLGFIYTSFQERATFISHGNTARHAKDFGDLKLAQICGIIASDEKRHETAYTKIVEKLFEIDPDGTVLALADMMRKKIAMPAHLMFDGQDEKLFDHFSMVAQRLGVYTARDYADILEFLVGRWKVPELTGLSGEGHKAQDYLCTLAGRIRKLDERAQSRAKQAGKMPFSWVYG…	0.905	1.01	0.93	1.03	1.14	0.92	1.03, 0.78	1.0, 1.02	1.03, 0.83	1.0, 1.06	0.97, 1.31	1.03, 0.81	0.125	0.01	0.1	0.03	0.17	0.11
p54639	TPM=39.85 TMHMM=1 SignalP=yes comp9147_c0_seq2_g975	DETSQ[IL]EDVVR, TAQ[IL]AA[IL]ASG[IL]EA[IL]QVR	2	KAKSAIIADDHRSLKNCGDRRGNAIAGAMGGGHGSLIAATILLFSCSVRVVQCDPASAVSQEHEIQRLRSKVAALEDEVSWTKDETSQLEDVVREKTAQIAALASGLEALQVRNVADDEPVVQASTNSALLEKQIERLGNDLEDQVRKGELLDARAREAERRLLELAQKLERVEKINIEQRKRIEELERDLQQHSEEKLPELERKAKLTAEELAMVRGMWLPYWFASRSVHCQELASAKWHHHGKPVLDALTHKVAETLAHGQRLMEPHLQATKDKLLPVAKAHFNWLKNSAAYRACRDAMQPCMVKTWELAYHCWQA	1.085	0.93	0.975	0.925	0.875	1.055	0.91, 1.26	0.92, 0.94	0.96, 0.99	1.06, 0.79	1.0, 0.75	1.05, 1.06	0.175	0.01	0.015	0.135	0.125	0.005
p8841	TPM=591.23 Putative ortholog: Os06g05880 profilin domain containing protein, expressed comp110_c1_seq1_g935	DFAEPGT[IL]APTG[IL]F[IL]GGTK, YMV[IL]MGEPGAV[IL]R, [IL]GDY[IL][IL]DQDF	3	VFPQTHTDTRNRYIPHPTQPQPSRQPASQVQAKQSIKQRPRAIQAQQQPSEVAAGEGGGRSRMSWQAYVDDHLMCEIDGQHLTSAAIIGHDGSVWAQSPDFPQFKPEEIAAIMKDFAEPGTLAPTGLFLGGTKYMVIMGEPGAVIRGKKGSAGICVKKTSQTMILGIYDEPMTPGQCNMVVERLGDYLIDQDF	0.97	0.916667	1.00667	1.04	0.933333	1.13	1.08, 0.99, 0.84	1.06, 1.01, 0.68	1.01, 1.11, 0.9	0.94, 1.11, 1.07	0.98, 1.01, 0.81	0.96, 1.1, 1.33	0.07	0.11921	0.0606447	0.051316	0.0622718	0.107858
p8364	TPM=355.44 Putative ortholog: Os04g35600 OsPDIL1-2 protein disulfide isomerase PDIL1-2, expressed comp265_c0_seq1_g1367	DFDVSA[IL]ESF[IL]DASSTPK, EAAATEP[IL]KDE[IL], EDQTP[IL][IL][IL][IL]QDTESK, EQ[IL]EADQ[IL]VSW[IL]K, SAYYGAADEFK, SEP[IL]PEVNNEPVK, VVVADNVNDVVFK, [IL]FKPFDE[IL]VVDSK	8	MAISKVWISLLLALAFVLSARAEEAAADVEAAVVEEAVLTLGADNFDDAIAKHPFILVEFYAPWCGHCKSLAPEYEKAAQLLSKHDPPIVLAKVDANDEKNKPLASKYEIQGFPTLKIFRNQGKNIQEYKGPREAEGIVDYLKKQVGPPSKEIKAPEDAATLEDGKIHIVGVFAEFSGPEYTNFIEVADKLRSEYEFAHTLHANHLPRGDSAVERPLVRLFKPFDELVVDSKDFDVSALESFIDASSTPKVVTFDKNPDNHPYLLKYFQGTAVKVMLFLNFSTGPFESFKSAYYGAADEFKDKEVKFLIGDVEASQGAFQYFGLKEDQTPLILIQDTESKKFLKEQIEADQIVSWLKEYFDGKLSPFRKSEPIPEVNNEPVKVVVADNVNDVVFKSGKN…	1.00625	1.23125	1.01125	1.0225	1.25375	0.83875	0.98, 0.81, 1.12, 1.03, 1.07, 1.09, 0.88, 1.07	1.26, 1.66, 0.93, 1.3, 1.07, 1.17, 1.14, 1.32	0.96, 1.19, 1.03, 1.05, 1.02, 0.95, 0.9, 0.99	0.98, 1.47, 0.92, 1.02, 0.96, 0.87, 1.03, 0.93	1.29, 2.04, 0.83, 1.26, 1.0, 1.07, 1.3, 1.24	0.77, 0.72, 1.1, 0.81, 0.96, 0.81, 0.79, 0.75	0.0386808	0.0763085	0.0307895	0.0665945	0.126744	0.045057
p9111	TPM=108.49 Putative ortholog: Os07g29620 OsSCP39 - Putative Serine Carboxypeptidase homologue, expressed comp1018_c0_seq1_g1530	DFGDSAEKPFTVDGK, NNDG[IL]H[IL]N[IL]K, N[IL]E[IL]G[IL]PE[IL][IL]EDN[IL]K, SYGP[IL]SF[IL]K	4	MGPTGQSRLLLLLLLAAAAAAAPVDETFLRLPSSSARTLTPKTPRSVGADLIRALNLHPTDASPRRPGDAVPAGTLVERPIRLASLVPGSDADADGGNTSVSNLGHHAGYYRLANTHDARLFYFFFESRRHNKEDPVVIWLTGGPGCSSELALFYENGPFQIADDLSLVWNEFGWDQESNLIYVDQPTGTGFSYSSDSRDTRHNEASVSNDLYDFLQAFFKEHPQYVENDFYITGESYAGHYIPAFATRVHQGNKNNDGIHINLKGFAIGNGLTDPAIQYKAYTDYALNMSLITESEFNKINKIVPACELAVKLCGTTGTVSCLAAYVVCNTIFSSIRLIIGNKNYYDIRKPCVGSLCYDFSNLEKFLNQESVRESLGVGDIEFVSCSPTVYQAMLLDW…	0.9625	1.0775	1.0425	1.0875	1.1125	0.9775	1.01, 1.02, 0.92, 0.9	1.15, 1.16, 1.05, 0.95	0.93, 1.08, 1.15, 1.01	0.91, 1.05, 1.26, 1.13	1.13, 1.13, 1.14, 1.05	0.81, 0.93, 1.1, 1.07	0.0306526	0.0492231	0.0471478	0.0733002	0.0209662	0.0670044
p90627	TPM=13.0 comp13912_c0_seq1_g4	DFTFSESSVSVFR, GEGE[IL]SVQSSGQQSFQSK	2	PESEVLPPSNLVARESPPNVATKKMVSKGFYFPASGVPASGGGDNVVQKKGEGELSVQSSGQQSFQSKNWNEKEEDDGRTTEENKSTEETVSQGFYFPESHVPASGDKGNVVRQKGEGEFSAQNLAPYSLPLNTKDEKEKDITMDEKKPTEDMPPRDFTFSESSVSVFRGEDDVVQSKEGFEVTVQGVVEEADSNTDLDMGKVDNVQVEIIAIAAPESEV	1.105	1.025	1.08	1	0.955	1.055	1.29, 0.92	1.04, 1.01	1.14, 1.02	0.88, 1.12	0.81, 1.1	1.1, 1.01	0.185	0.015	0.06	0.12	0.145	0.045
p18499	TPM=26.3 Putative ortholog: Os02g46990 AAA-type ATPase family protein, putative, expressed comp6642_c0_seq1_g698	DFV[IL]A[IL]ATNRPGD[IL]DSAVADR, G[IL]FSFFR, WVQA[IL]NATFEH[IL]GGG[IL]R	3	PAPEPPAEEKPRVRNDNPRTSASGFNPEPLEEGVRLLDEMNKKHSSTEVKKTFEHLKKVEDTKQAELAAKKAEYMREAAILELERTRTEYEEKKKLAQTQAEIKSQVARYNDELARKRLQNEHEAQRTRNHELVKMQEESALKIEHIRRQFEEEIQELRKRTQQEMAAIEQETQRQKSRAEAEAKALEKKLSEDVNRRMLIEKANAEREKWVQAINATFEHIGGGLRTILTDQSKLTVAVIGVTGLAAGIYTTREGARVVWGYVDRILGQPSLIRESSRGKYPWSGVPSRAMSTVTSKLKNGSNLGKDGKGFGDVILNPSLQKRVNQLANATANTKLHQAPFRNMLFYGPPGTGKTMAARELARESGLDYALMTGGDVAPLGAQAVTKIHQLFDWAKKS…	0.936667	0.946667	0.983333	1.05333	1.01	1.04667	0.92, 0.96, 0.93	1.0, 1.01, 0.83	1.09, 0.98, 0.88	1.19, 1.02, 0.95	1.09, 1.05, 0.89	1.09, 0.98, 1.07	0.0120185	0.0584047	0.0606447	0.0712585	0.061101	0.0338296
p12477	TPM=61.16 Putative ortholog: Os08g02690 MA3 domain containing protein, expressed comp2435_c0_seq1_g182	DG[IL]DD[IL]A[IL]D[IL]PDAR, [IL]TES[IL]DD[IL]S[IL]D[IL]PSAK	2	PVRHARRSHSGKAVKLKKDGAGGKGTWGRLIDADTATFLDQNDPNYDSDEEPYELIEVPATTPLEDYKKSLVTIIEEYFSTGDAKQTASDLKEVGYNDFHRYFVKKLVSMAMDRHDKEKEMVSVLLSCLYGDVVSSTQIKLGFVMLLQAVDDLSVDIPDAVDVLALFIARSVVDDILPPAFLNKAKGSLTESSKGMQVLQIAAKSYLSAPHHAELLERRWGGSVYVTVDEVKRRITDLVKEYIRNGDTAEACRCIRELAVPFFHHEVVKRAVTLGMESPAAEALIIKLLKEASEEGLISSSQMVKGFSRITESLDDLSLDIPSAKSQFQTLVSKAVSEGWLDSSYVSSGANGNVQDDDHEKLRRYKRDAVSMIHEYFLSDDTPELIRTLKELGVPEYNP…	1.015	0.97	1.11	1.09	0.95	1.155	1.04, 0.99	0.9, 1.04	1.12, 1.1	1.07, 1.11	0.86, 1.04	1.24, 1.07	0.025	0.07	0.01	0.02	0.09	0.085
p58598	TPM=97.26 comp501_c1_seq1_g970	DG[IL]DS[IL]S[IL]QKPDFR, GVE[IL]A[IL]ATPGR, [IL]EQGDGP[IL]V[IL][IL][IL]APTR	3	MSPTWAWSSVSASFLGTPPGRAVYAARVAPQNKANHTRLYAAYRVMTAAGRPRVSHSPTRPGPARARGELREGLALGPAVGSLRYVGHGNLARPVPSPHAPSSKANPPPPHASTRRLAPDRSALQIYPREAAASNPIHPDSISGQPPPAAAAMNPYADNRYADPSSYRDRRSDLAAAPVIAPQVPVGAANPYAAPYTPIAAASVGGNFPRYGQGGYGGGMGYGGGRGGGGGFHGGGGRGGGNGRDGLDSISLQKPDFRGLIPFEKSFYVECPEVQSMSETDVAQYRQLRDITVEGREVPKPIRFFHEANFPDYCMQAIAKSGFVEPTPIQAQGWPMALKGRDVIGIAETGSGKTLSYILPGLVHVGAQPRLEQGDGPIVLILAPTRELAVQIQAEATKF…	0.93	0.916667	0.926667	0.99	0.983333	1.00667	0.96, 0.93, 0.9	1.04, 0.9, 0.81	1.0, 0.97, 0.81	1.04, 1.04, 0.89	1.08, 0.97, 0.9	0.96, 1.07, 0.99	0.0173205	0.0669162	0.0589727	0.05	0.0523874	0.0328295
p12421	TPM=21.83 Putative ortholog: Os12g36760 expressed protein comp3385_c0_seq1_g17	DGRPTSS[IL]FP[IL]V[IL]APSSR, NPV[IL]VEN[IL]PAEF[IL]QTTDSR, TMSGPATSETS[IL]PVDR	3	MANYLAQFQTIKSSCDRIVIAVEDVSDLWLNVKESFQQRLPVKKACLNNKARNPVLVENLPAEFIQTTDSRLRSRFPQEQYLFWFREPYATVVLVTCEDLDEFKTILKPRLKLIVQNDEREWFIVFVSKAHPSNEQANKMAKKVYARLEADFNTKKRERCCKFDLHGPDADFWDDFDSKMVDCIRNTLDRRVQFYEEENRRLSEQRFTPIWNFCNFFILKESMAFMFEVTNLHEDSLREYDELELCYSESVNLPGKPREFGGLDTGDDQAALLNPGFKALTQIVQDDVFREFEFRQYIFACQSKLLFKLSRPVEVAARGYAFVVNFSKTLAWHENALPFCFREVWVITACLGLINSTSSQYDGGAVAIDSEKEFYRLQGDLYSLCRVKFMRLAYLIGYG…	1.00667	0.953333	0.93	0.923333	0.95	0.98	0.94, 1.12, 0.96	1.02, 1.03, 0.81	0.97, 0.97, 0.85	1.03, 0.86, 0.88	1.08, 0.92, 0.85	0.95, 0.94, 1.05	0.05696	0.0717248	0.04	0.0536449	0.0680686	0.0351188
p7771	TPM=203.72 Putative ortholog: Os03g21040 stress responsive protein, putative, expressed comp392_c0_seq1_g49	DGTA[IL]A[IL]WK, [IL]VPYNPNYQDESV[IL]WTESR, [IL][IL]PWGEEAYAAGGGANAPR	3	DGTTVVLWEWAKGDNQSWKILPWGEEAYAAGGGANAPRGGGSSEPTVRIFCKADEGFSATVRNGEVVLAPTNPRDDHQHWFKDMRHSNKIKDEEGYPAFALVNKVTGQAIKHSQGEGHPVKLVPYNPNYQDESVLWTESRDVGAGFRCIRMVNNIYLNFDALNGDKDHGGVHDGTTVVLWEWAKGDNQSWKILPWGEEAYAAGGGANAPRGGGSSEPTVRIFCKADEGFSATVRNGEVVLAPTNPRDDHQHWFKDMRHSNKIKDEEGYPAFALVNKVTGQAIKHSQGEGHPVKLVPYNPNYQDESVLWTESRDVGAGFRCIRMVNNIYLNFDALNGDKDHGGVRDGTALALWKWCEGDNQRWKILPCGGDVFVSVVFKFRSCRRVLLPPWIVGEEMCTV…	1.00333	1.04667	1.00333	1	1.04333	0.96	0.96, 0.98, 1.07	1.06, 1.04, 1.04	0.93, 1.07, 1.01	0.97, 1.09, 0.94	1.1, 1.06, 0.97	0.88, 1.02, 0.98	0.0338296	0.00666667	0.0405518	0.0458258	0.0384419	0.0416333
p12962	TPM=49.25 Putative ortholog: Os10g31950 3-ketoacyl-CoA thiolase, peroxisomal precursor, putative, expressed comp2671_c0_seq1_g8	DGTTTAGNASQ[IL]SDGAGAV[IL][IL]MR, DTPAVD[IL][IL]VP[IL]FK, E[IL]VVSADDG[IL]R, TN[IL]DPSE[IL]GDVVVGTV[IL]APGSQR	4	ALLCSALTVTSTQLHPTSGRRRPLSILRGKRLPSSHTSSSPSLQNTPRPSSPSQEPTVKPTTPSLRDTLGGAMEKAIDRQRILLGHLEPAAGPNPAASAISASACAAGDSAAYHRGACFADDVVIVAAYRTAICKASRGGFKDTPAVDLLVPLFKALVDKTNLDPSEIGDVVVGTVLAPGSQRAIECRMATLYAGFPDTVPLKTVNRQCSSGLQAVADVASAIKAGMYNIGIAAGLESMTVNQISSNDVKMNPKVELFAQARDCLLPMGLTSENVAQRYGITRMEQDQAAVESHMKAAAAVAAGKFKEEIVPVHTKIVDPKTGEQKEIVVSADDGIRSNTTLAVLSKLKPAFSKDGTTTAGNASQLSDGAGAVLLMRRDVAAQKGLPILGIYRGFTAVG…	0.955	0.905	0.8925	0.9425	0.955	0.9925	0.97, 0.87, 1.05, 0.93	0.79, 0.99, 0.97, 0.87	0.84, 0.86, 0.88, 0.99	0.87, 0.99, 0.84, 1.07	0.82, 1.14, 0.92, 0.94	1.07, 0.86, 0.91, 1.13	0.0377492	0.0464579	0.0335099	0.0534439	0.0670199	0.06408
p54288	TPM=117.44 TMHMM=2 comp872_c0_seq2_g20	DGV[IL]VEG[IL]FWK, H[IL][IL]DET[IL]SEVVK	2	LAYTDRPAPSSRRPLHRIDPHPPTSSPSTTAQMASDGAAATPAKVTPKKANLLDPHSIKHLLDETISEVVKSKGYAEDNRLGNWKLLIGTAVIGIALLAQFYPKKFPQNREFLLGCIALYVVMNVVLLILSYTKEKDAIIFTHPPAGSFNSTGLVISSKLPRFSDMYNLSIASADPQSISAHKTVQFTKSVTKWFTKDGVLVEGLFWKDVERLIDDCNNGRKTK	0.975	1.09	0.955	0.975	1.115	0.875	0.99, 0.96	1.12, 1.06	1.04, 0.87	1.05, 0.9	1.13, 1.1	0.93, 0.82	0.015	0.03	0.085	0.075	0.015	0.055
p10766	TPM=71.75 Putative ortholog: Os05g05220 glioma tumor suppressor candidate region gene 2 protein, putative, expressed comp2575_c0_seq1_g747	DGVAAEGDGDQDADA[IL]AGER, TDD[IL]DEFYEK	2	MEPTWQCTSSPALQVRPARPRPQTLTLPLPTPPPKTPEAAARASEQPAAMGKAAKGSRKGKKAWRANIRTDDIDEFYEKQTRDAHAGAAAIPSLPSDSLFFVDKPASASTSSAADPAPQDVPVKRKIEKSREKVLYHESVLKRNPYVQPVPSSLVSKKDKKKFKKHAKKKELQEPKEEKSVPMEEDSTEPNLDIWGGDGKGDALPKKGMKRLMKNRSTTSVIPAVEVEPPGCSFNPKFEDHQDSLAQAVADEMRKIYTKELGPKPVPLTVLGEAVAEEDKFFLDAADDGDGDAAEGDRDGVAAEGDGDQDADALAGERKTKTKRVTRVELNKRARRKERLRTEADAKKLEVLSKQIDSLPNIIAEIAKEDEEKEKMHTRRTLAKEERLKSAPRRLGRHK…	1.155	1.07	0.99	0.875	0.93	0.93	1.28, 1.03	1.13, 1.01	0.97, 1.01	0.76, 0.99	0.88, 0.98	0.86, 1.0	0.125	0.06	0.02	0.115	0.05	0.07
p10297	TPM=339.63 Putative ortholog: Os01g49290 WD repeat-containing protein, putative, expressed comp478_c0_seq1_g1372	DGVT[IL][IL]WD[IL]GEGK, FSPNNFAPT[IL]VSGSWDR	2	MAGSQESLVYAGVMRGHNDQVTAIATPIDNSPFIVSSSRDKSLLVWDLTNPIQATQDSSSEYGVPFRRLTGHGHFVQDVVLSSDGQFALSGSWDGELRLWDLSTGATTRRFVGHDKDVLSVAFSIDNRQIVSASRDKTIKLWNTLGECKYTIGGDLGGGEGHNGWVSCVRFSPNNFAPTIVSGSWDRSVKVWNLTNCKLRNTLDGHGGYVSAVAVSPDGSLCASGGKDGVTLLWDLGEGKKLYSLDAGSIINSLCFSPNRYWLCAATHDSIKIWDLESKHIVQDLRPEITVSTKQLLYCTCLSWSADGSTLYAGYTDGTIRIYKISGFSYSS	1.035	0.97	0.955	0.925	0.95	0.995	0.99, 1.08	1.08, 0.86	0.98, 0.93	0.99, 0.86	1.1, 0.8	0.91, 1.08	0.045	0.11	0.025	0.065	0.15	0.085
p9128	TPM=783.59 Putative ortholog: Os03g38000 40S ribosomal protein S3-1, putative, expressed comp94_c0_seq1_g1569	DGYM[IL]SSGQPVNEY[IL]DAAVR, E[IL]AEDGYSGVEVR, FVSDGVFYAE[IL]NEM[IL]TR, G[IL]CA[IL]AQAES[IL]R	4	QNPSCRAPQLAAAAASSSSTTATMATQISKKKKFVSDGVFYAELNEMLTRELAEDGYSGVEVRVTPMRTEIIIRATRTQNVLGEKGRRIRELTSVVQKRFNFPENGVELYAEKVVNRGLCAIAQAESLRYKLLGGLAVRRACYGVLRFVMESGAKGCEVIVSGKLRAQRAKSMKFKDGYMISSGQPVNEYIDAAVRHVLLRQGVLGIKVKIMLDWDPKGKLGPTTPLPDLVTIHPPKEEDELRPPTLVEV	0.9925	1.0725	0.9775	1	1.1025	0.9275	1.06, 0.91, 0.83, 1.17	0.95, 0.96, 1.22, 1.16	1.01, 1.01, 0.88, 1.01	0.95, 1.11, 1.07, 0.87	0.9, 1.05, 1.46, 1.0	1.06, 1.05, 0.73, 0.87	0.0759797	0.0689656	0.0325	0.0550757	0.123178	0.078991
p56646	TPM=98.33 comp1052_c0_seq1_g848	DKVPAEVASEVESAVAE[IL]R, DVDEV[IL][IL]VGGMTR, SKYES[IL]VNS[IL][IL]ER, SQVFSTAADNQTQVG[IL]R, VPAEVASEVESAVAE[IL]R, [IL][IL]GEFD[IL]VG[IL]PPAPR	6	AYFNDAQRQATKDAGRIAGLDVERIINEPTAAALSYGTNNKEGLIAVFDLGGGTFDVSILEISNGVFEVKATNGDTFLGGEDFDNTLLEYLVSEFKRTEAIDLSKDRLALQRLREAAEKAKIELSSTTQTDINLPFITADASGAKHLNITLTRSKYESLVNSLIERTREPCKSCLKDAGITVKDVDEVLLVGGMTRVPKVQEVVSEIFGKAPSKGVNPDEAVAMGAAIQGGILRGDVKELLLLDVTPLSLGIETLGGIFTRLIGRNTTIPTKKSQVFSTAADNQTQVGIRVLQGEREMASDNKLLGEFDLVGIPPAPRGVPQVEVTFDIDANGIVTVSAKDKATAKEQQITIRSSGGLSEAEIQKMVHEAEQHAQKDQERKTLIDLRNTADTTIYSIEK…	1.06667	1.10833	1.065	1.00667	1.045	0.963333	0.89, 0.99, 1.01, 1.17, 1.22, 1.12	1.07, 1.05, 1.13, 1.2, 1.16, 1.04	1.03, 0.95, 0.97, 1.18, 1.16, 1.1	1.16, 0.96, 0.97, 1.01, 0.95, 0.99	1.2, 1.05, 1.12, 1.02, 0.95, 0.93	0.96, 0.91, 0.86, 0.99, 1.0, 1.06	0.0507718	0.02651	0.0395601	0.0319026	0.0418529	0.028829
p8432	TPM=178.23 Putative ortholog: Os08g09200 aconitate hydratase protein, putative, expressed comp259_c0_seq1_g1664	DMTMSPPGPHAVK, FDFHGQTAE[IL]K, FVEFHGEGMGK, FYS[IL]PA[IL]NDPR, SEGHDT[IL][IL][IL]AGAEYGSGSSR, STNA[IL]QSNME[IL]EFSR, V[IL][IL]QDFTGVPAVVD[IL]AAMR, [IL]AE[IL]PFKPAR, [IL]SVFDAATK, [IL][IL]DWENTSPK	10	ALARPCAAFARRAGGLSSSTGSAVRCQIGAVAPAVERVQRRMAASATEHAFKSILTSLPKPGGGEYGKFYSLPALNDPRIDKLPYSIRILLESAIRNCDDFQVTKNDVEKIIDWENTSPKLAEIPFKPARVLLQDFTGVPAVVDLAAMRDALAKLGSDANKINPLVPVDLVIDHSVQVDVARSTNALQSNMELEFSRNKERFGFLKWGSTAFQNMLVVPPGSGIVHQVNLEYLGRVVFNTNGIMYPDSVVGTDSHTTMIDGLGVAGWGVGGIEAEATMLGQPMSMVLPGVVGFKLTGKLRNGVTATDLVLTVTQMLRKHGVVGKFVEFHGEGMGKLSLADRATIANMSPEYGATMGFFPVDHVTLDYLKLTGRSDETVSMIEAYLRANNMFVDYNEPQI…	0.947	1.025	1.003	1.059	1.092	0.991	1.01, 1.03, 0.94, 1.01, 0.85, 1.04, 0.85, 0.98, 0.87, 0.89	1.04, 0.93, 1.08, 0.9, 0.86, 0.97, 1.18, 1.13, 1.12, 1.04	0.99, 1.09, 1.04, 1.18, 0.97, 0.99, 0.82, 1.03, 0.94, 0.98	0.98, 1.06, 1.1, 1.16, 1.13, 0.95, 0.97, 1.06, 1.08, 1.1	1.03, 0.91, 1.14, 0.89, 1.01, 0.93, 1.39, 1.16, 1.29, 1.17	0.95, 1.17, 0.96, 1.3, 1.12, 1.02, 0.7, 0.91, 0.84, 0.94	0.0241776	0.0337392	0.0298905	0.022383	0.0528898	0.05419
p58324	TPM=144.52 comp998_c0_seq1_g457	DN[IL]T[IL]WTSDMQDDAGDEMR, QAFDEA[IL]AE[IL]DS[IL]GEDSYK	2	MKGDYHRYLAEFKSAAERKEAADSTLGAYQAAQDIAMKELPPTHPIRLGLALNFSVFYYEILNSPDRACSLAKQAFDEAIAELDSLGEDSYKDSTLIMQLLRDNLTLWTSDMQDDAGDEMRDASKPEDEN	1.02	1.1	0.995	0.985	1.075	0.915	0.98, 1.06	1.03, 1.17	1.02, 0.97	1.05, 0.92	1.05, 1.1	1.0, 0.83	0.04	0.07	0.025	0.065	0.025	0.085
p6715	TPM=502.44 Putative ortholog: Os03g50290 14-3-3 protein, putative, expressed comp254_c0_seq1_g837	DN[IL]T[IL]WTSDNADEGGDE[IL]K, EAAENT[IL]VAYK, QAFDEA[IL]AE[IL]DS[IL]GEESYK, SAQD[IL]A[IL]AD[IL]PTTHP[IL]R	4	MSTAEATREENVYMAKLAEQAERYEEMVEFMEKVAKTADVGELTVEERNLLSVAYKNVIGARRASWRIISSIEQKEESRGNEAYVASIKEYRTRIETELSKICDGILKLLDSHLVPSATAAESKVFYLKMKGDYHRYLAEFKAGAERKEAAENTLVAYKSAQDIALADLPTTHPIRLGLALNFSVFYYEILNSPDRACNLAKQAFDEAIAELDSLGEESYKDSTLIMQLLRDNLTLWTSDNADEGGDEIKEASKPEGEGH	0.9775	1.0325	0.9625	0.9875	1.0575	0.9325	0.95, 0.93, 0.99, 1.04	0.97, 1.05, 1.07, 1.04	0.89, 0.93, 0.97, 1.06	0.95, 1.0, 0.98, 1.02	1.03, 1.12, 1.08, 1.0	0.92, 0.89, 0.9, 1.02	0.0242813	0.0217466	0.0363719	0.0149304	0.0265754	0.0298259
p157	TPM=770.02 TMHMM=1 Putative ortholog: Os04g43170 caleosin related protein, putative, expressed comp104_c0_seq2_g347	DNDG[IL][IL]HPWETYNGCR, FMPVNFEN[IL]FSK, MVA[IL]QAPVTSER, MVA[IL]QAPVTSERPVR, MYDGS[IL]FEYMER	5	MATKARNDVRGTTRTEGKGDAGVGVDVRGATARAEGNAGGANRTEGMGDVAGGKDSLKMVALQAPVTSERPVRGDLEEHVPKPYLARALAAPDIYHPEGTTDDHHHHNMSVLQQHVAFFDRDNDGIIHPWETYNGCRAVGFNFIMSALITVLVHLVMSYPTLPGWMPSPLFPIYVHNIHKCKHGSDSATYDKEGRFMPVNFENIFSKFARTYPDRLSYREMWRMTEGSREVFDFFGWIAMKLEWTFLYVLARDEEGYLSREAIRRMYDGSLFEYMERQHHAQQEHVKTY	1.04	1.048	1.002	0.974	1.008	0.976	1.43, 0.96, 1.01, 0.96, 0.84	1.42, 1.13, 0.96, 0.89, 0.84	1.26, 0.85, 1.04, 0.96, 0.9	0.88, 0.89, 1.03, 1.0, 1.07	0.99, 1.17, 0.95, 0.93, 1.0	0.89, 0.76, 1.08, 1.08, 1.07	0.10144	0.105138	0.071861	0.0380263	0.0424735	0.0650077
p87182	TPM=16.07 comp11126_c0_seq2_g1028	DNGMHA[IL][IL][IL]YDD[IL]SK, EAFPGDVFY[IL]HSR, EVAAFAQFGSD[IL]DAATQA[IL][IL]NR, G[IL]RPA[IL]NVG[IL]SVSR, PA[IL]NVG[IL]SVSR	5	MNSRGTNESDTLYCVYVAIGQKRSTVAQLVQILSEANALEYSILVAATASDPAPLQFLAPYSGCAMGEYFRDNGMHALIIYDDLSKQAVAYRQMSLLLRRPPGREAFPGDVFYLHSRLLERAAKRSDQTGAGSLTALPVIETQAGDVSAYIPTNVISITDGQICLETELFYRGIRPAINVGLSVSRVGSAAQLKAMKQVCGSLKLELAQYREVAAFAQFGSDLDAATQALLNRGARLTEVLKQPQYEPLPIEKQIVVIYAAVNGFCDRMPRDACHEMRSIINHLKQNRDFPRLRIGIGRPPGKMDPANFVLRPFTKKEQEELDFTFHRGLEAVRIMTLEGFNKSATFVNTAQSLKC	1.022	1.084	1.164	1.124	1.06	1.054	1.02, 1.04, 1.12, 1.03, 0.9	1.12, 1.0, 1.31, 1.01, 0.98	0.95, 1.0, 1.97, 0.98, 0.92	0.93, 0.97, 1.75, 0.95, 1.02	1.1, 0.96, 1.17, 0.98, 1.09	0.85, 1.01, 1.5, 0.97, 0.94	0.0352704	0.0615305	0.201955	0.157213	0.03937	0.114569
p8338	TPM=258.89 Putative ortholog: Os03g05730 cell division control protein 48 homolog E, putative, expressed comp317_c0_seq1_g1327	DNPEAMEEDETDE[IL]AE[IL]R, DVD[IL]DA[IL]AK, E[IL]VE[IL]P[IL]R, G[IL][IL][IL]FGPPGSGK, NAPS[IL][IL]F[IL]DE[IL]DS[IL]APK, [IL]AEDVE[IL]EH[IL]SR, [IL]DEVGYDDVGGVR, [IL]DQ[IL][IL]Y[IL]P[IL]PDVESR	8	HGGTISPPLPATTTRSRRNLAPPPAAGDPATMATPTPQGEASSSDPKGAKKDYSTAILERKKSPNRLVVDEATNDDNSVVALHPDTMERLQLFRGDTVLLKGKKRKDTICIVLADDTCEEPKVRMNKTVRKNLRVRLGDVVSVHQCPDVKYGKRVHILPIDDTVEGITGNLFDAFLKPYFLEAYRPLRKGDLFLVRGGMRSVEFKVIETDPAEYCIVAPDTEIFCDGEPIKREDEERLDEVGYDDVGGVRKQMAQIRELVELPLRHPQLFKSIGVKPPKGILLFGPPGSGKTLIARAVANETGAFFFLINGPEIMSKLAGESESNLRKAFEEAEKNAPSIIFIDEIDSIAPKREKTNGEVERRIVSQLLTLMDGLKSRAHVIVMGATNRPNSIDPALRR…	1.01875	1.02875	1.045	1.02625	1.0125	1.0175	1.08, 0.97, 1.03, 0.97, 1.12, 0.98, 1.01, 0.99	1.14, 1.11, 1.04, 1.0, 1.06, 0.92, 0.95, 1.01	1.13, 0.92, 1.03, 0.98, 1.18, 0.95, 1.1, 1.07	1.05, 0.96, 1.01, 1.01, 1.05, 0.96, 1.09, 1.08	1.06, 1.15, 1.02, 1.03, 0.94, 0.94, 0.94, 1.02	0.99, 0.83, 0.99, 0.98, 1.11, 1.03, 1.15, 1.06	0.019497	0.026487	0.032238	0.0176208	0.0258257	0.0343693
p6840	TPM=169.76 Putative ortholog: Os02g14110 aminotransferase, classes I and II, domain containing protein, expressed comp629_c0_seq1_g1174	DP[IL][IL]GVTEAF[IL]ADPSPDK, [IL]AAVQA[IL]SGTGACR, [IL]AGN[IL]NMEY[IL]PMGGSMK, [IL]AYGEDSEF[IL]EDK, [IL]AYGEDSEF[IL]EDKR	5	MASLFGHVEPAPKDPILGVTEAFLADPSPDKVNVGVGAYRDDNGKPVVLDCVRQAESRIAGNLNMEYLPMGGSMKMIEESLKLAYGEDSEFIEDKRIAAVQALSGTGACRLFADFQKRFLPDSQIYIPTPTWSNHHNIWRDAQVPQRTYSYYHPESRGLDFAGLMDDIKNAPNGSFFLLHACAHNPTGVDPTEEQWREISYQFKLKNHFPFFDMAYQGFASGDPERDAKAIRIFLEDGHQIGCAQSYAKNMGLYGQRAGCLSVLCEDELQAVAVKSQLQQIARPMYSNPPVHGALVVSIILNDPELKSLWLREVKGMADRIIGMRKALRENLENLGSPLSWEHVTNQIGMFCYSGMTPEQVDRLTNEYHIYMTRNGRISMAGVTTGNVAYLANAIHDVTK	0.994	1.082	0.984	0.99	1.094	0.908	1.0, 1.14, 0.92, 0.97, 0.94	1.1, 1.06, 1.08, 1.07, 1.1	1.04, 1.09, 0.89, 0.96, 0.94	1.04, 0.96, 0.97, 0.98, 1.0	1.1, 0.93, 1.18, 1.09, 1.17	0.95, 1.02, 0.82, 0.9, 0.85	0.0389358	0.008	0.0358608	0.0141421	0.0447884	0.0356931
p6838	TPM=169.76 Putative ortholog: Os06g35540 aminotransferase, classes I and II, domain containing protein, expressed comp629_c0_seq2_g1168	DP[IL][IL]GVTEAF[IL]ADTSPEK, [IL]AGSTNMEY[IL]PMGGSAK, [IL]AYGEDSEF[IL]K	3	MASLFGHVEPAPKDPILGVTEAFLADTSPEKVNVGVGAYRDDNGKPVVLECVREAERRIAGSTNMEYLPMGGSAKMIDESLKLAYGEDSEFIKDKRVAAVQTLSGTGACRLFADFQKRFLPDSQIYIPTPTWANHHNIWRDAQVPQRTFGYYYPDTKGLDFAGLMNDIKNAPDGSFFLLHACAHNPTGVDPSEEQWREISHQFKLKNHFPFFDMAYQGFASGDPERDAKAIRIFLEDGHQIGCAQSYAKNMGLYGQRAGCLSILCDDEMQAVAVKSQLQQIARPMYSNPPLHGALIVSTILGDPALKTLWLKEVKGMADRIIGMRKALRENLENLGSPLSWEHVTNQIGMFCYSGMTPEQVDRLTNEYHIYMTRNGRISMAGVTTGNVAYLANAIHDVTK	0.916667	1.05	1.04333	1.13667	1.14333	0.99	0.89, 0.92, 0.94	0.97, 1.07, 1.11	0.9, 1.01, 1.22	1.02, 1.1, 1.29	1.09, 1.16, 1.18	0.94, 0.94, 1.09	0.0145297	0.0416333	0.0938675	0.0800694	0.0272845	0.05
p11165	TPM=47.54 Putative ortholog: Os07g31380 NAD-dependent malic enzyme, mitochondrial precursor, putative, expressed comp3316_c0_seq1_g300	DP[IL]Y[IL]G[IL]QEHR, EAVAEN[IL]AEGYR, EEEV[IL]QG[IL][IL]YPPTSR, GPD[IL][IL]HDPWFNR, G[IL][IL]PPSVVSSQQQ[IL]DR, NMWNPVYPTVVYK, VVFSSGSPFDNVD[IL]GDGK, V[IL]PVM[IL]DVGTNNEK, [IL]D[IL]YVAAAG[IL]NPQR	9	GVRKSRSALRTRGRRQIGLVSAVSARIGQADPRVVVSPKSENNSNASRTAHTKEKLRNTTTRPLPTSRQEGGISSSSRWDQPAMASISRSLRRSLAPDTCHRLLLQARGFVTAECHRPVVLHKRGPDILHDPWFNRGTAFSMTERDRLGLRGLLPPSVVSSQQQIDRFMGDLKRLEQNARDGPSDTYQLAKWRILNRLHDRNETMYYKVLIDNIEEYAPIVYTPTVGAVCQNYSGLFRRPRGMYFSAEDRGEMMSMVYNWPADQVDMIVVTDGSRILGLGDLGVQGMGISIGKLDLYVAAAGINPQRVLPVMIDVGTNNEKLLKDPLYLGLQEHRLEGEEYVEIIDEFMEAVFSRWPNVIVQFEDFQSKWAFRLLQRYRNTYRMFNDDVQGTAGVAIAG…	1.02	0.956667	1.01333	0.994444	0.942222	1.06222	0.99, 1.03, 1.04, 0.93, 1.05, 1.02, 1.03, 0.94, 1.15	0.95, 0.89, 0.99, 0.96, 0.79, 1.01, 1.11, 0.95, 0.96	0.96, 1.07, 1.0, 0.95, 0.94, 1.0, 1.14, 0.99, 1.07	0.97, 1.03, 0.96, 1.02, 0.89, 0.99, 1.11, 1.05, 0.93	0.96, 0.86, 0.96, 1.03, 0.75, 1.0, 1.08, 1.01, 0.83	1.0, 1.2, 1.0, 0.99, 1.19, 0.99, 1.03, 1.04, 1.12	0.0216667	0.0288194	0.0222361	0.0221178	0.0356596	0.0284692
p14777	TPM=111.56 Putative ortholog: Os01g51700 ras-related protein, putative, expressed comp4722_c0_seq3_g331	DQD[IL]YFQTVADPVAETEQR, EDFNVDEAF[IL]SVAK	2	DSGVGKTSLMNQYVHNKFSQQYKATIGADFVTKEVLIEDRLVTLQIWDTAGQERFQSLGVAFYRGADCCVLVYDVNVNKSFDTLNTWHDEFLNQASPSDPKTFPFILLGNKIDVDGGKSRVVSEKKAREWCSSKGNIPYFETSAKEDFNVDEAFLSVAKLALEHERDQDIYFQTVADPVAETEQRGGCAC	1.07	1.265	1.065	1.005	1.18	0.845	1.22, 0.92	1.45, 1.08	1.17, 0.96	0.96, 1.05	1.19, 1.17	0.8, 0.89	0.15	0.185	0.105	0.045	0.01	0.045
p6165	TPM=149.61 TMHMM=2 SignalP=yes Putative ortholog: Os09g32220 pob, putative, expressed comp950_c0_seq1_g758	DS[IL]D[IL][IL]QHDWA[IL]PK, G[IL]FS[IL][IL][IL]GEENATDDATK	2	MAEELVLDTAIRDWVLIPLSVVMVLIGVLRYFVSKLMRSPPSASPSPDPKAVKEGQLVIRARNLRTSSQFIPAKAFKARKLYYTDGERGLLHVPKEDAQKAQAAMFSDPNMAMDMMKKNLSMIVPQTLTFAWVNFFFSGFVAAKIPFPLTQRFRGMLQNGIDLSTVDVSYVSSRSWYFLNLFGLRGLFSLILGEENATDDATKMMQMGGGMGFNPAMSLGAEKDSLDIIQHDWALPKMEHHAEEVLRKLLKK	0.965	1.075	0.975	1.01	1.11	0.91	0.92, 1.01	0.98, 1.17	0.95, 1.0	1.03, 0.99	1.06, 1.16	0.97, 0.85	0.045	0.095	0.025	0.02	0.05	0.06
p5735	TPM=113.39 TMHMM=10 SignalP=yes Putative ortholog: Os08g19160 transmembrane 9 superfamily member, putative, expressed comp828_c0_seq1_g1245	DSAEN[IL]GE[IL][IL]MGDR, SDP[IL]SPGAFT[IL]MK, VMGTADATDA[IL]PASTSK, YNPGES[IL]NVK	4	ICSHLHRHPTPASPPRRSPTATSPPATFPAPDPPTADPDPATMARLRALLLALAATAALLLASADAFYLPGSYPHKYNPGESLNVKVNSLTSIDTEIPFSYYSLPFCTPPDGVKDSAENLGELLMGDRIETSPYRFRMHANDTDVLLCRSDPLSPGAFTLMKKRIDEMYQVNLILDNLPAIRYTRKDDYFLRWTGYPVGIRVGADYYVFNHLQFTVLVHKYEDPNVARVMGTADATDAIPASTSKDPSSPASSGWMVVGFEVVPCSIKHNPDDAKSLKMYAKYPTKIACDPTTVSMSIKEGEPIVYTYEVAFVESDIKWPSRWDAYLKMEGAKVHWFSILNSLMVIAFLAGIVFVILLRTVRRDLTRYEELDSEAQAQMNEELSGWKLVVSDVFRAPTN…	1.09	1.17	1.1275	1.0325	1.07	0.9625	1.13, 1.06, 1.07, 1.1	1.16, 1.11, 1.21, 1.2	1.02, 1.08, 0.99, 1.42	0.9, 1.01, 0.93, 1.29	1.02, 1.04, 1.13, 1.09	0.88, 0.97, 0.82, 1.18	0.0158114	0.0227303	0.0992786	0.0889171	0.0248328	0.0787798
p8954	TPM=243.29 Putative ortholog: Os07g31370 ras-related protein, putative, expressed comp661_c0_seq1_g1166	DSSVAV[IL]VFDVASR, D[IL]GVMF[IL]ETSAK, GSDV[IL][IL]V[IL]VGNK, QEDMVDVN[IL]K, [IL]AAA[IL]PGMET[IL]SSAK	5	RERERESKEGQGERFGETPTHTAPPSERARSRLPPSPSTPPRRTRSRSDLISPPDTMAPVSALAKYKLVFLGDQSVGKTSIITRFMYDKFDNTYQATIGIDFLSKTMYLEDRTVRLQLWDTAGQERFRSLIPSYIRDSSVAVIVFDVASRQSFLNTSKWIEEVRTERGSDVIIVLVGNKTDLVDKRQVSIEEGEAKAKDLGVMFIETSAKAGFNIKALFRKIAAALPGMETLSSAKQEDMVDVNLKSGNANSSQSQAQAGGCSC	0.944	1.076	1.002	1.074	1.164	0.944	1.1, 0.83, 1.03, 0.94, 0.82	1.07, 1.24, 1.0, 0.9, 1.17	1.03, 1.05, 0.99, 1.03, 0.91	0.94, 1.26, 0.96, 1.1, 1.11	0.97, 1.5, 0.97, 0.96, 1.42	0.97, 0.84, 0.99, 1.14, 0.78	0.054827	0.0602163	0.02498	0.0581034	0.121515	0.0628172
p11878	TPM=28.35 Putative ortholog: Os02g01280 T-complex protein, putative, expressed comp3147_c0_seq1_g318	DSTT[IL]VGDGTTQEEVTK, D[IL][IL]T[IL][IL]EDA[IL]K, [IL]VAAGANPVQ[IL]AR	3	MASPFGATSTCGLNAAAPTGFAARKQLSLVSPPSISFPQKIRPRRKCNVKVNAAKELYFNKDGSAIRKLQNGVNKLADLVGVTLGPKGRNVVLESKYGSPRIVNDGVTVAKEVELEDPVENIGAKLVRQAAAKTNDLAGDGTTTSVILAQGMIAEGVKIVAAGANPVQIARGIEKTAKALVGELRKMSKEVEDSELADVAAVSAGNNYEIGNMIAEAMNKVGRQGVVTLEEGKSAENNLYVVEGMQFDRGYISPYFVTDSEKMSVEYENCKLLLVDKKINNARDLITILEDAIKSGYPILIIAEDIEQEALATLVVNRLRGALKIAAIKAPGFGERKSQYLDDIATLTGGTVIREEIGLSLDKADAEVLGTAAKVVITKDSTTIVGDGTTQEEVTKRVT…	1.05667	1.1	1.02	0.97	1.04333	0.933333	0.93, 1.2, 1.04	1.09, 1.24, 0.97	0.95, 1.1, 1.01	1.02, 0.92, 0.97	1.17, 1.03, 0.93	0.87, 0.89, 1.04	0.0783865	0.0781025	0.043589	0.0288675	0.069602	0.0536449
p60321	TPM=65.41 comp1871_c0_seq1_g659	DSV[IL]AFSENVPGTSSK, EQ[IL]QSYVFDV[IL]R, M[IL][IL]DDVFEQK	3	MKNHVSISKGFQGQPAADDLDRSFSDSIPTAIEHCSHWAEEGEGNPRTRTNWAINYSRDLEAEETNEAEQTNGGTNQSNQSREQAAASRDKPWPGCHCLPWCIGQQIAGYLSLRVQQLDVKCETKTKDNVFVNVVASVQYRALADKASDAFYKLSNTREQIQSYVFDVIRASVPKMILDDVFEQKNEIAKAVENELEKAMSAYGYEIVQTLIVDIEPDVNVKRAMNEINAAARMRLAATEKAEAEKILQIKRAEGDAESKYLAGLGIARQRQAIVDGLRDSVLAFSENVPGTSSKDVMDMVLVTQYFDTMKDIGASSKSSAVFIPHGPGAVRDIAAQIRDGQLQGSMV	0.923333	0.973333	0.93	1.00667	1.05333	0.956667	0.95, 0.9, 0.92	0.94, 0.99, 0.99	0.85, 1.0, 0.94	0.9, 1.11, 1.01	0.99, 1.1, 1.07	0.91, 1.01, 0.95	0.0145297	0.0166667	0.043589	0.0606447	0.0328295	0.0290593
p58044	TPM=80.75 comp1584_c0_seq1_g1671	DSV[IL]GFAENVPGTSAK, SQ[IL]QAYVFDV[IL]R, Y[IL]SG[IL]G[IL]AR	3	AAGQSRKQIGGGKDPSFLSYPVRAAAQRLILDNVSPRARVFRVGVVGVGLERNRRRRRSVAHSTSPLSFAASPSTGGTIRSDLKPAVMGNLLCCVQVDQSTVAIREQFGKFDSVLEPGCHCLPWMVGKRVAGHLTLRLQQLDVRCETKTKDNVFVTVVASIQYRPLAGKESDAFYKLTNTRSQIQAYVFDVIRASVPKLLLDDAFEQKNDIAKAVEDELEKAMSAYGFEIVQTLIVDIEPDEHVKRAMNEINAAARMRLAANEKAEAEKIVQIKRAEGEAEAKYLSGLGIARQRQAIVDGLRDSVIGFAENVPGTSAKDVMDMVLITQYFDTMKEIGASSKSSAVFIPHGPGAVRDIATQIRDGLLQGQSATQQ	0.956667	0.99	0.943333	0.99	1.03333	0.96	1.11, 0.87, 0.89	1.21, 0.95, 0.81	1.06, 0.91, 0.86	0.96, 1.05, 0.96	1.1, 1.09, 0.91	0.87, 0.96, 1.05	0.0768838	0.117189	0.0600925	0.03	0.0617342	0.0519615
p57344	TPM=128.17 comp1835_c0_seq1_g444	DTATQA[IL]GSASDQAAAK, EVT[IL]AAGGTAAEYAK	2	MASQQQNRKDTASKQDEGHDLDLKEIGKYRAEAQQNSADAIRAAQERYNEANRKLQAGGGAAHGAKGGTVTVTQAPGVTAVVSCQESKNHPSKQETSPAAAHGQGATMASSRGTEKQHATKQKEGRGHETSGHDEAGRRRGEERKSSAEATHGHAQAGSHGMGKERGSTGMKDTATQALGSASDQAAAKGEQAKDAAARGAGLTAEKTKEATGSAAEYAKQTAAKTKEVTLAAGGTAAEYAKQAAVKAKDVTASTGGTAAEYAKTAAEKAREAALAAGKTTVSHNLDPKRRTWLG	0.97	1.065	1.075	1.125	1.1	1.01	0.92, 1.02	1.07, 1.06	1.23, 0.92	1.34, 0.91	1.16, 1.04	1.15, 0.87	0.05	0.005	0.155	0.215	0.06	0.14
p4022	TPM=96.66 SignalP=yes Putative ortholog: Os07g48760 CAMK_KIN1/SNF1/Nim1_like.32 - CAMK includes calcium/calmodulin depedent protein kinases, expressed comp437_c0_seq1_g422	DTDSEEE[IL]KEAFR, EADVDGDGQ[IL]NYEEFVK, EAFS[IL]FDK	3	TLPASQPAPLAIFLLASAAALTGVRACARAVSILRPHPAPATMADQLTDDQIAEFKEAFSLFDKDGDGCITTKELGTVMRSLGQNPTEAELQDMINEVDADGNGTIDFPEFLNLMARKMKDTDSEEELKEAFRVFDKDQNGFISAAELRHVMTNLGEKLTDEEVDEMIREADVDGDGQINYEEFVKLSILLAVAAAKTDNAIPAMFLLSSVFPDLLCFM	1.01333	1.13	1.09667	1.08333	1.11667	0.966667	0.99, 1.12, 0.93	1.1, 1.16, 1.13	1.03, 1.2, 1.06	1.04, 1.07, 1.14	1.11, 1.03, 1.21	0.94, 1.03, 0.93	0.0560753	0.0173205	0.0523874	0.0296273	0.0520683	0.031798
p9823	TPM=429.59 Putative ortholog: Os02g13530 40S ribosomal protein S24, putative, expressed comp210_c0_seq1_g1558	DTNC[IL]FVFK, KQFV[IL]EV[IL]HPGR, QFV[IL]EV[IL]HPGR, SSGFG[IL][IL]YDN[IL]ESAK	4	MSDTKTQPAVTLRTRKFMTNRLLSRKQFVLEVIHPGRANVSKAELKERLAKVYDVKDTNCIFVFKFRTHFGGGKSSGFGLIYDNLESAKKFEPKYRLIRNGLATKVEKSRKQIKERKNRTKKIRGVKKTKAGEAAKKK	1.0125	1.135	1	1.01	1.145	0.8825	1.15, 1.03, 1.09, 0.78	1.21, 1.12, 1.08, 1.13	1.0, 1.07, 0.98, 0.95	0.87, 1.04, 0.91, 1.22	1.05, 1.09, 0.99, 1.45	0.83, 0.95, 0.91, 0.84	0.0812788	0.0272336	0.0254951	0.0788458	0.103722	0.0286865
p8749	TPM=234.2 Putative ortholog: Os06g49480 peptidyl-prolyl cis-trans isomerase, putative, expressed comp534_c0_seq1_g771	DTNGSQFF[IL]TTVTTSW[IL]DGK, HTGPGY[IL]SMANAGK, VVMG[IL]FGNAVPK, V[IL]SGMDV[IL]YK	4	DPIARAPVHSTTSKQICSSLSLPGPRRSDRTSSEMAMRAWMARPRSRPASVCLWLALIAATFAFAQAKKPNADLSKVTHKVFFDIEIDGKPAGRVVMGLFGNAVPKTAENFRALCTGEKGIGKSGKPLHYKGSSFHRIIPSFMIQGGDFTHGNGMGGESIYGTKFADENFKLKHTGPGYLSMANAGKDTNGSQFFITTVTTSWLDGKHVVFGKVISGMDVIYKVEAEGKQSGTPKSKVVVADSGELPL	1.02	1.095	0.9125	0.8975	1.0775	0.84	1.07, 1.01, 0.96, 1.04	0.97, 1.12, 1.15, 1.14	0.94, 0.89, 0.92, 0.9	0.88, 0.88, 0.96, 0.87	0.91, 1.11, 1.19, 1.1	0.97, 0.79, 0.81, 0.79	0.0234521	0.0421307	0.0110868	0.0209662	0.0593542	0.043589
p1648	TPM=73.87 TMHMM=1 Putative ortholog: Os01g71050 MSP domain containing protein, putative, expressed comp1740_c0_seq1_g1644	DTSA[IL]T[IL]EQ[IL]PA[IL]K, ESP[IL]EET[IL]PEEAVT[IL]SDR, VVPAPQEQ[IL]SAVVTDVSSPVK, [IL]QQEMVF[IL]R	4	MGQGVVEIHPRELQFTFELKKQSSCSVHLVNKSDEYVAFKVKTTSPKRYCVRPNTGVILPRSTCDFTVTMQAQRTAPPDMQLKDKFLVQTTVVPPGTSDEDLIPAFFSKETNAYIDESKLRVVLVDASHPPVEQLINSVPNNDAAVEVPVSRHTLNVENELPVMEKVVPAPQEQISAVVTDVSSPVKQSPILREVPVIVHEEHAILAESPPPLKNESPPPLKDEYPSPVKDTSAITIEQLPALKENSVTSKESPLEETLPEEAVTLSDRGLFSGQNHQLSHVTEDVQNLKSKLNNLESKLEGAEKMIIKLREESRSMTQERDKLQQEMVFLRKTGTPKSQLGFPLLFVVYVALLGTSLGYLLRL	0.9575	0.9675	0.9875	1.03	1.01	1.0225	0.95, 1.01, 1.01, 0.86	1.01, 0.93, 1.04, 0.89	0.95, 1.04, 1.02, 0.94	0.99, 1.03, 1.01, 1.09	1.05, 0.93, 1.03, 1.03	0.94, 1.11, 0.98, 1.06	0.0354436	0.0347311	0.0249583	0.0216025	0.0270801	0.0383786
p12434	TPM=69.44 Putative ortholog: Os04g01590 arginase, putative, expressed comp2662_c0_seq1_g42	DTVDGMTAMVAAK, EA[IL]WCGSTNSSTEEGK, [IL]MNV[IL]SESVK	3	PRSITYAIAQRPLRSLARSLAFLAVSLPPLDSPASSAMGGAAAARWIQRLSAARISTEALQRGQSRVIDASLTLIRERAKLKGELLRAMGGVKASASLLGVPLGHNSSFLQGPAFAPPRIREAIWCGSTNSSTEEGKELNDPRVLTDVGDVPIQEIRDCGVEDDRLMNVISESVKTVMEEDPLRPLVLGGDHSISYPVVRAVSEKLGGPVDILHLDAHPDIYDCFEGNTYSHASSFARIMEGGYARRLLQVGLRSITKEGREQGKRFGVEQYEMRTFSKDREKLENLKLGEGVKGVYVSVDVDCLDPAFAPGVSHIEPGGLSFRDVLNILQNLQGDVVAADVVEFNPQRDTVDGMTAMVAAKLVRELSAKISKRKEQQKSPESRTTMGSTGGDRAILPT…	1.22667	1.29	1.07	0.873333	1.05	0.833333	1.27, 1.3, 1.11	1.31, 1.31, 1.25	1.08, 1.15, 0.98	0.85, 0.88, 0.89	1.03, 1.0, 1.12	0.83, 0.88, 0.79	0.0589727	0.02	0.0493288	0.0120185	0.0360555	0.0260342
p3628	TPM=44.33 TMHMM=1 Putative ortholog: Os02g06480 SCO1 protein homolog, mitochondrial precursor, putative, expressed comp3781_c0_seq1_g79	DTVEQVHDYVK, EFHED[IL][IL]G[IL]TGTSEE[IL]R, NYDEDT[IL]AQG[IL][IL]K, [IL]E[IL]VPVF[IL]SVDPER	4	RRRRRRRVGRENKTATTMTRRHALQLLARALHTCPRPPLRRPQVAALRGWRSVGSPAGFFSTDAAAGASAAAGAAHGGSKFQAAASASSAAAQGGSKSAEVAAAVAHGSGAGGQDGKSEQDKGRSVRGGPVSWLSFLLLLVTGGGIIVYYDKEKKRQIEELKNKTNSVKPAQTVGTAAIGGPFSLLNHDGKPVTEKDFLGKWTLLYFGFTHCPDICPDELQKMSAALNKIKEKEKLEIVPVFISVDPERDTVEQVHDYVKEFHEDLIGLTGTSEEIRKVARAYRVYYMKTEEEGSDYLVDHSIVMYLMNPKMEFVKFFGKNYDEDTLAQGIIKEIREHKSS	0.9525	1.015	0.965	1.015	1.065	0.955	0.94, 0.98, 1.0, 0.89	1.01, 1.02, 1.12, 0.91	0.9, 0.89, 1.06, 1.01	0.96, 0.9, 1.06, 1.14	1.08, 1.03, 1.12, 1.03	0.89, 0.87, 0.95, 1.11	0.0242813	0.0429146	0.0417333	0.0531507	0.0217945	0.0543906
p333	TPM=111.44 TMHMM=3 Putative ortholog: Os03g08360 3-ketoacyl-CoA synthase 10, putative, expressed comp1117_c0_seq1_g624	DV[IL]EH[IL]QSN[IL]G[IL]R, D[IL]VEVGGHA[IL]K, EEQA[IL][IL]STE[IL]VNR, FDEES[IL]AFQAR, GVEASGPDAGSPTFSVR, [IL]PDF[IL]QSVN[IL]K	6	MAREEQALLSTEIVNRGVEASGPDAGSPTFSVRVRRRLPDFLQSVNLKYVKLGYHYLLSHGVYLATIPVIVLVCGAEVGSLSRDELWRKVWDEATYDLATVLAFLAVLAFTISVYIMSRPRPIYLIDFATYKPADELKVSKAEFIDLARKSGKFDEESLAFQARLLAKSGIGDESYMPRCVFQPDANCATMKEGRAEASAAMFAALDELFEKCHVRPKDVGVLVVNCSLFNPTPSLSAMIVNHYKMRGNILSYNLGGMGCSAGVISIDLARDMLQASGAGLAVVVSTEAVSFTWYAGKRRSMLIPNAFFRAGCAAVLLSNRRRDFRRAKYQLEHVVRTHKGADDRSFRSVYQEEDEQRIKGLSISRDLVEVGGHALKTNITTLGPLVLPFSEQLLFFAG…	1.04167	1.01667	0.986667	0.948333	0.98	0.971667	1.04, 0.97, 1.05, 1.0, 1.18, 1.01	1.03, 1.02, 1.02, 0.96, 1.02, 1.05	1.0, 0.9, 1.07, 0.96, 1.07, 0.92	0.96, 0.93, 1.02, 0.95, 0.91, 0.92	0.99, 1.06, 0.97, 0.96, 0.86, 1.04	0.97, 0.88, 1.05, 1.0, 1.05, 0.88	0.0300463	0.0122927	0.0298515	0.0162104	0.0288675	0.0315612
p18227	TPM=32.75 Putative ortholog: Os08g05570 monodehydroascorbate reductase, putative, expressed comp4090_c0_seq1_g1409	DVADADS[IL]VSS[IL]GNAK, EYV[IL]VGGGNAAGYAAR, TS[IL]PS[IL]FA[IL]GDVAAFP[IL]K, [IL]ATFW[IL]DSDSR	4	GAALPSAAAAAPRRRSFSVSAAAGFDNQNREYVIVGGGNAAGYAARTFVEHGMADGRLCIVSKEAVPPYERPALTKGYLFPPEKKPARLPGFHTCVGSGGQRQTAEWYKENGIEVLYEDPVEAFDGKTQTLKTSSGKILKYGSLIISTGCAAARLPEKIGGNLPGVHYIRDVADADSLVSSLGNAKKIVVIGGGYIGMEVAAAACGWNLDTTIIFPEDHIMPRLFTPSLAKKYEELYEQNGVKFVKGALIDKLDAGSDGRVSSAVLKDGSVVEADTVIVGIGAKPAVSPFEAVGVNNEVGGIEVDSMFRTSIPSIFAIGDVAAFPLKMYNRIARVEHVDHARKSAHHCIETLLTSQAKAYDYLPYFYSRVFEYEGSSRKIWWQFYGDNVGETVEVGNFD…	1.0625	1.04	1.04	0.9825	0.9875	1.0025	1.02, 1.22, 0.96, 1.05	0.99, 1.13, 1.09, 0.95	1.03, 1.14, 1.01, 0.98	1.01, 0.94, 1.05, 0.93	0.98, 0.93, 1.13, 0.91	1.04, 1.01, 0.93, 1.03	0.0557337	0.0420317	0.0348807	0.0286865	0.0497284	0.0249583
p8217	TPM=131.12 Putative ortholog: Os02g50620 dehydrogenase E1 component domain containing protein, expressed comp1224_c0_seq1_g993	DVATTPAE[IL]VAFFR, EHA[IL]ANGP[IL]V[IL]EMDTYR, ESPMPDVSE[IL]FTNVYVK, GGD[IL]VTAFAE[IL]MGR, VDGMDV[IL]AVK, [IL][IL][IL]AHD[IL]ATPAE[IL]K	6	MAAARPISDSTAPLTIETSMPFTAHIVDPPSRDVATTPAELVAFFRDMSLMRRMEIAADSLYKAKLIRGFCHLYDGQEAVTVGMEAAITRKDSIITAYRDHCIYLSRGGDLVTAFAELMGRQVGCSRGKGGSMHFYKKDANFYGGHGIVGAQVPLGCGLAFAQKYRKEDSVSFALYGDGAANQGQLFEALNISALWKLPAILVCENNHYGMGTAEWRAAKSPSYYKRGDYVPGLKVDGMDVLAVKQACKFAKEHAIANGPIVLEMDTYRYHGHSMSDPGSTYRTRDEISGVRQERDPIERVRKLLLAHDLATPAELKDMEKEIRKEVDTAIAKAKESPMPDVSELFTNVYVKGFGVESFGADRKELRATLP	0.995	1.01667	1.01833	1.02167	1.02167	1	0.97, 0.99, 1.03, 1.08, 0.94, 0.96	0.94, 0.96, 1.11, 1.01, 1.03, 1.05	0.9, 0.97, 1.07, 1.11, 1.08, 0.98	0.93, 0.98, 1.03, 1.02, 1.15, 1.02	0.97, 0.97, 1.07, 0.93, 1.1, 1.09	0.96, 1.01, 0.96, 1.1, 1.04, 0.93	0.021095	0.0252543	0.0330067	0.0298236	0.0299351	0.0256905
p5412	TPM=162.86 TMHMM=1 Putative ortholog: Os02g49320 sucrase-related, putative, expressed comp737_c0_seq1_g1013	DVEW[IL]PGSPEA[IL]K, SPAEWPSHVEATDSDR, YAGNV[IL][IL]FSSDAK	3	DAPEAAALPAAAGPDLDAEFGFQRPELGKEKLAGTVGFHQRHVFLCYKSPAEWPSHVEATDSDRLPRILAAAIKARKSNLSKSTKLTICEGEDGTESSLGDVLIFPDMIRYRGLTHFDVDNFVEEVLVKDVEWLPGSPEAIKGSYVFVCAHGSRDKRCGVCGPALITRFKEEIEGQGLNGQVAVSACSHVGGHKYAGNVIIFSSDAKGEVTGHWYGYVAPDDVPVLLHKHIGQGEIVDHLWRGQLGMTEEQQKKALELKHMTNGVTGEESSAKEANGTNGAACSPAPAGGCCQGNGGGFTCCQSDQPEEKQDKSVPAEENHKSSTAETDKESGKKGHMKICQMPNWFETWERKDTYATLAVVTAAATVFVAFRIYKNAN	1.02333	1.06	0.976667	0.956667	1.04	0.936667	1.03, 0.97, 1.07	1.27, 0.96, 0.95	0.99, 0.98, 0.96	0.96, 1.01, 0.9	1.24, 0.99, 0.89	0.78, 1.02, 1.01	0.0290593	0.10504	0.00881917	0.031798	0.104083	0.0783865
p140151	TPM=1.9 comp36850_c0_seq1_g338	DVGEAAPDAE[IL]SVEK, VAAEVGGGG[IL]DGEEVR	2	PGVSPFPSPYPLLPSPHLHLHLRRRNPATSTAALLVAGSTRGSMATTDARVAPAADERPPAADGDEVAAAEAAEGSKRVAAEVGGGGIDGEEVRFEGKDRSLAGSEANNGAVEAEEAEAAVGDAEEESDGEVEPAAAAAAEEESGDREPEAGDAEAAPLAPAPSDSTELGQGYASLPTPDAPVAEDKGELVDEPEESATSEVKDVGEAAPDAELSVEKLKDAEVVAGGEDDGEFGSQEEIAASTRSTEEDKVAPIAEANGKLGGEADAPVETVSLGGEETPEASLETVEDKAAEPEPESDASPVITAMENHAIVEDGAAKPETESDANPVVIDNGSLENHAN	0.96	0.93	0.89	0.925	0.97	0.955	0.93, 0.99	0.87, 0.99	0.83, 0.95	0.89, 0.96	0.94, 1.0	0.95, 0.96	0.03	0.06	0.06	0.035	0.03	0.005
p54241	TPM=14.8 TMHMM=1 SignalP=yes comp8679_c0_seq2_g1111	DVGVAPPG[IL]PGQGR, ETVPEVADPD[IL]V[IL]DDGER, S[IL]AAGVADPVADYPVR	3	MASRAAAALRTAALQGYRRSASTAAAHADGGAGAARTKAKSVGDYVPIYVALGMIGLSVTLGLHTARQQLAHAPNVRLDKRKRETVPEVADPDLVIDDGERFVGSSVFRKVAHVQDDRSLAAGVADPVADYPVRKAVTLKDVGVAPPGIPGQGREGVLERIFKKNTT	1.01333	1.00333	1.01667	1.00667	0.993333	1.01333	1.08, 0.99, 0.97	1.02, 1.01, 0.98	1.03, 1.0, 1.02	0.95, 1.01, 1.06	0.95, 1.01, 1.02	1.01, 0.99, 1.04	0.0338296	0.0120185	0.00881917	0.031798	0.0218581	0.0145297
p19421	TPM=20.18 Putative ortholog: Os01g51390 mitochondrial-processing peptidase subunit, mitochondrial precursor, putative, expressed comp6114_c0_seq1_g651	DVPAA[IL]DV[IL]SD[IL][IL]QHPR, S[IL]P[IL]MVTQS[IL][IL]GSWNR	2	MAAAAAAVRSKRRLLPYFHRLLHSAASPSPNRFLRHASPAPRAADHAPFFRLPAARVSTLPTGLRVVTQAYPAATRMASVGVWVDAGSRFELPGTNGTAHFLEHMAFKGTQRRPTAHALEVEIEDMGARLNAYTSREQTTFFADVQGRDVPAALDVLSDILQHPRFPQQAIQRERGVILREMEEVQGMMEEVIFDHLHTAAFRDHPLGDTILGPKENIQSISKNDLQQYISTHYTCPRTVVSAAGDVDHDEVVDKVKELFTGFSTDPTTADQLVEANPAVFTGSEVRIEDAEMPLAHLAIAFKGSSWTDPRSIPLMVTQSILGSWNRSIGVGNCSGSSLARGISTGELAESLMAFNTNYRDTGLFGIYTTAPPDALHDLSRLIMEEFRRLAFRVSETEV…	0.985	0.87	1.05	1.065	0.89	1.235	0.95, 1.02	1.0, 0.74	1.04, 1.06	1.09, 1.04	1.05, 0.73	1.04, 1.43	0.035	0.13	0.01	0.025	0.16	0.195
p13453	TPM=52.17 Putative ortholog: Os06g30460 2-oxo acid dehydrogenases acyltransferase domain containing protein, expressed comp3649_c0_seq3_g1161	DVQVGQP[IL]FVTVEDSED[IL]AK, DVV[IL]DP[IL][IL]AFR, NVPEANAYWDNAK, QTTPH[IL]Y[IL]SK, SGTFEDMTNTQ[IL]R	5	EPARPGPVGQLYRPDLRPFQESISLDGAPRFPKSGAAETASPPYLTASPPNLAAVIMLLRTRRCLPAALSRAAAHPRVSPAAASPGPPPQHGPVAVAVANQGSGIDPRSGPIDRFRGSTMARANLVALRPASIGGGRHKVGMQARWFSSTGLPPHMVIGMPALSPTMNQGNLTKWRKQEGDKIEVGDVICEIETDKATLEFESLEEGYLAKILVPEGSKDVQVGQPIFVTVEDSEDIAKIPADTSFRGEHDEDQSSGSATQSVKVDAAEQSPALRHISPTAKMLIKEHGLNISSLKASGPRGTLLKGDVLAALKAGTASSSAKEKTAPATPSPQPARDSQAQSLPTSQKSGTFEDMTNTQIRKVIAKRLLESKQTTPHLYLSKDVVLDPLLAFRNELKE…	0.93	0.934	1	1.078	1.008	1.08	0.91, 0.93, 0.9, 0.93, 0.98	1.0, 1.01, 0.95, 0.88, 0.83	0.92, 0.94, 1.07, 1.08, 0.99	1.02, 1.01, 1.19, 1.16, 1.01	1.11, 1.08, 1.06, 0.94, 0.85	0.92, 0.93, 1.13, 1.23, 1.19	0.013784	0.0347275	0.0327109	0.0399249	0.0489285	0.0652687
p7244	TPM=426.31 Putative ortholog: Os02g15250 late embryogenesis abundant domain-containing protein, putative, expressed comp288_c0_seq1_g609	DVT[IL]STGAQVAQK, DVT[IL]STGQTAAEYAK, VADKVEEPG[IL]DTGA[IL]AK	3	TTAGYTQQAAVKGKDVTLSTGQTAAEYAKTAAEKAKDAALAAGKTTAGYTQQAAVKAKDVTLSTGAQVAQKAKEVTADTAQKVAEYAKETAEQGKAAAARAEEKAKEAAARVADKVEEPGLDTGALAKGSSVKDGAGSMAQKASDRAGYVKDSVKDAAGGTAEKTRDMTAQTKGRAEDTTRDMGDRTGGVTAQVKDSAGAMAQKVTDTAAYIKDSVTGAAGRTVEKARDVGSQAGEAKNRAVETGKNATTGGGASETTKAKAEGTEEDTTIVGDVLEAVGATVYGIAKHTKGIVAGEEELIPVKGGDQAAKMEGRAKSD	0.99	1.16333	0.973333	0.98	1.17667	0.84	0.98, 1.01, 0.98	1.08, 1.2, 1.21	1.02, 1.0, 0.9	1.04, 0.98, 0.92	1.11, 1.18, 1.24	0.94, 0.83, 0.75	0.01	0.0417665	0.0371184	0.034641	0.0375648	0.0550757
p8263	TPM=187.67 Putative ortholog: Os01g70960 cytochrome c1-1, heme protein, mitochondrial precursor, putative, expressed comp512_c0_seq1_g1079	DVVSF[IL]SWAAEPEMEER, D[IL]VGVAYTEEETK, FPQPYPNEQAAR, [IL]SDRFPQPYPNEQAAR	4	MAAGRGLSQLLRKTLHSQSSGSSVLSSFRAKNEESSAGLRALALLGVGASGLLSFGTIASADEAEHGLAAADYPWPHEGILSSYDHASIRRGHQVYQQVCASCHSMSLISYRDLVGVAYTEEETKAMAAEIEVVDGPNDEGEMFTRPGKLSDRFPQPYPNEQAARFANGGAYPPDLSLITKARHNGQNYVFALLTGYHDPPAGVQIREGLHYNPYFPGGAIAMPKMLMDGAVEYEDGTPATEAQMGKDVVSFLSWAAEPEMEERKLMGVKWIFLLSLALLQAAYYRRMRWSVLKSRKLVLDVVN	1.04	1.0575	1.0575	1.0175	1.02	1.015	1.03, 1.02, 1.07, 1.04	0.95, 1.31, 1.03, 0.94	0.98, 1.12, 1.15, 0.98	0.95, 1.1, 1.08, 0.94	0.93, 1.29, 0.96, 0.9	1.03, 0.85, 1.13, 1.05	0.0108012	0.0865424	0.0451617	0.042106	0.0908295	0.0590903
p8219	TPM=140.11 Putative ortholog: Os03g56300 4Fe-4S binding domain containing protein, expressed comp978_c0_seq1_g994	DWNAVFER, S[IL]NT[IL]F[IL]TEMVR, VT[IL]NYPFEK	3	MAALLARQAALALRASQTAHLGPSATAMQGHLRTYMNAGAPKRFKEDEEKEQLAKELAKDWNAVFERSINTLFLTEMVRGLSLTLKYFFDRKVTINYPFEKGPLSPRFRGEHALRRYDSGEERCIACKLCEAICPAQAITIEAEEREDGSRRTTRYDIDMTKCIYCGFCQEACPVDAIVEGPNFEFSTETHEELLYDKEKLLENGDRWETEIAENLKSEALYR	0.956667	1.01	1	1.05333	1.06	0.99	1.01, 1.0, 0.86	1.03, 1.04, 0.96	1.0, 0.96, 1.04	0.99, 0.96, 1.21	1.02, 1.04, 1.12	0.97, 0.92, 1.08	0.0484195	0.0251661	0.023094	0.0788106	0.0305505	0.0472582
p2560	TPM=345.08 TMHMM=1 SignalP=yes Putative ortholog: Os03g50250 DnaK family protein, putative, expressed comp236_c1_seq1_g366	DYFDGKEPSK, EAEEFAEEDKK, EA[IL]EW[IL]DENQTAEK, FD[IL]NG[IL]PAAPR, FEE[IL]NND[IL]FR, NQ[IL]ETYVYNMK, SGGAPGGEGAEGGMEDEDHDE[IL], SQ[IL]HE[IL]V[IL]VGGSTR, VE[IL]ES[IL]FDGTDFSEP[IL]TR, VFSPEE[IL]SAM[IL][IL]GK, [IL]ADK[IL]ESEEK, [IL]NDAVVTVPAYFNDAQR, [IL]TPSWVGFTDGER	13	MDRVRGSALLLGVLLAGSLFALCAAKEEAKKLGTVIGIDLGTTYSCVGVYKNGHVEIIANDQGNRITPSWVGFTDGERLIGEAAKNQAAVNPERTIFDVKRLIGRKFEDKEVQRDMKLVPYKIVNREGKPYIQVKIKDGETKVFSPEEISAMILGKMKETAEAYLGKKINDAVVTVPAYFNDAQRQATKDAGVIAGLNVARIINEPTAAAIAYGLDKKGSEKNILVFDLGGGTFDVSILTIDNGVFEVLATNGDTHLGGEDFDHRIMDYFIKLIKKKYSKDISKDNRALGKLRREAERAKRALSNQHQVRVEIESLFDGTDFSEPLTRARFEELNNDLFRKTMGPVKKAMDDAGLEKSQIHEIVLVGGSTRIPKVQQLLRDYFDGKEPSKGVNPDEAVA…	1.04077	1.1	0.987692	0.951538	1.06	0.913077	1.08, 0.89, 0.92, 1.12, 1.12, 1.03, 1.05, 1.1, 1.03, 1.02, 1.05, 1.03, 1.09	1.5, 1.08, 1.02, 1.03, 0.91, 1.09, 1.09, 0.94, 0.99, 1.15, 1.46, 1.01, 1.03	1.16, 0.85, 0.95, 1.07, 0.92, 0.96, 0.98, 1.01, 0.96, 1.01, 1.0, 1.0, 0.97	1.08, 0.95, 1.04, 0.96, 0.82, 0.93, 0.93, 0.92, 0.94, 0.99, 0.95, 0.97, 0.89	1.39, 1.21, 1.11, 0.91, 0.81, 1.05, 1.04, 0.86, 0.97, 1.12, 1.39, 0.98, 0.94	0.77, 0.79, 0.93, 1.04, 1.02, 0.89, 0.9, 1.07, 0.97, 0.88, 0.68, 0.99, 0.94	0.0193305	0.0500513	0.0203544	0.0177896	0.0506876	0.0314273
p8214	TPM=1623.34 Putative ortholog: Os03g10110 cupin domain containing protein, expressed comp29_c0_seq1_g990	E[IL][IL]A[IL]A[IL]GQK, GFDVQ[IL][IL]R, QSV[IL]QV[IL]GK, VKEGDVFVVPR, VVAASEAGTVTAADVVDAAGTVYR	5	MAVATARWLILFLAVSATAWASADEEQWKAGGAVGGQVVQKEKRRVVAASEAGTVTAADVVDAAGTVYRLQFITMDPGALFLPVQLHADMVFYVHSGRGNVTYIQEGASESSSLEVERGDVYNFEQGSILYIHSYPNATRERLRIYAIFSSNAIGSDDPSHPTSEAYTSVSNLLKGFDVQILRLGFGVSPDVVEAIKSAKSPPSIIPYNPDQEKKQEGESSWTEDIFEALWGIGGPANKKKKKEKKEKGKKEKSKTFNFYSGKPDVENCFGWSKTMTNKDLQNLKGSNIGMFMVNLTTGSMMGPHWNPKATEIAIVTHGSGVVQTVCPSSPSSTGGESGHHKQGGRGGQEGERNHHEECKNSVFRVKEGDVFVVPRFHPMAQMSFNNGSFVFVGFSTHM…	1.042	1.014	0.95	0.916	0.978	0.94	1.02, 1.18, 0.96, 1.06, 0.99	1.01, 0.91, 0.95, 1.2, 1.0	0.84, 0.89, 0.97, 1.09, 0.96	0.82, 0.75, 1.01, 1.03, 0.97	0.99, 0.77, 0.99, 1.13, 1.01	0.83, 0.98, 1.02, 0.91, 0.96	0.0382623	0.0498598	0.0423084	0.0554617	0.0581722	0.0327109
p10420	TPM=80.73 Putative ortholog: Os01g43410 CAMK_CAMK_like.9 - CAMK includes calcium/calmodulin depedent protein kinases, expressed comp3761_c0_seq1_g46	E[IL][IL]AEVDTDNDGR, S[IL]DTDNSGT[IL]T[IL]EE[IL]R, [IL]TAAE[IL][IL]NHPW[IL]R	3	MEDVRATYTFGRELGRGQFGVTYLVTHKATGQRFACKSIATRKLVHRDDIEDVQREVQIMHHLTGHRNIVELRGAFEDRHSVNLIMELCEGGELFDRIIARGHYSERAAAGLCREMVSVVHSCHSMGVFHRDLKPENFLFLNNKEDSPLKATDFGLSVFFKHGEQFKDLVGSAYYVAPEVLKRHYGAEADIWSAGIILYILLSGVPPFWADTEDGIFEAVLLGNIDFSSDPWPSVSNGAKDLVKKMLRQDPKERLTAAEILNHPWIREDGEAPDKPLDITVISRMKQFRAMNKLKKVALKIVAENLSAEEITGLKEMFRSLDTDNSGTITLEELRSGLPKLGTKISESEIAQLMEAADVDGNGTIDYSEFVSATMHMNRLEKEDHILKAFEYFDKDHSG…	1.04	0.943333	1.00667	0.973333	0.91	1.06667	1.08, 1.09, 0.95	0.95, 1.0, 0.88	1.01, 1.12, 0.89	0.94, 1.03, 0.95	0.88, 0.92, 0.93	1.06, 1.12, 1.02	0.0450925	0.034801	0.0664162	0.02848	0.0152753	0.0290593
p13562	TPM=66.87 Putative ortholog: Os07g07250 eukaryotic translation initiation factor 3 subunit E, putative, expressed comp2449_c0_seq1_g53	E[IL][IL]DANSSSASPVNQ[IL]HSR, S[IL][IL]D[IL]GHPAAQEAAR, Y[IL]AAAVVVNK, Y[IL]NA[IL]QTNAPH[IL][IL]R	4	MAEYDLTARMVAHMDRHLALPLLEFLQELKVYADAQILQGKISLLSGTNMVDYAMDIHKSLHGTDDVPADMVARRSEVVERLRSLQDAVKPIVDFLSSPQLVQELRADKQYNLHVLQERHQIGPDQIEALYQYAKFQFECGMYSEAADFLAQYRALCTDSERSLSALWGKLAAEILMQNWDVALEELNRLKEIIDANSSSASPVNQLHSRIWLMHWSLFIFFNHENGRNGIIDLFFQDRYLNAIQTNAPHLLRYLAAAVVVNKRRRNMLKELIKVIQQEQQSYKDPITELLECLYVKYDFDGAQQKLIECEQVILNDPFLGKRIQGGNSITVPLRDEFLENARLLIFENYCRIHQCIDISVLAEKMNMTYDEAELWIMNLVKSSKLDAKIDSVKGTLIM…	0.9275	0.9125	0.9575	1.03	0.985	1.05	0.91, 0.9, 0.91, 0.99	0.89, 0.9, 0.96, 0.9	0.97, 0.94, 0.96, 0.96	1.06, 1.03, 1.06, 0.97	0.98, 0.99, 1.06, 0.91	1.09, 1.04, 1.0, 1.07	0.0209662	0.0160078	0.00629153	0.0212132	0.0306866	0.0195789
p9279	TPM=137.51 Putative ortholog: Os03g63410 elongation factor Tu, putative, expressed comp761_c0_seq1_g382	E[IL][IL]SFYK, FPGDE[IL]P[IL]VR, GSA[IL]HA[IL]NGTNDE[IL]GK, HF[IL]MP[IL]EDVFS[IL]QGR, M[IL]DHGEAGDNVG[IL][IL][IL]R, TGEDVE[IL][IL]G[IL]TETGPVK, [IL]E[IL]PEPVK	7	MAAGLWARSMATFTRTKPHVNVGTIGHVDHGKTTLTAAITKVLSESGNAKSIAFEEIDKAPEEKARGITISTAHVEYETAKRHYAHVDCPGHADYVKNMITGAAQMDGGILVVSAPDGPMPQTKEHILLARQVGVPSLVCFLNKVDVVEDEELLELVEMELRELLSFYKFPGDEIPIVRGSALHALNGTNDEIGKNAILKLMDEVDRYIPDPVRVLDKHFLMPIEDVFSIQGRGTVVTGRIEQGMIKTGEDVEILGLTETGPVKTTVTGVEMFKKMLDHGEAGDNVGLLLRGLKRGDVQRGQVVCKPGCLKTYKKFEAEIYVLTKDEGGRHTAFMSNYSPQFYFRTADITGKIELPEPVKMVLPGDNVTAIFELISPIPLEPGQRFALREGGRTVGAGV…	0.951429	1.02714	0.994286	1.04429	1.08143	0.977143	0.91, 0.93, 0.91, 0.96, 1.02, 0.97, 0.96	1.1, 1.07, 0.86, 0.98, 0.95, 1.24, 0.99	0.93, 1.07, 1.02, 0.95, 0.96, 1.1, 0.93	1.02, 1.15, 1.12, 0.99, 0.94, 1.13, 0.96	1.22, 1.14, 0.95, 1.02, 0.94, 1.27, 1.03	0.84, 1.0, 1.19, 0.97, 1.01, 0.89, 0.94	0.014708	0.0462763	0.026264	0.0330121	0.0492529	0.0421852
p40089	TPM=129.43 TMHMM=1 SignalP=yes comp1059_c0_seq2_g254	E[IL]AQQYG[IL]QGFPT[IL]K, GVATVAA[IL]DADAHK, SAFQ[IL]AE[IL]TEFVK, S[IL]ANFA[IL]SQVK, VEGFPT[IL][IL]VFGADK, VF[IL]PGKPPVDYAGGR	6	MAESRSFWLPGSAADRHHLAPRPGNQKLLESAMRPAFLAALLLLVAAAASPAAALYSAGSPVLQLSPSNFKKVLNANGVVLVEFYAPWCGHCKQLTPTWEKAAGVLKGVATVAALDADAHKELAQQYGIQGFPTIKVFLPGKPPVDYAGGRDVKSIANFALSQVKALLRDRLDGKASSGKTSGGSSEKKTEKSESVELNSSNFDELVIKSKDLWIVEFFAPWCGHCKKLAPEWKRAAKNLKGQVKLGHVDCDSDKSLMSKYKVEGFPTILVFGADKESPLPYQGARVASAIESFALEQLEANSAPPEVHELTSSDVMEEKCASAAICFVSFLPDILDSKAEGRNKYLELLLSVAEKFKKSPYSFVWAGAGKQADLEKQVGVGGYGYPAMVALTVKKGAY…	1.00333	1.11167	1.03667	1.03333	1.10833	0.931667	1.0, 1.0, 1.04, 0.99, 1.01, 0.98	1.08, 1.06, 1.11, 1.18, 1.05, 1.19	0.95, 0.96, 1.14, 1.03, 0.95, 1.19	0.95, 0.96, 1.1, 1.03, 0.94, 1.22	1.08, 1.06, 1.07, 1.19, 1.04, 1.21	0.88, 0.91, 1.03, 0.87, 0.9, 1.0	0.00843274	0.0246869	0.0428693	0.0448454	0.0295992	0.0272539
p14137	TPM=61.57 Putative ortholog: Os01g69130 dynamin family protein, putative, expressed comp2752_c1_seq2_g1370	E[IL]HNF[IL][IL]TT[IL]YR, GYS[IL]DSDATG[IL]PR, KNVEDFVPK, SA[IL]FVPEVPFEV[IL]VR, S[IL]SNE[IL]QQFP[IL][IL]R, T[IL]DE[IL]P[IL]EAETVER, [IL][IL][IL]QSYYN[IL]VR	7	VGSSVIPIVNKLQDIFAQLGSNSTIDLPQVAVVGSQSSGKSSVLEALVGRDFLPRGSDICTRRPLVLQLVHQPLRPSGVDADEWGEFLHQPGRRYSDFREIRREIQAETDREAGGNKGVSDRQIRLKIHSPNVLNITLVDLPGITKVPVGDQPTDIEARIRTMILSYIKHKTCIILAVSPANADLANSDALQMARQADPDGSRTIGVITKLDIMDRGTDARNFLLGNVIPLRLGYVGVVNRCQQDIISDLSIKDALAREEKFFRNQPAYNGLAQYCGIPQLAKKLNQILVQHIKTILPGLKSRISSQLTAIAKEHAFYGDPVESKAGQGAKLLNILAKYCDAFSSMVEGKNEDISTIELSGGARIHYIFQFIFVKSLEGVDPCEDVTDEDIRMAIQNAT…	1.01571	0.997143	1.01	0.995714	0.987143	1.02143	1.11, 1.24, 0.93, 0.98, 0.89, 0.97, 0.99	1.16, 1.08, 1.11, 0.9, 0.91, 0.96, 0.86	1.11, 1.13, 0.85, 1.03, 0.97, 0.98, 1.0	1.0, 0.91, 0.91, 1.05, 1.08, 1.02, 1.0	1.04, 0.88, 1.2, 0.92, 1.02, 0.99, 0.86	0.96, 1.04, 0.76, 1.14, 1.06, 1.03, 1.16	0.0453482	0.0445461	0.0355233	0.0245781	0.0440083	0.0505413
p18223	TPM=32.91 Putative ortholog: Os07g43390 4-alpha-glucanotransferase, chloroplast precursor, putative, expressed comp5007_c0_seq1_g1380	E[IL]PDGYEQMTPVVDDAQR, SDVSWA[IL][IL]STA[IL]SSVAR	2	KELPDGYEQMTPVVDDAQRRRAGVLLHPTSLRGPHGVGDLGDQALAFLSWLRDAGCTLWQVLPLVPPGRKSGEDGSPYSGQDANSGNTLLISLEELVKDGLLMEDELPDPLDLEYVEFDTVANLKEPLIAKAAERLLLCPGELRMQYDEFKKNPDISGWLEDAALFAAIDNSIDAVSWYEWPEPLKNRHPGALKDIYEKQKDFIEIFMAQQFLFQKQWQRVRSHAQKLGISIMGDMPIYVGYHSADVWANRKSFLLDKKGFPTFVSGVPPDAFSETGQLWNSPLYDWKSMEADGFAWWVKRIKRALDLYDEFRIDHFRGLAGFWAVPSGAKVAMVGSWRKSIGAPGMAVLQFAFGGGPGNPHLPHNHELNQVVYTGTHDNDTVVGWWRTLPEEEKLTVL…	0.82	0.84	0.98	1.195	1.015	1.185	0.91, 0.73	1.0, 0.68	1.1, 0.86	1.21, 1.18	1.1, 0.93	1.1, 1.27	0.09	0.16	0.12	0.015	0.085	0.085
p59883	TPM=130.7 comp905_c0_seq1_g1619	E[IL]PPAPSGQ[IL]PQSPDDEK, S[IL]EDCAQ[IL]AK, VEGVTGDVSAMK, YNEQTV[IL]SA[IL]DK	4	PGAALHPSQMEILRATASSTTSSSLHGAAIHPSQVETPACDTSRGHARPVASRPTIAILLARPVDLQRYAGAPTYFRRQMSSAGSPSPSDPSLGKEIPPAPSGQLPQSPDDEKSEVVCKYNEQTVLSALDKISEKVETVDTKVEGVTGDVSAMKTQLQKSIEDCAQLAKDVAQIKKREEGSGDWTAFRIRGKNLNWLSVGSAVWELLKGLFK	1.0425	1.0875	1.0925	1.0475	1.05	1.0025	1.11, 1.18, 0.96, 0.92	1.13, 1.2, 1.05, 0.97	1.22, 1.2, 0.99, 0.96	1.11, 1.01, 1.02, 1.05	1.03, 1.02, 1.09, 1.06	1.08, 1.0, 0.94, 0.99	0.0614241	0.0497284	0.0682367	0.0225	0.0158114	0.0289756
p57636	TPM=752.19 comp238_c0_seq2_g955	E[IL]PPYDADWYY[IL]R, QG[IL]G[IL]GGFQK	2	MATEAPAETAASTARTVKDVNPHAFVKAYSAHLKRSGKMELPEWVDIVKTARFKELPPYDADWYYIRAASMARKIYLRQGIGIGGFQKI	0.975	1.045	1.045	1.075	1.08	1	1.03, 0.92	1.07, 1.02	1.02, 1.07	0.99, 1.16	1.05, 1.11	0.95, 1.05	0.055	0.025	0.025	0.085	0.03	0.05
p58131	TPM=128.86 comp1987_c0_seq7_g118	E[IL]SATTGDDQEEVSEEDVNK, F[IL]PGGAGEG[IL]DVTGNR	2	MVNLCSEFMDAGTDTTSTGLQWIMAELVKNPSIQDTLYKEISATTGDDQEEVSEEDVNKMPYLKAVVLEGLRKHPPAHFVLPHTAAEDTEVGGYLIPKGATINFMVAEMSRDEREWEKPTEFVPERFLPGGAGEGIDVTGNRGIKMMPFGVGRRICAGVGIAMLHLEYFVANMVREFEWQEVPGKEVDFAEKPEFTVVMKKPLRPRLVALSKQEPNQIACLVASAIVEEELLHTDENERELRTRDTRPEGRKISPDHFSNVSARQVFFLLYSNNKRKARESNGVTQMIRVHRTRRRASHDHEIATIQPSLFISSDVAPNAIWTGAWNRSPRLY	1.075	1.075	1.01	0.94	1.005	0.96	1.06, 1.09	1.24, 0.91	1.03, 0.99	0.97, 0.91	1.17, 0.84	0.84, 1.08	0.015	0.165	0.02	0.03	0.165	0.12
p17162	TPM=43.74 Putative ortholog: Os06g01500 IQ calmodulin-binding motif family protein, putative, expressed comp4078_c0_seq1_g214	E[IL]SPQDAA[IL][IL][IL]QMNYR, FD[IL]PQGGA[IL]PNEK, S[IL]FYN[IL]NYR, WEAE[IL]ASPNDDGFDR, WEAE[IL]ASPNDDGFDRK	5	LALAARAPQPARRKYTYAASSPGGRKVKWTAEEKPRTGHRALKWEAELASPNDDGFDRKWKWEAKSKAGAAGKAKTKWGTEIKGKGCLEPWSHAYAWEEDFSGSDEEDEEEERYNRKPEKKKKEIKPAAKEDKKKTTKCVQIEEIPEDNTAGCDAIRKAFAMGNDKGKAKELSPQDAALLIQMNYRAHLAHRSQVLRCLRDLAVAKAKLKELRSLFYNLNYRRRCSHDHEERQRFSEKIIVLLLTVDALEGPDFMVRTAKKSMLEELEGMLEIVDPQPPGKERSFSRRKFDLPQGGAIPNEKSAAVNNTVKVINTGKGK	0.976	0.958	0.992	1.02	0.984	1.04	1.01, 0.98, 0.9, 1.05, 0.94	1.0, 1.07, 0.89, 0.95, 0.88	1.16, 0.95, 1.01, 0.97, 0.87	1.15, 0.97, 1.13, 0.92, 0.93	0.99, 1.1, 0.99, 0.91, 0.93	1.16, 0.89, 1.14, 1.02, 0.99	0.0261916	0.0354119	0.0477912	0.0497996	0.0331059	0.0498999
p12916	TPM=63.61 Putative ortholog: Os01g09560 mitochondrial-processing peptidase subunit alpha, mitochondrial precursor, putative, expressed comp2416_c0_seq1_g1240	E[IL]TS[IL]ATPGQVDQTQ[IL]DR, NPA[IL][IL]DWEVK, SA[IL][IL]AS[IL]ESK, [IL]NH[IL]VNEFDQ[IL]K, [IL][IL]SSP[IL]TMASHGNV[IL]NVPAYETVR	5	GTWWPSTCPTVSVPISASAAPSAGAAGDHSVERILRQAPATMYRAASGLGALKQRGADAQMLNIAIRSASTSVAQRSSSGGFLSWLTGAPSSALLPPDFALPGVTIPEPLPDLVKPSETKITALSNGVKIASETSPGSSCAVGVYVNSGSVYEAPETLGATQLLKKLAFTTTRNRSQLRVVREICAIGGNAKASANRELTSYSYGALKTYMPEMVEVLVDCVRNPALLDWEVKEEITKLKAELAQASTNPESFLLDALHSAGYSGALANPLIASEASISRLNTDVLEEFLAENYTSPRIVLAASGVDHDELVSIAEPLLSDIPNATGTVKPKSVYVGGEYRRAADSSNTDIALAFELPGGWLKEKDYVTASVLQTLLGGGGLFSWGRPGKGLHSRLNHL…	0.954	1.084	0.984	1.032	1.138	0.934	1.0, 0.89, 0.95, 1.01, 0.92	1.13, 1.26, 1.02, 1.24, 0.77	1.04, 0.92, 0.98, 1.04, 0.94	1.04, 1.03, 1.04, 1.03, 1.02	1.13, 1.41, 1.08, 1.23, 0.84	0.92, 0.73, 0.96, 0.84, 1.22	0.0229347	0.0894763	0.0248193	0.00374166	0.0934559	0.0815843
p1812	TPM=87.03 TMHMM=1 Putative ortholog: Os08g29650 RNA recognition motif containing protein, expressed comp1839_c0_seq1_g1615	E[IL]TTAPVSEVEDVK, F[IL]GPPN[IL]FH[IL]VK, RPAEE[IL]E[IL]TK, [IL]NQANS[IL]EE[IL]DE[IL][IL]AR, [IL]Q[IL]SYEDEK	5	SASLESSTPDDTPTQAESDPIVLDKELEKETSAPSDVAAPEEQQDGVSASLESSTPDDTPTQAESDPIVLDKELEKETSAPSDVAAPEEQQDGGTASLESSSPDDTPTQAESDPIVSESDPIVSESDPIVLESDGSGEQSKEEEIDAEIKELGTDGSGVSEVNGQHDAGVSADSCVTATEPVIHLDEGKHQQSVVTELVEQDGSNGHAHVEPIADSCTSAPESDTDGGLEQQSDALEAEPEVSDGSNCGAYKGPVEEEVAANGLGCAEDTLNTSAELETAVDEGEGEVASGVVETEAVIGKDSEGDLHDGQAVAVTSDDEAKPPAEEGINEAIPAEAGVCVITGNVSEPVVQDDELVKNDVSSGILHSEQSEPDQVVELKGGQEVQVEVASGDGNTPVS…	0.974	1.014	1.02	1.048	1.038	1.012	0.93, 0.97, 0.98, 1.01, 0.98	0.94, 0.96, 1.04, 1.15, 0.98	1.0, 0.94, 1.07, 1.06, 1.03	1.08, 0.97, 1.09, 1.05, 1.05	1.01, 0.99, 1.06, 1.13, 1.0	1.06, 0.98, 1.03, 0.93, 1.06	0.0128841	0.0378946	0.0234521	0.0210713	0.0259615	0.0251794
p7273	TPM=126.43 Putative ortholog: Os11g39220 acyl-coenzyme A oxidase, putative, expressed comp549_c0_seq1_g683	E[IL]VDAFD[IL]PDQ[IL][IL]R, GGEPADMG[IL]HAF[IL]VP[IL]R	2	MATTSRSGSAPDDEDSNSTPAMRRLRRLSLHLLQPSDRPSDSLVPAACAGKRRAGGLDADAAALTAYLRGRHRAMQARVYEFYVARPELQTPVELPTAAHRELCFRQMSALVRDAGVRPLTLMASDPAEYFAVMEAVGGLDISLAIKVGVQYSLWGGSIINLGTKKHKEKYFDRIDNLEYPGCFAMTELHHGSNVQALQTTATFDPVTDEFIIDTPNDGAIKWWIGNAALHGKFATVFARLILPLQGKGGEPADMGIHAFIVPIRDLETHAVLPGIEINDCGHKIGLNGVDNGALRFCSVRIPRDNLLNRFGDVARDGKYTSSLPTINRRFAATLGELVGGRVGLAYSSVGVLKVAVTIAVRYALLRQQFGPPKQPEISVLDYQSHQHKLMPMLASAYA…	1.06	0.94	1.045	0.985	0.89	1.115	1.14, 0.98	0.96, 0.92	1.13, 0.96	0.99, 0.98	0.84, 0.94	1.18, 1.05	0.08	0.02	0.085	0.005	0.05	0.065
p51080	TPM=217.79 TMHMM=1 SignalP=yes comp523_c0_seq2_g1366	E[IL]VDD[IL]DTFK, GY[IL][IL]HGPPGTGK, TFAT[IL]AMDPAR	3	MEASGWSTSLSSGIVLSLVAVVWTMLWNNLQGLQLQQFVSRHLSRHARRLAAIVDPYLTVTIAEYDGGRMKRSDAYKEVQAYLQRATCATGGGVRHLKAETAKDVDALVLSMGDNEEVADAFRGATVWWLAYSTPPREDNAPSYWGGGRAARADRRFYRLFFLERHRDLVLGEYLPHVRREGRAVMVKNRQRKLFTNLSGDGYDADGMWSESVWSHVVFEHPKTFATLAMDPARKKEIVDDLDTFKNGKDYYARVGKAWKRGYLLHGPPGTGKSAMIAAMANHLDYDVYDIELTSVSSNTDLRRLFIETTSKSIIVIEDIDCSLDLTGTRTKKTDDKPPKVDGDGRKGAAADTSSKVTLSGLLNFID	0.996667	1.01333	0.973333	0.986667	1.02	0.973333	0.94, 1.12, 0.93	1.15, 1.05, 0.84	1.07, 0.88, 0.97	1.13, 0.78, 1.05	1.22, 0.93, 0.91	0.93, 0.84, 1.15	0.0617342	0.0913479	0.0548736	0.105883	0.100167	0.0920748
p6671	TPM=143.48 Putative ortholog: Os02g55140 leucine aminopeptidase, chloroplast precursor, putative, expressed comp434_c0_seq1_g747	E[IL]VNAPANV[IL]TPAV[IL]AEEAAK, MGSY[IL]GVAAASANPPR, [IL]G[IL][IL]G[IL]GQTAPSTA[IL]ACR, [IL]T[IL]ADA[IL]VYACNQGVDK	4	LRRAPHLLRRLPRAPPAALSSRSSPSSSFGAAAALRRPLGHRARMGHTSAAASSSVPALGLTKANAVELPQVTFTGKDTDFSAWTGDILAVAVTEKDLTKGPDSKFENAVLRKLDEQLGGLLSEASAEEDFTGKSGQSVVLRLSGQGFKRLGLIGLGQTAPSTALACRAIGESVASLAKSAQAASVAVVLAGIQEEFKLNAAASIASGTVLGLHEDSRFKAEAKKVHLKQVDLIGLGSGPEVDQKLKYANDLCSGVIFGKELVNAPANVLTPAVLAEEAAKIASTYSDVFTATILDEEKCQELKMGSYLGVAAASANPPRFIHLCYKPVGGNVKRKLAIVGKGLTFDSGGYNIKTGPGCSIELMKFDMGGSAAVFGAAKALAQIKPPGVEVHFIVAACE…	1.1025	1.025	1.0675	0.9675	0.94	1.055	1.15, 1.15, 1.11, 1.0	1.12, 0.84, 1.04, 1.1	1.12, 1.09, 1.11, 0.95	0.97, 0.95, 1.0, 0.95	0.98, 0.73, 0.94, 1.11	1.0, 1.3, 1.06, 0.86	0.0354436	0.0639661	0.03966	0.0118145	0.0788458	0.0917878
p72241	TPM=17.21 comp6610_c0_seq2_g246	E[IL]VNTFPSNASYNTQR, G[IL]GEMMP[IL]Q[IL]WETTMDPER, T[IL]DGGTH[IL]EG[IL]K, [IL]V[IL][IL]TDADVDGAH[IL]R	4	SGRRIPPSFLSSRTPASASRIAIPHPPAAATPASTGPMARRSAPLLRRLLSTAPAPSRLLPGPSPSARLLFRPRVVAAAAAVPQRNGVAARALMSSTAASDAMHEKRVAGEYTAANVQVLEALDGVRKRPGMYIGSTGPRGLHHLVYEILDNAVDEAQAGYATEINVVLHEDNSVSITDNGRGIPTDIHPQTKKSCVETVLTLMHAGGKFGGSTSSYSVAGGLHGVGLSVVNALSEALEVTVCRDGKEYRQSYSRGKPLTSLSSTRLPDESSSRQGSCIRFWPDKEIFTTTIEFDFDTISSRIRELAFLNPELRITLTKEEDDAQVQHNEYCYAGGLVEYVAWLNTDKKPLHDPIAFRKELDGIIVDVSLQWCSDSYSDTVLGYANSIRTIDGGTHIEG…	1.0825	0.945	0.9825	0.915	0.895	1.0475	1.05, 1.34, 0.98, 0.96	0.91, 0.87, 1.07, 0.93	0.96, 1.09, 0.94, 0.94	0.92, 0.81, 0.95, 0.98	0.87, 0.65, 1.09, 0.97	1.06, 1.25, 0.87, 1.01	0.0879749	0.0434933	0.0361421	0.037081	0.0932291	0.0785679
p3674	TPM=23.81 TMHMM=8 Putative ortholog: Os05g33390 cation-transporting ATPase, putative, expressed comp3854_c0_seq1_g659	E[IL]VP[IL]H[IL]QK, [IL]TGTE[IL][IL]PGD[IL]VS[IL]GR	2	PSSPSSIGVETRSERPFPGDPAATPLDPSGRGAGMARFEVNGKSVEGVDLLRRRHWTARLDFWPFLALYALWLLLAVPALDFTDALVILGVLSASHILAFLFTAWSVDFRAFVGHSKVKDIHAANACKVIPAKFLGSKEIVPLHIQKTVASSSASGETEEIYFDFRKQRFFYSAEKDNFFKLRYPTKDLFGHYIKGTGYGTEAKINTAVDKWGRNIFEYPQPTFQKLMKEQCMEPFFVFQVFCVGLWCLDEYWYYSLFTLFMLFLFESTMAKNRLKTLTELRRVKVDNQIVLTYRCGKWVKITGTELLPGDIVSIGRSPSGEDRSVPADMLLMAGSAIVNEAILTGESTPQWKVSVAGRGPDEMLSIKRDKNHILFGGTKILQHTPDKSVNLRAPDGGC…	1.035	0.985	0.95	0.925	0.95	0.975	1.0, 1.07	1.02, 0.95	0.91, 0.99	0.92, 0.93	1.02, 0.88	0.9, 1.05	0.035	0.035	0.04	0.005	0.07	0.075
p6988	TPM=99.15 Putative ortholog: Os07g10500 cytochrome b-c1 complex subunit 7, putative, expressed comp1755_c0_seq2_g1447	EA[IL]GA[IL]P[IL]YER, M[IL]SS[IL]SAWFVNPR, YDD[IL]YDPYND[IL]D[IL]K	3	MLSSLSAWFVNPRKNPLARLHMKTVAYRLSNYGLRYDDLYDPYNDLDIKEALARLPREVVDARNQRLKRAMDLSMKHQYLPDDVKALQTPFKSYLSDMLALVKKERAEREALGALPLYERTLP	1.07333	1.04333	1.05	0.98	0.976667	1.00667	1.12, 1.13, 0.97	0.97, 1.12, 1.04	0.97, 1.19, 0.99	0.87, 1.05, 1.02	0.87, 0.98, 1.08	1.01, 1.06, 0.95	0.0517472	0.0433333	0.0702377	0.0556776	0.0606447	0.031798
p76183	TPM=25.77 comp6946_c0_seq2_g1205	EA[IL]TSMVAS[IL]SSEGFPQ[IL]AER, S[IL]HPSDGA[IL]A[IL]VVR, T[IL][IL]QEFPSA[IL]GPDT[IL]K	3	MWSRHLLRRLLPSPVTAGTPSPLIRHLSTTAAPTTDITAIASSLAAAVTKLSSTPPPATSPEAYFSLHFSDVRPTTALLAETLSLSPPATSRAAADLFRFLVRRSLHPSDGALALVVRHLARRRDFPAVRTLLQEFPSALGPDTLKAYLFHLARAGRATDALKVFDELHGQLRTREALTSMVASLSSEGFPQLAERAVKKVAHEIFPDDNICTLLVSGYADAGKLDHALRLIGETRNGGFQPGLDAYNAVLDCVCRLCRKKDPLRMPAEAEKFLIDMEANGIPRDAGTFRVLIKNLCKIRRTEDAMNLFRRMGEWGCSPDADTYLILIKSLYQAARISEGDEMVTWMRSAGFGDKLDRKAYYGFIKVLCGIERVEHAIKVFRMMKGYGHAPGTKSYSLL…	1.03	0.953333	1.08333	1.04667	0.926667	1.15	1.14, 0.92, 1.03	0.93, 0.88, 1.05	1.27, 0.99, 0.99	1.11, 1.07, 0.96	0.81, 0.95, 1.02	1.38, 1.13, 0.94	0.0635085	0.0504425	0.0933333	0.0448454	0.0617342	0.12741
p7411	TPM=139.15 Putative ortholog: Os04g37500 glutamate decarboxylase, putative, expressed comp873_c0_seq1_g1001	EAAYQ[IL][IL]SDE[IL]M[IL]DGNPR, FSVFD[IL]SEN[IL]R, NYVDMDEYPVTTE[IL]QNR, [IL][IL]ND[IL][IL]VEK	4	GRGRDACRGARIRVPRHTKQKGTFLRRVRPLSRPTSTSPPLRPGQASTESTPPPHIHLHGTTFPRARGRFPSPRAADLPSLSPCKPRPRHRATMVLTVAATAADTAEPLNSTFFATRYVRDQLPRYRMPENSIPKEAAYQIISDELMLDGNPRLNLASFVTTWMEPEVGKLIMDSVNKNYVDMDEYPVTTELQNRCVNMIAHLFNAPIKEEETAIGVATVGSSEAIMLAGLAFKRKWANKRKEEGKPYDKPNIVTGANVQVCWEKFARYFEVELKEVKLTEGYYVMDPLKAVEMVDENTICVAAILGSTLTGEYEDVKLLNDLLVEKNKKTGFNVPIHVDAASGGFIAPFLHPELEWDFRLPLVKSINVSGHKYGLVYPGVGWVIWRSKDDLPEELIFH…	1.0325	0.98	0.9925	0.9625	0.9525	1.01	1.1, 0.99, 1.01, 1.03	0.89, 0.92, 0.95, 1.16	0.95, 0.95, 0.88, 1.19	0.87, 0.96, 0.87, 1.15	0.81, 0.94, 0.94, 1.12	1.07, 1.02, 0.93, 1.02	0.0239357	0.0612372	0.0678694	0.0660019	0.0636887	0.0291548
p8734	TPM=178.6 Putative ortholog: Os08g02420 OsCML7 - Calmodulin-related calcium sensor protein, expressed comp1057_c0_seq1_g745	EAFS[IL]FDTDGDGR, EVEVAADGT[IL]R	2	GDLANRRRHGTTATNPTFHFSPLSHHHQTNQTQTPLRRTHRTAPRRFARSPTPSHPHPDPTSPAAMAGKDLSDEQVASMREAFSLFDTDGDGRIAPSELGVLMRSLGGNPTQAQLRDIAAQEKLTAPFDFPRFLDLMRAHLRPEPFDRPLRDAFRVLDKDASGTVSVADLRHVLTSIGEKLEPHEFDEWIREVEVAADGTIRYDDFIRRIVAK	0.925	0.855	1.115	1.21	0.925	1.31	0.96, 0.89	0.89, 0.82	1.06, 1.17	1.11, 1.31	0.93, 0.92	1.2, 1.42	0.035	0.035	0.055	0.1	0.005	0.11
p35425	TPM=4.08 Putative ortholog: Os12g14930 ATP synthase protein MI25, putative, expressed comp29137_c0_seq1_g211	EAFVP[IL]D[IL][IL]R, [IL]AT[IL][IL]NA[IL]SSR, [IL]CSTVVES[IL]PTAR	3	VRFVLIDPFHRVWVSYATSVHVHVTCSIRLPLEKPRTTPISVSFLFSGAELKNMELPYDEIEFNGYEGYQYAICCYSIYLCINRKSLGKTFKETLDGRIESIQEELLQFFNPNEVILEESNEQQRLLRISLRICSTVVESLPTARCAPKCEKTVQALLCRNLNVKLATLLNAISSRRIRLQDDIVTGFHFSVSERFVSGSTFKASTVEQIREAFVPIDLIREGLIVLRKVRVGGSI	1.10333	0.953333	0.986667	0.9	0.863333	1.08	1.02, 0.97, 1.32	1.1, 0.64, 1.12	1.01, 0.86, 1.09	0.98, 0.89, 0.83	1.08, 0.66, 0.85	0.91, 1.36, 0.97	0.109291	0.156773	0.0674125	0.043589	0.121427	0.141067
p7985	TPM=90.59 Putative ortholog: Os05g06300 3-hydroxyacyl-CoA dehydrogenase, putative, expressed comp832_c0_seq1_g489	EANAFQS[IL][IL]FSDTCK, GGVM[IL]WGDS[IL]GAK, G[IL]P[IL]SAPSNQVK	3	MAAKGRTEMEVGADGVAVITICNPPVNSLSIDVLVSLKESYEEALQRKDVKAIVVTGKGGKFSGGFDISSFGNLHSGEIEQPKVGYISIDIITETLEGATKPSVAAIDGLALGGGLEVAMACHARISTPTAQLGLPELQLGIIPGFGGTQRLPRLVGLTKSLEMMLLSKPIKGEEAHQLGLVDSLVSPNDLVNAARRWALDICELKRPWIKSLYKTDKLEPLGEAREILNFARAQARKQAANLEHPLVCIDVIEEGIVSGPRAGLWKEANAFQSLLFSDTCKSLLHVFFSQRATSKVPGATDLGLMPRKITKVAILGGGLMGSGIATAMILSNYPVLLKEVNEKFLNAGIDRIKANLQSRVRKGKMTEERYEKALSLVTGTLGYEKFKEVDLVIEAVIE…	1.10333	1.18	0.93	0.856667	1.05	0.83	1.35, 1.01, 0.95	1.64, 1.06, 0.84	1.0, 0.97, 0.82	0.74, 0.96, 0.87	1.21, 1.05, 0.89	0.61, 0.91, 0.97	0.124544	0.238607	0.0556776	0.0638575	0.092376	0.111355
p4466	TPM=217.79 TMHMM=1 SignalP=yes Putative ortholog: Os03g58790 ATPase, putative, expressed comp523_c0_seq1_g1357	EANMTPADVAEN[IL]TPK, EV[IL]DD[IL]DAFR, GY[IL][IL]YGPPGTGK, SVDDDADSC[IL]AG[IL]VK	4	MEASGWSTSLSSGIVLSLVAVVWTMLWNNLQGLQLQQFVSRHLSRHARRLAAIVDPYLTVTIAEYDGGRMKRSDAYKEVQAYLQRATCATGGGVRHLKAETAKDVDALVLSMGDNEEVADAFRGATVWWLAYSTPPREDNAPSYWGGGRAARADRRFYRLFFLERHRDLVLGEYLPHVRREGRAVMVKNRQRKLFTNLSGDGYDADGMWSESVWSHVVFEHPKTFATLAMDPAKKKEVIDDLDAFRKGKDYYARVGKAWKRGYLLYGPPGTGKSTMIAAMANHLDYDVYDIELTSVRTNTDLRKLFIETTSKSIIVIEDIDCSLDLTRARKKKKKATDDGQKNDGDKKDGAEPPDEEKDAGGSKVTLSGVLNFIDGLWSACGGERIIVFTTNHVEKLDP…	0.9825	1.025	1.045	1.065	1.0425	1.0275	0.88, 0.99, 0.98, 1.08	0.9, 0.97, 1.09, 1.14	1.03, 1.07, 1.01, 1.07	1.17, 1.07, 1.03, 0.99	1.02, 0.98, 1.11, 1.06	1.15, 1.1, 0.93, 0.93	0.0409013	0.0548483	0.015	0.0386221	0.0278014	0.0572094
p9994	TPM=200.27 Putative ortholog: Os01g42650 cytochrome c oxidase subunit 5B, mitochondrial precursor, putative, expressed comp850_c0_seq1_g326	EAPAV[IL]ESYYDK, EAPAV[IL]ESYYDKR, EE[IL]EGY[IL]QGK	3	PTPITARAAPFSAAAAAFRRTTPLLSGDKPLTVEDIVPIATGHEREELEGYLQGKKRFDMDAPCGPFGTKEAPAVIESYYDKRIVGCPGGEGEDEHDVVWFWLKKDEPHECPVCSQYFTLKVIGDGGNPDGHDTDDEGHHH	0.973333	1.13333	0.926667	0.956667	1.17	0.813333	0.97, 0.97, 0.98	1.24, 1.11, 1.05	1.02, 1.02, 0.74	1.05, 1.06, 0.76	1.28, 1.15, 1.08	0.82, 0.92, 0.7	0.00333333	0.0560753	0.0933333	0.0983757	0.0585947	0.0635959
p21501	TPM=24.85 Putative ortholog: Os06g05080 cytochrome c oxidase subunit 5B, mitochondrial precursor, putative, expressed comp8375_c0_seq1_g26	EAPAV[IL]QSHFDK, EE[IL]EAE[IL]QGK, VEDVMP[IL]ATGHER	3	LARRSAIAAGRAPAIAGSAAASTGVLRRAPVFFSTLDAGQARMRVEDVMPIATGHEREEIEAELQGKKRFDMDAPVGPFGTKEAPAVIQSHFDKRIVGCPGAEGEDEHDVVWFWLEKGKPHECPVCTQYFKLEVIGNGGNPDGHDDDDDHHHH	0.996667	1.01	1.04667	1.05333	1.01333	1.04	0.94, 1.1, 0.95	1.03, 1.13, 0.87	1.07, 1.1, 0.97	1.14, 1.0, 1.02	1.1, 1.02, 0.92	1.04, 0.97, 1.11	0.0517472	0.0757188	0.0392994	0.0437163	0.0520683	0.0404145
p8400	TPM=145.18 Putative ortholog: Os02g32350 TUDOR protein with multiple SNc domains, putative, expressed comp655_c0_seq1_g1562	EAPV[IL]GAFNPVK, TA[IL]QN[IL]EQFQEK	2	LPLLQFFSSLLLTRDRDQRSSSSSDQEAEAKPHGDPSRGSGGGSRHAKYIAAIMASNTGASGWLRGKVKAVTSGDCLLIMGSTKAEIPPEKSITLSYLMAPRLARRNGVDEPFAWESREFLRKHCIGKEVTFRVDYTAPNIGREFGTVYLGDKNVAYLVVAAGWARVKEQGPKGGEQSPSLAELQRLEDLAKEQGLGRWSKEPGAAEESIRDLPPSAIGESSGFDAKGFVVENKGKSLEAVVEQVRDGSTVRVYLLPSFQFVQIYVAGVQAPSMGRRPPNPAVVAEADGTAEDTANGEDSVEAPAPLTTAQRLAASAVSTEIPPDSWGRQAKHFTETRVLNRDVRIVVEGTDSFNNIIGSVYYPDGDTAKDLSLELVENGLAKYVEWSANMLDVEIKVK…	1	1.04	0.975	0.985	1.045	0.94	1.08, 0.92	1.05, 1.03	0.95, 1.0	0.88, 1.09	0.97, 1.12	0.91, 0.97	0.08	0.01	0.025	0.105	0.075	0.03
p55593	TPM=209.71 comp1426_c0_seq1_g473	EAQAQ[IL]AQ[IL]ENSR, MAN[IL]VNFS[IL]DSK, QAA[IL]QA[IL]HD[IL][IL]TSK, QEEAP[IL][IL]EEAFQK, RAEE[IL][IL]NVGQK, YGASH[IL]E[IL]ENEK	6	MSTFAKPENALKRAEELINVGQKQAALQALHDLITSKRYRSWQKPLEKIMMKYVELCVDLRKGRFAKDGLIQYRIVCQQVNVSSLEEVIKHFMQLSNEKAEEAKAQAQALEDALDVEDLEADKRPEDLMLSYVSGEKGKDRSDREFVTPWFKFLWETYRTVLEILRNNSKLEGLYAMTAHKAFQFCKQYKRSTEFRRLCEIIRNHLANLNKYRDQRDRPDLTAPESCKLYLDTRVEQLKIATELSLWQEAFRSVEDIHGLMSLVKRTPKPSVLVIYYAKLTEIFWISESHLYHAYAWLKLFNLQKSYNKNITQKDLQLLASSVLLAALSVTPYDNKYGASHLELENEKERGLRMANLVNFSLDSKRENREMASRASLLSELAAKGVISCASQEVKDLYN…	0.916667	0.911667	0.981667	1.07667	0.993333	1.10167	0.93, 0.81, 1.02, 0.9, 0.93, 0.91	0.89, 0.65, 0.9, 1.02, 1.05, 0.96	0.97, 0.98, 0.98, 1.06, 0.93, 0.97	1.04, 1.2, 0.96, 1.19, 1.0, 1.07	0.96, 0.8, 0.88, 1.14, 1.13, 1.05	1.09, 1.5, 1.09, 1.04, 0.88, 1.01	0.0275278	0.0583904	0.0174005	0.040387	0.0561941	0.08569
p12246	TPM=26.13 Putative ortholog: Os07g37750 ATMIN7, putative, expressed comp2708_c0_seq1_g1042	EASD[IL]QPSTGETASAD[IL]HR, TQAAVSPPSQTFGQR	2	DPGLEDGKNSPLFTDILNMVCGCVDNTSSDSTVLQVLKVLLNAVASNRFRVHGEPLLGVIRVCYNIALNSKSPVNQATSKAMLTQMISIVFRRMESEQVSVPAASSAVKDTPSSSTKDVENGEISTDNQDEEKTTLGDALSINRASETSPTSVEELQTLAGGADIKGLEAVLDKAVELEDGKKVSGGIDLDTMNIIQRDALLLFRTLCKMSMKEESDEVATKTRLLSLELLQGLLEGVSDLFAKNFHFIDSVKAYLSYALLRASVSSSQVVFQYASGIFSVLLLRFRESLKGEIGVFFPLIVLRSLDTSDSSLSQKSSVLRMLEKVCKDSQMLADMFVNYDCDLEGPNLFERMVSALSRIAHGSQSVDSTAVAASQTVSVKGSSLQCLVSILKSLVDWE…	1.14	1.015	1.3	1.145	0.885	1.48	1.11, 1.17	0.7, 1.33	1.48, 1.12	1.33, 0.96	0.63, 1.14	2.12, 0.84	0.03	0.315	0.18	0.185	0.255	0.64
p5289	TPM=30.5 TMHMM=1 Putative ortholog: Os01g08400 syntaxin, putative, expressed comp7030_c0_seq1_g4	EASDSAPPAPWATDSATTP[IL]FQR, TSVFDDPT[IL]E[IL]QE[IL]TAVVK	2	LRGSGGGGPLDDSLSAASAQSEFKNRASRIGLGIHQTSQKLARLAKLAKRTSVFDDPTLEIQELTAVVKKDIGALNNAVMDLQVLCNSQNESGNLSKDTTNHSTTVVDNLKNRLMSATKEFKEVLTMRTENMKVHENRRQMFSSSAAKDASNPFMRQRPLVAREASDSAPPAPWATDSATTPLFQRKKTNGDHGASSSSTPAFMQQQQLAVQQDSYMNSRAEALQNVESTIHELSNIFTQLATMVSQQGELAIRIDENMEDTVANVEGAQGQLLKYLNSISSNRWLMMKIFFVLMVFLMIFIFFVA	1.06	0.805	0.915	0.865	0.745	1.265	0.98, 1.14	0.51, 1.1	0.83, 1.0	0.85, 0.88	0.52, 0.97	1.62, 0.91	0.08	0.295	0.085	0.015	0.225	0.355
p90257	TPM=14.07 comp12947_c0_seq2_g976	EATGTASAAEDTGFGDPVQK, VT[IL]HGTDAE[IL]YR	2	APRRAPEPEPLSESEDDFAGGGEVAPTEGISKPLAHVLKELGKRVPESLIKTRVEDNGFALKYIPWHIANKILNVHAPEWSGEVRNIVYSSDGKSVSVVYRVTLHGTDAEIYREATGTASAAEDTGFGDPVQKAEGMAFRRACARLGLGLHLYHEDLS	1.05	1.005	1.11	1.055	0.96	1.105	1.11, 0.99	1.16, 0.85	1.28, 0.94	1.16, 0.95	1.05, 0.87	1.11, 1.1	0.06	0.155	0.17	0.105	0.09	0.005
p7030	TPM=82.23 Putative ortholog: Os03g21790 cupin domain containing protein, expressed comp1970_c0_seq1_g1555	EAV[IL][IL]PPVQEK, G[IL]FV[IL]DK, NRPQF[IL]AGATSV[IL]R, VRPGDVFW[IL]PR, WEEGEGEWQPEEEGK	5	MLLLLLSGSSAMGAPRHRERWEEGEGEWQPEEEGKGGGGEPAAGKGLFVLDKVEKVVDSEGGQVHVVRGQPWPPASFMHIGFITMEPKTLFVPQYMDSNLILFVQRGEVKVGWIHKDELVEKKLKMGDVLHIDAGSTFYMVNTGEGQRLQVICSIDASDSAGFGPYQSFYLGGAGKQGSVLGGFYPTILTTAFNTTYDELARIFTVKSGGPIVFYTNTTESGRGDKKRDAGEKGRENDPWRPVGRGDEDERGNGQWTWSWRKLMGGFIGGAPSNAAEPNKKSDKTVSAPDPYNLFDHDPSFHNDYGWSISIDKHDYEPLGHSDIGVYLVNLTAGSMMAPHVNPRATEYGVVLGGEGDIQVVFPNGTLAMSAKVRPGDVFWIPRYFPFAQVASQTGPFEF…	0.986	1.028	0.894	0.904	1.042	0.882	0.98, 0.97, 0.99, 1.0, 0.99	1.18, 0.92, 0.95, 1.05, 1.04	0.67, 0.89, 0.98, 0.98, 0.95	0.68, 0.91, 0.99, 0.98, 0.96	1.2, 0.95, 0.96, 1.05, 1.05	0.57, 0.96, 1.03, 0.94, 0.91	0.00509902	0.0455412	0.0583609	0.0576715	0.0448776	0.0804612
p8522	TPM=62.32 Putative ortholog: Os07g29630 SNF7 domain containing protein, putative, expressed comp1607_c0_seq1_g215	EAVAEGGDDDEEDMEE[IL]R, V[IL]ASVAGETASQ[IL]PDAAR	2	MEKMKGLLKPRATPQQQLREWQRRLRNECRGLDRQIRDVQREEKSVEKAIREAAKRNDMGSAKVLAKELVRSRRAVNRLYENKAQLNSVSMHLGEIVATSRTVGHLSKSTEVMKIVNGLMKAPELATTMQEFSKEMTKAGVMEEMMNDAVDSALDSEDMEEEIEEEVDKVLASVAGETASQLPDAARTQKVKQASTSKVPEEREAVAEGGDDDEEDMEEIRARLAKFLLVSAYVPKIHFATALGRTYEIEVRIWLMHIFRPQKLTLHPFKRVGRLTSCAATKLAVSRTPYNQ	1.115	0.975	1.175	1.06	0.88	1.21	1.07, 1.16	1.07, 0.88	1.28, 1.07	1.2, 0.92	1.0, 0.76	1.2, 1.22	0.045	0.095	0.105	0.14	0.12	0.01
p7473	TPM=426.18 Putative ortholog: Os01g19770 mitochondrial import inner membrane translocase subunit Tim17, putative, expressed comp339_c0_seq1_g1066	EAYFVTVEG[IL]GGDNTG[IL]DNVK, P[IL]VD[IL]GHP[IL][IL]NR, RP[IL]VD[IL]GHP[IL][IL]NR, T[IL]KEEVASMDR	4	VTSTDSTTTASKQSGGGIEMSRLDARTLKEEVASMDRRPLVDLGHPLLNRVTDSFIRAAGVGAARAVSKEAYFVTVEGLGGDNTGLDNVKRNTHFSSARGDDGQKSLDAVVKSAGKEAIQWGLAAGVYSGVTYGLREARGCHDWKNSAIAGALAGAAVALTGDTGHADHVVHFAITGAALSSAATMLSGIF	1.0425	1.19	1.04	1.0025	1.14	0.885	1.02, 1.14, 1.04, 0.97	1.34, 1.24, 1.18, 1.0	1.09, 1.06, 1.02, 0.99	1.07, 0.94, 0.98, 1.02	1.31, 1.09, 1.13, 1.03	0.82, 0.86, 0.87, 0.99	0.035678	0.0714143	0.0219848	0.0278014	0.0602771	0.0366288
p6304	TPM=13.58 SignalP=yes Putative ortholog: Os11g04740 FAD-binding and arabino-lactone oxidase domains containing protein, putative, expressed comp9962_c0_seq2_g708	ED[IL]PAPAP[IL]EQR, EKDPD[IL]FY[IL]AR, V[IL][IL]QPDS[IL]PA[IL]EDA[IL]AAAHR	3	PHHHLQLIRALSSSSPLPSSDADLRKYAGYALLVLGCGAATYYSFPFPADALHKKAVPFKYAPLPDDLHTVSNWSGTHEVHTRVLLQPDSIPALEDALAAAHRERRRLRPVGSGLSPNGLGLSRAGMVNLALMDKVLHVDAKKKTVTVQAGIRVAELVDALREHGLTLQNFASIREQQVGGIIQVGAHGTGAGLPPIDEQVISMKLVTPAKGTLELSREKDPDLFYLARCGLGGLGVVAEVTLQCVERHQLVEHTFVSNADEIKKNHKKWLSENKHIKYLWIPYTDTVVVVQCNPPSKRKTPKLTSKYGKDEALQHVRDLYRESLKKYRTEAQSKDPAIDQLSFTELRDQLLALDPLDKDHVIRINKAEAEYWKKSEGYRMGWSDEILGFDCGGQQWVS…	1.07667	1.12333	1.02	0.946667	1.05	0.916667	1.16, 1.05, 1.02	1.03, 1.28, 1.06	1.08, 1.05, 0.93	0.93, 1.0, 0.91	0.89, 1.23, 1.03	1.05, 0.82, 0.88	0.0425572	0.0788106	0.0458258	0.0272845	0.0986577	0.0688799
p8652	TPM=99.08 Putative ortholog: Os12g40550 peptidase, putative, expressed comp1535_c0_seq1_g609	EDAVGN[IL]FGR, EG[IL]P[IL]GVVTA[IL]AAPAS[IL]K, Q[IL]DE[IL]ASFSDSPAPSVTR, SV[IL]NAME[IL]AAK, S[IL]EV[IL]MFTSEEPTR, VEFEGNGGHAGAV[IL]MPAR	6	MEEFAGFPASDDPLRVYSDGGAYPLRVDSDGLQRQIDELASFSDSPAPSVTRVLYSDRDVQARRYIKGIMKQLGLVVREDAVGNIFGRWVGSEADLAAVATGSHVDAIPFSGKYDGVVGVLGALEAISVLQRSGFQPKRSLEVIMFTSEEPTRFGISCLGSRLMAGSKELSQSLKGTFDNQNISFVDAADSAGYKIHPEDLHTVFLNQDTYFAFIELHIEQGPILEKEGIPIGVVTAIAAPASIKVEFEGNGGHAGAVLMPARNDAGLAAAELALAVEKHVLESGSIDTVGTVGILQLHPGAINSIPSKSHLEIDIRDIDEKRRNDVIEKVHQSAIDISKIRGVELSEFKIINQDPPALSDKSVINAMEIAAKQLGLEYKLMISRAYHDSLFMARISPM…	1.02	0.976667	1.00333	0.985	0.963333	1.025	1.04, 1.02, 1.05, 0.96, 1.03, 1.02	0.99, 0.99, 1.0, 1.0, 0.95, 0.93	0.96, 1.01, 1.03, 1.11, 0.92, 0.99	0.92, 0.99, 0.98, 1.16, 0.89, 0.97	0.95, 0.98, 0.96, 1.05, 0.92, 0.92	0.97, 1.01, 1.03, 1.11, 0.97, 1.06	0.0129099	0.0120185	0.0265414	0.0383623	0.0197765	0.0221736
p7805	TPM=70.53 Putative ortholog: Os02g07870 ATP synthase, putative, expressed comp1538_c0_seq1_g105	EDD[IL]NE[IL]VQ[IL]VGK, EDY[IL]AQNAFTPYDK, FDSSF[IL]DMR, FEDPAEGEDV[IL]VAK, N[IL][IL]HFNT[IL]ANQAVER, TT[IL]VANTSNMPVAAR, [IL]AADTP[IL][IL]TGQR, [IL]AEMPADSGYPAY[IL]ASR	8	ASQHTLPDRATDPSSSPPFSLYLVISSGTPAGPTTSSPPAAMAHGDRMTTFEESERESEYGYVRKVSGPVVVADGMGGAAMYELVRVGHDSLIGEIIRLEGDSATIQVYEETAGLMVNDPVLRTKKPLSCELGPGILGNIFDGIQRPLKTIAIKSGDVYIPRGVSVPALDKDQLWEFQPNQLGVGDAITNGDLYATVFENTLMKHHVALPPGAMGKISYIAPAGQYSLQDTVLELEFQGIKKEFTMLHTWPVRTPRPVASKLAADTPLLTGQRVLDALFPSVLGGTCAIPGAFGCGKTVISQALSKYSNSDTVVYVGCGERGNEMAEVLMDFPQLTMTLPDGREESVMKRTTLVANTSNMPVAAREASIYTGITIAEYFRDMGYNVSMMADSTSRWAEA…	1.0125	0.97375	1.0075	1	0.97	1.03625	0.98, 1.07, 0.85, 0.99, 1.03, 1.17, 0.97, 1.04	1.02, 0.95, 0.91, 1.02, 0.97, 1.03, 1.0, 0.89	1.12, 1.06, 0.89, 0.92, 0.99, 1.05, 1.07, 0.96	1.14, 0.99, 1.05, 0.93, 0.96, 0.9, 1.1, 0.93	1.04, 0.89, 1.08, 1.04, 0.94, 0.88, 1.03, 0.86	1.1, 1.12, 0.98, 0.9, 1.02, 1.02, 1.07, 1.08	0.032445	0.0187976	0.0283945	0.0309377	0.0307641	0.0254907
p26810	TPM=9.73 Putative ortholog: Os05g41440 cytochrome P450, putative, expressed comp12755_c0_seq1_g952	EDEVTAMVESVHR, [IL]EKEE[IL]YK	2	PGPRAWPVVGNLRQIKPVRCRCFQEWAHRYGPIISVWFGSSLTVVVSTSDLAKAVLKEHDQQLADRPRNRSTQRFSRNGQDLIWADYGPHYIKVRKLCNLELFTQKRLEALRPIREDEVTAMVESVHRASTAGNEGKPLVVRNHLAMVSFNNITRLAFGKRFMNDNGDIDEEGQEFKIIVNNGIKIGASLSVAEYIWYLRWLCPLNEELYNTHNERRDRLTKKIIEEHAKALKESGAKQHFVDALFTLREQYDLSDDTVFGLLWDMITAGMDTTVISVEWAMAELARNPRVQKKLQEELDSVVGRDRVMLETDFQNLPYLLAVVKESLRLHPPTPLMLPHKASTSVKVGGYNIPKGANVMVNVWAIARDPKVWNNPLEFRPERFLEESIDIKGSDFRVL…	1.015	1.075	1.045	1.025	1.06	0.995	1.01, 1.02	0.91, 1.24	1.07, 1.02	1.05, 1.0	0.9, 1.22	1.17, 0.82	0.005	0.165	0.025	0.025	0.16	0.175
p10043	TPM=467.28 Putative ortholog: Os07g08840 thioredoxin, putative, expressed comp116_c0_seq1_g414	EDFDANFAK, YQVEAMPTF[IL]F[IL]K, [IL][IL]E[IL]TSAPASASA	3	MAAEEGCVIACHTKEDFDANFAKGKETGKLVIIDFTASWCGPCRVIAPVFAEYAKKFPGAIFLKVDVDELKDVAEKYQVEAMPTFLFIKDGEKVDTVVGGRKDEIHKKLLELTSAPASASA	0.956667	0.85	0.98	1.02667	0.886667	1.39333	0.98, 0.95, 0.94	1.11, 1.04, 0.4	1.04, 0.99, 0.91	1.07, 1.04, 0.97	1.14, 1.1, 0.42	0.94, 0.95, 2.29	0.0120185	0.225906	0.0378594	0.0296273	0.233619	0.448343
p1034	TPM=82.9 TMHMM=2 SignalP=yes Putative ortholog: Os05g14170 expressed protein comp1383_c0_seq1_g283	EDG[IL]AS[IL]VDVMASE[IL]PVEK, Q[IL][IL][IL]GT[IL]GDQV[IL]A[IL]DK, SGADSVAPGV[IL]S[IL][IL]DSYSGEE[IL]NSQR	3	MAPPPRRLLLALCGFLAAAALATLAVAVYEDQVGLADWHQKYIGKVKQAVYHSQKSGRRRVVVLTEENVIASLDLRSGDIFWRHVIEKNDPVDQLSLSLGKYVVTLSSGGSILRAWNLPDGQMIWETNMQTSTASKSLLHVLSNNKVAKDNLVLVSAGQWIYAVSSIDGVISWGKEFTLDGLEIKQVTQSPENDILYVVGIAGSSKLAVYHLNAKTGEIIKDIQESLPGGLCGEMLLGSDNRLVALDETRSALYIVEFKGESISYNKVQITDFVQDISGAVKLLPLMSNGIIALQSSSTISLLKLQGLNGLEVIHSFDRPAAVSDALTITEKDEAFAVVQHVGSQIEFIVKVTSDASNEIIREKVNIDQHRGSVEKVFLNNYVRTDKSHGFRALVVMED…	1.01	1.08667	0.996667	0.996667	1.08	0.923333	0.96, 1.09, 0.98	0.99, 1.18, 1.09	1.05, 0.96, 0.98	1.1, 0.89, 1.0	1.04, 1.09, 1.11	1.06, 0.81, 0.9	0.0404145	0.0548736	0.0272845	0.0606447	0.0208167	0.0731057
p8868	TPM=251.76 Putative ortholog: Os08g31810 RNA recognition motif containing protein, putative, expressed comp325_c0_seq1_g1019	EDNN[IL]S[IL][IL]EFER, VKEDNN[IL]S[IL][IL]EFER, V[IL]SAKPVAVQPSR	3	MESPLSKVEELRPCSQGYSLLLKVLSAKPVAVQPSRDRQRQQPQMRIAECIVGDDTGVVVFTARNDQVDLMKVGAIVELKNAKVDMYKGSMRLAVDRSGTVKAAESPASELKVKEDNNLSLIEFERITMVM	0.95	1.03	0.993333	1.04667	1.09	0.966667	0.94, 0.93, 0.98	0.98, 1.15, 0.96	0.94, 1.05, 0.99	1.0, 1.13, 1.01	1.05, 1.24, 0.98	0.96, 0.91, 1.03	0.0152753	0.0602771	0.031798	0.0417665	0.0776745	0.034801
p59293	TPM=1091.75 comp168_c0_seq4_g555	EE[IL]WAADKK, VVVPESV[IL]R	2	PSPPPPLVIPRRLLSPEAQLVEMASEAAKVVVPESVLRKRKREELWAADKKEKAVAEKKIAGENRKVIFARAKQYAEEYDAQDKELVQLKREARLKGGFYVSPEAKLLFVVRIRGINAMHPKTKKILQLLRLRQIFNGVFLKVNKATINMLRRVEPYVAY	1	1.085	0.92	0.915	1.075	0.855	1.04, 0.96	1.25, 0.92	1.04, 0.8	0.99, 0.84	1.19, 0.96	0.83, 0.88	0.04	0.165	0.12	0.075	0.115	0.025
p9682	TPM=114.94 Putative ortholog: Os08g06200 stomatin-like protein 2, putative, expressed comp995_c0_seq2_g1112	EEA[IL]P[IL]PDQSA[IL]TK, FDA[IL]STPVNWGVS[IL]VPEK, T[IL]GSG[IL]HG[IL]VP[IL]VDR	3	WKWKWNGGQRHAYITAGNPPFHFHFHFYRGPRNKSPPPLLPSPPPQPTPMATLLRRSAAPARQLLLLPRQLGAARSMSRYYARDEVSRFDALSTPVNWGVSIVPEKKAFVIERFGKYLRTLGSGIHGLVPLVDRIAYVHSLKEEAIPIPDQSAITKDNVSIQIGGVLYVKIVEPYLASYGVENPVFAVIQLAQTTMRSELGKITLDKTFEERDTLNCNIVKAINEAATDWGLKCLRYEIRDISPPLGVKKAMEMQAEAERKKRAQILESEGAMINEANRAKGAAESILSKAEATARGIKMVSESFKTEGAVEAASLRIAEQYIQAFSLLAKNTNTMLLPSDAGNPGSMIAQALQIFKHTNQSNLATRGKQHLALESADADLSSGMLGDILSGDKVPQPS…	0.946667	0.983333	0.973333	1.03	1.03667	0.996667	0.93, 0.96, 0.95	1.08, 1.0, 0.87	1.02, 0.99, 0.91	1.1, 1.03, 0.96	1.16, 1.04, 0.91	0.95, 0.99, 1.05	0.00881917	0.0611919	0.0328295	0.0404145	0.072188	0.0290593
p61805	TPM=114.77 comp2011_c0_seq5_g343	EEEQAVAAHNA[IL]QGR, P[IL][IL]VEYSPVTDFR	2	GRATKSLARTVTDLPGLSKYIATGRRPRAATNAARPLLPPSLSTRRAQLSSDPPPLHRLLVSLTDFIMAEHLASIFGTEKDRVNCPFYFKIGACRHGDRCSRLHNRPTTSPTIVLANMYQRPDMITPGVDAQGQAIAPEKMQEHFEDFYEDIYEELSKFGEVETLNVCDNLADHMIGNVYVQFREEEQAVAAHNALQGRFYSGRPIIVEYSPVTDFREATCRQYEENSCNRGGYCNFMHVKQIGRELRRKLYGGRSRRSHGRSRSPSPQNRRDNRDRGGDFRRDGRDGGGYRGGGGEGGYRVGGDGGYRGGD	1.01	1.015	0.975	0.97	1.015	0.965	1.05, 0.97	0.93, 1.1	0.98, 0.97	0.94, 1.0	0.89, 1.14	1.05, 0.88	0.04	0.085	0.005	0.03	0.125	0.085
p7812	TPM=316.18 Putative ortholog: Os02g03860 mitochondrial ATP synthase precursor, putative, expressed comp356_c0_seq1_g120	EEFKDEVMPDVR, G[IL]FFEVK, NMA[IL][IL]VAEFDK, TY[IL]NT[IL]QE[IL]R, [IL]EEE[IL]EME[IL]AK, [IL]T[IL]DPDDPTAVAGYAQVMR	6	VSGDDLLKGIFFEVKKKFETALSVLKKEKITIDPDDPTAVAGYAQVMRTVRDKAGLLSDSQRIKYTIETFTKGIPDARTYLNTLQEIRKKSGLIDDLGVEALMMEALEKVEKDIKKPLLRSDKKNMALLVAEFDKINKKLGIRKEDLPKIEEELEMEIAKSELSELKKECVEAMEGQLKREEFKDEVMPDVRKLDIRNFL	0.95	1.05	1.01333	1.07167	1.11	0.975	1.01, 0.89, 0.92, 1.03, 0.86, 0.99	1.22, 1.14, 1.05, 0.95, 0.87, 1.07	1.09, 1.06, 0.91, 1.01, 1.01, 1.0	1.07, 1.19, 0.99, 0.98, 1.19, 1.01	1.2, 1.28, 1.15, 0.93, 1.02, 1.08	0.9, 0.93, 0.86, 1.06, 1.16, 0.94	0.0284019	0.0515752	0.0251219	0.039532	0.0516398	0.0460254
p9932	TPM=306.58 Putative ortholog: Os10g35870 cytochrome b5-like Heme/Steroid binding domain containing protein, expressed comp371_c0_seq1_g139	EEPEAEP[IL]PPPVQ[IL]GEVEEED[IL]R, MFYGPGGPYA[IL]FAGK	2	ISPHGHTSPLEIEIREKTRLPLTLPNPSRASRQRAAMAVAELWETLKQAIVAYTGLSPAAFFTAVAVAAALYHVVTGIFAPPPPPRQRPREEPEAEPLPPPVQLGEVEEEDLRQYDGSDPKKPLLMAIKGQIYDVTQSRMFYGPGGPYALFAGKDASRALAKMSFEPQDLNGDLTGLGPFEMDALQDWEYKFMSKYVKVGTIKKAAPAEDAPETNETTTTEAEPEKAPATEDKPREASPEEVATEKEATTDRIGPGDSAGATSLLVFTEVLDITGVAGCTPL	0.965	1.03	1.03	1.065	1.065	1	1.0, 0.93	1.05, 1.01	1.1, 0.96	1.1, 1.03	1.05, 1.08	1.05, 0.95	0.035	0.02	0.07	0.035	0.015	0.05
p12343	TPM=32.58 Putative ortholog: Os01g02020 acetyl-CoA acetyltransferase, cytosolic, putative, expressed comp3922_c0_seq1_g1311	EEQDAYAVQSNEHG[IL]AAR, TP[IL]GA[IL][IL]GS[IL]SS[IL]PATK	2	LVILDRSVGTVSASPTQTSNPSPATRRRRAPAEHIQSSSEDRNNSMAPPASTGASGAPDGLDPRDVCVVGVARTPIGALLGSLSSLPATKLGSVAIQAALRRANVDPALVQEVFMGNVLTANLGQAPARQAALGAGLPNTVPCTTINKVCSSGMKAVMLAAQSIQLGINDVVVAGGMESMSNAPKYLAETRRGSRFGHDVVIDGMLKDGLWDVYNDFHMGMCAELCADQHSISREEQDAYAVQSNEHGIAARDSGAFDWEITPVEVPSGRGRPPVIVDKDESLAKYDPVKLRKLGPAFKKTGSVTAGNSSSISDGAAAIVLVSGEKAKNLGLQVLARIRGYADAAQAPELFTTTPALAIPKAISNSGLQTSQIDYYEINEAFSVVAVANQRLLRIPPGK…	0.92	0.93	0.96	1.04	1.01	1.045	0.93, 0.91	0.84, 1.02	1.0, 0.92	1.07, 1.01	0.9, 1.12	1.19, 0.9	0.01	0.09	0.04	0.03	0.11	0.145
p59570	TPM=114.94 comp995_c0_seq1_g1115	EET[IL]P[IL]PEQSA[IL]TK, T[IL]SSG[IL]H[IL][IL]VPGVDR, YDPSNTPVN[IL]G[IL]S[IL]VPEK	3	MSAATRTMLHARRSAAGLLRPRPGPNPALQLLLQGQGSRSASTSSAGAAAASYNSRDDPSRYDPSNTPVNLGLSIVPEKKAFVVERFGKYLKTLSSGIHLLVPGVDRIAYVHSLKEETIPIPEQSAITKDNVSIQIGGVLYVKIVEPYLASYGVENPVFAVIQLAQTTMRSELGKITLDKTFEERDTLNCNIVKAINEAATDWGLKCLRYEIRDISPPLGVKKAMEMQAEAERKKRAQILESEGAMINEANRAKGAAESILSKAEATARGIKMVSESFKTEGAVEAASLRIAEQYIQAFSLLAKNTNTMLLPSDAGNPGSMIAQALQIFKHTNQSNLATRGKQHLALESADADLSSGMLGDILSGDKVPQPSQK	0.983333	0.9	0.92	0.94	0.92	1.02667	0.94, 0.99, 1.02	0.98, 0.83, 0.89	0.95, 0.89, 0.92	1.02, 0.9, 0.9	1.04, 0.84, 0.88	0.98, 1.07, 1.03	0.0233333	0.043589	0.0173205	0.04	0.061101	0.0260342
p7514	TPM=119.29 Putative ortholog: Os02g07760 aldehyde dehydrogenase, putative, expressed comp910_c1_seq1_g1162	EEVFGPVAP[IL][IL]PFK, ETSDA[IL]ASANTTFYSWSK, VYGDV[IL]PPT[IL]ADR, WVDAYDGK, [IL]TFTGSTAVGK, [IL][IL]VQEG[IL]YEK	6	RPDSSSPSPALPDVDDDATRGGARRPPHPRLLGGLLAPHQPPPREQMGSVNAAAAMEKIRAAGLLRTQGLIGGKWVDAYDGKTLEVQNPATGEVLANVACMGNRETSDAIASANTTFYSWSKLTASERSKALRKWHDLLISHKEELALLMTLEQGKPMKEALGEVNYGASFIEYFAEEAKRVYGDVIPPTLADRRILVLKQPIGVVGAITPWNFPLAMITRKVGPALACGCTVVVKPSEFTPLTALAAADLALQAGIPAGALNVVMGNAPEIGDALTQSTQVRKITFTGSTAVGKKLMAGSANTVKKVSLELGGNAPCIVFDDADIEVAVKGSLAAKFRNSGQTCVCANRILVQEGIYEKFASAFVKAVQSLQVGNGLEESTSQGPLINEAAVQKVEKF…	0.915	0.971667	0.983333	1.1	1.06	1.04833	1.05, 0.99, 0.94, 0.63, 0.92, 0.96	1.18, 1.05, 0.97, 0.62, 1.06, 0.95	0.98, 1.0, 1.1, 0.94, 1.01, 0.87	0.93, 1.01, 1.17, 1.48, 1.1, 0.91	1.13, 1.06, 1.04, 0.98, 1.15, 1.0	0.83, 0.96, 1.13, 1.51, 0.95, 0.91	0.0599305	0.0777782	0.0312694	0.0861007	0.0279285	0.100678
p7579	TPM=874.21 Putative ortholog: Os06g35970 meiosis 5, putative, expressed comp186_c0_seq1_g1279	EGAAAY[IL]NSVAAK, FAYTGYEVK, TDYYGD[IL][IL]R	3	GSGGGYGGGGSGGGYGGGGSGGGYGGGGGGYTPTPTPTVPSHTGSCDYWKSHPEKIIDCLGNLGSILGSLGEVCKTFYGSKMDTLKDALCNTRTDYYGDLLREGAAAYINSVAAKKTKFAYTGYEVKECIAVGLTSEFAAAAQAAALKKANDACHY	1.03333	0.923333	0.91	0.886667	0.9	1.02667	0.98, 1.08, 1.04	1.1, 0.77, 0.9	0.77, 0.98, 0.98	0.79, 0.92, 0.95	1.12, 0.71, 0.87	0.7, 1.28, 1.1	0.0290593	0.0959745	0.07	0.0491031	0.119304	0.171399
p58011	TPM=998.93 comp121_c0_seq2_g1621	EGATDPTF[IL]YFAHG[IL]K, E[IL]ENG[IL][IL]WEVDGK, VVD[IL]VDTFR, Y[IL][IL]GM[IL]K, [IL]SGDEM[IL]SDSFPYK	5	MLLYTDKISGDEMLSDSFPYKELENGLLWEVDGKWVVKGAVDVDIGANPSAEGGGDDEGTDDQAVKVVDIVDTFRLQEQPPYDKKQFVAYMKGYIKSISKTLEGEELDCFMKNVQPATKYLLGMIKELQFFVGDSMNLEAGLVFAYYKEGATDPTFLYFAHGLKEVKC	0.93	1.022	0.91	0.978	1.1	0.89	1.01, 0.99, 0.88, 0.83, 0.94	1.11, 1.05, 0.94, 0.93, 1.08	0.97, 0.92, 0.87, 0.82, 0.97	0.96, 0.93, 0.98, 0.99, 1.03	1.1, 1.06, 1.06, 1.13, 1.15	0.88, 0.87, 0.92, 0.88, 0.9	0.0336155	0.0367967	0.0291548	0.0165529	0.0181659	0.00894427
p7789	TPM=154.62 Putative ortholog: Os07g44730 expressed protein comp279_c0_seq1_g68	EGDHV[IL][IL]PEYGG[IL]EVK, END[IL][IL]GT[IL]SD, KSAGG[IL][IL][IL]PETSK	3	MAAIKRLLPSFNRVLVEKIVLPKKSAGGILLPETSKQLNSGKVVAVGPGERDRDGKLIPVCLKEGDHVLLPEYGGLEVKLAPEKEYLLFRENDILGTLSD	0.966667	1.08	0.93	0.963333	1.12333	0.866667	1.01, 0.91, 0.98	0.98, 1.06, 1.2	1.01, 0.89, 0.89	0.99, 0.99, 0.91	0.97, 1.17, 1.23	1.02, 0.84, 0.74	0.0296273	0.064291	0.04	0.0266667	0.0785988	0.0819214
p8633	TPM=101.1 Putative ortholog: Os03g25050 chaperonin, putative, expressed comp1785_c0_seq1_g537	EGDTV[IL][IL]PGYGGTEVK, EY[IL][IL]FGEHD[IL][IL]GR, TAAG[IL][IL][IL]PETTK	3	LRPAVKEQRDCPLTTINLFLKKKRRAAMAKRLIPSLNRVLVEKVLQPNKTAAGILLPETTKQLNSAKVIAVGPGVHDRDGKLIPVSLKEGDTVLLPGYGGTEVKLAEKEYLLFGEHDILGRLEE	0.936667	0.96	0.956667	1.02667	1.03	0.996667	0.94, 0.97, 0.9	0.92, 0.96, 1.0	0.95, 0.97, 0.95	1.02, 1.0, 1.06	0.99, 0.99, 1.11	1.03, 1.01, 0.95	0.0202759	0.023094	0.00666667	0.0176383	0.04	0.024037
p65427	TPM=57.09 comp2936_c0_seq1_g1133	EGFDWDNFDWEK, YDA[IL]QAQ[IL]TE[IL]QTK	2	MSLRRLAGGDSPLSRLRPLAVEFLAGSDSYLVSFRPLSSAPLARQTGAGYSPRHRDALAGRSWEGIKPDQAMIDHWGTRGLASLPSSGGGGGKEKSSGDSEGDGSTGSKNSGGASGSGKEGFDWDNFDWEKFKRYYKIAEGVRSFLKLISTAAVVVGTGSAYVLKKVDKRVDEQVEAKVKVERTLRELFEKNAVIGHYEFMHKTNTRYDALQAQLTELQTKGNDLWMKSRENQMMCEDVRRLVIAMMSELHKKESSPTEVMKNDMQTPPEDAAK	0.925	1.015	0.995	1.07	1.1	0.97	0.94, 0.91	1.01, 1.02	0.96, 1.03	1.02, 1.12	1.08, 1.12	0.94, 1.0	0.015	0.005	0.035	0.05	0.02	0.03
p12846	TPM=96.35 Putative ortholog: Os11g01420 ribosomal protein L10, putative, expressed comp2058_c0_seq1_g1021	EGP[IL]EQFSHEMEPF[IL]R, TGS[IL]ATETVE[IL]K	2	MPKSKRNRAVTLSKTKKKPGLERKGKVVTEIKDAIERHSSAYVFTYNNMRNQKLKDLRDQLKSSSRIFLAGKKVMQIALGRSPADEAKTGLHKLSKYLQGNTGLLFTNLPRDDVERLFREFEGLDFARTGSIATETVELKEGPLEQFSHEMEPFIRKQGLPVRLNKGVVELIADHVVCEEGKPLSPEAAHTLRLLGVQMATFRLYLVCRWSSDDFEVYKEGLAQLTAGDADESS	0.95	0.965	0.995	1.055	1.015	1.04	0.9, 1.0	0.91, 1.02	1.0, 0.99	1.12, 0.99	1.01, 1.02	1.11, 0.97	0.05	0.055	0.005	0.065	0.005	0.07
p58601	TPM=179.52 comp470_c0_seq1_g978	EKPAV[IL]GQ[IL][IL]K, FST[IL][IL]ATDVAAR, NPVVVD[IL]VGEDDQK	3	PRSVAIAVSLDPSPSSSPSSHRIAKEEVLEIAKLGISPEIVSKLAGKGITKLFPIQKAVLEPAMQGKDMVGRAKTGTGKTLAFGIPIMDAIIRHNKANGPGQFPLAICLAPTRELAKQVEKEFVDSSNLATLCVYGGSPIQQQIRALAGGVDIVVGTPGRVIDLLKRGTLNLSMVQFVVLDEADQMLSVGFDEAVEVILQKVPVKRQTLMFSATMPPWIRKLTAKYLKNPVVVDLVGEDDQKLAEGITLFTIATEKREKPAVLGQLIKDHAKGGKCIVFTQTKRDADNLAYAMGRSIQCQALHGDITQAQRERTLQGFREGRFSTLIATDVAARGLDIPNVDLVIHFELPNNSEIFVHRTGRTGRAGKKGTAIVMHTYNESRAVRGIENDVGGKFNELP…	1.08	1.08	1.03333	0.96	1.01	0.96	0.98, 1.09, 1.17	1.1, 0.92, 1.22	1.02, 0.92, 1.16	1.05, 0.84, 0.99	1.13, 0.85, 1.05	0.93, 1.0, 0.95	0.0550757	0.087178	0.069602	0.06245	0.0832666	0.0208167
p6873	TPM=125.17 Putative ortholog: Os02g37870 Brix domain containing protein, putative, expressed comp1006_c0_seq1_g1270	EM[IL]TQ[IL]FATPK, GGQ[IL]NE[IL]VE[IL]R	2	MAKKRKRSSDAPASAAAEKPDDSAPERPARTLFGFKDKPDSAAVEPASKDGAPFRNKEKVLVTCSRRIIYRYRHLMQNVVSLLPHAKKDSKVESKQSKGGQLNELVELRSCSSCLFFECRKQKDLYLWMVKSPAGPSVKFLVNAVHTMEELKLTGNHLKGSRPLLTFSSNFDQQPHWKLLKEMITQIFATPKDHRKAKPFHDHVFVFSIVDDHIWFRNYQISVPHNEIDKVDKGGLDKMTLVEVGPRFCLNPIKIFGGSFGGPTLYENPFYVSPNQIRALEKRKKAGKYAHKVKAKVRRREHEKVHHLEPDEFADIWKGED	1.005	1	1.02	1.01	1	1.01	0.99, 1.02	0.98, 1.02	0.96, 1.08	0.96, 1.06	0.99, 1.01	0.97, 1.05	0.015	0.02	0.06	0.05	0.01	0.04
p14513	TPM=33.86 Putative ortholog: Os04g54410 expressed protein comp4211_c0_seq1_g1078	EMNAAESPAAVEQPTPAEEK, K[IL]VEE[IL]QQK, MEEVA[IL][IL]DK, S[IL]AETY[IL][IL]QEEPG[IL]TK, [IL]A[IL]GT[IL]A[IL]EEA[IL]SSGSP[IL]R, [IL]KEDQSGDG[IL]ES[IL][IL]SR	6	MLRRSVRDLYSLRSRTRIPRPISSEVQSPTFLQSRRNSTKASQQSSAQNPVPKPQEEPPQSGSKVSKLLLGTVVVGAAAVAAHQAGYIDLQFKDKKLPSTIRDQNFTKMYENLKSPFEQKVDQKQTMSVPNNDIAQETPKDLRTKEMNAAESPAAVEQPTPAEEKETETLTQVQDKHESDAKLPSQDTLSFHTKPNVVNDKAASEVAPGQSDKIDSTVSHLQSSPSMAGPSHDSHADTDAPKDPFAADAGEQKSLAETYLLQEEPGITKDVSAKETRSDGVVDGVKASDDGKIMLDVIEAIHAAEKKQADADAYKYSEEKRKLKEKYETQLKDTRARELMRMEEVAILDKELKKEKDKAAAAIKELKEKSEKKLVEELQQKDEEASQEVEKVKELAKAE…	1.00333	1.165	0.991667	0.986667	1.16	0.858333	1.06, 1.12, 0.93, 0.95, 0.94, 1.02	1.33, 1.37, 1.02, 1.07, 1.13, 1.07	1.02, 1.1, 0.95, 0.95, 0.94, 0.99	0.96, 0.98, 1.02, 1.0, 0.99, 0.97	1.26, 1.22, 1.1, 1.12, 1.2, 1.06	0.77, 0.81, 0.93, 0.89, 0.83, 0.92	0.0312694	0.060429	0.0249555	0.00881917	0.0318329	0.0263839
p14114	TPM=61.57 Putative ortholog: Os04g31190 dynamin family protein, putative, expressed comp2752_c1_seq1_g1311	EN[IL][IL]DEM[IL]R, [IL]QET[IL]QV[IL]EQAHR	2	VGSSVIPIVNKLQDIFAQLGSNSTIDLPQVAVVGSQSSGKSSVLEALVGRDFLPRGSDICTRRPLVLQLVHQPLRPSGVDADEWGEFLHQPGRRYSDFREIRREIQAETDREAGGNKGVSDRQIRLKIHSPNVLNITLVDLPGITKVPVGDQPTDIEARIRTMILSYIKHKTCIILAVSPANADLANSDALQMARQADPDGSRTIGVITKLDIMDRGTDARNFLLGNVIPLRLGYVGVVNRCQQDIISDLSIKDALAREEKFFRNQPAYNGLAQYCGIPQLAKKLNQILVQHIKTILPGLKSRISSQLTAIAKEHAFYGDPVESKAGQGAKLLNILAKYCDAFSSMVEGKNEDISTIELSGGARIHYIFQSIFVKSLEEVDPCKNISDEDIRTSIQNSG…	1.035	1.065	1.045	1.015	1.03	0.99	1.03, 1.04	1.13, 1.0	1.02, 1.07	1.0, 1.03	1.1, 0.96	0.91, 1.07	0.005	0.065	0.025	0.015	0.07	0.08
p8410	TPM=59.84 Putative ortholog: Os07g03230 eukaryotic translation initiation factor 3 subunit C, putative, expressed comp1590_c0_seq1_g1596	ENPASFEDVVDEK, E[IL][IL]AQGVQYSR, WQENFVSSQGR, [IL]QDGVQ[IL]MD[IL]SSQ[IL][IL]FNR	4	MASRFWGQGDSDSEEEVDDIESEQGSDDEKSETGDGARDGNKNRYLSKYTQDSDESDTESHRVIRSLKDKRNDEMKATADQMRNAMKINDWLSLQESFDKLNKQLEKVVRVNESAKIPNGYITTLVLLEDFLAEALANKEAKKKMSSSNAKALNAMKQKLKKNNKQYEDLILKCRENPASFEDVVDEKNVDDSDDEDDDGSGEDLVDPDKMDGSESDESGKENGEGEEGGGWEKKLSKKDKVMDKQFLKDPSEITWDIVDNKLKEIVASRGKKGTGRVERVEQLTFLTKVAKTPAQKLEILFHVISAQFDVNPSLLGHMPVSVWKKCVNNLLLVLDILQRYPNIVVNTSVEPDEKETQKGADYDGTIHVTGDLVAFLERIDSDFFKSLQGSDPYTKDYV…	0.9625	0.9525	1.005	1.0475	0.9975	1.06	0.91, 1.15, 0.83, 0.96	1.0, 1.03, 0.86, 0.92	0.95, 1.04, 0.93, 1.1	1.04, 0.9, 1.11, 1.14	1.1, 0.9, 1.03, 0.96	0.95, 1.01, 1.08, 1.2	0.067992	0.0385951	0.0396863	0.0534439	0.0432772	0.0536967
p9354	TPM=1091.75 Putative ortholog: Os04g51630 60S ribosomal protein L7, putative, expressed comp168_c0_seq2_g559	ENY[IL]NQ[IL]VR, RVEPYVAYGYPN[IL]K, VEPYVAYGYPN[IL]K, VVPESF[IL]K, [IL]KAP[IL]GG[IL]K	5	TRRRLSLVPPLSLSRLLLLQGSSLVKMSAEAAKVVPESFLKKTKRAEGWAAEAKTKAVEEKKKSTENRKVIFARAKQYAEEYDAQEKELVQLKREARLKGGFYVSPEAKLLFVVRIRGINAMHPKTKKILQLLRLRQIFNGVFLKVNKATINMLRRVEPYVAYGYPNLKSVRELIYKRGYGKLNKQRIPLSNNKVIEEGLGKHNIICIEDLVHEILSVGPHFKEANNFLWPFKLKAPLGGLKKKRNHYVEGGDAGNRENYINQLVRRMN	0.946	1.064	1.008	1.078	1.132	0.954	0.97, 1.03, 0.81, 0.83, 1.09	0.96, 1.04, 1.01, 1.07, 1.24	0.92, 1.05, 1.12, 0.91, 1.04	0.94, 1.02, 1.38, 1.1, 0.95	0.99, 1.0, 1.24, 1.29, 1.14	0.96, 1.02, 1.11, 0.85, 0.83	0.0549181	0.0476025	0.0404228	0.0807713	0.0609426	0.0524023
p51144	TPM=39.06 TMHMM=1 SignalP=yes comp5311_c0_seq1_g17	EP[IL][IL]EQVTSA[IL]VNR, KGYVVNAEDVK	2	RHGFSRAASVVVLIRIRDRDDRPLPFLLLLLATLLAAAPLSPAAEPEAFDVRRHLSTVTRYDVSRGSNNAVAAPSISDECRVIHLNLVARHGTRAPTKKRVKELDRLALRLGALVNEARQGPDSEAVKKIPSWMNTWESPWKGKVTGKGGELVSEGEEELFNFANRVKERFQDLFDEEYHPEVFSIRATQVPRASASAVAFGLGLLSGKGKLGAGKNRAFSVLSESRASDICLRFFDSCQTYKDYRKRKEPDVDKQKEPILEQVTSALVNRYHLNFTKQDVSSLWFLCKQEASLLNITNHACQLFSEAEVKSLEWTDDLEGFVLKGYGESINYKMGLPLLKDVVQSMEDAITAKEENYPDGTYEKARLRFAHAETLVPFTCLLGLFLEGSDFEKIQREE…	1.26	1.39	1.07	0.85	1.095	0.775	1.19, 1.33	1.28, 1.5	1.02, 1.12	0.86, 0.84	1.07, 1.12	0.8, 0.75	0.07	0.11	0.05	0.01	0.025	0.025
p23183	TPM=9.67 Putative ortholog: Os02g52040 phosphate-induced protein 1 conserved region domain containing protein, expressed comp9973_c0_seq1_g621	EPD[IL][IL]A[IL]AAR, GAYPGFPGE[IL][IL]VDPATGASYNANGAR	2	YHHHHLCFAPLYKTPAHSPPPKHTRSISTQDNQQSPTGTPQHRPAMASTFSSTAASLLVCAMLLQTCLATRRLTALVQDPPMTMEYHKGALLTGRIAINLVWYGDFTAAQRAALTDFLSSLSSTTPQQPSPSVATWFTTAHKYYAASKTPFPTLSINAHVLDTSYSLGKHLKEPDLLALAARGGRRRAINVVLTAPDVAVAGFCSSRCGSHGASPRSRAGRFAYVWVGNPAAQCPGQCAWPFHQPQYGPQTAPLSPPNGDVGVDGMVVSLASMLVGAVTNPFGNGFFQGPKEAPLEAATACAGVYGKGAYPGFPGELLVDPATGASYNANGARGRKYLVPALVDPDTSACSTLG	0.985	0.89	0.92	0.94	0.91	1.04	0.97, 1.0	1.01, 0.77	1.0, 0.84	1.03, 0.85	1.04, 0.78	0.99, 1.09	0.015	0.12	0.08	0.09	0.13	0.05
p6363	TPM=141.1 Putative ortholog: Os05g08840 DnaK family protein, putative, expressed comp1495_c0_seq2_g88	EQPAAEEMDTDKPDGSTDPSSA, VTEGADGFP[IL]VHAR	2	YHGAAPYIPPPTASSPSSSPRDTKLSCGGYHNHSSPSFPAPRTAGAVRDLDLGTSRHRDTKKGASEMSVVGFDLGNESCIVGVARQRGIDVVLNEESKRETPAIVCFGDKQRFIGTAGAANSTMNPKNSISQIKRLLGRKFADPELQRDVQSFPFRVTEGADGFPLVHARYLGEERSFTPTQLLAMVLSNLKAIAEGNLNSAVNDCCIGIPVYFTDLQRRAVIDAATIAGLRPLRLFHETTATALAYGIYKTDLPESDQLNVAFVDVGHASMQVSIVGYKKGQLKMLSHSYDRSLGGRDFDEALFKHFAAKFKEEYKIDVYQNARACIRLRVACEKLKKMLSANPEAPMNIECLMDEKDVRGFIKRDEFEHISAPVLERVKGPLEKALVEAGLTTEDVH…	0.815	1.065	0.93	1.165	1.365	0.88	0.66, 0.97	1.12, 1.01	0.85, 1.01	1.29, 1.04	1.69, 1.04	0.76, 1.0	0.155	0.055	0.08	0.125	0.325	0.12
p8204	TPM=3196.55 Putative ortholog: Os11g08445 DnaK family protein, putative, expressed comp34_c1_seq2_g982	EQVFSTYSDNQPGV[IL][IL]QVYEGER, FEEMNMD[IL]FR	2	VRGDSSHHPNSKSQSTQIASVPIHPTKAERSRPAASESGEMGKGEGPAIGIDLGTTYSCVGVWQHDRVEIIANDQGNRTTPSYVAFTDSERLIGDAAKNQVAMNPINTVFDAKRLIGRRFTDPTVQSDIKLWPFKVVAGPADKPMINVQYKGEEKQFAAEEISSMVLIKMREIAEAFLGSTVKNAVVTVPAYFNDSQRQATKDAGVIAGINVLRIINEPTAAAIAYGLDKKATSVGEKNVLIFDLGGGTFDVSLLTIEEGIFEVKATAGDTHLGGEDFDNRMVNHFVQEFKRKNKKDISGNPRALRRLRTSCERAKRTLSSTAQTTIEIDSLFEGIDFYSTITRARFEEMNMDLFRKCMEPVEKCLRDAKMDKSSVHDVVLVGGSTRIPKVQQLLQDFF…	0.95	0.905	1.025	1.085	0.95	1.135	0.92, 0.98	0.92, 0.89	1.18, 0.87	1.28, 0.89	1.0, 0.9	1.29, 0.98	0.03	0.015	0.155	0.195	0.05	0.155
p6863	TPM=125.1 Putative ortholog: Os02g11840 coatomer subunit beta-2, putative, expressed comp955_c0_seq2_g1241	EQYDSVAHF[IL]ESR, G[IL]YPPAEEYT[IL]HAER	2	MPLRLDIKRKLAQRSERVKSVDLHPTEPWILSSLYSGSVCIWNYQTQTMVKSFEVTDLPVRSAKFIARKQWVVAGADDMFIRVYNYNTMDKVKVFEAHTDYIRCVAVHPTQPFVLSSSDDMLIKLWDWDKGWACTHIFEGHSHYVMQVTFNPKDTNTFASASLDRTIKIWSIGSPDPNFTLDGHSKGVNCVDYFTGGDRPFLITGSDDQTAKLWDYQTKSCVQTLEGHAHNVSAVCFHPELPIIITGSEDGTVRLWHSTTYRLENTLNYGLERVWALGYMKGSRRIVIGYDEGTIMIKIGREVPVASMDNSGKIIWAKHNEIQTVNIKTVGAGNEIADGERLPLAVKELGSCDLYPQNLKHNPNGRFVVVCGDGEYIIYTALAWRNRSFGSALEFAWSS…	0.995	0.885	1.01	1.015	0.895	1.14	0.96, 1.03	0.9, 0.87	1.02, 1.0	1.06, 0.97	0.94, 0.85	1.13, 1.15	0.035	0.015	0.01	0.045	0.045	0.01
p6016	TPM=15.98 TMHMM=2 Putative ortholog: Os01g07382 expressed protein comp9003_c0_seq1_g1189	EREEAEEEEAEA[IL]R, [IL]NTSAA[IL][IL]EVMGAP[IL]AGTDVR	2	TPIPRHFPSPSRFFTTARPEARLPRPTLLAPPRLPQAMQRLVGGVRQFASGGAGRSTKPVPLGQGLNRPVVAAKNAAARYREAVGLQVEAFWRRNYMLLVGAGGVVVCIALWRVMFGIASTFVGLSEGMAKYGFLALATAMVAFAGMYARARITINPDKVYRIAMTKLNTSAAILEVMGAPLAGTDVRAYVMSGGGPKLKDFKLKVGGKRCFLIFPIKGSERKGLVSVEVKKKKGQYDMKLLAVDIPMASGPDQRLFLVGDEQEYKVGGGLISELRDPIVKAMAAEKEFDYLDEREDAEDERREREEAEEEEAEALRREEDRLREEAKERQRREAENLEKAS	0.95	0.875	0.88	0.925	0.92	1.005	0.94, 0.96	0.96, 0.79	0.95, 0.81	1.01, 0.84	1.02, 0.82	0.99, 1.02	0.01	0.085	0.07	0.085	0.1	0.015
p57619	TPM=866.14 comp306_c0_seq2_g927	ESA[IL]GN[IL]PT[IL]AFCDTDSPMR, FAQYTGANA[IL]AGR, HTPGTFTNQMQTSFSEPR	3	WWCSLPSLPSPWSLRAAAPPLPPPPRGASESPSTMAAAAGQAPAELSQRELDTQMLLAADAHLGTKNCNFQMERYVYKRRTDGIYIINLGKTWEKLQLAARVIVAIENPQDIIVQSARPYGQRAVLKFAQYTGANAIAGRHTPGTFTNQMQTSFSEPRLLILTDPRTDHQPIKESALGNIPTIAFCDTDSPMRYVDIGIPANNKGRNSIGCLFWLLARMVLQMRGTILPGRKWDVMVDLFFYRDPEEAKDLEEEDALVAPEYGAVAEYAAPTGDTWGAEWPGAAAPAPAVEGQAGAEWTAAAPVAESGWDAVTAPAPTGWEQGSAPAPAAAAPTPNWE	1.10667	1.1	0.983333	0.9	0.986667	0.926667	1.29, 1.08, 0.95	1.48, 0.92, 0.9	1.09, 0.94, 0.92	0.84, 0.88, 0.98	1.15, 0.86, 0.95	0.73, 1.02, 1.03	0.0990511	0.190088	0.0536449	0.0416333	0.0856997	0.0983757
p48142	TPM=57.17 TMHMM=2 SignalP=yes comp3128_c0_seq1_g108	ESPMPDESE[IL]FK, GGT[IL]VAAFAE[IL]MGR, NVYVNDCG[IL]ESFGVDR	3	ITAYRDHCLYLARGGTLVAAFAELMGRVDGCSRGKGGSMHFYKKDAGFFGGHGIVGAQVPLGCGLAFAQRYRKEGTVTFDLYGDGAANQGQLFEALNMAALWKLPVILVCENNHYGMGTAEWRASKSAAYYTRGDYVPGLKVDGMDFLAVKQACKFAKEHVLQNGPIILEMDTYRYHGHSMSDPGSTYRTRDEIAGIRQERDPIERVRKLILAHDLATAQELKDMEKEIRKEVDTAIAKAKESPMPDESELFKNVYVNDCGLESFGVDRKVVRTVLP	1.16333	1.27333	1.08333	0.936667	1.09333	0.86	1.0, 1.03, 1.46	1.11, 1.07, 1.64	0.9, 1.06, 1.29	0.9, 1.03, 0.88	1.11, 1.05, 1.12	0.81, 0.98, 0.79	0.148586	0.183697	0.113186	0.0470225	0.0218581	0.0602771
p9962	TPM=89.86 Putative ortholog: Os02g01450 expressed protein comp1946_c0_seq1_g221	ET[IL][IL]SG[IL]QAEVNHMR, Q[IL]SD[IL]ENQAVG[IL]K	2	MTDAPPAPAGGSPPPPQPESGGSISSMVASSASSAAAAAADFTRRGEALGADMAAAARNAFDTGTAHAHSSAIAASDAASAAMAEALAAFPTLTHAAKQEFEWVKNEYLAREQMALGKIKEGVIMAIEHPGIAAGSTAVAGIVLFKRPRSYLIQRVRRIFVSKETLLSGIQAEVNHMRQTVNLVSNESQKLMDRAATAERRFQKGWNTLREEGRAIQSELKQISDIENQAVGLKGVLDQLPRAHASEFRSEISGLASQVKKDKRVLNSALTKIVNYGVPI	1.05	1.13	1.075	1.025	1.08	0.96	1.12, 0.98	1.08, 1.18	1.14, 1.01	1.02, 1.03	0.96, 1.2	1.06, 0.86	0.07	0.05	0.065	0.005	0.12	0.1
p57174	TPM=66.43 comp1477_c0_seq2_g131	ET[IL][IL]WEATGSP[IL][IL]P[IL]SEFSEPS[IL]PK, TGDS[IL][IL][IL][IL]HVVK	2	MATEGERWVGLAVDFSEGSRAALKWAADNLLRTGDSLLLLHVVKDPDYEQRETILWEATGSPLIPLSEFSEPSIPKKYGVKPDAETLDMLNTIAKQKEVTVVSKVLFGDPREKLCQAIHDIPMSCLVIGSRGLGKLKRVLLGSVSDYVVNNAACPVTVVKPPTTHT	0.96	1.15	1.025	1.07	1.205	0.895	0.93, 0.99	1.23, 1.07	1.06, 0.99	1.14, 1.0	1.33, 1.08	0.86, 0.93	0.03	0.08	0.035	0.07	0.125	0.035
p5434	TPM=27.33 TMHMM=1 SignalP=yes Putative ortholog: Os03g26490 expressed protein comp7421_c0_seq1_g163	ETAEQAGAAVAGAAEDAVGMAK, YDGGG[IL]AGSAAEAAK	2	MSDARDTAAASVDDNNRHGGSGAEAPPAAKGGATISITIVLLVLLVASIAAFLMSPPPGGKLPAPMEEPGSRYGSEPVEHAVGAHGTPGFNSRLDAFRTWAKLTWMKLQRPRSDEPRYDGGGIAGSAAEAAKKSMEMGKETAEQAGAAVAGAAEDAVGMAKDTAKA	1.09	1.15	1.015	0.93	1.05	0.885	1.15, 1.03	1.23, 1.07	1.09, 0.94	0.95, 0.91	1.07, 1.03	0.89, 0.88	0.06	0.08	0.075	0.02	0.02	0.005
p45370	TPM=83.18 TMHMM=1 comp2094_c0_seq1_g160	ETCEN[IL]PNE, TTDVSSVGTD[IL][IL]ER	2	MRETLSLKRERKRRGGATTSLDLEGWPVCCCAGPPSTVRSSLEELDALCELVRTTDVSSVGTDLLERIVECCSNARKEFVQKEMRKTWMIGAATVGGFFVGCLTRTRNIDNKRKGELTKETCENLPNE	1.21	0.855	0.92	0.79	0.735	1.08	1.37, 1.05	0.72, 0.99	0.77, 1.07	0.56, 1.02	0.53, 0.94	1.07, 1.09	0.16	0.135	0.15	0.23	0.205	0.01
p21507	TPM=32.11 Putative ortholog: Os01g61410 NADH-ubiquinone oxidoreductase, mitochondrial precursor, putative, expressed comp8442_c0_seq2_g80	EV[IL]PA[IL]AQVAER, [IL]QPAVSSSPGSYF[IL][IL]AR	2	MAWSRIARGSQLSQSLSRIVSEGGAAPTPAASALRNAAALGHHAPRTTSSSFHSLASAALADKYCGAAAHLHHHRHHPTRGISTTPAKQLPASAADALPAEPSDATAASSALPDLGPTKPGEKPRVVVLGTGWASCRFLKDVDTSAYDVVCVSPRNHMVFTPLLASTCVGTLEFRSVAEPLARIQPAVSSSPGSYFLLARCTGVDPDAHTIECETVTEGEKDTLEPWKFKVSYDKLVFGCGAEASTFGIKGVTEHATFLREVHHAQEIRRKLLLNLMLSDVPGISEKEKRRLLHCVVVGGGPTGVEFSGELSDFITRDVKQRYAHVKDYVHVTLIEANEILSSFDVRLRQYAINQLVKSGVKLVRGIVKDVQPDKLILDNGEEVPYGLLVWSTGVGASS…	0.985	0.92	0.965	0.985	0.94	1.05	1.09, 0.88	0.98, 0.86	0.99, 0.94	0.91, 1.06	0.9, 0.98	1.01, 1.09	0.105	0.06	0.025	0.075	0.04	0.04
p98825	TPM=9.45 comp15433_c0_seq1_g1052	EV[IL]S[IL]CDHPA[IL][IL]DK, G[IL]RDE[IL]AAG[IL]AAR	2	SLRAATRPAPPSPAAPARALSRPSPSPASAMASYMARAMSTSAAAAPPVSLDTINPKVLEFKYAVRGEIVTHAQNLEDELHKNPESLPFDEILYCNIGNPHSLGQQPVTFFREVLSLCDHPALLDKSETHALYSSDAIERAWQILDKIPGRATGAYSHSQGIKGLRDEIAAGIAARDGFHASGDNIFLTDGASPAVHMMMQLLIRSEKDGILCPLPQYPLYSASITLHGGSFVPYYLDEETGWGLEVDELKKQLDEARSKGITVRALVVINPGNPTGQ	1.215	1.345	1.175	0.97	1.1	0.88	1.38, 1.05	1.57, 1.12	1.3, 1.05	0.94, 1.0	1.13, 1.07	0.83, 0.93	0.165	0.225	0.125	0.03	0.03	0.05
p657	TPM=119.01 TMHMM=1 SignalP=yes Putative ortholog: Os05g35710 coiled-coil domain-containing protein 47 precursor, putative, expressed comp1242_c0_seq1_g391	EVAGDM[IL]SEAV[IL]DQV[IL]GEK, NFS[IL][IL]GTGDGK, [IL][IL]E[IL][IL]FPK	3	APPAPPRTPAELLRAFSIEIACVSFLICFLLNYFTGKKQNEAIALAWATRFATRDSIFDKNFSLLGTGDGKDTPLLLKEGQDVFKFYASGRRFCQGMLATMEMRARHDLLSKLLELLFPKKDTITFEVVMNDESMDHVMVAVARKKAAKTMHKEERDLQKFASVLASAPAGKKWIADELAVVAESKEVAGDMISEAVLDQVLGEKAFEKLGKWFISLHFSDQLAGSYKKVLSFKFVLPDANNMAEMTKLVALVPFYIDLIGRYKLSSHARSKTDAARTKAAQEAFRELQGVRQETLLRKKAEKKKLMEEAEAKLSAEVLRKKEEKERNRQMKKGAPKVKMLRS	0.933333	1.05333	1.11333	1.19667	1.12667	1.06333	0.97, 0.92, 0.91	1.01, 1.04, 1.11	1.1, 1.12, 1.12	1.14, 1.21, 1.24	1.04, 1.12, 1.22	1.09, 1.08, 1.02	0.0185592	0.0296273	0.00666667	0.0296273	0.0520683	0.0218581
p7962	TPM=643.13 Putative ortholog: Os01g62350 60S ribosomal protein L36-2, putative, expressed comp189_c0_seq1_g428	EVAGFAPYEK, SG[IL]FVG[IL]NK	2	MAPTQPKSGLFVGINKGHVVTKRELPPRPSDRKGKGTKRVHFVRNLIREVAGFAPYEKRITELLKVGKDKRALKVAKRKLGTHKRAKKKREEMSSVLRKMRSAGTETKKK	0.97	1.04	0.91	0.95	1.085	0.865	1.01, 0.93	0.96, 1.12	0.73, 1.09	0.73, 1.17	0.96, 1.21	0.76, 0.97	0.04	0.08	0.18	0.22	0.125	0.105
p59390	TPM=276.19 comp372_c0_seq1_g739	EVAVNSYWG[IL]EQSQTK, MH[IL]MTFMEVAQPR, [IL]DNVPAPA[IL]A[IL]DYWR	3	SARPLLAGGEGSWARLMSTSAAKDQAAKAADAAAVAGKGGDGEKKEVAVNSYWGIEQSQTKLVREDGTEWKWSCFKPWETYTADTSIDLTKHHVPKTMLDKIAYYTVKSLRFPTDIFFQRRYGCRAMMLETVAAVPGMVGGMLLHLRSLRRFEQSGGWIRALLEEAENERMHLMTFMEVAQPRWYERALVITVQGVFFNAYFLGYLISPKFAHRVVGYLEEEAVHSYTEFLKDLEDGKIDNVPAPAIAIDYWRLPANATLKDVVTVVRADEAHHRDVNHFASDVYYQGMQLKATPAPIGYH	1	1.00667	1.02667	1.02333	1.00333	1.02667	0.98, 1.01, 1.01	1.03, 1.09, 0.9	0.94, 1.1, 1.04	0.95, 1.09, 1.03	1.04, 1.08, 0.89	0.91, 1.01, 1.16	0.01	0.0560753	0.0466667	0.0405518	0.0578312	0.0726483
p9757	TPM=125.32 Putative ortholog: Os01g70020 DEK C terminal domain containing protein, expressed comp1112_c0_seq1_g1282	EVDFNTAT[IL]AD[IL][IL]R, E[IL]HAVVSD[IL][IL]K, TTV[IL][IL]QGPGTM[IL]K	3	MAIDAKPASPAPEDPPADDPMDAEAEAEKAESDAEEQEEDGDEEEQQPKKRGRRKGLTGEERALASPASERPSRERKTVERYAELTPRSTSAKKTTVILQGPGTMLKEIPNVSFKLSKRKSDEVLQSLHTIMFGKKSRVHFLKRNISQFSGFVWIENEDKQRTKVKDKLDKFNKEKLLDFCEILDVNVKGTLKKEEVSAKLLEFLESPCITRDVVLTEVKKGKKRGRKSKASGQASAEGASGEKKKRKSRKQAVEAEKENDEEDAGPAGSEDVPMGEDDDDSEAQEDAGSDEEPEETPAKKKINRWETRKKGSWFEDVEPESKKAGKKASKSSTKEPNTPVDKANKKVSKPKKDEKENQSNNKTPKKRGAKASSENKGKGKGSTDAGSAPTTKELHAVV…	0.98	0.97	0.986667	1.01	0.993333	1.01667	1.07, 0.91, 0.96	1.01, 0.9, 1.0	1.05, 0.93, 0.98	0.98, 1.03, 1.02	0.94, 1.0, 1.04	1.04, 1.03, 0.98	0.0472582	0.0351188	0.034801	0.0152753	0.0290593	0.0185592
p3662	TPM=84.68 TMHMM=4 SignalP=yes Putative ortholog: Os05g32850 CBS domain containing protein, expressed comp3835_c0_seq2_g377	EVDGESQ[IL]TAP[IL][IL]SNAEER, QVN[IL]VEP[IL][IL]ENR	2	VSVAALLVQGDDTAFGSLEWWAYAGISCFLVLFAGIMSGLTLGLMSLGLVELEILQRSGTDSEKAQAATILPVVQKQHQLLVTLLLCNAVAMEALPIFLDRIFHPVVAVVLSVTFVLAFGEVIPQAICTRYGLAVGANFVWLVRILMIMCYPISYPIGKLLDCALGHNESALFRRAQLKALVSIHSKEAGKGGELTHDETTIISGALDLTEKTAQEAMTPIESTFSLDVDSKLDWEAIGKILARGHSRVPVYSGNPRNVIGLLLVKSLLTVRAETETPVSAVSIRRIPRVPADMPLYDILNEFQKGSSHMAAVVKAKPKNLPGPDKTEPNREVDGESQLTAPLLSNAEERMENVVVDIEAPQSRQVNGNKPVARSSEDIEEGEVIGIITLEDVFEELLQ…	0.965	0.875	0.905	0.94	0.905	1.035	0.95, 0.98	0.85, 0.9	0.78, 1.03	0.83, 1.05	0.89, 0.92	0.93, 1.14	0.015	0.025	0.125	0.11	0.015	0.105
p4507	TPM=47.67 TMHMM=2 Putative ortholog: Os03g24580 transmembrane protein 85, putative, expressed comp5302_c0_seq1_g1367	EVEYAGGG[IL]P[IL]M, [IL]NT[IL]G[IL][IL]PTNASDWVSS[IL]SPAR	2	VRCKLGGGGSAVFPSTPIVQNSEPKQIPQQQRPPAMEKGKGLARRWAVELHDASSSSSSAAFPDPPGFTRSAPEADDAATARQRKEAEATWKGQKAWEVAQAPFKNLMMMGFMMWMAGSTVHLFSIGIVFSALWQPFNALRSVGKVFEPFKDPRVDTLAPKLLFIALNLAAMGLGVWKLNTLGLLPTNASDWVSSLSPAREVEYAGGGIPLM	0.985	0.785	1.045	1.06	0.8	1.435	0.98, 0.99	0.57, 1.0	1.05, 1.04	1.07, 1.05	0.59, 1.01	1.83, 1.04	0.005	0.215	0.005	0.01	0.21	0.395
p713	TPM=63.26 TMHMM=1 SignalP=yes Putative ortholog: Os07g49270 AMP deaminase, putative, expressed comp1262_c0_seq1_g1047	EVFAD[IL]EASK, T[IL]P[IL]PPG[IL]PP[IL]HTGR, [IL]PTDGDDTDYD[IL]TDGEEDR	3	PPPPPPTPIPSPPPPPPPNPSAAPRRRAMESNAYTLHLAVAALVGASFAAASAYYMHRKTLDQLLRFARSLDRDQRRRARLPTDGDDTDYDLTDGEEDRAPPARDYDRRTLPIPPGLPPLHTGREGKPTISPASKRVGPLVRPTTPKSSVPNVSTFESIEDSDDDDVDLASDSKNDEAVYVGTNGAIGSDPVPVQASQNGDGKPVSSSNMIRSHSATGSLHGVQLNPIAADILRKEPEHETFSRINITAVETPSHDEIEAYKVLQKCLELREKYIFREEVAPWEKEIITDPSTPKPNPNPFNYEHQTKTEHHFEMVDGVVHLYPSKDSKERLYPVADATTFFTDMHYILRVLAAGDIRTVCHHRLNLLEQKFNLHLMVNADRELLAQKAAPHRDFYNVR…	1.01	0.966667	0.946667	0.933333	0.956667	0.99	0.95, 0.94, 1.14	1.03, 0.78, 1.09	0.82, 0.94, 1.08	0.86, 1.0, 0.94	1.08, 0.84, 0.95	0.79, 1.19, 0.99	0.0650641	0.0949269	0.0751295	0.0405518	0.0693622	0.11547
p60916	TPM=1066.94 comp105_c0_seq1_g1469	EVPVDAVFQK, E[IL]Q[IL]Q[IL]EK	2	LVAYVKTPRGLRTLNTVWAQHLSEDVRRRFYKNWCKSKKKAFTKYALKYDSDAGKKEIQLQLEKMKKYATNIRVIAHTQIRKMKGLKQKKAHLMEIQVNGGTIADKVDYGYKFFEKEVPVDAVFQKDEMIDIIGVTKGKGYEGVVTRWGVTRLPRKTHRGLRKVACIGAWHPARVSYTVARAGQNGYHHRTEMNKKVYKIGKVGQETHDASTEFDRTEKDITPMGGFPHYGVVKGDYLMIKGCCVGPKKRVVTLRQSLLKQTSRLALEEIKLKFVDTSSKFGHGRFQTTDEKQKFYGKLKA	1.035	1.7	1.165	1.19	1.62	0.75	1.26, 0.81	2.17, 1.23	1.14, 1.19	0.91, 1.47	1.73, 1.51	0.53, 0.97	0.225	0.47	0.025	0.28	0.11	0.22
p8521	TPM=891.16 Putative ortholog: Os02g01560 40S ribosomal protein S4, putative, expressed comp79_c0_seq1_g209	EVQS[IL][IL]MQR, FDVGNVVMVTGGR, GTKPWVS[IL]PK, G[IL]PY[IL]NTYDGR, TYPAGFMD[IL][IL]S[IL]PK, [IL]GNVFT[IL]GK, [IL]NAPSHWM[IL]DK, [IL]VDF[IL]K	8	MARGLKKHLKRLNAPSHWMLDKLGGAFAPKPSSGPHKARECLPLILILRNRLKYALTYREVQSILMQRHIQVDGKVRTDKTYPAGFMDIISIPKTGENYRLLYDTKGRFRLHAVRDEDAKFKLCKVRGVQFGQKGIPYLNTYDGRTIRYPDPLIKANDTIKLDLETNKIVDFIKFDVGNVVMVTGGRNTGRVGVIKNREKHKGTFETIHVEDAQGHQFATRLGNVFTIGKGTKPWVSLPKGKGIKLSIIEEQRKRDAAAQAAAKA	0.95875	1.03625	0.96875	1.01625	1.08875	0.9475	1.01, 1.02, 0.95, 1.08, 0.89, 0.88, 0.97, 0.87	0.95, 0.99, 1.27, 0.87, 1.15, 1.03, 1.12, 0.91	0.92, 1.02, 0.95, 0.99, 0.94, 1.02, 1.03, 0.88	0.91, 1.0, 1.0, 0.91, 1.06, 1.17, 1.07, 1.01	0.94, 0.97, 1.33, 0.8, 1.29, 1.17, 1.16, 1.05	0.96, 1.04, 0.75, 1.14, 0.82, 0.99, 0.92, 0.96	0.0267553	0.0477694	0.019313	0.0303514	0.0642939	0.0430428
p4597	TPM=17.36 TMHMM=2 Putative ortholog: Os03g06180 expressed protein comp5444_c0_seq1_g902	EVTVANAP[IL]EGMK, GDFV[IL]EQ[IL]ANN[IL]K, SDP[IL]A[IL]FAEMAK, TTMES[IL]VEAQHNMK	4	MLRMSPPPPSSFLIFSLYDNLPKGDFVLEQLANNLKETSTITPFSASYVFKSLNKSDPIALFAEMAKEHDRDSSSHEQPLTSLGNTIDQVRDEAREVTVANAPIEGMKEEGLTDSLLVLVGLVSPISKLGPVIQQVTSWDNPPLTGSVLAVTLLIIYNEWVGYALAAALILAVSAMFWARQRKIGEICSEVIIDTSSDKTTMESIVEAQHNMKKVHEYVKTANIVILRLWSIVLARSPKHTETVIWMLTGLAVALAVVPFKYVLMGLTVAIFVGNTRAVKAVSNPRGSRRWREWWESIPAVPVHTVDKGELRTA	0.945	1.075	0.9975	1.0525	1.14	0.9375	0.94, 1.1, 0.83, 0.91	0.97, 1.27, 1.09, 0.97	1.01, 1.15, 0.8, 1.03	1.08, 1.05, 0.95, 1.13	1.03, 1.16, 1.3, 1.07	1.05, 0.91, 0.73, 1.06	0.0566422	0.0708872	0.0727295	0.0379418	0.0598609	0.0771767
p8893	TPM=70.97 Putative ortholog: Os06g10430 protein of unknown function DUF1296 domain containing protein, expressed comp1268_c0_seq1_g1038	EVVGEHSDAD[IL][IL]DA[IL]R, [IL][IL]NQDPFHEVK	2	MAAGGDSSGGSGPRPSDKAARPPMTAIDSTIQSIKEVVGEHSDADILDALRDSNMDPNETAQKLLNQDPFHEVKRKKDKKRESAGQKSFAQTSAQGEHGPQGTRPHTQRVEIDQRRAHNQGQAYGPNREFRVVRDNRHGSMENKSELGHKGSTYMPGSDRSGVAVQSDRNHPPATNSEGQITHQTAKNVLQMSRGAHGTYQRHARPYLKNIQNEHQHPNSDPAHSSPNYKATGGSVGPNRREAGVANAPRQYSGRPGSQFHAPNGSYPANIQRGNFASAGPSGHRPSFVSRNTQPNQRPALDTVSRGRSAGRSFGNQNTNKYHQGPAGNIKAIRPAKQWKPKSTNKSSTNDADNSVTDAVSPLDSNPENAKALDVNSLCDKTSHSNVHEMEHVIIPDHL…	0.96	1.07	1.035	1.085	1.12	0.965	1.0, 0.92	1.03, 1.11	0.99, 1.08	0.99, 1.18	1.03, 1.21	0.96, 0.97	0.04	0.04	0.045	0.095	0.09	0.005
p8231	TPM=111.2 Putative ortholog: Os01g11570 GDSL-like lipase/acylhydrolase, putative, expressed comp460_c1_seq1_g1021	EWWQATDTK, TAGPPVVMNP[IL]SR	2	HRFFLHASPTPNPPPPLRKQARTARTRHRIRLAAEGSEAPMGAKYIVGSLVGSCVIAYACDYIVSQKKIFGGTIPGTVSDKEWWQATDTKFQAWPRTAGPPVVMNPISRQNFIVKDL	0.95	1.075	0.965	1.045	1.135	0.91	1.05, 0.85	1.14, 1.01	0.82, 1.11	0.78, 1.31	1.08, 1.19	0.72, 1.1	0.1	0.065	0.145	0.265	0.055	0.19
p14143	TPM=55.5 Putative ortholog: Os01g05010 mitochondrial glycoprotein, putative, expressed comp3067_c0_seq1_g1379	EY[IL]FW[IL]NK, ST[IL]P[IL][IL]VTVSK	2	MPFSSATAVKPSSDEELLRVIKSEIKFAQDCDDHDRVEEIPENFPFKITDKKGLNEITLTRTYQGEKIEVLVSMPSLVTGDEAEHDQDEDDKEKDDDQEDGEKAPKSTIPLIVTVSKSDGPSLEFTCTAYPDEIMIDTLSVKQPAANDDEELIAYEGPDFNDLDENLQRAFHKYLELRGISPLTTNFLHEYMINKDSREYLFWLNKLKDFVKQ	0.94	1.06	0.98	1.045	1.135	0.93	0.93, 0.95	1.19, 0.93	1.03, 0.93	1.11, 0.98	1.29, 0.98	0.86, 1.0	0.01	0.13	0.05	0.065	0.155	0.07
p10500	TPM=78.37 Putative ortholog: Os10g28080 glycosyl hydrolase, putative, expressed comp2051_c0_seq1_g157	EY[IL]GAQ[IL]TGVR, TS[IL]APFEDVEVQK	2	MTNGYVFREYIGAQITGVRFSDVPVNAGLSFHFILAFAIDYMATKSSPPAPTNGVFAPFWDTANLSPAAISATKAAHPNLSVMVGLGGDSVQNTGVKVAFAPSSVDSWVANAVSSLSTMINRYGLDGVDVDYEHFGGADVDTFVECIGRLLTQLKARFPNIKTSIAPFEDVEVQKHYKALWSKYSGVIDYINFQFYGYGANTNVDYYVKFYDLQARNYPGSGAKLLASLETGNITQQLGLLSPEQGIAGAKELLRQGKLPGFFIWSADSSKASPYRFEFETKAQQIVANH	1	0.98	0.955	0.95	0.98	0.965	1.04, 0.96	0.96, 1.0	0.96, 0.95	0.92, 0.98	0.92, 1.04	0.99, 0.94	0.04	0.02	0.005	0.03	0.06	0.025
p9292	TPM=64.08 Putative ortholog: Os02g05680 apoptosis-inducing factor 2, putative, expressed comp1998_c0_seq1_g402	EYME[IL]SWAE[IL]R, MATYSTGYP[IL]A[IL]VS[IL]GR, QSVD[IL]DS[IL]SNTEK, VVVVGGG[IL]GGA[IL][IL]AK, [IL][IL]EF[IL]DQNASK	5	RSENCSCQLEERDSAAMAETGKPRVVVVGGGIGGALLAKTMEPDADVVLLDPKEYMEISWAELRSMVEPSFAERSLIYHKDYLTTATIVTSSAVNITEDSVLTADGQSLAYDYLVVATGHVLASPGSRAERLTEFQRDSGKIKSSESVLIIGGGPTGVELAAEIAVDYPEKKVTIVHRGSRLLEFIDQNASKKCLDWLTSKKVDVLFKQSVDLDSLSNTEKLYKTSSGETVTADCHFLCIGKPLSSSWLHDTMLKESLDSKGRLMVEKDLRVKGYNNIFAIGDITDIPEIKQGYLAQKHALLVAKNLKLLIKGSPASKMATYSTGYPLAIVSLGRKEGLAQLPFVTLTGCIPGMLKSKDLFVGKTRKQMGKCWWCVVNGDEALDKANGSFMPVGPLKWK…	0.964	0.964	0.928	0.968	1.004	0.966	0.9, 1.02, 0.9, 0.97, 1.03	0.97, 0.9, 0.92, 0.96, 1.07	0.89, 0.94, 0.96, 0.96, 0.89	1.0, 0.93, 1.06, 0.99, 0.86	1.08, 0.89, 1.02, 1.0, 1.03	0.92, 1.04, 1.04, 0.99, 0.84	0.0280357	0.0294279	0.0159374	0.0339706	0.0314006	0.0384187
p9435	TPM=218.21 Putative ortholog: Os01g68770 selenium-binding protein, putative, expressed comp403_c0_seq1_g689	F[IL][IL][IL]PS[IL][IL]SGR, QT[IL]D[IL]GSTG[IL][IL]P[IL]EVR, TGFD[IL]QHVQDG[IL]YGR, TM[IL]SSSWGAPAAFR, WDEQFYG[IL]D[IL][IL]R	5	NGGGAGCCAAKGPGYATPREAMEKGPREGLLYVTCVYNGTGINKPDYLATVDVDPNSVTYSQVIHRLPATHIGDELHHSGWNACSSCHGDPSTSRRFLILPSLLSGRVYVVDTATDPRAPALHKVVQAEDIAEKTGLGFPHTSHCLATGDIMISCLGDKEGNAAGNGFLLLDSEFNVKGRWEKPGHSPLFGYDFWYQPRHKTMISSSWGAPAAFRTGFDLQHVQDGLYGRHLHVYDWPGGELKQTLDLGSTGLLPLEVRFLHDPSKDTGYVGCALTSNMVRFFKTADGSWSHEVAISIKPLKVRNWMLPEMPGLITDFVLSLDDRYLYLVNWLHGDIRQYNIEDPAKPVLAGQVWVGGLLQKGSDAVFVTDDDKEEQYTVPQVKGNRLRGGPQMIQLSL…	0.914	0.886	0.924	1.012	0.97	1.046	0.87, 0.95, 0.99, 0.91, 0.85	0.87, 0.86, 1.0, 0.92, 0.78	0.93, 0.89, 0.97, 0.96, 0.87	1.07, 0.94, 0.98, 1.05, 1.02	1.0, 0.91, 1.01, 1.01, 0.92	1.07, 1.03, 0.98, 1.04, 1.11	0.0256125	0.0362767	0.0193907	0.0235372	0.0225832	0.021587
p6711	TPM=97.12 Putative ortholog: Os02g12650 puromycin-sensitive aminopeptidase, putative, expressed comp730_c1_seq1_g831	F[IL][IL]NF[IL]EPFAQR, NMAVTQFEPADAR	2	MAESPEQFRGQSRLPRFAEPLRYDLLLRPDLAACTFSGSVDVALHVAAPTRFLVLNAADLDVSAADVRFTPHGSDQALCPVEVTNELKDEILIIRFNEVLPLGEGTLVIAFLGTLNDKMKGFYRSVYELNGEKKNMAVTQFEPADARRCFPCWDEPAFKAVFKITLEVPSETVALSNMPVVEEKVNGPTKTVYFQETPIMSTYLVAVIVGMFDYVEAFTSDGTSVRVYTQVGKSAQGKFALEVAVKTLILFKEYFAVPYPLPKMDMIAIPDFSAGAMENYGLVTYRETALLFDERHSAAANKQRVAVVVAHELAHQWFGNLVTMEWWTHLWLNEGFATWVSYLAADCFFPEWNVWIQFLEESTTGFRLDALAGSHPIEVDVNHVDEIDEIFDAISYRKG…	1.005	0.825	0.95	0.94	0.815	1.155	1.03, 0.98	0.82, 0.83	0.94, 0.96	0.91, 0.97	0.79, 0.84	1.15, 1.16	0.025	0.005	0.01	0.03	0.025	0.005
p13328	TPM=58.21 Putative ortholog: Os01g12870 eukaryotic translation initiation factor 3 subunit E-interacting protein, putative, expressed comp2043_c0_seq1_g847	F[IL]TPSPPV[IL]DQP[IL]TNYNQDAYR, SD[IL]AQ[IL][IL]ER, [IL][IL][IL]Y[IL][IL]K	3	MASAYDREDGLAPPQPHGGGPADAYDPNYVPDSVKTFVVHLYRHIRDKNVFEINQMYEGGFQRLSDRLFRDSPWPSADAVAPYCDGDHVFLLLYRELWYRHAYARLSPLTASHRSESWSNYCDLFSVVLHGVVNMQLPNQWLWDMVDEFVYQFQSFCQYRAKLKNKTDDELKQLKQFDKAWNVYGVLNYLQALVEKSDIAQILEREKEGLEQFTATDGYDYQGGSNVLKVLGYYSMIGLLRIHCLLGDYHTGLKCLAPINLNQQGVYTIVIGSHISTIYHYGFANLMMRRYVDATKEFNKILLYILKYKQYHQKSPQYDQILKKNEQMYALLAICLSLCPQNKLIDENVSTQLKEKYNDKMTKMQRFDEEAYAAYDELFSYACPKFITPSPPVLDQPLT…	0.963333	1.04667	1.02667	1.06	1.08	0.98	1.02, 0.97, 0.9	1.25, 0.98, 0.91	1.18, 1.02, 0.88	1.16, 1.05, 0.97	1.22, 1.01, 1.01	0.95, 1.03, 0.96	0.034801	0.103655	0.0866667	0.0550757	0.07	0.0251661
p3404	TPM=41.23 TMHMM=1 Putative ortholog: Os08g06020 MSP domain containing protein, expressed comp3399_c0_seq1_g542	F[IL]VQSV[IL]APSG[IL]NVK, S[IL]EAGA[IL][IL]SK, VTYVSPPQPPSPVPEESEEGSPSR, YSVRPNTGVV[IL]PR	4	MASPGPAPAGELLRIDPIELRFPFELKKQISCSMQLSNLSDDYIAFKVKTTSPKKYSVRPNTGVVLPRSTCDVVVTMQAQRENPPDMQCKDKFLVQSVIAPSGINVKDVTGEMFTKESGNKVEEVKLRVTYVSPPQPPSPVPEESEEGSPSRGESENGDGPAGGFTRALRERIEPQEKSLEAGALISKLTEEKNSAIQQNHKIRQELDMMRREVSKRRGGFSFVIVIIVALIGIFLGYMMKS	0.9775	0.9625	0.9075	0.945	1.0025	0.9475	0.93, 0.87, 1.19, 0.92	0.99, 1.01, 0.96, 0.89	0.89, 0.87, 0.86, 1.01	0.95, 1.0, 0.73, 1.1	1.07, 1.16, 0.81, 0.97	0.89, 0.86, 0.9, 1.14	0.0720388	0.0262599	0.0347311	0.0781558	0.0749861	0.064727
p6354	TPM=84.74 Putative ortholog: Os06g15990 aldehyde dehydrogenase, putative, expressed comp811_c0_seq1_g70	FAD[IL][IL]DK, FND[IL]NEV[IL]K, GVEQGPQ[IL]DDEQFNK, TAEQTP[IL]SA[IL]YVSK, YG[IL]AAGVFTNN[IL]NTANT[IL]TR, [IL]AQEE[IL]FGPVQS[IL]FK	6	MAAATRRAASSLVSRCLLARPAAVPSALRRPDGTRGLLPGVLQRFGTSAAAEEPISPPVQVRDTQLLINGKFVDAASGKTFPTLDPRTGEVIARVAEGDAEDIDRAVAAARKAFDEGPWPRMTAYERSRILLRFADLIDKHNDDIAALETWDNGKPYEQAAKIEVPMVSRLMRYYAGWVDKIHGLIVPADGPHHVQVLHEPIGVAGQIIPWNFPLLMFAWKVGPALACGNTVVLKTAEQTPLSALYVSKLFHEAGLPDGVLNIVSGYGPTAGAALASHMDVDKVAFTGSTDTGKIIMELSARSNLKPVTLELGGKSPFIIMDDADIDHAVELAHFALFFNQGQCCCAGSRTFVHERVYDEFVEKSKARAARRVVGDPFRKGVEQGPQIDDEQFNKILRY…	0.98	0.988333	0.955	0.978333	1.01167	0.966667	0.79, 0.91, 1.04, 1.01, 1.09, 1.04	0.85, 0.95, 1.09, 0.95, 1.0, 1.09	0.85, 0.74, 1.06, 0.94, 1.11, 1.03	1.08, 0.82, 1.02, 0.93, 1.02, 1.0	1.08, 1.04, 1.04, 0.94, 0.92, 1.05	1.0, 0.78, 0.98, 0.99, 1.11, 0.94	0.0451664	0.037808	0.0571985	0.0372753	0.0266354	0.0439444
p8995	TPM=273.4 Putative ortholog: Os12g38310 mitochondrial import inner membrane translocase subunit Tim, putative, expressed comp391_c0_seq1_g1190	FAE[IL]NQGVATPD, MAVMVDQ[IL]QVR, SM[IL]GD[IL]DN[IL]PEEDK	3	FPRRAAAAAAAAMDKSMLGDLDNLPEEDKMRMAVMVDQLQVRDSLRMYNNLVERCFTDCVETFRRKTLDKQEESCVRRCAEKFLKHSMRVGMRFAELNQGVATPD	0.92	0.903333	1.03	1.13667	0.98	1.16	0.84, 1.07, 0.85	0.81, 1.01, 0.89	1.24, 0.92, 0.93	1.47, 0.85, 1.09	0.96, 0.94, 1.04	1.53, 0.91, 1.04	0.0750555	0.0581187	0.10504	0.180493	0.0305505	0.188768
p12993	TPM=44.09 Putative ortholog: Os02g53500 RFC5 - Putative clamp loader of PCNA, replication factor C subunit 5, expressed comp3207_c0_seq1_g93	FAP[IL]DGSHVTER, SEG[IL]DVDEGG[IL]TA[IL]VR	2	MAGATAAAPMDIDAPPAFKGKGPLPASAVKSSPWVEKYRPQSLADVAAHRDIVDTIDRLTDENRLPHLLLYGPPGTGKTSTILAVARKIYGSQYGNMILELNASDERGIGVVRQQIQDFASAHSLSFGAKPAVKLVLLDEADAMTKDAQFALRRVIEKYTRSTRFALICNHVNKIIPALQSRCTRFRFAPLDGSHVTERLQHIIKSEGLDVDEGGLTALVRLSNGDMRKALNILQSTHMASQQITEEAVYLCTGNPMPKDIEQIAFWLLNEPFSSSYKYISDMKMRKGLALIDIIREVTMFVFKIKMPSDVRVKLINDLADIEYRLTFACNDKLQLGALISTFTTARTALVASAD	0.945	0.915	0.975	1.025	0.965	1.065	0.96, 0.93	0.91, 0.92	1.04, 0.91	1.08, 0.97	0.94, 0.99	1.15, 0.98	0.015	0.005	0.065	0.055	0.025	0.085
p55426	TPM=2298.14 comp18_c0_seq1_g183	FAS[IL]GGT[IL]TDAQMVK, GDQ[IL][IL][IL]TAAQWEAR, RGDQ[IL][IL][IL]TAAQWEAR	3	VGRGLADEVDSRSREDGSRRTRAGAIGSCLGTTLMKLRGSYVSACVGAALLSYKKACNLSRFGVEKIKSKKGAVRAAGKTTPVFLLPTSCVCARDQSERELASLAPTFGIRATAMALVPHGGGAGGSAMPLFCPILTRDNYTVWAIKVEANLDVQGVWEAVVPEDSTAAVDPEKNKRARAYLLGALSEDILLQVSSKKMAAAIWECLKARFVGADRVKAARLSTLRGEFDRLIMADDEELDIYAGKIGCMAAKFASLGGTLTDAQMVKKLLDTVPDSLFAAVAGIEQFCDVETICFDDVLGRLKAFQERTERRKAAVGGERRGDQLLLTAAQWEARRRQRGGGHDHDDDDDGSSVASGAKGRRGKCWNCGVRGHFSRDCRQPRKEKALLADVEDHPCLL	1.02333	1.07	0.993333	0.966667	1.03667	0.946667	1.03, 1.01, 1.03	1.08, 0.92, 1.21	0.99, 1.06, 0.93	0.96, 1.04, 0.9	1.04, 0.9, 1.17	0.92, 1.15, 0.77	0.00666667	0.083865	0.0375648	0.0405518	0.0779601	0.110504
p9492	TPM=1811.1 Putative ortholog: Os08g02700 fructose-bisphospate aldolase isozyme, putative, expressed comp26_c0_seq3_g815	FAS[IL]NVENVEDNRR, KVAPEV[IL]AEYTVR, RFAS[IL]NVENVEDNR, TVPPAVPA[IL]VF[IL]SGGQSEEEATK, VAPEV[IL]AEYTVR, [IL]GTTEPSQ[IL]S[IL]DQNAQG[IL]AR	6	MSAYCGKYKDELIKNAAYIGSPGKGILAADESTGTIGKRFASINVENVEDNRRALRELLFCTPGALQYISGVILFEETLYQSTKAGKPFVEVLKEANVLPGIKVDKGTVELAGTNGETTTQGFDDLGKRCAKYYEAGARFAKWRAVLKIGTTEPSQLSIDQNAQGLARYAIICQENGLVPIVEPEILVDGPHDIDRCAYVTEIVLAACYKALNDQHVLLEGTLLKPNMVTPGSDAKKVAPEVIAEYTVRTLQRTVPPAVPAIVFLSGGQSEEEATKNLNAMNKLQTKKPWSLSFSFGRALQQSTLKAWGGKVENVENAQKAFLVRCKANSEATLGTYQGDATLGEGASESLHVKDYKY	0.95	0.905	0.965	1.01833	0.956667	1.06	0.95, 1.0, 0.78, 0.96, 1.06, 0.95	0.86, 0.93, 0.85, 0.96, 0.93, 0.9	0.9, 0.94, 0.86, 1.12, 0.98, 0.99	0.94, 0.94, 1.1, 1.16, 0.92, 1.05	0.91, 0.93, 1.09, 0.99, 0.87, 0.95	1.04, 1.0, 1.01, 1.16, 1.05, 1.1	0.0381226	0.0176541	0.0368556	0.0406953	0.0312694	0.0246306
p6721	TPM=948.34 Putative ortholog: Os08g03640 60S acidic ribosomal protein P0, putative, expressed comp66_c0_seq1_g872	FAVAAPAAAAASGGGAAAPK, GTVE[IL][IL]TPVE[IL][IL]K, V[IL][IL]AAADNVGSK, [IL]CS[IL][IL]DEYSK	4	MAIKRTKAEKKIAYDKKLCSLLDEYSKVLIAAADNVGSKQLQEIRKGLRGDSIVLMGKNTLIRRCIKVHAEKTGNKDYLELGNLLIGNVGLIFTKGDLKEVREEVAKYKVGAPARVGLVAPVDVVVPPGNTGLDPSQTSFFQVLNIPTKINKGTVEIITPVELIKKGDKVGSSESALLAKLGIRPFSYGLVINNVYDSGSVFSPEVLDLTEEDLMAKFASGVSMVASLSLAISYPTMAAAPHMFLNAYKNVLAIAVETDYSYPHADKIKEYLKDPSKFAVAAPAAAAASGGGAAAPKEEEKKEEPAEESDEEMGFSLFDD	1.105	1.165	1.0025	0.905	1.06	0.8625	1.02, 1.01, 1.18, 1.21	1.31, 1.01, 0.99, 1.35	1.11, 0.79, 0.97, 1.14	1.08, 0.77, 0.82, 0.95	1.28, 1.0, 0.84, 1.12	0.84, 0.78, 0.98, 0.85	0.0523609	0.0956992	0.0799349	0.0695821	0.0930949	0.042106
p13760	TPM=100.62 Putative ortholog: Os09g11250 co-chaperone GrpE protein, putative, expressed comp2133_c0_seq1_g517	FAVQNFSK, S[IL][IL]DVADN[IL]AR, T[IL][IL]EGVDMTDK, [IL]DTSEDSSGAVP[IL][IL]K	4	AARRRLCGVAAAAAQQPFASSRCSARVPYTLNQPLRYSTNIFQRFGFSSSTPQENDKEANQPKDQETTAQEINAETSKEDRGSSGGAEELDLSKEDLVKLVLEKDELLTSKDEEIKDMKDKVLRSYAEMENVISRTKRESENAKKFAVQNFSKSLLDVADNLARASSAVKESFSKLDTSEDSSGAVPLLKTLLEGVDMTDKQLGEVFKKFGVEKFDPLNEKFDPERHYAIFQMPDASKPSGTVAAVVKVGYMLHDRVLRPAEVGVTEGGPSEEDEPEQKSTGD	0.9875	0.9825	0.9675	0.985	0.995	0.985	0.94, 0.97, 0.99, 1.05	1.01, 0.93, 0.99, 1.0	1.1, 0.95, 0.83, 0.99	1.17, 0.98, 0.84, 0.95	1.08, 0.95, 1.0, 0.95	1.08, 1.03, 0.84, 0.99	0.0232289	0.0179699	0.0557337	0.0686173	0.0306866	0.0517204
p64832	TPM=64.59 comp3056_c0_seq1_g129	FD[IL]STAFPSGPA[IL]R, VP[IL]GV[IL]G[IL]PF[IL]SGVSAGGDAK, [IL]T[IL]EQTPH[IL]K	3	MKASIKFRDDDRPLLRAKVPIGVLGLPFLSGVSAGGDAKDLRFDLSTAFPSGPALRLSYHPNDPLQPFALSVRTGLGALGSPIRAPFALSAEFNLLSSNPPAFQLLFKPRIGDFSLANSVRSPPLSDAPPPHKLADLTNGDDHDHEGHKAFSLDGNGFVAAAGKSGGGVGTLLSGMRLTTRSMLPLWNKASLRFQWGLRVPPELKAALADDGYGRKAGNLAVSKLPLLVMNKITIEQTPHLKSEGDKKGTKSAPAAEEFSLLKRQLEALNDESIMLRHSVEGLRAEIGVGRAVSVPSKGEARRLQAISPPSQHPFPVKPDGIGKELAASGTNDAGEELKKALEARRK	1.08667	1.04667	1.02667	0.943333	0.966667	0.99	1.13, 1.12, 1.01	0.9, 1.19, 1.05	1.06, 1.09, 0.93	0.94, 0.97, 0.92	0.8, 1.06, 1.04	1.17, 0.92, 0.88	0.0384419	0.0837324	0.0491031	0.0145297	0.0835331	0.0907377
p1860	TPM=93.39 TMHMM=1 Putative ortholog: Os07g07000 syntaxin, putative, expressed comp1869_c0_seq1_g48	FDE[IL]EKDN[IL]SNR, GQ[IL][IL]DTVAE[IL]QER, KVDG[IL]ES[IL][IL]AK, [IL]TN[IL][IL]TK	4	MNNLLTDSFELPRRDSSRDGDVEMGMHQPDASDNLKGFLKKVDGIESLIAKLTNLLTKLQTANEESKAVTKASAMKAIKQRMEKDIDEVGKIARLAKAKFDELEKDNLSNRQKPGCGKGSAVDRSREQTTGAVKKKLKGRMDEFQVLRESIRQEYREVVERRVFTVTGNRPDEETIDDLIETGRSEQIFKDAVQQQGRGQILDTVAEIQERHDAVRDLERKLLELQQIFLDMAVLVDAQGDMINHIETHVSNATNHISQGVGALQNAKKLQRNSRKWMCYAIILLLVVVVIVVVAVIQPWKK	1.04	1.105	1.0525	1.0175	1.0675	0.9575	1.02, 1.12, 1.07, 0.95	1.07, 1.02, 1.2, 1.13	0.98, 1.06, 0.98, 1.19	0.96, 0.95, 0.91, 1.25	1.05, 0.91, 1.12, 1.19	0.92, 1.04, 0.82, 1.05	0.0362859	0.0388373	0.0495606	0.0782491	0.0597739	0.0545245
p2787	TPM=70.45 TMHMM=1 Putative ortholog: Os05g48020 SNARE domain containing protein, putative, expressed comp2638_c0_seq1_g619	FDSTSDGNFDDEYFK, QDEG[IL]D[IL][IL]GEG[IL]ET[IL]R	2	SPPAHHRPAASGCSSLSVAAFPPQSSSRRRDRGARMTVIDILTRVDAICQKYDKYDVEKLNGANVAGEDPFARLYGSVDAEISQCEEKAEAARQEKSRAAVVAINAEIRRAKAKLIEEDMPKLMRLAVKKVKGLTKEELTTRSELVSALPDRIQSIPDGSATAAKSNGGWGASGSRPGGGIKFDSTSDGNFDDEYFKGTEESNKFRQEYEMRRMKQDEGLDIIGEGLETLRNMAADMNEELDRQVPLMDEMDDKVDRANADLKNTNVRLKQTILQMRSSRNFCIDIVLLCVILGIAAYLYNVLKK	0.945	1.035	1.07	1.13	1.095	1.035	0.99, 0.9	1.09, 0.98	1.13, 1.01	1.14, 1.12	1.1, 1.09	1.04, 1.03	0.045	0.055	0.06	0.01	0.005	0.005
p6629	TPM=152.02 Putative ortholog: Os06g38960 expressed protein comp558_c0_seq1_g696	FDTPTSEASMSTGR, VEPAAAVEAPPSGSAPR	2	NGSDSHPLTGRPTARPEPGGTIQPRGSILPKASISRPPVSVLVGGWGWARSSSSIQPRRIESMATPGDQSGSAAAKGSRLRYPLRSASRGKVEPAAAVEAPPSGSAPRRVKPSSDVTRSVCALDLSSAKDKSAKPPRRHSIPTKPGASPRPAATGTITPVSVVRSRRSDIVGKFDTPTSEASMSTGRRKFSTLSSISYWMTQIRLAEAASKHSISLGFFKLALQSECEPLDRMREELKAYVTRHGLTTELEEPVKDVLQVYDIAEDFEKLKISAETSQEAKKSDKAALSATNVTPKGSLKPRSLNSVATQNKDGKKENIQKEKLDAKVRGSYNRNPTKNAPGKETAAKNTVKKTKKQAKEQQEDVNGGSDALSVGSEQASVDVVKEMITYEDKENMGDT…	1.125	0.95	1.18	1.05	0.845	1.27	1.1, 1.15	0.83, 1.07	1.27, 1.09	1.15, 0.95	0.76, 0.93	1.52, 1.02	0.025	0.12	0.09	0.1	0.085	0.25
p9753	TPM=107.92 Putative ortholog: Os06g29220 erythronate-4-phosphate dehydrogenase domain containing protein, expressed comp1181_c0_seq1_g1275	FEED[IL]DAM[IL]PK, GEDFPAENY[IL]VK, [IL]Q[IL]NPE[IL]EK, [IL]VGVFYK	4	DLCQLALSVERLSLSPLLGFPSMAMWRAAARQLVDRALGSRAAHTSAGSKKIVGVFYKAGEHADKNPNFVGCVEGALGIRNWLESKGHHYIVTDDKEGPNSELEKHIEDMHVLITTPFHPAYVSAERIKKAKNLELLLTAGIGSDHIDLPAAAAAGLTVAEVTGSNTVSVAEDELMRILILVRNFLPGYQQVVQGEWDVAGIAHRAYDLEGKTVGTVGAGRIGRLLLQRLKPFNCNLLYHDRLQINPELEKEIGAKFEEDLDAMLPKCDVIVINTPLTEKTRGMFNKEKIAKMKKGVIVVNNARGGIMDAQAVADACSSGHIAGYGGDVWFPQPAPKDHPWRYMPNHAMTPHISGTTIDAQLRYAAGVKDMLDRYFKGEDFPAENYIVKEGELASQYKA…	0.9125	0.98	0.965	1.0575	1.0725	0.9875	0.96, 0.84, 0.97, 0.88	1.07, 0.9, 1.01, 0.94	0.92, 0.98, 1.14, 0.82	0.95, 1.17, 1.18, 0.93	1.12, 1.06, 1.04, 1.07	0.85, 1.1, 1.13, 0.87	0.0314576	0.0376386	0.0670199	0.067992	0.0170171	0.0739792
p638	TPM=82.03 TMHMM=8 Putative ortholog: Os08g06380 CSLF6 - cellulose synthase-like family F; beta1,3;1,4 glucan synthase, expressed comp1234_c0_seq1_g1420	FEGVDPTD[IL]YANHNR, QYGPPASADNP[IL]DFSTVDVR, [IL]NS[IL]EHD[IL]K	3	MAPAVAAGGRVGTVEAPAVAAAKKPCACGFQVCACTGSAAVASAASSLDMDIMDSGRIGPPGNEGWVGVELGPETDESGAVVDDRPVFKTEKIKGVLLYPYRVLIFVRLIAFTLFVIWRISHKNPDAMWLWVTSICGEFWFGFSWLLDQLPKLNPINRIPDLAVLRQRFDRPDGTSTLPGLDIFVTTADPIKEPILSTANSVLSILAADYPVDRSTCYVSDDSGMLLTYEALAEASKFATLWVPFCRKHGIEPRGPESYFELKSHPYMGRAQDEFVNDRRRVRKEYDEFKARINSLEHDIKQRNDGYNAAVVQGEGQPRPTWMADGNQWEGTWVDASENHRKGDHAGIVLVLVEHPSHHRQYGPPASADNPLDFSTVDVRLPMLVYMSREKRPGVNHQK…	0.986667	0.956667	0.916667	0.926667	0.966667	0.963333	0.99, 0.96, 1.01	0.85, 0.92, 1.1	0.85, 0.92, 0.98	0.86, 0.95, 0.97	0.86, 0.95, 1.09	1.0, 1.0, 0.89	0.0145297	0.074461	0.0375648	0.0338296	0.0669162	0.0366667
p6325	TPM=202.92 Putative ortholog: Os09g31486 DnaK family protein, putative, expressed comp634_c0_seq1_g3	FES[IL]VGN[IL][IL]ER, SAMAGDD[IL]DN[IL]K, SQTFSTAADNQTQVG[IL]K, VPAEVVTE[IL]ESAVSD[IL]R, VQDVVSQ[IL]FGK	5	MSMGSLIASRLARSGHALANRAISQAPRAPLHTTSPLLSRLGSVARAFSSKPSAADVIGIDLGTTNSCVSVMEGKTPKVIENAEGARTTPSIVAKNKTGDLLVGITASRQAVTNAQNTVRGSKRLIGRSFDDPQTQKEMKMVPYKIVRGPNGDAWVELAGQQYSPSQIGAFVLTKMKETAEAHLGKSVSKAVITVPAYFNDAQRQATKDAGRIAGLEVLRIINEPTAAALSYGMNNKEGLIAVFDLGGGTFDVSILEISNGVFEVKATNGDTFLGGEDFDAALLDYLVGEFKKSDSIDLSKDKSALQRLREAAEKAKVELSSTAQTDINLPFISADASGAKHFNLTLTRSKFESLVGNLIERTRSPCVNCLKDAGISAKEVDEVLLVGGMTRVPKVQDV…	0.964	0.926	1.034	1.082	0.962	1.152	1.14, 0.91, 1.0, 0.91, 0.86	1.05, 1.01, 1.06, 0.93, 0.58	1.08, 1.11, 1.06, 1.03, 0.89	0.95, 1.22, 1.07, 1.13, 1.04	0.92, 1.11, 1.07, 1.03, 0.68	1.03, 1.1, 1.0, 1.1, 1.53	0.0494571	0.0894763	0.0382884	0.0450999	0.0772917	0.0965091
p4270	TPM=18.07 TMHMM=1 SignalP=yes Putative ortholog: Os05g07890 embryo-specific 3, putative, expressed comp485_c1_seq1_g1372	FGEP[IL]PDNVWYGHNR, TSDAVSVAFGDAYR	2	MANPGLGAAASRMALPVLLLLVAVFAVSSLAQAPDNRTVAAAAAARTCKYTVKVKTSCASPPRTSDAVSVAFGDAYRNEAYGARLPGGGRAFERCGADTFHVTGACGYGVCYLYLRRAGRDGWAPEWVQVAEPSGPGAGEKPATFRFGEPLPDNVWYGHNRCPKAARTAAARTNTSSVDAASPLG	0.965	0.905	0.92	0.955	0.935	1.015	0.94, 0.99	0.88, 0.93	0.9, 0.94	0.96, 0.95	0.94, 0.93	1.02, 1.01	0.025	0.025	0.02	0.005	0.005	0.005
p7347	TPM=229.74 Putative ortholog: Os06g10810 phosphate carrier protein, mitochondrial precursor, putative, expressed comp453_c0_seq1_g837	FGFYEFFK, GWVPT[IL][IL]GYSAQGACK, G[IL]VP[IL]WGR, Q[IL]GV[IL]G[IL]FTR, S[IL]SSGFGV[IL][IL]K, TYSDMAGPENA[IL]K	6	ATLLLFLVNKSSASGERSESTAANARESQPGSPGPAAMALSDLSRESLLPSFLYSASPFTAASRLASPSPYQAAAPAPPASAFGGGAARGGKPFSLNSPNEKIEMYSPAFYAACTAGGIASCGLTHMAVTPLDLVKCNMQINPEKYKSISSGFGVLLKEQGARGFFRGWVPTLLGYSAQGACKFGFYEFFKKTYSDMAGPENAIKYKTLIYLAGSASAELIADVALCPMEAVKVRVQTQPGFARGLSDGLPKFIKAEGAAGLYKGIVPLWGRQIPYTMMKFASFETIVELIYKHAVPVPKSECSKSFQLGISFAGGYIAGVFCAIVSHPADNLVSFLNNAKGATMGDAVKQIGVLGLFTRGLPLRIVMIGTLTGAQWGIYDAFKVMVGLPTTGGVAPVP…	0.99	1.025	0.911667	0.926667	1.045	0.891667	0.83, 1.04, 1.15, 1.04, 0.97, 0.91	0.98, 1.15, 1.11, 0.94, 1.01, 0.96	0.78, 1.0, 1.0, 0.9, 0.87, 0.92	0.93, 0.97, 0.87, 0.87, 0.9, 1.02	1.18, 1.11, 0.97, 0.91, 1.04, 1.06	0.79, 0.87, 0.9, 0.96, 0.87, 0.96	0.0458258	0.0349046	0.0340995	0.0243128	0.0393912	0.0262573
p11389	TPM=68.32 Putative ortholog: Os02g03890 nuclear transport factor 2, putative, expressed comp2031_c0_seq1_g756	FGQ[IL][IL]PEGVA[IL]R, SVYVGNVPSNV[IL]EAD[IL]ENEFK	2	MASAAAAAANQVGTYFLRNYYNLLQQNPDVVHQFYNEASTMIRVDDVTGISTTANSMMDIHSLIMSLNFTQIEIKTANFTNSWGDGVIVMVSGLVQTKEYINQRKFIQTFFLAPQEKGYFVLNDYFHFVDQEQVQPAQGIPQETFETNMASTVQTSPEYIHEEESQTAQYAVPMPSEENDAVDNYAYSEPPQQVVSHSDNWGDEPLPEEPVSSFSNGMAVAPEEPVQQLPVQAPHVEEPVGEPVKKTYASILRSAKAPPPVPVAQAVPVNKPRPATESNQAAPVMTSSMAADKPKSDYYGEAHEEEESRSVYVGNVPSNVLEADLENEFKKFGQLIPEGVAIRSRKETGGYYAFVEFEELSGVHNALRASPLEINGRQIYVEERKPNSGIRGGRRGGRG…	1.02	1.06	1.005	0.985	1.04	0.945	1.0, 1.04	1.01, 1.11	0.91, 1.1	0.9, 1.07	1.0, 1.08	0.9, 0.99	0.02	0.05	0.095	0.085	0.04	0.045
p7564	TPM=100.75 Putative ortholog: Os01g68860 zinc finger C-x8-C-x5-C-x3-H type family protein, expressed comp1266_c0_seq1_g1252	FNHPE[IL]FNAVPSSR, SSSFPVPQYA[IL]QR, [IL][IL]ESPSGSASYPS	3	PPPPATATADTGTPSPDPDALYQEGMWHQMAMSSGATMQQGPYPERPGEPDCTYYLRTGLCRFGLSCRFNHPPDRNMAIASARIKGEYPERVGQPECQYYLKTGTCKFGPTCKFHHPREKAGIQGMAQLNSLGYPLRPNERECAYYLKTGQCKYGNTCKFNHPELFNAVPSSRGSPIYPSVHTSGSTGPHSYTGTTMASWAYPRGSFVPSPRWQGASNYAPMIVPQGLVQVPSWNSYPGQILPVSSSESRLQSPGAQQYYGTSRQGEGSAGNQGMLSPYRSSSFPVPQYALQRENVFPERPDQPECIYYIKTGDCKFGAVCKFHHPRVRSQPSPDCVLSPMGLPLRPGEELCKFYSRYGICKFGVNCKFDHPMATPVGVYAYGYSASASPNAPTARRLL…	1.03667	0.926667	1.02	0.983333	0.9	1.09667	1.02, 1.22, 0.87	0.97, 1.02, 0.79	0.94, 1.22, 0.9	0.91, 1.0, 1.04	0.95, 0.84, 0.91	0.96, 1.19, 1.14	0.101379	0.0698411	0.100664	0.0384419	0.0321455	0.0698411
p8921	TPM=288.99 Putative ortholog: Os02g02400 catalase isozyme A, putative, expressed comp345_c0_seq1_g1101	FPDV[IL]HAFK, FPDV[IL]HAFKPNPK, TTTTNAGQPVWNDNEA[IL]TVGPR, TWPED[IL]VP[IL]QPVGR	4	MDPCKFRPSSTFDKKTTTTNAGQPVWNDNEALTVGPRGPILLEDYHLLEKIAHFARERIPERVVHARGASAKGFFECTHDVTGLTCADFLRAPGARTPVIVRFSTVIHERGSPETIRDPRGFAVKFYTREGNWDLLGNNFPVFFIRDGIKFPDVIHAFKPNPKSHVQEYWRVFDFLSHLPESLHTFFFLFDDVGIPTDYRHMDGFGVNTYTFVTRQGKSHYVKFHWKPTCGVSCLMDDEATLVGGKNHSHATQDLYDSIDAGNFPEWKLFVQVIDPDEEDKFDFDPLDDTKTWPEDLVPLQPVGRLVLDRNVDNFFNENEQLAFGPGLVVPGIYYSDDKMLQCRVFAYADTQRYRLGPNYLMLPVNAPKCGFKNNHYDGAMNFMHRDEEVDYYPSRHAP…	1.035	1.12	1.015	0.9825	1.08	0.9175	0.99, 1.15, 1.03, 0.97	1.18, 1.39, 1.0, 0.91	1.07, 1.09, 0.93, 0.97	1.08, 0.95, 0.9, 1.0	1.2, 1.2, 0.98, 0.94	0.9, 0.79, 0.92, 1.06	0.0403113	0.106066	0.0386221	0.0383786	0.0697615	0.0554339
p3680	TPM=35.61 TMHMM=13 SignalP=yes Putative ortholog: Os01g27170 potassium transporter, putative, expressed comp3871_c1_seq1_g1382	FQ[IL]EQEEQ[IL]NPQVR, SET[IL]QS[IL]QS[IL]YEQESGG[IL]SR, [IL]S[IL][IL]PNQQAADEE[IL]STYYQPGTDR	3	SGGGGRELATMDEEIATAAARQGQWKHQYKALSLLAFQSFGVVYGDLSTSPLYVFKSAMSGNLHSYEDETTIFGLLSLIFWTLTLVPLLKYVIIVLAADDNGEGGTFALYSLLCRHAKLSLLPNQQAADEELSTYYQPGTDRAAVSSPFKRFLEKHKKLRTCLLLFVLFGACMVIGDGVLTPTISVLSALSGLQDPGTGGLGNGWVVFIACVVLVGLFALQHRGTHRVAFMFAPIVVLWLLSIGIIGLYNIIHWNPRICLALSPHYIVRFFKTTGKDGWIALGGVLLAVTGTEAMFADLGHFTAASIRLAFVGVIYPCLVLQYMGQAAFLSKNMSAVHDSFYLSIPRSVFWPMFVLASLAAIVGSQAIISATFSIVKQCLSLGCFPRVKVVHTSRWIYG…	1.07667	0.936667	0.93	0.87	0.876667	0.986667	1.02, 1.02, 1.19	1.01, 0.92, 0.88	1.07, 0.92, 0.8	1.04, 0.9, 0.67	0.99, 0.9, 0.74	1.06, 1.0, 0.9	0.0566667	0.0384419	0.0781025	0.107858	0.0731057	0.0466667
p10096	TPM=244.51 Putative ortholog: Os03g28330 sucrose synthase, putative, expressed comp212_c0_seq1_g618	FQE[IL]G[IL]EK, MATTVP[IL]A[IL]EGEVSGK, S[IL]SA[IL]QDA[IL]R, [IL]GDS[IL]SAHTNE[IL]VAVFSR, [IL]KDTAFED[IL][IL]R	5	MGESAGERALSRLHSVRERIGDSLSAHTNELVAVFSRLVNHGKGMLQPHQITAEYNAAIPEAEREKLKDTAFEDLLRGAQEAIVIPPWVALAIRPRPGVWEYVRVNVSELGVEELSVPEYLQFKEQLVNESTNNNFVLELDFGPFNASFPRPSLSKSIGNGVQFLNRHLSSKLFHDKESMYPLLNFLRAHNYKGMTMMLNDRIRSLSALQDALRKAEKHLSGLPADTPYSEFHHRFQELGLEKGWGDCTQRAHETIHLLLDLLEAPDPSTLEKFLGTIPMVFNVVILSPHGYFAQANVLGYPDTGGQVVYILDQVRAMENEMLLRIKQQGLDITPKILIVTRLLPDAHGTTCGQRLEKVLGTEHTHILRVPFKTEDGIVRKWISRFEVWPYLEAYTDDV…	0.976	0.972	0.99	1.014	0.994	1.026	0.88, 0.99, 1.1, 0.87, 1.04	0.93, 0.99, 1.06, 0.76, 1.12	0.99, 0.95, 1.12, 0.87, 1.02	1.13, 0.96, 1.01, 0.99, 0.98	1.06, 1.0, 0.96, 0.87, 1.08	1.07, 0.96, 1.05, 1.14, 0.91	0.0447884	0.0619193	0.0411096	0.0300998	0.0376298	0.0408167
p14197	TPM=44.4 Putative ortholog: Os11g32240 cytochrome P450 51, putative, expressed comp2774_c0_seq1_g83	FQQYFAEAVEEQK, YE[IL]EH[IL][IL][IL][IL]TASR, [IL]AE[IL]FST[IL][IL]K, [IL]GPVFTVP[IL][IL]TR	4	PPTIPAAPVVGGLLRFLKGPIPLIRAEYARLGPVFTVPILTRRITFLIGPEVSGHFFKGNESEMSQQEVYRFNVPTFGPGVVFDVDYLVRQEQFRFFTEALKSTKLRSYVDMMVAEAEEYFSKWGESGTVDLKYELEHLIILTASRCLLGREVREKLFDDVSALFHDLDNGMIPISVIFPYLPIPAHRKRDQARARLAEIFSTIIKSRKASGQSEEDMLQCFIDSKYKNGRSTTETEVTGLLIAALFAGQHTSSITSTWTGAYLLKFQQYFAEAVEEQKRVMKRHGDKIDHDILAEMDVLYRCIKEALRLHPPLIMLLRQSHIDFSVTTREGKEYDIPKGHIVATSPAFANRLPHIFKNPDSYDPDRFAPGREEDKAAGAFSYIAFGGGRHGCLGEPFA…	0.9775	1.0475	1.0075	1.0325	1.0775	0.965	0.89, 0.95, 1.04, 1.03	1.03, 1.01, 1.15, 1.0	0.93, 1.09, 0.97, 1.04	1.04, 1.15, 0.93, 1.01	1.16, 1.07, 1.11, 0.97	0.9, 1.08, 0.84, 1.04	0.0354436	0.0347311	0.035678	0.0455293	0.0402854	0.0567891
p59624	TPM=374.58 comp363_c0_seq1_g1230	FQSHFSEY[IL]K, G[IL]SADEMEA[IL]YK	2	HRKYIYGGHVADYMRSLAEEEPEKFQSHFSEYIKKGISADEMEAIYKKVHAAIRADPSMAKSTKEQPKTHKRYNLKKLTYDERKASLVQRLNALNSSAAADVDDDEDDE	1.005	0.975	1.005	1	0.98	1.045	1.06, 0.95	0.85, 1.1	1.02, 0.99	0.96, 1.04	0.8, 1.16	1.2, 0.89	0.055	0.125	0.015	0.04	0.18	0.155
p7051	TPM=165.72 Putative ortholog: Os10g17280 ATP synthase gamma chain, putative, expressed comp918_c0_seq1_g65	FQSV[IL]SFQPTMAT[IL][IL]SPEVMEK, G[IL]CGG[IL]NSTSVK, G[IL]WQPFTA[IL][IL]GDAPSVDVK, KNV[IL]VA[IL]TSDK, NP[IL]NYTQVAV[IL]ADD[IL][IL]K, VGD[IL]DSYE[IL]EGGETK	6	FSEKEPAALSLLVVGKSLGLLPIPTPELPTLDFLRRNRRTQHHLQPRIRKKQRGTAPPAMAMAATLRRKGSQALFSAPSQVAASMAARPAAPQPELALLGARSVSTQIVRTRMKSVKNIQKITKAMKMVAASKLRAVQTRTENSRGLWQPFTALLGDAPSVDVKKNVIVAITSDKGLCGGINSTSVKVSKALLKMTSGPEKETKYVILGEKGKVQLIRDSRKHIEMTVSELQKNPINYTQVAVLADDILKNVEYDAIRVVFNKFQSVISFQPTMATILSPEVMEKESESGGKVGDLDSYEIEGGETKSEILQNLTEFQFSCVMYNAVLENGCSELGARMSAMDSSSRNAGEMLDRLTLTYNRTRQASITTELTEIISGASALEG	1.00167	1.13667	1.03833	1.04	1.13667	0.916667	0.97, 1.12, 1.01, 1.09, 0.98, 0.84	0.98, 1.28, 1.14, 1.3, 1.07, 1.05	0.9, 1.16, 1.15, 1.07, 0.99, 0.96	0.93, 1.04, 1.13, 0.99, 1.01, 1.14	1.01, 1.15, 1.12, 1.2, 1.09, 1.25	0.92, 0.9, 1.01, 0.83, 0.93, 0.91	0.0406134	0.052831	0.0431599	0.0334664	0.0344158	0.0236173
p20302	TPM=10.37 Putative ortholog: Os06g20090 NUP155, putative, expressed comp7453_c0_seq1_g592	FSAVDP[IL]VDMV[IL]DEER, GD[IL]PTQH[IL][IL]PR, [IL][IL]YAEDS[IL][IL]SNAVSEK	3	ELLLQPLPEYVISTDGVTMTCITCTDKGQIFLSGRDGHIYELQYTTGSGWRKRCRKVCLTTGLGSLLSRWVLPNAFKFSAVDPIVDMVIDEERNTIYARTEGMKLQLFDLGASGDGPLKKITEEKNLVDPRDAPYGGRRPNAPRAARSPKPSIVCISPLSAMESKWLHAVAVLSDGKRLFISTSGGSSSSVGLNTGLQRPSCLKIVATRPSPPLGVGGGLTFGAVSAAGRAQPEDLALKVESAFYSAGALIMSDSSATAMSSLLAVQKDSAAQLSLPSTFATASRSSRALRETVSALPVEGRMLCASDVFPLPDAAFIMQSLYADVECLSAFSKPSEKTSIKLWAKGDLPTQHILPRRRIVVFNTMGLMEVVFNRPVDILRKLFDGNTLRSQIEEFFNR…	0.97	0.926667	0.933333	0.963333	0.96	1.00667	1.09, 0.9, 0.92	1.0, 0.9, 0.88	1.05, 0.85, 0.9	0.97, 0.94, 0.98	0.92, 1.0, 0.96	1.05, 0.94, 1.03	0.0602771	0.0371184	0.0600925	0.0120185	0.023094	0.0338296
p76201	TPM=15.37 comp7839_c0_seq1_g1243	FSAVSV[IL]VQDR, [IL]DTVTFNSGYNAAK	2	AIRLVGTVGAPVQLQRLPDGRFSAVSVLVQDRRTDFPKFWIPVIFQDDLAQIAASHLQENDLVYVSGQLTGDVPPFKHADGQANIQVLANLLSFVDSKAVATDVMVDEEEGFKEIAEAEKKVEPTKVIPKSPRRQTFSEFKAKQDKFKELWNDVLASPLDWIDNRPAKANGSKNPKYPDFKNKISEDALWLDSAPTHVLEKLDTVTFNSGYNAAKTYKPANYSMGRASNTSWGNKSKTSQAASPEKLQKEADLLKDLVDNPQKWWDNRIDKRSPKAPDFKHKDTGEAIWLNTRTPSWVTDALPPAKASMGSKGGRRPETLLS	0.94	0.935	0.96	1.02	0.995	1.025	0.92, 0.96	0.88, 0.99	0.92, 1.0	1.0, 1.04	0.96, 1.03	1.04, 1.01	0.02	0.055	0.04	0.02	0.035	0.015
p84100	TPM=30.09 comp10526_c0_seq2_g594	FSGAVPPE[IL]GR, HD[IL]ADP[IL]GY[IL]R	2	MPLLLLRPSSHRTAAPLLLLLHCCFTTLLFPPLASAAHRHATGDGIVISEADRQGLQAIKHDLADPLGYLRSWNDTGLGGACSGHWTGIKCVNGNVVAITLPWRGLAGTLSARGLGQLVQLRRLSLHDNAIAGAIPASLGFLPDLRGLYLFNNRFSGAVPPEIGRCLALQSFDASANLLTGAVPPALANSAKLIRLNLSRNALSGDLPAELAASASLLFLDLSHNTLSGPIPDAFAGDSKAPSSSSSTSRKESITGTYQLLFLSLAHNSLHGPVPQSLSRLTKLQNLDLAGNNLNGTIPENLAALPDLK	0.955	0.9	0.945	0.99	0.94	1.06	0.93, 0.98	0.81, 0.99	0.97, 0.92	1.04, 0.94	0.87, 1.01	1.19, 0.93	0.025	0.09	0.025	0.05	0.07	0.13
p5541	TPM=11.67 TMHMM=1 SignalP=yes Putative ortholog: Os07g48920 aldehyde dehydrogenase, putative, expressed comp7733_c0_seq1_g272	FSSDEEV[IL]Q[IL]ANDSK, Y[IL]GYFPA[IL]TPDEVR, [IL]QN[IL]VNDA[IL]DK, [IL]TW[IL][IL]DEGEK	4	MAFWWPLLVLAAAYALCRVLLLLIPPTVPSMEVDASDVLEEVNQNKEDSFIYIPRKGKAAQTDKVRCYEPATMKYLGYFPALTPDEVREHVAQASKAQKIWSKSSFKQRRQFLRILLKYILEHQDLICEISSRDTGKTMVDASLGEIMTTCEKITWLLDEGEKWLKPEYRACGRSMLHKRAKVEFYPLGVIGAIVSWNYPFHNVFNPMLAAVFSGNAAVIKVSEHASWSGCFYYRIIQAALLAVGAPDNLVHIITGFGETGQALVSSVDKIIFVGSPGVGRMIMQKASETLIPVTLELGGKDAFIVCEDVDLPNVVQVAVRAALQSSGQNCAGAERFYVHKDIYPTFVSRVVKIIKSISVGPPLSGRYDMGAICMIEHSERLQNLVNDALDKGAEIAGR…	0.9775	1.0225	1.0725	1.0975	1.0475	1.05	0.98, 1.03, 0.91, 0.99	1.03, 1.02, 0.98, 1.06	1.17, 1.11, 0.96, 1.05	1.2, 1.08, 1.05, 1.06	1.05, 1.0, 1.07, 1.07	1.14, 1.09, 0.98, 0.99	0.0249583	0.0165202	0.0447912	0.0347311	0.0165202	0.0389444
p16742	TPM=39.34 Putative ortholog: Os01g40570 outer mitochondrial membrane porin, putative, expressed comp4181_c0_seq1_g528	FT[IL]TTCTPEGVA[IL]TAAGTR, NEST[IL][IL]FGSQHS[IL]DPR, S[IL][IL]T[IL]SGEVDTK, VG[IL]S[IL]V[IL]KP, [IL]NES[IL]FGE[IL]QTQ[IL]K	5	GQDLPRLHFNSSPRPPSSAAAISLPALASRPPGRPLSPTPPAAMAPGLYTDIGKKTRDLLYRDYCTHQKFTLTTCTPEGVAITAAGTRLNESIFGELQTQLKTKNLTVDIKTNSESDLLTTVTVDGLGTPGLKSILSLVVPDQRSGKLDFLYLHELAGLNASVGLNPNPMVNLSGVFGSKELSVGVDVSFDTATSNFTKYNAALSLTNQDLIASLHLNNHGDTLTASYFHLVKQHSATAVGAELSHSFSRNESTLIFGSQHSLDPRTTVKARFNNYGMASALVQHEWRPKSLITISGEVDTKAIEKSTKVGLSLVLKP	1.052	1.04	1.024	0.976	0.996	1.004	1.35, 0.99, 1.02, 0.93, 0.97	1.28, 0.75, 1.05, 1.0, 1.12	1.26, 1.01, 0.94, 0.92, 0.99	0.94, 1.02, 0.92, 0.98, 1.02	0.95, 0.76, 1.04, 1.07, 1.16	0.99, 1.34, 0.89, 0.92, 0.88	0.075921	0.0865448	0.0612046	0.0203961	0.0678675	0.0861742
p5363	TPM=129.53 TMHMM=9 Putative ortholog: Os06g44140 transmembrane 9 superfamily member, putative, expressed comp722_c0_seq1_g556	FV[IL]NSETPQEVEVGK, VNMV[IL]DN[IL]P[IL]VVPVQR	2	VALAALCLLVAPAAGFYLPGVAPTDFAKGDELMVKVNKLTSIKTQLPYTYYSLPFCKPSTIVDSSENLGEVLRGDRIENSPYAFQMREPKMCQIVCKLTVTEKEAKELKEKIEDEYRVNMVLDNLPLVVPVQRQDKNTIAYQGGYHVGVKGQYSGSKEEKHFIHNHLSFLVKYHKDEESELSRIVGFEVKPFSIKHQFDGKWNDAITRLSTCDPHDSKFVINSETPQEVEVGKDIIFTYDVRFEESEVKWASRWDTYLLMSDDQIHWFSIVNSLMIVLFLSGMVAMIMMRTLYRDISRYNQLETQEEAQEETGWKLVHGDVFRPPVNSDLLCVYVGTGVQFFGMLLVTMIFAVLGFLSPSNRGGLMTAMLLVWVLMGLLAGYSSSRLYKMFKGSEWKQI…	1.2	1.26	1.075	0.895	1.055	0.855	1.28, 1.12	1.3, 1.22	1.13, 1.02	0.88, 0.91	1.02, 1.09	0.87, 0.84	0.08	0.04	0.055	0.015	0.035	0.015
p17742	TPM=29.78 Putative ortholog: Os04g35290 OsPDIL5-2 protein disulfide isomerase PDIL5-2, expressed comp6037_c0_seq1_g214	FVAPDVSV[IL]ESDTA[IL]K, [IL]EEGDQASQ[IL]SQF[IL]EGYR	2	YAPWCGHCKRLAPELDEAAPVLAGLSEPIMVAKVNADKYRKLGSKYGVDGFPTLMLFIHGVPIEYTGSRKADLLVRNLKKFVAPDVSVLESDTAIKSFVENSGTSFPMFIGFGVNESLIAEYGGKYKKRAWFAVAKDFSEDLMVTYDFNKAPALVAVHPKYKEQNVFYGPFEGHFLEDFIKQSLLPLTVPINTETLKLLDDDDRKVVLAILEDDSDENSTQLVKVLRSAANANRDLVFGYVGVKQWEEFVETFDVSKSSQLPKLIVWDRNEEYEQVEGSERLEEGDQASQISQFLEGYRAGRTIKKQVSGPSFMGFMHSLMILLSQDEITLSDGSWVSFFAPKDYRPGDLALRFYCTLSAAVVSTEEGQVSAVACDVHRICADCVAIMRSCIFCPSIGC…	1.08	0.935	1.035	0.96	0.86	1.115	1.12, 1.04	1.04, 0.83	1.1, 0.97	0.98, 0.94	0.92, 0.8	1.06, 1.17	0.04	0.105	0.065	0.02	0.06	0.055
p42193	TPM=8.31 TMHMM=1 SignalP=yes comp14060_c0_seq2_g931	FVDGPTEYGVGHDDFR, S[IL]AEAHGPVM[IL][IL]R, [IL]HAP[IL]P[IL][IL][IL]PR, [IL]MDG[IL][IL]EQV[IL]ADHR	4	MDVSSPVAFLHSPFLIPVFTLFVSIFSFLLFFTKKSRPFGSNGGKRLPPSPWGLPILGHLPLLGPLPHRKLRSLAEAHGPVMLLRLGGVPTIVASSAAAAQEAMKTRDLAFASRPSVRMAERLLYGHDMAFAPYGEYWRQARRVCVLHLLSARRVASFGRVREQEVAALLDRVRRVACASAGSRPDGDNAVVNLTDELISYTNAVISRATFGDDGGYGINGGLAEVFADFEELLGTATVGEFVPWLAWVDTLMGLDAKAARMSKIMDGLLEQVIADHRQRRLSGGRRIGDGEEDHRDFVDVLLDVSEAGEDAGGIQIDTVGIKAIVLDVFAAATDTTYTTLVWAMAELINHPTEMRKLQDEIRATVIGNGTNHMNGDDLSKLHYLRAVIKETLRLHAPL…	0.985	1.0125	1.015	1.0325	1.0325	1	0.92, 0.97, 1.06, 0.99	1.01, 1.05, 1.02, 0.97	1.09, 1.06, 1.04, 0.87	1.18, 1.09, 0.98, 0.88	1.1, 1.08, 0.97, 0.98	1.08, 1.01, 1.01, 0.9	0.0290115	0.0165202	0.0494132	0.0652399	0.0335099	0.0371932
p12551	TPM=32.98 Putative ortholog: Os05g44770 receptor-like protein kinase 5 precursor, putative, expressed comp3190_c0_seq1_g402	FVDTEGDDFH[IL]PEGR, M[IL]SGMY[IL]GE[IL]VR, SDK[IL]P[IL]SEYDK, SGNMV[IL]NTEWGSFK, TVVA[IL]DGG[IL]YEHYK	5	RQKRAAELHGAAEAERKRKVADVIEEVERALSTPTALLRSISDALVAEMERGLRGDIHSQLKMLISYVDNLPTGDEHGLFYALDLGGTNFRVLRVQLAGREKRVAKQQSEEVSIPPHLMVGTSMELFDFIAAALAKFVDTEGDDFHLPEGRQRELGFTFSFPVNQLSISSGTLIKWTKGFSINGTVGEDVVAELSKAMERQGLDMKVSALVNDTVGTLAGGRYVDNDVVAAVILGTGTNAAYVEHANAIPKWTGLLPKSGNMVINTEWGSFKSDKLPLSEYDKAMDFESLNPGEQIYEKMISGMYLGEIVRRILLKLAHDAALFGDVVPPKLEQPFVLRTPDMSAMHHDASHDLKVLGTKLKDIVGVADTSLEVRYITRHICDIVAERGARLAAAGIYG…	0.966	1.022	1.016	1.046	1.058	0.994	0.98, 0.91, 1.06, 0.9, 0.98	0.87, 0.97, 1.24, 1.0, 1.03	0.92, 0.92, 1.24, 0.95, 1.05	0.93, 1.01, 1.16, 1.06, 1.07	0.89, 1.06, 1.17, 1.11, 1.06	1.05, 0.95, 1.0, 0.96, 1.01	0.0289137	0.0607783	0.0608769	0.0377624	0.0466262	0.0180555
p7576	TPM=132.82 Putative ortholog: Os06g03660 peroxisomal biogenesis factor 11, putative, expressed comp1388_c0_seq1_g1273	FVND[IL]QA[IL][IL]SPPPK, GTP[IL]P[IL][IL][IL][IL]GK	2	CFARGVWYCTSLSQSLDLARPAHRGKGDLIEAAAAAAADLLHTAEARDKICRAIQYGSKFLSNGQPGPAQNVDKSTSLARKVFRLFKFVNDLQALISPPPKGTPLPLILLGKSKNAMLSTFLFLDQIVWAGRTGIYKNKERAEFLGRIAFYCFLGSNTCTTIIELAELQRLSKSTKKLEKELKGQELYKNEQYRMKLKKSNERLLALIKSSLDIVVAVGLLQLAPKKVTPRVTGAFGFASSLIACYQLLPAPAKSK	0.995	1.105	1.075	1.08	1.11	0.97	1.01, 0.98	1.04, 1.17	1.06, 1.09	1.05, 1.11	1.03, 1.19	1.01, 0.93	0.015	0.065	0.015	0.03	0.08	0.04
p14652	TPM=33.16 Putative ortholog: Os01g68390 Uncharacterized ACR, COG1565 containing protein, putative, expressed comp4496_c0_seq1_g24	FY[IL]SVPTHNK, SGPVGV[IL]DSA[IL]R	2	PPPPHAAGSAMAPAYLATVPALRRVARWAPVALFSSGIVAGDKPVLVRDFVKSALYDPNHGYFSKRSGPVGVLDSAIRFNQLQGRSAYMKHLDKLYKKHDISWFTPVELFKPWYAHAIAASILRTANLSVPLKIYEIGGGSGTCAKGVLDYMMLNAPPKVYNNMKYISVEISSSLAEKQLETVGEVQSHLSKFTVEHRDATDRSGWGSKDPQPCWVLMLEVLDNLPHDLVYSPNQVSPWMEVWIEKVNGSSQVCEVYKPLQDPLVSRCNEIVSMNEQDPSLREKLSFAAKGIFSKVFPKPRRSWLPTGCLKLLDTLHEALPSMSLIASDFSYLPDVSIPGDRAPLVSSKKDGKTLDHNNYLDAQGDADIFFPTNFWLLEQIDHHCSGFSREQKNRGAFK…	1.005	0.995	1.07	1.06	0.99	1.07	0.95, 1.06	0.96, 1.03	1.0, 1.14	1.05, 1.07	1.01, 0.97	1.04, 1.1	0.055	0.035	0.07	0.01	0.02	0.03
p56656	TPM=432.7 comp406_c0_seq1_g874	G[IL][IL]GE[IL][IL]SR, [IL][IL]GATNP[IL]ASEPGT[IL]R	2	MMKVCSLPTAPTSQLKSQALSSSSTSQQHLSAAMAEQTFIMIKPDGVQRGLIGEIISRFEKKGFYLKGLKLQNVEKSFAEQHYADLSSKPFFGGLVEYIVSGPVVAMVWEGKSVVATGRKIIGATNPLASEPGTIRGDFAVDIGRNVIHGSDSVENARKEIALWFPEGLAGWTSSQHNWIYEA	1.085	0.94	0.945	0.87	0.865	1.005	1.06, 1.11	0.96, 0.92	0.91, 0.98	0.86, 0.88	0.9, 0.83	0.95, 1.06	0.025	0.02	0.035	0.01	0.035	0.055
p13451	TPM=78.39 Putative ortholog: Os11g48040 mitochondrial carrier protein, putative, expressed comp2168_c0_seq1_g1159	G[IL][IL]GTATT[IL]AR, NA[IL][IL]NAAE[IL]ASYDQVK, QEGFAA[IL]WTG[IL]GPNVAR, [IL]G[IL]YEPVK	4	MAPDHGSKVDISFAGRFTASAIAACFAEITTIPLDTAKVRLQLQKKAVAGDLAGPKYRGLLGTATTIAREEGAAALWKGIVPGLHRQCIYGGLRIGLYEPVKAFYVGENHVGDVPLYKKIAAGFTTGALAIAVANPTDLVKVRLQSEGKLAPGVPRRYTGAMNAYSTIVRQEGFAALWTGIGPNVARNAIINAAELASYDQVKQSILKLPGFKDDVVTHILSGLGAGFFAVCVGSPVDVVKSRMMGDSAYTSTIDCFVKTLKNDGPLAFYKGFLPNFARLGSWNVIMFLTLEQVQKAFVRKPAN	0.9525	1.01	1.0025	1.0475	1.06	0.9975	0.95, 1.03, 0.89, 0.94	0.96, 1.18, 0.86, 1.04	0.99, 1.15, 0.96, 0.91	1.04, 1.12, 1.07, 0.96	1.02, 1.14, 0.97, 1.11	1.03, 0.98, 1.11, 0.87	0.0289756	0.0675771	0.0518612	0.0335099	0.03937	0.0502286
p9702	TPM=2115.5 Putative ortholog: Os02g38920 glyceraldehyde-3-phosphate dehydrogenase, putative, expressed comp10_c0_seq1_g1158	G[IL][IL]GYVDED[IL]VSTDFQGDSR, [IL]VSWYDNEWGYSTR	2	KPGSSHPTDRSSHLLGREGSQLGAAIPHRMFPSRDYRNPKKSSSGPGFPTFASSRHTHRNLLEPIAAPLPGPTCHPPRPPIPRYRKTEGDAHPAGPTTTARTPLYKPLPRRSHRHLHPPSRSPICFSSHQILRPPVSASPMAPIKIGINGFGRIGRLVARVALQCPDVELVAVNDPFITTDYMTYMFKYDTVHGQWKHHEVKVKDAKTLLFGEKEVAVFGCRNPEEIPWASAGADYVVESTGVFTDKDKAAAHIKGGAKKVIISAPSKDAPMFVMGVNEKEYTSDITIVSNASCTTNCLAPLAKVINDKFGIVEGLMTTVHAMTATQKTVDGPSSKDWRGGRAASFNIIPSSTGAAKAVGKVLPVLNGKLTGMAFRVPTVDVSVVDLTVRLEKAATYDQ…	0.94	0.86	0.9	0.945	0.9	1.045	1.1, 0.78	1.05, 0.67	1.11, 0.69	1.01, 0.88	0.95, 0.85	1.06, 1.03	0.16	0.19	0.21	0.065	0.05	0.015
p11220	TPM=53.25 Putative ortholog: Os03g61600 phosphoribosylformylglycinamidine synthase, putative, expressed comp2794_c0_seq1_g399	G[IL]AH[IL]TGGGFTDN[IL]PR, [IL]DVD[IL]AEK	2	MGAARLLHLVRTPATSPAPAARPGGHPQPHNYVRLPQSAAAGMRRVAVSCSGSGSGSADEEGMTYKGAGVDIDAGTELVRRIRKMAPGIGGFGGLFPHGDEFLVAGTDGVGTKLKLAFETGIHDTIGIDLVAMSVNDIVTSGAKPLFFLDYFATSRLDVDLAEKVIKGIVEGCQLSNCILLGGETAEMPDFYQEGEYDLSGFAVGAVKKDKVIDGKNIVEGDVLIGLPSSGVHSNGFSLARRVLERSGLSLTDPLPRNDGVTTTVGEALMAPTVIYVKQVLEIISKGGVKGLAHITGGGFTDNIPRVFPKGLGAKIVTGSWEVPPVFKWLQQVGKIEDAEMLRTFNMGVGMVLVVSKDAADRILAESSPAYRIGEVIQGEGVHYA	0.95	0.945	0.97	1.025	0.995	1.025	0.97, 0.93	0.91, 0.98	0.92, 1.02	0.95, 1.1	0.94, 1.05	1.01, 1.04	0.02	0.035	0.05	0.075	0.055	0.015
p610	TPM=101.27 TMHMM=1 SignalP=yes Putative ortholog: Os02g38440 oxidoreductase, short chain dehydrogenase/reductase family, putative, expressed comp1217_c0_seq1_g144	G[IL]DVGV[IL]VNNAG[IL]SYPYAR, S[IL][IL]QVNVEAVTR, YFHEVDQE[IL]MR, [IL]AASG[IL]S[IL]V[IL]VGR, [IL]AAVADE[IL]R, [IL]THAV[IL]PGMVER	6	PAPIHQDPAAPTHSAITLSPLRTASATPLLFPPTMAGTCAHVEFLRAQPWWALALAAVGLLVALRAALRLALWAYAFFLRPGKPLRRRYGPCAVVTGGTDGIGRAIAFRLAASGLSLVLVGRSPDKLAAVADEIRAKHPKAEVRTFVLDFACEGLAAGVDALKDTLRGLDVGVLVNNAGLSYPYARYFHEVDQELMRSLIQVNVEAVTRITHAVLPGMVERKRGAIVNIGSGAASVVPSDPLYSVYAATKAYVDQFSRCLYVEYKGKGIDVQCQVPLYVATKMASIRKSSFLVPSADTYARAAIRHIGYEPRSTPYWPHSVVWFFISLLPESLVDSMRLSMCIKIRKKGQAKDAKKKAQ	0.988333	0.94	1.005	1.02	0.951667	1.07	1.07, 1.03, 0.94, 0.95, 0.97, 0.97	1.03, 0.89, 0.85, 0.93, 0.95, 0.99	1.17, 0.96, 0.93, 1.06, 0.95, 0.96	1.1, 0.93, 1.0, 1.12, 0.98, 0.99	0.97, 0.86, 0.91, 0.98, 0.97, 1.02	1.13, 1.08, 1.1, 1.14, 1.0, 0.97	0.020723	0.0267083	0.0378374	0.0302214	0.0232976	0.028519
p2444	TPM=56.05 SignalP=yes Putative ortholog: Os06g10770 peptidase, putative, expressed comp2283_c0_seq1_g316	G[IL]EVYQH[IL][IL]R, [IL]AKPE[IL][IL]SSTTDAR	2	AEPVTTTAAMFHLHHFLLVAVLLAAVPHPAHPLTELESSQIRRFQDYLRIRTAHPTPDYAGAAAFLLPYAASLGLGTTTLHFTACKSKPLLLLTWPGSDPSLPSILLNSHIDSVPAEPEHWIHPPYAAHHDPATGRVYARGAQDDKCLPIQYLEAIRGLQAAGFAPARTVHVSLVPDEEIGGEDGHEKFVQSDEFRALNVGFMLDEGQASPTDEYRVFYADRLVWKLIVKATGAPGHGSKMFDGAAVGNLMDIIETVAGFREAQFGKVKAGMSGPGEVVSVNPVYMNAGTPSPTGFVMNMQPSEAEVGFDLRLPPTEDIEQIIRRIKEEWAPAHKNLTYQLMMKGPVRDVAGRPLVTLTNESNPWWSVFEQAIISSGGKLAKPEILSSTTDARFVRQMG…	0.985	0.925	0.92	0.94	0.94	0.995	1.03, 0.94	0.87, 0.98	0.88, 0.96	0.86, 1.02	0.84, 1.04	1.01, 0.98	0.045	0.055	0.04	0.08	0.1	0.015
p15852	TPM=43.77 Putative ortholog: Os08g40110 peptidase, putative, expressed comp4277_c0_seq1_g1452	G[IL]G[IL]YEY[IL][IL]K, VSV[IL]DNFGK, [IL]GKPE[IL]FPASTDAR, [IL]PPSVHTEA[IL]ER	4	EPAAGKPLLLLRWPGRRPALPSILLNSHTDVVPSEPKKWEHGPFSAALDEASGRIYARGSQDMKCVGMQYLEAIRRLRDAGFVPDRNIYITFVPDEEIGGHEGVEPFVASKEFKELNVGLVLDEGLASPGEEYRVFYAERSPWWLTIKAKGAPGHGAKLYDGSAMENLMKSVEAIRRFRTAQFDLVKSGEKSEGDVVSVNFAYLKAGTPTPTGFVMNLQPSEAEVGIDIRIPPSVHTEALERRLVEEWAPASRNLSFEFKQKVSVLDNFGKPAMTTADSSNPWWPVFEEAVKRAGGKLGKPEIFPASTDARYFRELGIPAFGFSPMANTPILLHDHNEFLSKDEYLKGIGIYEYIIKALATHKDDTIDSESRAEL	0.9825	1.0075	1.015	1.045	1.0375	1.0425	0.92, 1.01, 0.9, 1.1	1.07, 1.22, 1.03, 0.71	0.97, 1.08, 1.08, 0.93	1.05, 1.08, 1.2, 0.85	1.16, 1.21, 1.14, 0.64	0.91, 0.89, 1.05, 1.32	0.0458939	0.107267	0.0384057	0.0726292	0.133315	0.0991106
p2206	TPM=52.77 TMHMM=2 SignalP=yes Putative ortholog: Os01g67870 expressed protein comp2109_c0_seq1_g1239	G[IL]GEHN[IL]QNWK, [IL]HNQ[IL][IL]GVEK	2	MAAMEAAADAMLAAASRAFCSSVAVYFQIQGCCIALLLALGWALASFVRKREIRKMRRKMANGHSFAFLCDDIDELEHSVQERLPRVSVIMPLKGLGEHNLQNWKTQITSLYGGPLEFLFVVESQDDPAYRAVSRLIVDYKDKLEAKVVVAGFSTTCSQKIHNQLIGVEKMHKDTKYVLFLDDDVRLHPGTVGALTKEMEKRPEIFIQTGYPLDLPSGSLGSYCIYEYHMPCSMGFATGGQTFFLWGGCMMMHADDFRQDLYGLVTGLKNGGYSDDMTLAAIAGQHKRLIWSPPVAVFPHPLASDLSFSRYWNYLRKQTFVLESYVSKVNWIMNRALFGVHCYLSWGFVCPYVMALVHIATTLRAPYSGIVKEAAESSCGLKLVSFLLVCTLTELVSMW…	1.02	1.12	1.05	1.04	1.105	0.94	0.96, 1.08	1.16, 1.08	1.08, 1.02	1.13, 0.95	1.21, 1.0	0.93, 0.95	0.06	0.04	0.03	0.09	0.105	0.01
p5559	TPM=146.53 TMHMM=1 Putative ortholog: Os07g10830 dolichyl-diphosphooligosaccharide--protein glycosyltransferase 48 kDasubunit precursor, putative, expressed comp780_c0_seq1_g7	G[IL]GHAVNPSNS[IL]V[IL]K, K[IL]EAPV[IL]FR, V[IL]SASPSAYSANPK, V[IL][IL]SGS[IL]D[IL]FSNR, YGQY[IL]YDG[IL]V[IL]FAPSTPR, [IL]ASPPS[IL]TGSG[IL]S[IL]VS[IL]MQAR, [IL]GYTGVS[IL]AK, [IL][IL]V[IL]VDD[IL]AVR	8	MAALRLLLLLAAATLLVVASRGDASGAGPRGRKLLVLVDDLAVRSSHSAFFGSLQARGLDLEFRLADDPKLSLHRYGQYLYDGLVLFAPSTPRFGGSVDQNAVLEFIDAGHDMILAADSSASDLIRGIATECGIEFDEDPEAMVIDHINYASTDVEGDHTLIAGDDLIQSDVILGSKKIEAPVLFRGIGHAVNPSNSLVLKVLSASPSAYSANPKTKLASPPSLTGSGISLVSIMQARNNARVLISGSLDLFSNRLLKSGVKKAGSKTRHEKAGNQQFVTETSKWVFHERGHLKAVNVAHHKVGETNEPSMYRINDDLEYSVEIYEWSGTSWKPYVADDVQIQFYMMSPYVLKNMSTDKKGLYSTSFKVPDVYGVFQFKVEYQRLGYTGVSLAKQIPVR…	1.05625	1.03375	0.9975	0.94625	0.98125	0.96875	1.06, 1.06, 0.95, 1.09, 1.23, 1.08, 1.02, 0.96	1.02, 1.19, 0.97, 0.97, 1.13, 0.93, 1.07, 0.99	0.98, 1.05, 0.93, 1.05, 1.15, 0.98, 0.89, 0.95	0.93, 0.99, 0.99, 0.96, 0.94, 0.9, 0.87, 0.99	0.96, 1.12, 1.02, 0.89, 0.92, 0.86, 1.05, 1.03	0.96, 0.88, 0.97, 1.08, 1.02, 1.05, 0.83, 0.96	0.0309918	0.0316192	0.0292007	0.0159169	0.0313641	0.0295464
p13015	TPM=39.99 Putative ortholog: Os03g14900 NB-ARC/LRR disease resistance protein, putative, expressed comp2807_c0_seq1_g137	G[IL]P[IL]F[IL]AT[IL]GR, [IL][IL]A[IL]PME[IL]SN[IL]SQ[IL]K, [IL][IL]A[IL][IL]G[IL]PK, [IL][IL]GGVADGGSPAGE[IL][IL]TFPR	4	LGVWGAGGVGKTTLLRQVRDVCGRVAPFFDHVFLVAASRDCTVADLQSEVVAVLGLREAPTEQAQAAGILSFLRDKSFLLLLDGVWERPDLERVGIPQPFGVVAGRVRKVIVSSRSEAVCADMGCRNKIKMECMNEEDAWSLFEANVGEEAIRGSTQISTLARQVAEECKGLPLFLATIGRAMSNKRTPEEWGNALDKLKKSQLMSTTPGSDKSTQALVKFCLDNLESDTVRECLLTCALWPEDHNISRDELVQCWIGLGLLPNHNDVDEALRFGHTVVSVLESSRLLEQGDNHRYNMSPSDTHVRLHDVVRDAALQLAPGKWLVRAGVGLREPPRDEALWRDAQRVSLMHNVIEEAPAKAGGALSDAHPASLMLQCNHALPRKMFQAIQHFTTLTYLD…	0.995	1.0025	0.98	0.985	1.005	0.9875	1.01, 0.96, 0.99, 1.02	0.98, 1.05, 1.07, 0.91	1.07, 0.89, 0.9, 1.06	1.07, 0.93, 0.9, 1.04	0.97, 1.09, 1.07, 0.89	1.1, 0.85, 0.84, 1.16	0.0132288	0.0363719	0.0491596	0.041332	0.0464579	0.0832041
p15694	TPM=27.51 Putative ortholog: Os01g66130 armadillo/beta-catenin repeat family protein, putative, expressed comp5290_c0_seq1_g1218	G[IL]PA[IL]VEVVE[IL]GSAR, TNYSSDASGEVADGGPSASS[IL]PQR	2	KLEDINYEHVFDLAKEVAMELTGRGTQSPANLPIISSALSLSTNLELYMEAVSLENLRTRAMRSDNRNELDLVEKMIPMVNYMHECLLRETQLLNINGVPIPADFCCPLSLELMSDPVILASGQTYERVYIKLWLDEGFTICPKTRQRLAHSNLIPNYTVKALISNWCESHDIKLPDPVKSLKLNFPSVAPFIQDLSATGNSPLHPSVVGRGNIPGSPEADLYMRSLNRASPPHSVAHQSSDAHVNRPGHEGSTNQPSEYANGSAPDIARLSLASSEARESSLEEIHAASNLQASEQSTEEASHLNGDTHDHLGSSSVNGSLPNSGQLDGDGDIDNGMMRVSSDRTNYSSDASGEVADGGPSASSIPQRENVILPRLGMRGQFVRRQASDRGFPRIISS…	1	1.03	1.08	1.075	1.035	1.045	0.97, 1.03	1.04, 1.02	0.97, 1.19	1.0, 1.15	1.08, 0.99	0.93, 1.16	0.03	0.01	0.11	0.075	0.045	0.115
p78017	TPM=26.13 comp8159_c0_seq1_g1331	G[IL]SMAVDDVVTN[IL]K, M[IL]STSEE[IL]AQVGT[IL]SANGER	2	MNAMDLRRGISMAVDDVVTNLKGMAKMISTSEEIAQVGTISANGEREIGELIAKAMEKVGKEGVITIADGNTLHNELEVVEGM	1.055	1.23	1.155	1.09	1.17	0.97	1.06, 1.05	1.44, 1.02	1.1, 1.21	1.03, 1.15	1.36, 0.98	0.76, 1.18	0.005	0.21	0.055	0.06	0.19	0.21
p4356	TPM=274.13 TMHMM=1 Putative ortholog: Os07g45320 COX VIIa, putative, expressed comp503_c0_seq1_g375	G[IL]YNMSHG[IL]GK, [IL]VQQQQYFQK	2	SEGYPQIPSLQIHPPPPATTVAARPHASPPARMTTEAPFYPREKIVQQQQYFQKLSKHTHLKGRYDVITSVAIPLALAGTSLFMIGRGIYNMSHGIGKKE	0.99	1.095	1.035	1.045	1.105	0.945	1.06, 0.92	1.17, 1.02	1.06, 1.01	1.0, 1.09	1.1, 1.11	0.9, 0.99	0.07	0.075	0.025	0.045	0.005	0.045
p13003	TPM=133.23 Putative ortholog: Os10g23100 ras-related protein, putative, expressed comp2367_c0_seq2_g121	GA[IL]GA[IL][IL]VYD[IL]TK, VV[IL][IL]GDSAVGK, V[IL]VPGPAQE[IL]PK	3	AYQPDPLSPFPLVFPVSFATLVEPKTQTPPRTLHSHALPPPPSLAHSSARHHHRRRRPARATPMAGGEKVDYVFKVVLIGDSAVGKSQILARFARNEFSLDSKATIGVEFQTRTLLIDHKSVKAQIWDTAGQERYRAVTSAYYRGALGALLVYDITKRQSFDHIPRWLEELRGHADKNIVIMLVGNKSDLEDERAVSTEDAKEFAEKENLFFLETSAMQATNVENSFQTVLSEIFKIHSKKNIAADPKVNGAAPSLAGKKVLVPGPAQEIPKSKCCSSM	0.96	1.06333	0.993333	1.03333	1.10667	0.936667	0.96, 0.87, 1.05	1.07, 0.91, 1.21	1.01, 0.9, 1.07	1.05, 1.03, 1.02	1.11, 1.05, 1.16	0.94, 0.99, 0.88	0.0519615	0.0866667	0.0497773	0.00881917	0.031798	0.031798
p55445	TPM=108.25 comp1310_c0_seq2_g219	GAAA[IL]QS[IL]RPVK, [IL]P[IL]GAPA[IL]MVSPQAER, [IL][IL]GVEY[IL]VSR	3	EESTPRPVQPARKLPDRSMASSDKKPLPTPASTGGDGGPPGKPTTMSTMMLDKGAAALQSLRPVKQINQHVCTFALYAHDPHRQVETHHYVSRLTQDVLQCPVYDSDDKNARLIGVEYIVSRKIFEALPKEEQRLWHSHAHEIKAGLWASPRVPELLEKTELDHMTGTFGKFWCTWQVDRGDRLPLGAPALMVSPQAERIATVLPDLVRKRDQKYGFSTEELKAARADVEVPADPRPGQADYWVRHHKGFALDVVPHEMKRHAPFP	1.03333	1.04667	0.993333	0.963333	1.01667	0.946667	1.03, 1.17, 0.9	1.1, 1.07, 0.97	1.07, 1.0, 0.91	1.04, 0.85, 1.0	1.07, 0.91, 1.07	0.97, 0.93, 0.94	0.0779601	0.0392994	0.0463081	0.0578312	0.0533333	0.0120185
p1783	TPM=72.66 TMHMM=1 Putative ortholog: Os07g42250 strictosidine synthase, putative, expressed comp1820_c0_seq1_g1403	GAMVAQVSESGE[IL][IL]R, VASSFPA[IL][IL]DV[IL]K, VSVV[IL]DN[IL]AFANGVA[IL]SR, VT[IL][IL]ASTVEGSP[IL]R, WV[IL]DFMEASSTGR	5	LATRPARQQRSQSQPVQSGNADAHATRIRACSPLDRCYVVPPAPALDVINGGLPACETSWNRSGQLTPSLAAASPSSQFRRRRSSLMAPGGLFGTAAVAVVVSLAVHVVLNCPIQPVPSPTPPSAAYPPNNLLQGLEKLGEGQLSGPEDVYVDAAAGGTLYTATRDGWLQRMQPNGTWERWRFVGGAGLLGIAPSADGSMLVCDADKGLLRVEEGRVTILASTVEGSPIRFADAAIEASDGTVYFSDGSARFGFDRWVLDFMEASSTGRLLKYDPGTGKVSVVLDNLAFANGVALSRDETFIIVCESWRFRCSKLWLKGDKSGQAETFIANLPGSPDNIHLAPDGSFWIALIQLRSPWIDLVTRWTFTKRVASSFPALLDVLKETGKGAMVAQVSESGE…	1.07	0.988	1.024	0.96	0.924	1.044	1.03, 1.05, 0.97, 1.08, 1.22	0.89, 1.1, 0.85, 1.11, 0.99	0.97, 1.02, 0.95, 1.11, 1.07	0.94, 0.97, 0.98, 1.03, 0.88	0.87, 1.04, 0.88, 1.02, 0.81	1.09, 0.93, 1.11, 1.0, 1.09	0.0415933	0.0529528	0.0299333	0.0246982	0.0450111	0.0342929
p70339	TPM=20.44 comp5035_c0_seq1_g1384	GANPA[IL]V[IL]NN[IL]YR, KVP[IL]NVFSA[IL]R, MNPNNFN[IL]QHR, TAAGTP[IL]VQ[IL][IL]S[IL]SDGEK, V[IL]EG[IL]SD[IL]RDESDR	5	LAVRERVVQVELHKEATEAYMSYAMSVLLGRALPDVRDGLKPVHRRILYAMHEMGLASRRPYRKCARVVGEVLGKFHPHGDSAVYETLVRMAQDFSMRYPLVQGHGNFGSIDADPPAAMRYTECRLDPLTEAMFLTDLELNTVDYVPNFDNSQKEPSLLPARVPSLLLNGSAGIAVGMATNIPPHNLGELVDALSVIIQNPEATLQELLECMPGPDFPTGGIIMGNDGILEAYRTGRGRVVVRGKTEMETIDKKSNRTAIIIKEIPYQQNKSTLVQRIAELVEDKVLEGISDIRDESDRSGMRVVIEVKRGANPAIVLNNLYRHTTLQSGFSCNMVAILNGHPKLMGLKEILQAFLDFRCSVIERRAKFKLSQALERKHIVEGIVIGLDNLDSVIQTIR…	0.996	0.99	1.014	1.02	0.994	1.03	0.96, 1.05, 0.97, 0.98, 1.02	0.91, 1.12, 0.87, 1.03, 1.02	1.08, 1.02, 0.95, 1.02, 1.0	1.12, 0.98, 0.99, 1.03, 0.98	0.95, 1.07, 0.9, 1.05, 1.0	1.18, 0.91, 1.1, 0.98, 0.98	0.0169115	0.044833	0.0208806	0.0266458	0.0314006	0.0483735
p49929	TPM=903.65 TMHMM=2 comp42_c1_seq1_g373	GDDYNYGGHGQSQGQGQNQAVAVT[IL]GK, GGAQGGGYAVGDDYMR	2	LSVQSSEGEVSASTTMAGEQGHHRGGAQGGGYAVGDDYMRAIRGDDYNYGGHGQSQGQGQNQAVAVTLGKGVAAAAAAGSMLFLSGLALTGTVVALVIATPVMVIFSPVLVPAAIAVALLTTGFVSSGALGAAAMGVLAWMYRYLSRGSSSPPGSDKVDHAGSKIDSKAHEVKNWAQQRMDQARTQ	0.95	0.885	0.895	0.95	0.94	1.015	0.86, 1.04	0.89, 0.88	0.84, 0.95	0.98, 0.92	1.03, 0.85	0.95, 1.08	0.09	0.005	0.055	0.03	0.09	0.065
p50200	TPM=319.48 TMHMM=1 SignalP=yes comp450_c0_seq2_g1410	GDPFEFT[IL]GSGQV[IL]K, GS[IL]TDGSVFDSSYDR, SADVTQ[IL]Q[IL]GVK	3	MGMKQRHLCLAVAAVAVAAILLTASAKKSADVTQLQIGVKYRPQSCTVQSHKGDKIKVHYRGSLTDGSVFDSSYDRGDPFEFTLGSGQVIKGWDQGLLGMCVGEKRKLRIPSKMGYGERGSPPKIPGGATLVFDTELIAVNGKTSGADTSESNSEL	1.04	1.08	0.973333	0.936667	1.04333	0.903333	1.02, 1.12, 0.98	1.15, 1.01, 1.08	1.02, 0.99, 0.91	1.0, 0.89, 0.92	1.12, 0.91, 1.1	0.89, 0.98, 0.84	0.0416333	0.0404145	0.0328295	0.0328295	0.0669162	0.0409607
p3925	TPM=14.46 TMHMM=1 Putative ortholog: Os02g44510 UDP-glucose glycoprotein glucosyltransferase 1 precursor, putative, expressed comp4293_c0_seq1_g775	GDSTGQPE[IL]FDFDHVYPR, WAGTP[IL][IL][IL]EANE[IL][IL]SK, [IL]VPEWVDFDSEAR, [IL]V[IL]NP[IL]SS[IL]AD[IL]P[IL]K, [IL][IL]NV[IL]EENDGSK, [IL][IL]SAAPPAESNSFR	6	ALRISSRRRRTKTPHKIPSDAGIIVRLLCRVATRIEAAAGGRALGRSASSPMAAARGSRSGVSRAALALFAAVLVGCLAGGVSAAEIRRQKNVQVALRAKWAGTPLLLEANELLSKERKDYFWDFVGQWKELDKGSECLTAKCCVQKIVEDVRSLLSEALASVFEFSLTLRSASPRLVLYRQLAEESLSSLPVKDDALEQIPGSGPVEETCCWVDTGSTLLFNSADLHKWLEGSGKGDSTGQPELFDFDHVYPRSNITAPVAIFYGAVGTKCFKELHVHLAEASKQGKVRYALRPVLPSGCQASSSFCGSIGAADAVTLSGYGVELALKNMEYKAMDDTAIKKGVALEDPKTEDLSQEVRGFIFSKILERKPELNAEIMAFRDSLLSSTVSDTLEVWEL…	1.03833	1.045	1.01833	0.981667	1.00167	0.993333	0.98, 1.03, 0.98, 1.11, 0.98, 1.15	0.89, 1.06, 0.92, 1.29, 1.04, 1.07	1.11, 0.97, 1.01, 1.02, 0.95, 1.05	1.13, 0.94, 1.02, 0.91, 0.98, 0.91	0.91, 1.02, 0.93, 1.15, 1.06, 0.94	1.25, 0.92, 1.1, 0.79, 0.92, 0.98	0.0304868	0.0578936	0.0234402	0.0343915	0.0378961	0.0657098
p7940	TPM=30.06 Putative ortholog: Os08g40230 expressed protein comp246_c0_seq1_g372	GE[IL]EPEQAYE[IL]FK, T[IL]YA[IL]VEDAMK, VDEETE[IL]ASVAEA[IL][IL]QR, [IL]NE[IL]DMDETK	4	MRRFITHLHRHSHSLRPSQPLPRIPATKINLPFLHSRRLLSDDAPPPPAEPSPPPPPAAEQPPAPPPSLADVPNEELKRRLEAYYKVDEETELASVAEALLQRGLADAHSETDDELIEELRDRPLPGVHDKDFDSDFDEMHETDDELPNLYNAREHVEKKMRKAELFNMDDAKWDAMVKKSSEERDRKVKAELVKGKQEFFAECRLNEIDMDETKWDQVIQEATEESGLGNMKECEDILEDMLHWDKLLPDEIKQKVDAKFNELGDMCERGELEPEQAYELFKEFEDKMVSECTELMEAEPPTVDELSEQDKKSVELNDPPGAGPVLRWESTIVFAPGGDAWHPKNRKVKLSVTVKELGLSRHAFRRLREVVGKRYNSGKDELTITSERFDHREENRKD…	0.9675	1.0625	1	1.04	1.1125	0.955	1.05, 0.9, 1.03, 0.89	1.07, 1.18, 0.89, 1.11	1.06, 0.87, 0.98, 1.09	1.01, 0.97, 0.95, 1.23	1.01, 1.32, 0.87, 1.25	1.0, 0.73, 1.1, 0.99	0.042106	0.0618297	0.0491596	0.0645497	0.104592	0.0790042
p10165	TPM=66.4 Putative ortholog: Os04g02900 dehydrogenase E1 component domain containing protein, expressed comp3058_c0_seq2_g831	GEGPT[IL]VEAETYR, RGEGPT[IL]VEAETYR, SVMAE[IL]FGK	3	GPSKPKPLHPSSSSSFTPPLSSPSSSSLYTPPPHPIPPHCLQAEAGESRPAEPEEMAAASFTAAKFLAPAVPARSGADRAPSFSVSSAMRPLRRVRPAQRLLAVSSDVLAGNKAAPAAAAQPAVTREEALELYEDMVLGRNFEDMCAQMYYRGKMFGFVHLYNGQEAVSTGFIKLLNQPDCVVSTYRDHVHALSKGVPARSVMAELFGKATGCCRGQGGSMHMFSEPHNVLGGFAFIGEGIPVATGAAFAAKYRHEVLKQSSPDGLDVTIAFFGDGTANNGQFFECLNMAQLWKLPIIFVVENNLWAIGMSHLRATSDPEIWKKGPAFGMPGVHVDGMDVLKVREVAKEAIDRARRGEGPTLVEAETYRFRGHSLADPDELRRPDEKSHYAARDPITQL…	0.963333	1.03	1.01667	1.06	1.08	0.986667	1.05, 0.98, 0.86	1.01, 1.03, 1.05	1.11, 1.03, 0.91	1.06, 1.05, 1.07	0.96, 1.05, 1.23	1.09, 1.0, 0.87	0.0554777	0.011547	0.0581187	0.0057735	0.0793725	0.0638575
p12390	TPM=58.3 Putative ortholog: Os05g06330 nifU, putative, expressed comp2384_c0_seq1_g1414	GFDPETG[IL]VK, [IL]RPAVQDDGGD[IL]EYR	2	MEVGSSDFPNARTAMTSPLAKALFAIEGVTRVFFGSDFVTVTKSDETSWDYLKPEVFAAIMDFYSSGQPLFLDANTAAAKDTAIHEDDSEIVAMIKELLETRIRPAVQDDGGDIEYRGFDPETGIVKLQMQGACSGCPSSAVTLKSGIENMLMHYVPEVKGVEQEFDGDEEAELATQTE	1.005	0.995	1.05	1.045	0.995	1.065	0.97, 1.04	1.07, 0.92	1.0, 1.1	1.03, 1.06	1.11, 0.88	0.93, 1.2	0.035	0.075	0.05	0.015	0.115	0.135
p1960	TPM=44.07 TMHMM=7 Putative ortholog: Os10g28240 calcium-transporting ATPase, plasma membrane-type, putative, expressed comp1940_c0_seq1_g665	GFG[IL]GEEQ[IL]TS[IL]TR, G[IL][IL]N[IL][IL]K	2	YVRRRDEVPPDDDGCDDVFGVQVRGPGDDPFDIPAKRAPVERLRRWRQAALVLNASRRFRYTLDLKKEEEKEHIRRKIRAHAQVIRAALLFKEAGEKQNGDRELQEILPRGFGIGEEQLTSLTRDHNYSTLQEYGGVKGLLNLLKTNSEKGIHGDEADLSSRANAFGANRYPRKKGRSFWVFLWEACQDLTLVILIVAAAISLALGIATEGIKEGWYDGASIAFAVFLVIFVTAVSDYKQSLQFQHLNEEKQNIQVEVIRGGRRIQVSIFDLVVGDVVALKIGDQVPADGVLISGHSLAIDESSMTGESKIVFKDQKSPFLMGGCKVADGYGTMLVTAVGLNTEWGLLMASISEDNNEETPLQVRLNGVATFIGIVGLVVAALVLVVLFARYFTGHTTN…	0.98	1	0.985	1.01	1.025	0.99	1.0, 0.96	0.95, 1.05	0.98, 0.99	0.98, 1.04	0.95, 1.1	1.04, 0.94	0.02	0.05	0.005	0.03	0.075	0.05
p11058	TPM=34.98 Putative ortholog: Os05g04520 protein kinase, putative, expressed comp3652_c0_seq1_g64	GFGDEA[IL][IL]GEGSFGR, QPDQE[IL][IL]AQVSMVSR, VQP[IL]AVPT[IL]PMDE[IL]R	3	MSCFGCCGDEDTQRAPDNRNQHAGSYPARTDAYRTADPTPKGSQPVKVQPIAVPTIPMDEIREVTKGFGDEALIGEGSFGRVYFGVLRNGRSAAVKKLDSSKQPDQELLAQVSMVSRLKHENVVELLGYCLDGATRVLAYEFATMGSLHDMLHGRKGVKGAQPGPVLSWIQRVKIAVGAAKGLEYLHEKAQPHIIHRDIKSSNVLLFDDDVAKIADFDLSNQAPDMAARLHSTRVLGTFGYHAPEYAMTGQLSSKSDVYSFGVVLLELLTGRKPVDHTLPRGQQSLVTWATPRLSEDKVRQCVDSRLGGDYPPKAVAKFAAVAALCVQYEADFRPNMSIVVKALQPLLNARAAHPGEQHAGR	1.09333	1.01	1.06667	0.973333	0.92	1.06333	1.06, 1.03, 1.19	0.96, 0.94, 1.13	1.11, 0.99, 1.1	1.04, 0.96, 0.92	0.9, 0.91, 0.95	1.15, 1.06, 0.98	0.0491031	0.0602771	0.0384419	0.0352767	0.0152753	0.0491031
p12893	TPM=34.48 Putative ortholog: Os03g52840 serine hydroxymethyltransferase, mitochondrial precursor, putative, expressed comp3921_c0_seq1_g1196	GFVEEDFAK, NTVPGDVSAMVPGG[IL]R, V[IL]ENVH[IL]AANK, [IL]DESTG[IL][IL]DYDQ[IL]EK	4	MAMATALRKLSSNALRGQPPSRLMPLYSMASLPATEERSGVTWPKQLNAPLEEVDPEIADIIELEKARQWKGLELIPSENFTSLSVMQAVGSVMTNKYSEGYPGARYYGGNEYIDMAESLCQKRALEAFNLDPEKWGVNVQPLSGSPANFQVYTALLKPHDRIMALDLPHGGHLSHGYQTDTKKISATSIFFETMPYRLDESTGLIDYDQLEKSAVLFRPKLIVAGASAYARLYDYDRMRKICNKQKAILLADMAHISGLVAAGVIPSPFEYADVVTTTTHKSLRGPRGAMIFFRKGLKEINKQGKEVKYDFEDKINAAVFPGLQGGPHNHTITGLAVALKQATTQEYRAYQEQVMSNCARFAESLSAKGYEIVSGGTDNHLVLVNLKKKGIDGSRVEK…	0.925	0.8975	0.9925	1.075	0.965	1.1775	0.95, 0.89, 0.99, 0.87	1.01, 0.58, 1.12, 0.88	1.03, 1.01, 1.0, 0.93	1.09, 1.14, 1.01, 1.06	1.06, 0.65, 1.14, 1.01	1.02, 1.75, 0.89, 1.05	0.0275379	0.116646	0.0217466	0.0272336	0.108359	0.193966
p2170	TPM=242.02 TMHMM=4 SignalP=yes Putative ortholog: Os04g41900 expressed protein comp208_c0_seq1_g447	GG[IL]SV[IL]APPAGDSASPAHR, TAEF[IL]ADG[IL]R	2	MGGLSVIAPPAGDSASPAHRRARRAFLVSNYMILGAASGCGFLTLSLRLVPSVDGFLLILLHALTVAAAVAGCAVIAAPDPPRGRVYTAHMSGTVVVSILQGAAAVLAFSRTAEFLADGLRSYVREEDGAVILRMVGGLGIAIFCLEWVALALAFVLRYYAYVDRECGGNPMRRSAKVGGEDGAGTWPWQFQV	0.96	0.81	0.955	0.995	0.845	1.215	0.97, 0.95	0.7, 0.92	1.01, 0.9	1.04, 0.95	0.72, 0.97	1.45, 0.98	0.01	0.11	0.055	0.045	0.125	0.235
p16065	TPM=77.53 Putative ortholog: Os03g10510 outer mitochondrial membrane porin, putative, expressed comp5698_c0_seq1_g471	GG[IL]YSFDVAGVYK, G[IL]AVGGEAAFDTSSGK, VDTQSNVSTT[IL]TV[IL]DV[IL]PSTK, [IL]SANENA[IL]TVGG[IL]YTVDPQTTVK	4	STAVKKGGLYSFDVAGVYKYKNTLVDVKVDTQSNVSTTLTVLDVLPSTKLVTSVKLPDYNSGKVELQYFHENATLATAVGTKPSPVVEFSAAVGPKGLAVGGEAAFDTSSGKFTKYSAGIGVTKPEFHAAFILADKGDTIKVSGVYHLDEKQKASAVAEFTRKLSANENALTVGGLYTVDPQTTVKARLNNTGTLAALLQHEVKPKSLLTISGEFDTKALDRAPKFGLTFALKP	1.0175	1.0525	1.005	1	1.04	0.9625	0.93, 0.97, 1.19, 0.98	1.11, 1.04, 1.13, 0.93	0.96, 1.13, 0.91, 1.02	1.03, 1.16, 0.76, 1.05	1.2, 1.07, 0.94, 0.95	0.86, 1.08, 0.81, 1.1	0.0585057	0.0451617	0.0473462	0.084951	0.0609645	0.0744284
p6727	TPM=1008.61 Putative ortholog: Os04g35090 40S ribosomal protein S10, putative, expressed comp200_c0_seq2_g880	GGAPAEFQPSFR, HPQ[IL]DVPN[IL]QV[IL]K, TF[IL]N[IL]PSE[IL]VPNT[IL]K	3	GSSFSPSRRRLLRHRPGALGARPTHGLPSMIISKKNRNEICKYLFQEGVLYAKKDYNLAKHPQIDVPNLQVIKLMQSFKSKEYVRETFSWQHYYWYLTNEGIEFLRTFLNLPSEIVPNTLKKSAKPPGRPFGSGPPGDRPRGPPRFEGDRPRFGDRDGYRGGPRGAPGDFAGEKGGAPAEFQPSFRSSGGGFGRGGGAGGFGRGGGYGGGPTSSSME	1.03	1.09333	1.00667	0.976667	1.06	0.93	1.11, 0.94, 1.04	1.14, 0.93, 1.21	1.11, 0.9, 1.01	1.0, 0.96, 0.97	1.03, 0.99, 1.16	0.98, 0.97, 0.84	0.0493288	0.0841295	0.0606447	0.0120185	0.051316	0.0450925
p652	TPM=68.0 TMHMM=1 SignalP=yes Putative ortholog: Os02g37590 glycerophosphoryl diester phosphodiesterase family protein, putative, expressed comp1238_c0_seq1_g632	GGGGVDGV[IL]TDFPGTAHR, TFASG[IL][IL]VPK, T[IL]SGDPPAV[IL]AK, [IL]GFGVVDAV[IL]K, [IL]SDF[IL]TFAK	5	MGRSGHACSLLAPLLLLLLSLGSAAAQKGSTWKTLSGDPPAVIAKGGFSGLFPDSSDLAYAFAASYQDSALWCDVRLTKDGVGICLPDIKMDNCTSIANVFPKGQNTYRVNGVSTKAWFSVDYDSIQLSNVSLERSIYSRIQRYDDVFQVIPVEVVLSQYKAPAFWLNVQHDSFYSQFNLSMRSYILSLSKQYTVDYISSPEVSFLKSLLGRVSSKTKLVFRFLDEGIVEPSTNQTYGSILKNLTSIKTFASGILVPKNYIWPVTADNYLKPATSVVDDAHKAGLEVYAADFANDFGLSYNYSYDPVTEYLGFVDGAFSVDGVLTDFPITALEAIGCFTNLNDTKVDHGAPLVISHNGASGDYPDCTDLAYKKAVTDGADVIDCVVQVTKDAIPICMSS…	0.886	0.958	0.946	1.068	1.086	0.99	1.01, 0.86, 0.93, 0.86, 0.77	0.93, 0.95, 1.09, 0.94, 0.88	1.03, 0.95, 1.0, 0.88, 0.87	1.02, 1.1, 1.06, 1.03, 1.13	0.92, 1.11, 1.16, 1.1, 1.14	1.11, 0.99, 0.92, 0.94, 0.99	0.0400749	0.0351283	0.0317175	0.0208327	0.0428486	0.0330151
p23295	TPM=40.71 Putative ortholog: Os04g59630 prenylcysteine oxidase 1 precursor, putative, expressed comp9525_c0_seq3_g918	GGNWQ[IL]AAG[IL][IL]K, [IL]NSQT[IL]SE[IL]VTV[IL]TR	2	MVRMEPRGLTSQEETENDDGDFRLRRRHPLTFSMPPLFLLLLLSSIHASAADDICIVGSGISGSSTAFFLTNYTTSLPQLRVFERRDRVGGRLATVSVAGDTFEAGGSVIHPRNLHVRRFADLLGLAARDDGEGDDDWLGIWDGARFVFSTLPPPPPGSSWLRRRLHALLNSLLLLRRYGLSLLRMDSFVQEMLQKFLLYYNGFESRPVFDSVEEMLKWSGLYGLTQRTLEEELIDARLNSQTISELVTVITRINYGQSVSISGLAGAVSLAGSESGLWAIKGGNWQLAAGLLKTANATLHLQEGIDSISDAGDYYVLKSN	1.02	1.11	1.09	1.07	1.08	0.995	1.09, 0.95	1.25, 0.97	1.11, 1.07	1.02, 1.12	1.14, 1.02	0.89, 1.1	0.07	0.14	0.02	0.05	0.06	0.105
p6378	TPM=189.16 Putative ortholog: Os05g16660 WD domain, G-beta repeat domain containing protein, expressed comp491_c0_seq1_g113	GHFGP[IL]NA[IL]AFNPDGR, SADWSHF[IL]TGS[IL]DK, [IL]ADD[IL]QDQTDESA[IL]V[IL]SG[IL]TGR	3	MRPILMKGHERPLTFLKYNRDGDLLFSCAKDHTPTVWFADNGDRLGTYRGHNGAVWSCDVSRHSTRLITGSADQTAKLWDVKTGRELFTFRFDAPARSVDFAIGDHLAVITTDSFMGNMPTAQVKRIADDLQDQTDESALVISGITGRINRAVWGPGNRTIITAGEDATIRIWDSETGKLLKESGKEEGHQKAISSLSKSADWSHFLTGSLDKSAKLWDARTLTLIKTYVTERPVNAVDISPTLDHVVIGGGQDAMNVTMTDRRAGKFEAKFFHKILQEEIGGVKGHFGPINALAFNPDGRSFSSGGEDGYVRLHHFDPEYFNIKM	1.02333	0.946667	0.91	0.9	0.933333	0.963333	1.01, 0.9, 1.16	0.97, 0.88, 0.99	0.95, 0.85, 0.93	0.94, 0.95, 0.81	0.96, 0.98, 0.86	0.99, 0.96, 0.94	0.075351	0.0338296	0.0305505	0.0450925	0.0371184	0.0145297
p20671	TPM=21.82 Putative ortholog: Os05g07680 KIP1, putative, expressed comp6588_c0_seq1_g252	GK[IL]DA[IL]EEK, SA[IL]SSEV[IL]T[IL]SEANTS[IL]ENK, VSE[IL]EE[IL]VEK, [IL]QAV[IL]TNYEGE[IL]AR, [IL][IL]E[IL]EDE[IL]HEAR	5	MKGSKVTQSRKSRSWWWDIHISPENSKWLSENLQEMETQVAEMLGLVEDEGESPAEKAEVYYQERPVLVSHIKNFCRMYRALAERYDNVTGELRKNIPSSLQSHGSGGISESDSETRSPSPSAEPDVEDKKGSDGSSSSSESESELDDAKEENGNSMLYALSQRIIELEDELHEARGKLDALEEKNMHSQNFDASSEGSEHDEKLQVSNVEIENCLEKDHEENNSEKEALEVVLLLKNETDGLKEAMASAAKQFEIELAHRDLEVDKCKEELRELSAKYLHDKSALEAETGRLQAVITNYEGELARLSQEKLQLGCRIEELEQEACNLDYSASEMVKLQEVIKNTKAELEEVSLEKAETIMNLEAELEIALQEKSVLQDRIKELEKVVSESLDKHSLEK…	1.024	1.068	1.03	1.01	1.042	0.97	1.03, 1.03, 0.97, 1.04, 1.05	1.18, 1.02, 1.12, 0.97, 1.05	1.06, 1.09, 1.04, 1.01, 0.95	1.03, 1.06, 1.08, 0.97, 0.91	1.14, 0.99, 1.15, 0.93, 1.0	0.9, 1.07, 0.93, 1.04, 0.91	0.014	0.0370675	0.0238747	0.0311448	0.0437493	0.0353553
p9684	TPM=158.91 Putative ortholog: Os05g04870 oxidoreductase, short chain dehydrogenase/reductase family protein, putative, expressed comp745_c0_seq1_g1120	GNTT[IL][IL]DYTATK, VA[IL]VTGGDSG[IL]GR, [IL]D[IL][IL]VNNAAEQYVR	3	MRALRLFQQFRPPPRQAYARALPACRALASFAASSPRAKQSPRCSRAMASQQFPPQKQDSQPGKEHLMEPRPEAIIKNYKAANKLQGKVALVTGGDSGIGRAVCLCFAMEGATVAFTYLKGHEDKDAEETLHALRDIKSRVGSGAGDPMALPADLGYEENCRKVVEEVANAHGGRIDILVNNAAEQYVRPCITDITEQDLDRVFRTNIYSFFFMAKYAVKRMKERGGGGSIINTTSINAYKGNTTLLDYTATKGAIVAFTRALSMQLAEQGIRVNGVAPGPIWTPLIPASFPEEKVKQFGSEVPMKRAGQPSEVAPCFVFLASEQDSSYMSGQVLHPNGGVVVNG	0.97	1.03	0.946667	0.97	1.06667	0.913333	0.93, 0.92, 1.06	1.03, 1.01, 1.05	1.1, 0.68, 1.06	1.18, 0.73, 1.0	1.11, 1.1, 0.99	1.06, 0.67, 1.01	0.0450925	0.011547	0.133832	0.130767	0.0384419	0.12252
p7991	TPM=62.2 Putative ortholog: Os05g48240 dynamin family protein, putative, expressed comp1942_c0_seq1_g501	GPAEAAVDTVHG[IL][IL]K, GTDAVD[IL][IL]EGR, SAQSE[IL]DAVAWSK, SSV[IL]ESVVGK, T[IL]AE[IL]ETE[IL]NR, VEVGNAAFES[IL]ER, [IL]AVDGQSDN[IL]VQE[IL]ENMVR, [IL]PG[IL]QS[IL][IL]TK, [IL][IL]TEADGYQPH[IL][IL]APEQGYR	9	AVVGGQSSGKSSVLESVVGKDFLPRGSGIVTRRPLVLQLHRIDGTREYAEFLHQPRKRYTDFAEVRKEIADETDRETGRSKGISSVPIHLSIFSPNVVNLTLIDLPGLTKIAVDGQSDNIVQEIENMVRAFIEKPNCIILAVSPANQDLATSDAIKISREVDPKGERTFGVLTKIDLMDKGTDAVDILEGRSYRLQFPWIGVVNRSQQDINKSVDMIAARRREREYFANTPEYKHLAHRMGSEHLAKSLSKHLESVIKSRIPGLQSLITKTIAELETELNRLGKPIANDAGGKLYTIMEICRMFDGIYKEHLDGVRPGGEKIYHVFDNQFPVAIKRLQFDKQLSMENVRKLITEADGYQPHLIAPEQGYRRLIESCLVSIRGPAEAAVDTVHGILKELV…	0.958889	0.913333	0.99	1.03444	0.958889	1.11222	0.93, 1.02, 1.01, 0.9, 1.01, 0.96, 0.98, 0.87, 0.95	0.7, 0.7, 1.04, 1.17, 0.88, 0.94, 0.86, 1.02, 0.91	0.98, 1.03, 1.0, 0.99, 0.94, 1.03, 0.89, 0.94, 1.11	1.06, 1.01, 0.99, 1.09, 0.94, 1.07, 0.91, 1.08, 1.16	0.76, 0.69, 1.03, 1.3, 0.88, 0.97, 0.87, 1.17, 0.96	1.39, 1.47, 0.96, 0.84, 1.07, 1.1, 1.04, 0.92, 1.22	0.0173561	0.0512348	0.0213437	0.0263054	0.0636929	0.0705293
p7646	TPM=39.28 Putative ortholog: Os09g39960 dynamin family protein, putative, expressed comp1777_c0_seq1_g1430	GPAEASVDAVH[IL]V[IL]K, NE[IL]DSVAWK, TEGGTEYAEF[IL]H[IL]PR, TVDE[IL]EAE[IL]DR, [IL]PS[IL][IL]SM[IL]NK, [IL]QHPWVGVVNR	6	MENLISLVNKLQRACTALGDHGDESALPTLWDSLPSIAVVGGQSSGKSSVLESIVGRDFLPRGSGIVTRMPLVLQLHKTEGGTEYAEFLHLPRKRFTDFAAVRQEISDHTDRITGKSKAISNKPIQLSIYSPHVVNLTLIDLPGLTKVAVEGQPESIVQDIENMVRSYVDKPNSIILAISPANQDIATSDAIKLAKEVDPSGDRTFGVVTKLDLMDKGTNAVDVLEGRSYRLQHPWVGVVNRSQADINKSVDMLAARRKEQEYFQSSPDYGHLAHKMGAEYLAKLLSEHLEAVIKAKIPSIISMINKTVDEIEAELDRLGRPIGGDAGAQLYTILDMCRAFDRVFKEHLDGGRPGGDRIYGVFDHQLPAALKKLPFDKHLSLQNVRKVISEADGYQPHL…	0.973333	1.04167	1.00667	1.03	1.06833	0.971667	0.99, 0.96, 0.99, 1.0, 0.96, 0.94	1.03, 1.03, 0.98, 1.03, 1.18, 1.0	0.98, 1.08, 1.01, 1.05, 0.97, 0.95	0.98, 1.12, 1.02, 1.04, 1.01, 1.01	1.03, 1.07, 0.98, 1.02, 1.24, 1.07	0.95, 1.05, 1.04, 1.02, 0.82, 0.95	0.00954521	0.0289156	0.0204396	0.0196638	0.037006	0.0351584
p8999	TPM=264.88 Putative ortholog: Os05g06430 OsPDIL2-1 protein disulfide isomerase PDIL2-1, expressed comp586_c0_seq1_g1205	GQ[IL]TSEAG[IL]VAS[IL]ES[IL]VK, HDEGVV[IL]AN[IL]DADK, TAEA[IL]AEYVNSEAATNVK, YGVSGYPT[IL]QWFPK, [IL]APEYEQ[IL]AASFK, [IL]YVN[IL]AK	6	WCGHCKKLAPEYEQLAASFKKAKSVLIAKVDCDEHKSVCSKYGVSGYPTIQWFPKGSLEPKKYEGQRTAEALAEYVNSEAATNVKIAATPSSVVILTEDTFDSVVLDETKDVLVEFYAPWCGHCKSLAPIYEKVASVFKHDEGVVIANLDADKYTKLAEKYGVSGFPTLKFFPKSSKAGEEYEGGRDLDDFVKFINEKSGTSRDSKGQLTSEAGLVASLESLVKDFHNAADDKRKEALSKLEEEAAKLSGSAAKHGKIYVNIAKKIVQKGSDYTKKETERLHRILEKSSISPSKADEFAIKKNILSIFSS	0.983333	1.08167	0.983333	1	1.09833	0.915	0.98, 0.92, 1.03, 1.03, 0.97, 0.97	1.17, 0.92, 1.18, 1.03, 1.15, 1.04	0.93, 0.92, 1.04, 0.97, 1.02, 1.02	0.94, 0.99, 1.02, 0.94, 1.05, 1.06	1.19, 1.0, 1.15, 1.0, 1.18, 1.07	0.79, 1.0, 0.88, 0.94, 0.89, 0.99	0.017062	0.041906	0.0207632	0.0214476	0.0355356	0.0321196
p4272	TPM=34.92 TMHMM=2 SignalP=yes Putative ortholog: Os08g06240 MYB family transcription factor, putative, expressed comp4867_c0_seq1_g1071	GS[IL][IL]PDQEPSEEPTPDPVAPSR, SGATAAAGGSFEQF[IL]R	2	MEFIDDDWDSQPRARVVHSRANAVANSSSAATANPASRSLPHTAACAASAVLLLAGAYSLGAAYQVFSSVLIWIAFSLLLAPFAPSSATGGDISVGRGSLLPDQEPSEEPTPDPVAPSRRGRRQNAAPPPPKSSDPIAPPAQMRAARQEGAAVLNSGEEREEDVGEWTDQEMELLRRQMLKHPAGEPQRWEKIASVFGGRRTPESVIRAAKSGATAAAGGSFEQFLRKRKPLDPRAEAADADAGGNAGGGDGGDGGWSASDDRALLNALKEFPKDTAMRWEKVAAAVPGKTKAGCMKRVTGLKRDFRSSKAPSEA	0.995	0.91	0.98	0.99	0.915	1.075	1.06, 0.93	0.88, 0.94	0.95, 1.01	0.89, 1.09	0.83, 1.0	1.07, 1.08	0.065	0.03	0.03	0.1	0.085	0.005
p8547	TPM=100.94 Putative ortholog: Os03g22950 acyl carrier protein, putative, expressed comp958_c0_seq1_g303	GSF[IL]DKDEVTER, VAVDF[IL]ASHPK	2	PQSSRLASPPLAAATTPTAAPPIPSHPASQDLMAAAARNLVLRHLRVAAAPASIRPAAALQGALSGRRWMSSEDAKGSFLDKDEVTERTIKVVKDFPKIQDPSKVKPDARFKDDLGLDSLDAVEVVMALEEEFCFEIPDDEADKIDSIKVAVDFIASHPKAK	0.885	1.195	1.17	1.355	1.39	0.98	1.0, 0.77	1.09, 1.3	1.08, 1.26	1.08, 1.63	1.09, 1.69	0.99, 0.97	0.115	0.105	0.09	0.275	0.3	0.01
p2505	TPM=46.7 TMHMM=1 Putative ortholog: Os05g25450 TKL_IRAK_CrRLK1L-1.3 - The CrRLK1L-1 subfamily has homology to the CrRLK1L homolog, expressed comp2332_c0_seq1_g759	GSFGY[IL]DPEYFR, YAPGN[IL]GSATAAAQDPSVPQTPY[IL]TAR	2	LLPLSPISSLTPPSSTSTVVAATFPSSPQISPPPPPAARRSSRQRANPARSAPGGPFDGRSVNREPPLKHTMRGAPRCALLLLLLSATALLPAALAQGGGSNSTAPAPSSSSTPFVPRDDILLDCGATGTGNDTDGRRWDGDAGSKYAPGNLGSATAAAQDPSVPQTPYLTARLSSAPFTYSFPLGPGRKFLRLHFYPTNYSASSSATLNAADARFSVTVPSAKLTLLSNFSAYQTATALNFAYLVREFSVNITGPTLDLTFTPDKSAHPNAYAFINGIEVVSSPDLFTISTPELVTGDGNNQPFPIESPTALQTMYRLNVGGQAISPSRDSGGYRSWDDDTPYIYGAGAGVSYQNDDNVTVAYPDAVPLYTAPTDVYATARSMGPDPNVNLAYNLTWI…	1.235	0.96	1.035	0.87	0.795	1.09	1.03, 1.44	0.91, 1.01	1.05, 1.02	1.03, 0.71	0.89, 0.7	1.16, 1.02	0.205	0.05	0.015	0.16	0.095	0.07
p270	TPM=16.44 TMHMM=1 Putative ortholog: Os06g07780 vesicle-associated membrane protein, putative, expressed comp10930_c0_seq1_g1165	GSTV[IL]AEHGAASTNASSVAR, [IL]PFAF[IL]ED[IL]HGR	2	PTSPSALLSPLPSPPLPCPRGRADSTRQQGAMSILYAVVARGSTVLAEHGAASTNASSVARQVLDRLPGGGADSHVSYTQDRYVFHAKRTDGITALCMADDAAGRRIPFAFLEDIHGRFVKTYGRAALTALAYAMNDEFSRVLGQQMDYYSNDPSSDRINRMRTEISQVRNVMIDNIDKVLERGDRLDLLVDKTTTMQGNTVRFKRQARRYRSTVWWRNVKLTAALILLLLVIIYIVLFFMCNGFTLPTCIR	0.925	0.765	0.865	0.94	0.825	1.165	0.89, 0.96	0.63, 0.9	0.87, 0.86	0.98, 0.9	0.71, 0.94	1.38, 0.95	0.035	0.135	0.005	0.04	0.115	0.215
p21663	TPM=17.46 Putative ortholog: Os10g35960 NAD-dependent malic enzyme, mitochondrial precursor, putative, expressed comp8126_c0_seq1_g517	GTD[IL][IL]HDPWYNK, MWYPVYSP[IL]VNDK, V[IL]P[IL]M[IL]DVGTNNQK, [IL][IL]G[IL]GD[IL]GVQG[IL]G[IL]P[IL]GK	4	STSAPAAGAGSALRGPCIVHKRGTDILHDPWYNKDTAFPLTERDRLGLRGLLPPRVMSFEQQYERFINSYHSLEHNTKGEPESVVSLAKWRILNRLHDRNETLYYRVLIDNIKDFAPIIYTPTVGLVCENYSGLFRRPRGMYFSAKDKGEMMSMIYNWPAETVDMIVVTDGSRILGLGDLGVQGIGIPIGKLDVYVAAAGINPQKVLPIMLDVGTNNQKLLDDKLYLGLRQPRLEGEEYLAVVDEFMEAVHARWPKAIVQFEDFQMKWAFETLQRYRNRFCMFNDDVQGTAGVALAGLLGAVRAQGRPLTDFTKQKIVVVGAGSAGLGVLNMAKHAMLRMPGIHKVGELGEGHNQFWVLDKDGLITKGRKCLDPAVARFARGFGPEEVEDLHEGASLVE…	0.99	1.0675	1.095	1.115	1.0825	1.025	1.05, 0.93, 0.93, 1.05	1.0, 0.99, 1.18, 1.1	1.01, 1.03, 1.26, 1.08	0.96, 1.11, 1.35, 1.04	0.96, 1.06, 1.26, 1.05	1.01, 1.04, 1.07, 0.98	0.034641	0.0449768	0.0569356	0.084113	0.0632949	0.0193649
p65441	TPM=40.63 comp3102_c0_seq1_g1174	GTDGAQ[IL]QAESDTFSR, NQ[IL]QAHFENVQR	2	GPCSCSEKRSTTRAIGDDEDGRRGWRSCGEDGATGASGRRQEIGARGEDGGHTTSSRLAEARRRHDLVAGGWISAVFEARTVGAQRQELHGGSLTAALRGGGEWIRRGRPVTSGGEEGGGGDGVVGAGAEDAALGWGIQRRQGGCGAWTEETKSGPRTLAAIPSCSPRRPPQFLLQRSSPAKTPSGVARRRPERPAELLAARTPLPPTVKIPEPQHTRFLLRLLREATLPTASRGSRKLGGGQLLREAAKRTGPNYPHLLPRPVTSSIGAGRTTPVSAQIPSQPAGIPLPAVLVFLLARTSPPTIQLPAAMLQLSSAPGKGFWARHRWKMLLSLGVAGAGYAAYRFYDAHQKQLVRVEQRQLEEQAADELVKNQLQAHFENVQRISDTTTLPFAMHYLR…	0.9	0.865	0.945	1.05	0.96	1.1	0.87, 0.93	0.86, 0.87	0.99, 0.9	1.13, 0.97	0.98, 0.94	1.16, 1.04	0.03	0.005	0.045	0.08	0.02	0.06
p62598	TPM=46.29 comp3004_c0_seq2_g431	GTFV[IL]QDNHFR, [IL]EA[IL]GFQVGHQ[IL]SER	2	AHRTLTFGPVDLSESRATRASGLVVPVNDRAFPPLSSLARSLFHRGSRRREERESSSEGDAMGREVSESCVDGVVMEMVAAYCGRFYAAKPELAAGRIEAIGFQVGHQLSERYTMERPRFSDHLEAIKFICKDFWSELFKKQIDNLKTNHRGTFVLQDNHFRWLTRVSLEPSVESADTTENDSASLGDSAAQTTSMLLYFPCGLIRGALTNLGIPCAVSADMSNLPACSFVVRIKT	1.02	0.955	0.985	0.965	0.93	1.035	0.96, 1.08	0.84, 1.07	0.87, 1.1	0.91, 1.02	0.87, 0.99	1.04, 1.03	0.06	0.115	0.115	0.055	0.06	0.005
p53405	TPM=45.53 TMHMM=1 SignalP=yes comp7658_c0_seq1_g1514	GTPVGAGAVSE[IL]TAEGD[IL]V[IL]R, [IL]GSDGN[IL][IL][IL]FDAR	2	MRRATRTIVVAVALYCWCLLAGGGVRAQPFDYPTASVPATWANTDASLPHHVVYADGSAARAAMLRLNPAGYGPSFAFGFFCTNHRTAPCNDFLLGVAVVYCNSGALMTSVTSGIPQVVWSANRGTPVGAGAVSELTAEGDLVLRSSPGGKVVWSAGTKGRSVAGARIGSDGNLLLFDARNRTVWQSFDHPTDALLVGQSLQHGARLTANTSTSDWRNGRIYLAVEDDSLSAYVDAKPPQR	1.04	0.885	1.08	1.04	0.85	1.235	1.03, 1.05	0.8, 0.97	1.1, 1.06	1.07, 1.01	0.78, 0.92	1.37, 1.1	0.01	0.085	0.02	0.03	0.07	0.135
p59378	TPM=321.73 comp484_c1_seq1_g721	GTVE[IL][IL]APVD[IL][IL]R, VGSSEAA[IL][IL]AK	2	IDVVVPPGNTGLDPSQTSFFQVLNIPTKINKGTVEIIAPVDLIRKGDKVGSSEAALLAKLGIRPFSYGLVITNVYDDGSVFSPEVLDLTDEDLIEKFASGVSMVASLSLAVSYPTMAAAPHMFLNGYKNVLAVAVETDYSFPHADQIKEYLKDPSKFAAAAPAAAAPSGGAAAAPEEEKEESDGESDGEGMGFSLFDD	0.985	1.025	1	1.015	1.035	0.98	1.05, 0.92	1.11, 0.94	1.03, 0.97	0.97, 1.06	1.05, 1.02	0.93, 1.03	0.065	0.085	0.03	0.045	0.015	0.05
p8718	TPM=123.53 Putative ortholog: Os02g56180 dehydrogenase, putative, expressed comp909_c0_seq1_g703	GVDV[IL][IL]DN[IL]GGSY[IL]QR, TFP[IL]SEAAESHK	2	MKAAVISSPGGPEALEVREVEDLPAPGDGEVLVKVAAAGVNRADTVQRQGKYPPPPGASLYPGLECAGTILALGPNVPPRWAVGDQVCALLTGGGYAEKVVVPAGQLLPVPEGVSLTDAAGLPEVACTVWSTVFMTSHLSPGESFLIHGGSSGIGTFAIQIAKHLGIKVFVTAGSEEKLAACKDLGADVCINYKTEDFVARIKEETDGKGVDVILDNIGGSYLQRNLNSLAVDGRLFIIGFMGGVVTEVNLAVMLARRLTVQAAGLRNRNLTNKAQIVSEVEKNVWPAVVLGKVKPVVYKTFPLSEAAESHKLMETSSHIGKILLIP	1.035	0.925	0.835	0.805	0.89	0.905	1.08, 0.99	0.94, 0.91	0.79, 0.88	0.73, 0.88	0.87, 0.91	0.84, 0.97	0.045	0.015	0.045	0.075	0.02	0.065
p6104	TPM=491.15 TMHMM=3 SignalP=yes Putative ortholog: Os04g21320 membrane associated DUF588 domain containing protein, putative, expressed comp92_c0_seq1_g111	GVE[IL]AAFPR, VMGAPASGGGGEDAGE[IL]SPAEAR	2	MSKMADEKVMGAPASGGGGEDAGELSPAEARVRPLETLLRAAPLGLCVAAMAVMLRDTQTNEYGTVSYSDLGGFKYLVYANGLCAAYSLVSAFYTAVPRPATLSRSWIVFLLDQVFTYLILAAGAASAELLYLAYNGDKEVTWSEACGVFGGFCRQAKTSVAITFGSVLCYIVLSLISSYRLFSAYDAPVPSHGNKGVEIAAFPR	0.96	0.99	1.055	1.1	1.03	1.065	0.95, 0.97	0.96, 1.02	0.95, 1.16	1.0, 1.2	1.01, 1.05	0.99, 1.14	0.01	0.03	0.105	0.1	0.02	0.075
p18311	TPM=20.31 Putative ortholog: Os12g07110 acyl-CoA synthetase protein, putative, expressed comp7021_c0_seq2_g145	GVPVDVGGEPGYA[IL]R, [IL][IL]PDPWTPESG[IL]VTAA[IL]K	2	PVSRVLPAQPLCTSTPPPVTTSASAPPPTATSASAPPLATTFAYAVARREGKSRRLIVGRADDPLLTLRRRLSAMEGPSPCRRARRRSPPHLAPSGRASPHRASPGPSFPWSGPLLAPLNSGTSLAKTKGTVWGLGGDARRATTCTAAFRTSTPRPVAQGVGLLMLSPLAGLPAWCSAACDGTGVLVAHRGFWNHPCTSMNPYFVGLLVPIAVSLLLQKRRKVEKKRGVPVDVGGEPGYAIRNHRFEHPVETHWEGVTTLAELFEHACKEYVYMPLLGTRKLISREMEASPDGRSFEKLHLGEYEWKCYAEAFKSVCNFSSGLIQLGHQKSERVAIFAETRAEWQIALQACFRQNISVVTIYASLGEEALCHSLNETEVTTVVCGQKEFKKLIDIGWQL…	0.99	0.99	1.02	1.035	1	1.035	0.98, 1.0	0.91, 1.07	0.97, 1.07	1.0, 1.07	0.93, 1.07	1.07, 1.0	0.01	0.08	0.05	0.035	0.07	0.035
p15090	TPM=38.42 Putative ortholog: Os01g67340 STRUBBELIG-RECEPTOR FAMILY 8 precursor, putative, expressed comp4646_c0_seq1_g1029	GVQGAQPGPA[IL]DWMQR, TDDFGATA[IL][IL]GEGSYGR, VYYAV[IL]DTGTK, [IL]ADFN[IL]SNQAPDMAAR, [IL]DSTENETSSEF[IL]TQVS[IL]VSR	5	MWRRWICCSRQADEFDERENWHAKAPTSNVDGVRKGLKDSATVKAEPQDSALSIDIPVLSLDELIEKTDDFGATALIGEGSYGRVYYAVLDTGTKMAVKKLDSTENETSSEFLTQVSLVSRLKHDNFVDILGYCMERNLRIVAYEFATMGSLHDILHGRKGVQGAQPGPALDWMQRMKIAVDAAKGLEYLHEKVQPSIVHRDVRSSNILLFEDFKAKIADFNLSNQAPDMAARLHSTRVLGTFGYHAPEYAMTGQLTQKSDVYSFGVVLLELLTGRKPVDHTMPRGQQSLVTWATPRLTEDKVKQCIDPRLNGEYPPKGVAKLAAVAALCVQYEAEFRPSMSIVVKALSPLTLNKQTPPAPPPPAAMDS	1.084	0.922	0.986	0.908	0.854	1.09	1.14, 1.01, 1.02, 1.03, 1.22	0.74, 0.92, 1.01, 0.81, 1.13	1.09, 0.97, 0.92, 0.86, 1.09	0.95, 0.96, 0.9, 0.84, 0.89	0.65, 0.91, 0.99, 0.79, 0.93	1.47, 1.05, 0.91, 1.06, 0.96	0.0413038	0.069527	0.0458912	0.0217715	0.0604649	0.0990454
p58715	TPM=47.73 comp1295_c0_seq2_g1207	GYVEAV[IL]NS[IL]AANVPK, MVVA[IL]VDMER, QAAS[IL][IL]ADDDPSDDSAPR, V[IL]MD[IL]VNASANATPG[IL]GR, [IL]GESMVQSAEGTR, [IL]S[IL]VDT[IL]AK	6	GLLLRSQASKQTTTPPVFPISLSPSLCFSLYLYLAHVSSPQISNPRRVDDEGQVSAAAAVPVRSRSGAPRDPPVPTPTMEAMEELSQLSESIRQAASLLADDDPSDDSAPRRPSTFLNAVVLGNVGAGKSAVLNSLIGHAVLPTGENGATRAPIVVDMQREPGLSSKSIVLQIDSKSQQVSSSALRRSLQERLSKAATSGSGRGRAEEISLKLRTSTAPSLKLIDLPGLDQRVVDDSMINDYAGHNDAILLVVIPAAQAAEVASSRALRLAKDIDSDGSRTIGVLSKIDQSEGDAKTIACVQALLSNKGPKNLPDIEWVALIGQSVAIAAAQSGAVGSENSLEAAWQAEAESLKSILTGAPPSKLGRISLVDTIAKQIRKRMKVRVPNLLTGLQGKSQM…	0.958333	0.988333	0.95	0.991667	1.03	0.966667	0.99, 0.93, 1.03, 0.91, 0.96, 0.93	1.09, 0.93, 1.03, 0.92, 0.96, 1.0	1.03, 0.96, 0.94, 0.91, 0.94, 0.92	1.04, 1.02, 0.92, 1.0, 0.98, 0.99	1.1, 1.0, 1.0, 1.01, 1.0, 1.07	0.95, 1.03, 0.92, 0.99, 0.99, 0.92	0.0183333	0.02651	0.0175119	0.016816	0.0178885	0.0180123
p9859	TPM=464.33 Putative ortholog: Os03g05980 40S ribosomal protein S9-2, putative, expressed comp207_c0_seq1_g16	H[IL]DFS[IL]TSPFGGGPAGR, Q[IL]VNVPSFMVR, [IL]DYV[IL]A[IL]TAENF[IL]AR	3	GWSSLLLSISTTERRRRRHSGRERESEERAPAMVHVNFYRNYGKTFKKPRRPYEKERLDAELKLVGEYGLRCKRELWRVQYALSRIRNAARHLLTLDEKNPRRIFEGAALLRRMNRYGLLAEGQDKLDYVLALTAENFLARRLQTLVFKAGMAKSIHHARVLIRQRHIRVGRQIVNVPSFMVRVESEKHIDFSLTSPFGGGPAGRVKRKNQKKASGGGDAGGDEDEE	1.01	0.993333	1.00333	0.99	0.983333	1.01	1.03, 1.0, 1.0	1.03, 0.93, 1.02	1.03, 0.98, 1.0	1.0, 0.97, 1.0	1.0, 0.93, 1.02	1.0, 1.05, 0.98	0.01	0.031798	0.0145297	0.01	0.0272845	0.0208167
p13541	TPM=58.15 Putative ortholog: Os01g74520 methyltransferase domain containing protein, putative, expressed comp2823_c0_seq1_g1365	H[IL]DVAGGTGDVAFR, QSYQY[IL]VES[IL]R	2	KKVGPVAAHLLHLCSPSPQSSPPSPCLPRRPGSTAWIGHLVSPRKAMALRAAAARLASSTLRRRHRHLLPPAALLSPATAHPAAFLHSHATSFGYKQVREDEKSKLVGNVFSSVASSYDVMNDLMSAGLHRLWKDRLISKLNPFPGMKHLDVAGGTGDVAFRVVERIKSVSHRATQGTLTHLEEDTHIYVCDINPNMLDVGKKRAAEKGYNEEQCLSWVEGDAEALSFEDGSMDGYTIAFGIRNVTHIEKALSEAYRVLKKGGRFLCLELSHVDVPIFKDIYDAYSFSVIPAVGELVAGDRQSYQYLVESIRRFPKQEKFAQMIQEAGFERVEYENLVGGVVAIHSGLKL	0.95	0.935	0.92	0.96	0.985	0.975	0.93, 0.97	0.9, 0.97	0.84, 1.0	0.9, 1.02	0.98, 0.99	0.92, 1.03	0.02	0.035	0.08	0.06	0.005	0.055
p55708	TPM=233.26 comp459_c0_seq1_g729	HAG[IL][IL]DMQFK, V[IL]PADWEPNT[IL]YR	2	FDLSGTAFGAMAMPGRNDQLRHAGIIDMQFKRVPCEYPGLTVTFHVEQGSNPNYLAILVEYEDGDGDVVQVDIMESRPDTTGKDGMSPTGQWLPMKESWGSIWRMDTWHPMQGPFSLRITNESGKTLVADKVIPADWEPNTIYRSIIQFN	1.005	1.165	0.97	0.965	1.15	0.865	1.05, 0.96	1.38, 0.95	0.96, 0.98	0.91, 1.02	1.31, 0.99	0.7, 1.03	0.045	0.215	0.01	0.055	0.16	0.165
p4111	TPM=19.09 TMHMM=7 Putative ortholog: Os04g52900 ABC transporter family protein, putative, expressed comp4489_c0_seq1_g923	HD[IL]D[IL][IL]PGGD[IL]TE[IL]GER, [IL][IL][IL][IL]HDGV[IL]K	2	ALTVEGPGRAPLCPALWAGPGDISTFGVLPSEGFFRLASSPTPGSDQIAAVFRKSLRLTNDSRKKFASGRITNLISTDAESLQQVCQQLHGLWSAPSRTVIAMVLLYAQYPVVVTVVSFGVYSLLGGDLTAAKAFTSLSLFAVLRFPLFMLPNLITQVVNCKVSLKRLEDLLLADERLLLPNPPIDPEVPAISIKNGNFSWELQAERPTLSNVNLDVPYGSLVSIVGSTGEGKSSLISAMLGKIAPVSGSDASVVIRGSVAYVPQVSWIFNATVRDNILFGAPFQPPRYERAIDVTSLRHDLDLLPGGDLTEIGERGVNISGGQKQRVSMARAVYSDSDVYIFDDPLSALDAHVGRQVFDKCIKEELRHKTRVLVTNQLHFLPYVDKILLIHDGVIKEE…	0.94	0.98	0.96	1.025	1.055	0.99	1.02, 0.86	0.9, 1.06	1.02, 0.9	1.01, 1.04	0.88, 1.23	1.14, 0.84	0.08	0.08	0.06	0.015	0.175	0.15
p13504	TPM=49.65 Putative ortholog: Os09g36450 triosephosphate isomerase, chloroplast precursor, putative, expressed comp3043_c0_seq1_g1254	HV[IL]GEDDQF[IL]GK, VASPEQAQEVHAAVR, [IL]EVSAQNTW[IL]GK	3	MAAPSSLASSHLSRLAAAAPAPQHHHHQHQLRLGCSRRRAQRLVAMAGSGKFFVGGNWKCNGTKESISKLVSDLNAATIENDVDVVVAPPFIYIDQVKSSLTDRIEVSAQNTWIGKGGAFTGEISAEQLVDIGCQWVILGHSERRHVIGEDDQFIGKKAAYALGQNLKVMACIGELLEEREAGKTFEVCFKQLKAFADNITNWTNVVIAYEPVWAIGTGKVASPEQAQEVHAAVRDWLKTNVSADVASAVRIIYGGSVNAANSAELAKKEDIDGFLVGGASLKGPDFATICNSVTSKKVTA	0.963333	0.95	0.92	0.95	0.986667	0.966667	0.94, 0.97, 0.98	0.89, 0.94, 1.02	0.87, 0.94, 0.95	0.92, 0.96, 0.97	0.95, 0.96, 1.05	0.97, 1.0, 0.93	0.0120185	0.0378594	0.0251661	0.0152753	0.031798	0.0202759
p9698	TPM=279.63 Putative ortholog: Os06g33330 powdery mildew resistant protein 5, putative, expressed comp376_c0_seq1_g1152	HWA[IL]VGDS[IL][IL]R, VEDPTDAYHDETWQSR	2	SLPALPSTYQPPSRASPITLTPRARACAECRCSPGMGMEYEPVPVPGQKKVGGGRTALKLLMAVLLAGFALRLLADHCASYRLPPPAAPEEALALAVTTAPEQDADGVDGTPATPNGAAECDLFHGEWVPDSSGPAFTNATCRFIEVPQNCMSNGRPDDGYLHWKWKPYGCDVLPPFDGKAFLESMRGKHWALVGDSILRNHAQSLVCLLAKVEDPTDAYHDETWQSRRWYFPSHNFTLSLVWAPYLVKSEIFEDENGVSSAEPRLHFDALDANWISKWSSFDYVIISTGQWFFKVAVYMEKGTAVGCHYCKDKSLKEITIEQSFRRSLREAFRFITTSPHKPVVFYRTWSPSHFENGEWFSGGTCDRKVPFKPWQTGDRQLDNLMWRIERAEFAKAAA…	1.06	1.075	1.055	0.99	1.01	0.995	1.07, 1.05	1.19, 0.96	1.04, 1.07	0.96, 1.02	1.11, 0.91	0.87, 1.12	0.01	0.115	0.015	0.03	0.1	0.125
p1841	TPM=92.0 TMHMM=1 SignalP=yes Putative ortholog: Os01g16970 glucosidase II beta subunit-like domain containing protein, expressed comp1861_c1_seq1_g578	K[IL]DTTSSD[IL]PGHDE[IL], TSVVEHD[IL]TAGTR, WTGENVDDVGK, [IL]QQTVQNV[IL]QK	4	MAKGGAAASGGGAVKTALVVGGGLILAWITVESAFKPFLDRLRAAVSRSTDPARDPDDDVPEDDKAPSTAAVAAAASSQPLETLGIPPQDEAYYRGGVIKCRDGSGKFTRDQLNDDFCDCPDGTDEPGTSACPEGKFYCQNAGHSPITIFSSRVNDGICDCCDGSDEYGSNGTCKNTCWEAGKAAREKLKKKVATYKSGVVIRNQEVEKAKVALAKDEAELAKLKGEEKILQGLVDKLTEQKKLIEKAEEEERLIKEKEEKRIKEEAEKQAAEEKKAPDASQEADSEDANGNEQEGESKVSEHHDGHVTDHDNHSPEGKTSVVEHDITAGTRDDAPAETSAVPTKEQDPTSVNTEGLSKAELGRLVASRWTGENVDDVGKGDKKGHDDEFDIPEPAEAA…	0.97	0.9325	0.9375	0.9675	0.965	1.0175	1.01, 0.96, 0.97, 0.94	0.93, 0.78, 0.99, 1.03	0.98, 0.91, 0.95, 0.91	0.97, 0.95, 0.98, 0.97	0.93, 0.81, 1.02, 1.1	1.05, 1.17, 0.96, 0.89	0.0147196	0.0548293	0.0170171	0.00629153	0.0622495	0.0604669
p5942	TPM=19.15 TMHMM=1 SignalP=yes Putative ortholog: Os03g05920 expressed protein comp8817_c0_seq2_g1104	K[IL]PAEA[IL]DV[IL]ER, NF[IL][IL]ET[IL]ENE[IL]PEGT[IL]R	2	MAAVEDIVIAGAGLAGLATALGLHRKGVKSLVLESSATLRASGYAFTTWTNAFRALDALGVGDKIREHHLRYERLVAFSASTGEAAATVSLKMQGKSGPHEIRCVKRNFLLETLENELPEGTIRYSSKIVAIEEEGNVKVLHMADGSIIRANVLVGCDGVNSVVAKWLGLPKPILSGRSATRGLAEYPEGHGFGPEMLQFIGQGFRSGVLPCSDTSVYWNYTWYPSPADGDAEESVAKMRQHVLSKLGATKKIPAEALDVIERSEMSEVVSSPLRFRSPLALVRGSISRGNVCVAGDALHPMTPELGQGGCAALEDGVVLARCLGEAFVGAGNDGGYACVTAALEKFAGERRWRAIRLVTAAYVVGFVQQSSNAAIKFLREKFLSGLLAKLMVDMADFD…	1.11	1.1	1.1	0.995	1.01	1.035	1.03, 1.19	1.26, 0.94	1.01, 1.19	0.99, 1.0	1.23, 0.79	0.8, 1.27	0.08	0.16	0.09	0.005	0.22	0.235
p1335	TPM=41.72 TMHMM=2 Putative ortholog: Os02g23890 protein transporter, putative, expressed comp1565_c0_seq1_g743	KDVYQ[IL]FAEK, YMEAEE[IL]VNT[IL][IL]SK	2	MAGKGAKATSGKAAEKEKGKKAAPASRSSRGGSQEQPAPKKDVYQLFAEKVRDNKQLESRWAIMQETRVEYFRGKDFTTFIKTHPEVGEILGPDKYMEAEEIVNTLLSKNLVIRCDRVWKTVRPGKKKLSSWPAHLEIHQEQVFTENDGFYAWMFLKRRTLWQTILSFVWPLFALAVCLFPVYPYQCKIVVLYSCAGALLFIVSLLLLRAAIFGILWVLLGKRVWFFPNINAEETTFRELLRFWPDKDEGERPKWTSRLFYATVTVLVILLLRHHAPDEAARARYQKKVSNIIDDVLEWSPKLALSGMMDKHAEDNATETGSYSHVPTTTEEETIAAAEDVDADETQDSGVDADETQD	0.985	1.08	1.02	1.04	1.095	0.955	1.05, 0.92	1.2, 0.96	1.04, 1.0	0.99, 1.09	1.14, 1.05	0.87, 1.04	0.065	0.12	0.02	0.05	0.045	0.085
p19908	TPM=17.73 Putative ortholog: Os01g67550 FAD binding domain containing protein, expressed comp6704_c0_seq1_g1119	KFDG[IL]AGD[IL]ER, S[IL]Q[IL]QFPAED[IL]GFR, TEPDMVSDAHSEVR, V[IL]NS[IL][IL]APV[IL]PR, [IL]C[IL][IL]QNG[IL]AAPS[IL][IL]QTYESER	5	MPSIAGGGGWRLFSAARGITWMRRRNLQRPPFSSLAGGGGGDAPHLPVVIVGAGPVGLVLSFLLTKFGIKCTVLEKSMEFTRHPRAHFINNRTMEIFRKFDGLAGDIERAQPPVDLWRKFVYCTSLSGSILGSVDHMKQEDFDKVISPISVAHFSQYKLVDLLLKKLDGVGFQTCYPDDLGGGSTQDLLFENKILMGHECSSIQLTDEGVLVGASYNSEGRMQERKLHCGLLLGADGARSKVRELAGISMKGERDLQKLVSVHFVSRDLGKYLSSERPGMLFFIFNPDAIGVLVAHDLEHGEFVLQVPFYPPQQMFEDFSKKVCKQIIVKLVGWEPADIQVLDIKPWAMHAEVAEKYVGCDNRVILVGDAAHRFPPAGGFGMNTGVQDAHNLAWKLCLL…	1.052	0.994	0.994	0.948	0.946	1.004	0.95, 1.12, 0.99, 1.04, 1.16	1.01, 1.11, 0.89, 0.9, 1.06	0.96, 1.1, 0.99, 0.91, 1.01	1.01, 0.98, 1.0, 0.88, 0.87	1.06, 0.99, 0.9, 0.87, 0.91	0.95, 0.99, 1.11, 1.02, 0.95	0.0391663	0.0434281	0.0314006	0.0302324	0.0347275	0.0295973
p7743	TPM=369.29 Putative ortholog: Os07g08330 ribosomal protein L4, putative, expressed comp270_c0_seq1_g1693	KGP[IL][IL]VYGTEGSK, N[IL]TGVDVANVER, VAVTSA[IL]AATAVPA[IL]V[IL]AR, [IL]DEVYGS[IL]ETPS[IL]K, [IL]ENVPEFP[IL]VVSDSAEGVEK	5	MATNTRPLVSVKALEGDMATDAAGLALAEVFRAPIRPDIVRFAHRLLSCNKRQPYAVSPKAGHQTSAESWGTGRAVSRIPRVPGGGTHRAGQGAFGNMCRGGRMFAPTKVWRKWHRRVNVQLRRVAVTSALAATAVPALVLARGHRIENVPEFPLVVSDSAEGVEKTAQAIKVLKQLGAYADAEKAKDSVGIRPGVGKMRNRRYINRKGPLIVYGTEGSKIAKAFRNLTGVDVANVERLNLLDLAPGGHLGRFVIWTESAFKKLDEVYGSLETPSLKKKGFVLPRPKMTNADLGRLINSDEVQSVVKPINKEVKRREARKNPLKNAAAVLKLNPYFGTARRMAVLAEAARVKARKDKINSKRTKLSAEEASKIKAAGKAWYQTMISDSDYTEFDVFSKW…	0.936	1.078	1.078	1.266	1.28	1.018	1.02, 0.52, 1.32, 0.82, 1.0	1.26, 1.02, 0.85, 1.23, 1.03	1.05, 1.05, 1.01, 1.02, 1.26	1.03, 2.02, 0.77, 1.25, 1.26	1.24, 1.98, 0.65, 1.5, 1.03	0.83, 1.02, 1.19, 0.83, 1.22	0.131362	0.0754586	0.0461952	0.208629	0.22354	0.0839881
p55531	TPM=909.56 comp87_c1_seq1_g364	KTEGE[IL]FETDK, SG[IL][IL][IL]VTGPFK, ST[IL]TPGTV[IL][IL]V[IL]AGR, TEGE[IL]FETDKEATK	4	MAPPSKMALGIKRASRSNTYHRRGLWAIKAKNGGAFPKAEKPAAVAEPKFYPADDVKPRTVSTRKPKPTKLRSTITPGTVLIVLAGRRYMGKRVVFLKQLKSGLLLVTGPFKVNGVPIRRVNQSYVIATSTKVDISKVNVEKFDDKYFAREKKTRVKKTEGELFETDKEATKNLPDFKKDDQKAIDGELIKAIEAVP	0.9925	1.08	1.085	1.115	1.095	1.005	1.03, 0.98, 1.08, 0.88	1.09, 1.09, 1.05, 1.09	0.93, 0.96, 1.03, 1.42	0.91, 0.98, 0.96, 1.61	1.06, 1.11, 0.97, 1.24	0.86, 0.88, 0.98, 1.3	0.0426956	0.01	0.113615	0.165655	0.0563471	0.101776
p71246	TPM=41.41 comp7917_c0_seq3_g113	KVPANEEP[IL]MK, Y[IL]APEQVPVQFGG[IL]FK	2	EKRERFLKWRIQLLERGILSQLDFAPSGICSMVQVTDLKNSPPMLGKHRAVTRQAVALLQDNYPEFIAKKVFINVPWWYLAANKMMSPFLTQRTRSKFVFASQAKSPETLFRYIAPEQVPVQFGGLFKEDDPEFTTADSVTEITIKASSKETIEIPVTENSTIVWELRVLGWEVSYGAEFTPAAEGGYTVIVQKTRKVPANEEPIMKGSFKVTEAGKIALTINNPASKKKKLLYRSKVKNTSESV	0.94	0.98	0.805	0.855	1.04	0.82	0.95, 0.93	0.99, 0.97	0.73, 0.88	0.76, 0.95	1.03, 1.05	0.74, 0.9	0.01	0.01	0.075	0.095	0.01	0.08
p2843	TPM=194.27 TMHMM=1 Putative ortholog: Os02g39550 calcium-binding mitochondrial protein anon-60Da, putative, expressed comp2679_c1_seq2_g331	M[IL]QAEGVES[IL]SEEE[IL]R, VSNDE[IL][IL]NFAK	2	PSTVPATSPPSPNGEGGTAGPADGGPARLQLRGGLCLKRHDLCLPIGKHGTFGLNAESRIGQQLLEQSLGASKSEKEKEQYSINLAKGGLLGSDNGLLRRPAHVISLYGYGIGRNEFALPLGAKGLLQSVRRASTATAGQPKLDTEEQSDDQNQNKRKKEASPEECDQAVEGLSTAKAKAKAKQVQDLLKADQSIVKKFWARLLGIGPALRAVASMSRADWATKLKHGKDEFISTLQHYWLGTKLLWADVRISSRLLVKLAGGKNLSRRERQQLTRTTADIFRLVPVAVFIVVPFMEFLLPVFLKLFPNMLPSTFQDKMKEEEALKRKLKARMEYAKFLQDTAKEMAKEVQTSRSGETKQTAEDLDEFLNKVRKGERVSNDEILNFAKLFNDELTLDNM…	0.985	1.015	1.07	1.09	1.035	1.055	1.02, 0.95	1.02, 1.01	1.12, 1.02	1.1, 1.08	1.0, 1.07	1.1, 1.01	0.035	0.005	0.05	0.01	0.035	0.045
p3941	TPM=245.93 SignalP=yes Putative ortholog: Os10g33800 lactate/malate dehydrogenase, putative, expressed comp431_c0_seq1_g1702	MDATAQE[IL]SEEK, ME[IL]VDAAFP[IL][IL]K, [IL]DVQVSDVK	3	MAAKEPMRVLVTGAAGQIGYALVPMIARGIMLGADQPVILHMLDIPPAAEALNGVKMELVDAAFPLLKGVVATTDVVEACTGVNVAVMVGGFPRKEGMERKDVMSKNVSIYKSQASALEAHAAPNCKVLVVANPANTNALILKEFAPSIPEKNISCLTRLDHNRALGQISERLDVQVSDVKNVIIWGNHSSSQYPDVNHATVKTSSGEKPVRELVKDDEWLNAGFIATVQQRGAAIIKARKLSSALSAASSACDHIRDWVLGTPEGTFVSMGVYSDGSYGVPAGLIYSFPVTCCGGEWTIVQGLPIDEFSRKKMDATAQELSEEKALAYSCLE	0.973333	1.01333	0.98	1.02667	1.04667	0.98	1.02, 1.1, 0.8	0.97, 1.17, 0.9	0.95, 1.03, 0.96	0.93, 0.94, 1.21	0.95, 1.06, 1.13	0.98, 0.89, 1.07	0.0896908	0.0808977	0.0251661	0.0917121	0.0523874	0.0519615
p9534	TPM=142.57 Putative ortholog: Os11g21990 expressed protein comp715_c0_seq1_g887	MEDN[IL][IL]EFFPSGK, TSEA[IL]SEHFTK, [IL]SG[IL]PPETVFQP[IL][IL]K	3	AAHARDRELGFFNTPPPIASAAAQPAVPLQAPISSTPRLRSRSLFMSSKEKPTLGGQRIKTRKRNIAAPLDPASFSDAIVQIYLDNAGDLELVAKSIESSDLNFSRYGDTFFEVVFIGVRTQPGTIKPEEEGERHPYSLIDCAAQRESILPYVLFIQKTLRRRPFLIKSLENVMRKFLQSLEFFEENERQKLAIFTALAFSQKLSGLPPETVFQPLLKDNLVAKGIVLSFITEFFKEYLKENSLDDLIALLKKGKMEDNLLEFFPSGKRTSEALSEHFTKEGLTSLVEYNDKKMFEVKLKEIKSTLTTMISEEAEISEVTEVVKQQVKDAQFPDLEVVRMLWDVLMEAVQWSGKNQQQNSNSALRQVNAWAGLMNAFCTSGKLELELIYKVQTQCYEDA…	0.98	1.00333	0.946667	0.966667	1.02667	0.94	0.93, 0.98, 1.03	0.98, 1.04, 0.99	0.94, 0.96, 0.94	1.01, 0.97, 0.92	1.06, 1.06, 0.96	0.95, 0.92, 0.95	0.0288675	0.0185592	0.00666667	0.0260342	0.0333333	0.01
p5534	TPM=16.14 TMHMM=2 Putative ortholog: Os11g20384 SacI homology domain containing protein, expressed comp7720_c0_seq1_g481	MESD[IL]SE[IL][IL]DAAER, SAQG[IL][IL]ND[IL]QYS[IL]AR	2	LPHRSELEDSVDVGCLAPPQLSSGDRARPIVCAGLPFAAPSRGQSRPTNRSRGHPIMAGENDANLSCKLHTRLRLWEFADRYIFEPIDGLADFYLSVSRANGSMNLVEELPPRSPSMNPKVRTVYGVIGVLKLAVGSYFLVITDRDCVGSYLGHAIFKVTGLKVLACNNSPNTSSEQKKMESDISELLDAAERTMGLYFSYDINLTLNSQRLCDIDDEFKSRPLWRQAEPRFLWNSYLLEPLIENKLDQYLLPVIQGSFQNIHAEVGSEKVDVTLIARRCTGRIGTRMWRRGADPEGYAANFVESEQILQSKGYTASYVQVRGSMPFLWEQIVDLTYKPSFDVVRQEEAPRVLERHFNDLKKKYGAVLAVDLVNTGGGEGRLRERYAKSIEPILNDDLR…	1.17	1.02	1.115	0.95	0.875	1.09	1.13, 1.21	0.98, 1.06	1.04, 1.19	0.92, 0.98	0.87, 0.88	1.06, 1.12	0.04	0.04	0.075	0.03	0.005	0.03
p11652	TPM=69.69 Putative ortholog: Os06g05900 methyltransferase, putative, expressed comp2611_c0_seq1_g1277	MGATVTG[IL]DAGDEN[IL]K, [IL]VTPEE[IL]V[IL]A[IL]QR, [IL][IL]P[IL]GTHEWSK	3	MLHRVAPSLRRALASSTAPLRGARLPDPLLPSPHAQWRRCASAAASASSSSLPPPPPSPPQGPSRHGGGGSSTSSLNPAEVAKFASIAETWWDSQGPFKPLHLMNPARLSFIRSTLCRHFRRDPYSAKPLEGLKLIDVGCGGGILSEPLARMGATVTGIDAGDENIKIAHIHAASDPTTASIEYCCTTAEDLVKENRQFDAVISLEVIEHVDNPLEFCKSLSALTVPNGATVLSTINRSMRAYATAIIGAEYILRLLPIGTHEWSKLVTPEELVLALQRASISVEEMSGFVYNPFTQGWSLSDDISINYIAYGIKKSETPSTISQ	1.02667	1.06	0.953333	0.926667	1.03667	0.9	1.08, 1.07, 0.93	1.02, 1.07, 1.09	1.0, 0.96, 0.9	0.92, 0.89, 0.97	0.94, 1.0, 1.17	0.98, 0.89, 0.83	0.0484195	0.0208167	0.0290593	0.0233333	0.0688799	0.043589
p3254	TPM=31.92 TMHMM=2 Putative ortholog: Os06g41090 anthranilate phosphoribosyltransferase, putative, expressed comp3193_c0_seq1_g817	MPSVP[IL]NFFR, VNV[IL]EAQD[IL][IL]PNDK, [IL]MGV[IL]SP[IL][IL]AVAR	3	MMQRPFRPEEYSLKETTPHLGGTAMGDKHTTTYDLVEQMQYLYVRVVKAKELPSKDITGSCDPYVEVKLGNYKGTTRHFEKKSNPEWNQVFAFSKERIQASVVEIIVKDKDFVKDDYIGRVLFDLNEVPKRVPPDSPLAPQWYRLEERNGHKVKGELMLAVWMGTQADEAFPEAWHSDAASIPGDGLASIRSKVYLTPKLWYLRVNVIEAQDLIPNDKTRFPEVYVKAMLGNQALRTRVSPSRTLNPMWNEDLMFVAAEPFEEHLILSVEDRIAPGKDDVIGRTVISLQHVPRRMDYKMLNSQWYNLEKHIIVDGEQKKETKFSSRIHLRVCLEGGYHVLDESTHYSSDLRPTAKQLWKQNIGVLELGILTAQGLLPMKTKDGRGTTDPYCVAKYGQKW…	1.03333	0.926667	1.06333	1.02667	0.893333	1.15333	1.05, 1.0, 1.05	0.86, 1.02, 0.9	1.01, 1.05, 1.13	0.96, 1.05, 1.07	0.82, 1.01, 0.85	1.17, 1.03, 1.26	0.0166667	0.048074	0.0352767	0.0338296	0.0589727	0.0669162
p6803	TPM=97.59 Putative ortholog: Os09g33500 transketolase, putative, expressed comp1102_c0_seq2_g1017	MVGYA[IL]QAAD[IL][IL]SK, SNYMSAGQ[IL]NVP[IL]VFR, [IL]AFPQVED[IL]VR, [IL]AGADVPTPYAAN[IL]ER	4	TYPRSPPPPPTPSSPSDAASASPPRTGPLAASTPATPPLRSRGGSKMLGAARRQLGSGPMLGQVLRRLRPASAEATRAFSAGAKEITVREALNSALDEEMSADPSVFVMGEEVGEYQGAYKITKGLLDKYGPDRVLDTPITEAGFTGIGVGAAYQGLRPVIEFMTFNFSMQAIDHIINSAAKSNYMSAGQINVPIVFRGPNGAAAGVGAQHSQCYAAWYAHVPGLKVLTPYSAEDARGLLKAAIRDPDPVVFLENELLYGESFPISAEVLDSSFTVPIGKAKIEREGKDITITAFSKMVGYALQAADILSKEGISAEVINLRSIRPLDRAAINASVRKTNRLVTVEEGFPQHGVGAEICMSVVEESFEYLDAPVERIAGADVPTPYAANLERLAFPQVE…	1.095	1.0475	1.0425	0.9525	0.96	0.9975	0.98, 1.07, 1.2, 1.13	1.03, 1.0, 1.18, 0.98	0.89, 1.09, 1.08, 1.11	0.91, 1.02, 0.9, 0.98	1.05, 0.94, 0.98, 0.87	0.86, 1.08, 0.92, 1.13	0.0466369	0.0453459	0.0512144	0.0286865	0.0376386	0.06408
p59026	TPM=708.67 comp140_c0_seq1_g73	N[IL][IL]TV[IL]SQGDVAG[IL]QVR, SS[IL]ADYSVA[IL]HE[IL]SR	2	MDLLSNASAPLSSVPAEYVFPPEKRASLLGDLSSDDVSLPLIDLHSGALSDGILRRQVATEIVKAGKEFGFFQVVNHGVGEDVVRAFREAATKFFEMPPEDKLRYCSDDQSKPFRIASKTPWDRNKNRYWRDYLKLICYPIDEELVQHWPSKPEAFRSSLADYSVALHELSRNLLELIAEGLGLERGFFGGDLSRGNTQMNVNYYPPCPDPSLTMGLLPHCDRNLLTVLSQGDVAGLQVRHNGRWLLVKPLPGVFVVNFGHQIEIVTNGALASVEHRVFTNSAKARLSLATLVHPTMDCLVGPAPVMVSEENPAKFREFVFSEFYKTFDAAAGNREDVLESFKIRRG	1.03	0.965	0.97	0.95	0.945	1.005	1.12, 0.94	0.96, 0.97	0.96, 0.98	0.86, 1.04	0.86, 1.03	1.0, 1.01	0.09	0.005	0.01	0.09	0.085	0.005
p8537	TPM=154.8 Putative ortholog: Os05g49800 ketol-acid reductoisomerase, chloroplast precursor, putative, expressed comp1161_c0_seq1_g289	N[IL]FP[IL][IL]PEAFK, Q[IL]GV[IL]GWGSQGPAQAQN[IL]R, TTVEG[IL]TG[IL][IL]SK, VGAAMPS[IL]DFDTAVFNK	4	AVAATRRRAVAAMVAAPAKVGAAMPSLDFDTAVFNKEKVSLAGHEEYIVRGGRNLFPLLPEAFKGVKQIGVIGWGSQGPAQAQNLRDSLTEAKSDIVVKIGLRKGSKSFEEARAAGFTEENGTLGDIWETVSGSDLVLLLISDSAQADNYEKIFSHMKPNSILGLSHGFLLGHLQSAGLDFPKNISVVAVCPKGMGPSVRRLYVQGKEVNGAGINASFAVHQDVDGRATDVALGWSVALGSPFTFATTLEQEYKSDIFGERGILLGAVHGIVEALFRRYTEQGMDEELAYKTTVEGITGIISKTISKKGMLEVYNSLSEEGKKEFNKAYSASFYPCMDILYECYEDVASGSEIRSVVLAGRRFYDKEGLPAFPMGKIDQTRMWKVGEKVRATRPQGDLG…	0.9425	1.0075	0.9475	1.0075	1.07	0.94	0.93, 0.93, 0.99, 0.92	1.06, 0.9, 1.09, 0.98	1.01, 0.91, 1.0, 0.87	1.08, 0.98, 1.02, 0.95	1.14, 0.97, 1.1, 1.07	0.95, 1.01, 0.92, 0.88	0.0160078	0.0426956	0.0342479	0.0280995	0.0362859	0.0273861
p2403	TPM=66.46 SignalP=yes Putative ortholog: Os05g32630 mitochondrial carrier protein, putative, expressed comp2250_c0_seq1_g1420	N[IL]SDVFWEA[IL]K, SVAT[IL][IL]TYP[IL][IL]R	2	MEGEEGGGGVDWDSLAEAASGAVGALVSTTVLYPLDTCKTKFQADVQTDHGGHKYRNLSDVFWEAIKKKQFLSLYQGLKTKNIQSFISQFVYFYGYSYFKRVYLEKSGAKSIGTKANLLIAAAAGACTVVVTQPLDTASSRMQTSAFGKSKGLRATLAEGTWLEAFDGLGISLMLTCNPSIQYTVFDQLKHKLIQRQKSKAESAGDSTPVALSAFSAFLLGAISKSVATILTYPLIRCKVMIQAADPDDDDEDESERPGHSRPPKTMLGAMCAMWHNEGIPGFFKGIHAQILKTVLSSALLLMIKEKISKFTWISLLALRRYLFVSQKRIKSA	1	1.075	1.075	1.08	1.085	1	0.9, 1.1	1.06, 1.09	1.05, 1.1	1.16, 1.0	1.18, 0.99	0.99, 1.01	0.1	0.015	0.025	0.08	0.095	0.01
p12691	TPM=42.51 Putative ortholog: Os07g30170 nitrilase, putative, expressed comp2976_c0_seq1_g663	NAA[IL]ANSYFVGS[IL]NR, YNMV[IL]VSP[IL][IL]ER	2	MESSNGKPPQGKEEGKAAVAAEGSIGGYESLHRLLESNLSPELFKEASRLLLGLNCARPLEAISLPGAATALAEAHDFDVQAFRFSADKEQMRQPRIVRVGLVQNSIAVPTTCHFADQKKAIMEKVKLIVDAAGASGVNVLCLQEAWTMPFAFCTREKRWCEFAEPVDGESTQFLQDLAQKYNMVIVSPILERDINHGEVIWNTVVVIGNNGNIIGIHRKNHIPRVGDFNESTYYMEGNTGHPVFETAYGKIAVNICYGRHHPLNWLAFGLNGAEIVFNPSATVGELSEPMWPVEARNAAIANSYFVGSINRVGTEVFPNAFTSGDGKPQHADFGHFYGSSHFSAPDASCTPSLSRYRDGLMISDMDLNLCRQIKDKWAFRMTARYDMYANLLSEYMKP…	1.09	1.03	1.055	0.975	0.95	1.025	1.24, 0.94	1.13, 0.93	1.14, 0.97	0.92, 1.03	0.91, 0.99	1.01, 1.04	0.15	0.1	0.085	0.055	0.04	0.015
p10385	TPM=77.41 Putative ortholog: Os03g08450 eukaryotic translation initiation factor 3 subunit K, putative, expressed comp2356_c0_seq1_g5	NAADTVPFEH[IL]TR, T[IL][IL]V[IL]SHY[IL]ETGR	2	ANPETLSIHHLPPPQRRHTPRVSRSSHPALGFPTPATMTNDQPAETFTVEEIVAANPYNPDILNDLEVFVNEQVSSQAYNLDANLSLLRLYQFEPERLSVQIVARILIKALMAMPAPDFSLCLFLIPEHVQMEEQFKTLIVLSHYLETGRFRQFWDEASKNRNILEVVPGFEQAIQGYAIHVLSLTYQKVPRPVLAEAINIEGLALDKFMEYHAANSGWVIEKGGRSQLIVLPRNEFNHPELKKNAADTVPFEHITRIFPVLS	1.03	0.96	0.985	0.96	0.935	1.025	1.07, 0.99	0.97, 0.95	1.03, 0.94	0.97, 0.95	0.91, 0.96	1.06, 0.99	0.04	0.01	0.045	0.01	0.025	0.035
p692	TPM=14.07 TMHMM=1 Putative ortholog: Os01g39780 expressed protein comp12583_c0_seq1_g309	NAEAAAAAAAAAPPAP[IL]AK, VFPP[IL]SQDEQR	2	PVNRKNKEKGGKGFTQLSLSRRRRHPRRRPGPRSSCDLVVMATPVKPESAAAAPKAPQPQPPVKGAIMRRVFPFLLATNVFIGVYVFAKTYKRDQDKKNAEAAAAAAAAAPPAPIAKPAEPAPPPKRVFPPLSQDEQRQVYKWMLEEKRRTKPQTAAEKTKINEEKALLKDIIRAEYLPRLW	1.025	0.985	1.015	0.99	0.965	1.025	1.01, 1.04	0.99, 0.98	1.07, 0.96	1.06, 0.92	0.99, 0.94	1.08, 0.97	0.015	0.005	0.055	0.07	0.025	0.055
p92792	TPM=15.07 comp12739_c0_seq1_g117	NCT[IL]PVAPVAGEVAVGAPPPPR, SVAE[IL]VAEVEEAR	2	MAEGRTPRSRRWSDIADEEDEEMAISEASSKRSYSDVVKDGSPSPARAASPEVLQRGGASSSRPQAVRRLASVVSRPVPPRAAGGGAQQGLGGAQQGLGGRRGPQPKRQRHRAPLPSYVVPPGVPAGFAGLCFNCAEPGHVAGMCTGPRRCLNCKSENHVARNCTLPVAPVAGEVAVGAPPPPRGGPPPQARPPSPAVAQDVGAQGERYRIPARQRLGARGGSPPPPPPPALQGRLGDRGDRGDRGAPATESPYERGLRVERAIRAEPPLRPEERAEGRSFLDREAVREQMLRGAALRSVAELVAEVEEARPARERGIIYRTQEVEGAERALRWGLVAFVSGTRRLVSGAAASAAILERFPELDGHFSVHAFWPAELLLVFDSRAMRDTLLTSAANPFD…	1.3	0.905	1.03	0.83	0.72	1.13	1.51, 1.09	0.86, 0.95	0.9, 1.16	0.59, 1.07	0.57, 0.87	1.04, 1.22	0.21	0.045	0.13	0.24	0.15	0.09
p7108	TPM=82.85 Putative ortholog: Os03g59020 T-complex protein, putative, expressed comp1357_c0_seq1_g319	NEEGGNSVATV[IL][IL]R, [IL]WD[IL]FVTK	2	RLPLGFFRSASPHSGHHQISSASPPPTMVGLTGGSSYGMQSMLKDGHKHLSGLDEAVLKNIGAARELSAITRTSLGPNGMNKMVINHLDKLFITNDAATIVNELEVQHPAAKLLVLAARAQQEEIGDGANLTISFAGELLEKAEELIRMGLHPSEIIIGYTKAINKTLEILEDLVEKGSENMDVRNMEEVVLRMKSAVASKQFGQEDVLCPLVADACIQVCPKNPANFNVDNVRVAKLVGGGLHNSSVVRGLVLKNDAVGSIKRVEKAKVAVFAGGVDTSATETKGTVLIHSAEQLENYAKTEEAKVEELIKAVADSGAKVIVSGAAVGDMALHFCERYKLMVLKVSSKFELRRFCRTTGSIALLKLSRPNADELGYADSVSVEEIGGARVTVVKNEEG…	1.02	0.975	1.085	1.065	0.96	1.12	1.03, 1.01	0.92, 1.03	1.11, 1.06	1.08, 1.05	0.89, 1.03	1.21, 1.03	0.01	0.055	0.025	0.015	0.07	0.09
p10322	TPM=113.05 Putative ortholog: Os05g44050 ras-related protein, putative, expressed comp1362_c0_seq1_g1455	NEPEEE[IL]YMPDTVDVVGGNR, TS[IL]MNQYVNK	2	MASRRRTLLKVIILGDSGVGKTSLMNQYVNKKFSNQYKATIGADFLTKEVQFEDRLFTLQIWDTAGQERFQSLGVAFYRGADCCVLVYDVNSMKSFDNLNNWREEFLIQASPSDPDNFPFVLLGNKVDIDGGNSRVVSEKKAKAWCASKGNIPYFETSAKDGLNVEEAFQCIVKNALKNEPEEELYMPDTVDVVGGNRAQGSSGCC	0.98	0.975	1.01	1.025	0.995	1.045	1.0, 0.96	0.91, 1.04	1.08, 0.94	1.08, 0.97	0.91, 1.08	1.19, 0.9	0.02	0.065	0.07	0.055	0.085	0.145
p3749	TPM=27.01 TMHMM=9 SignalP=yes Putative ortholog: Os01g35030 MDR-like ABC transporter, putative, expressed comp3982_c0_seq1_g96	NEQVSEEE[IL][IL]AVAEAANAHR, NPS[IL][IL][IL][IL]DEATSA[IL]DAESER, [IL]G[IL]VSQEP[IL][IL]FTTT[IL]R	3	MAVGAAAAMANGIAMPFLAFLVGDLVDAFGPAHRANVVHAVAKVSVRFVYLAIASGVAGFLQVSCWMVTGERQAARIRGLYLETILRQDISFFDVETSTGEVIERMSSDTVLIQDAIGEKVGKFLQLISTFLGGFIIAFSRGWLLSLVMLSSIPPVVASAAVMSLVLSKLSYRSQMAYAEAGKVVEQTIGSIRTVVSFTGERRAIDKYQEFLKISYRSTVHQGTAGGLGIGSLLLIVFCSYGLAVWYGARLIIEKGYTGGYIINVLMAIMTGAMALGQSSPCLTAFASGQIAAHKMFATIYRKPEIDASDKGGIILDNFVGDVELKDVNFSYPARPEQRIFNGFSISIPTGTTVALVGESGSGKSTVISLVERFYDPQSGEVLLDGVNLKELNLSWIRQ…	1.07333	1.05667	1.03333	0.973333	0.973333	1.02	0.96, 1.17, 1.09	0.83, 1.33, 1.01	1.06, 0.96, 1.08	1.11, 0.82, 0.99	0.87, 1.13, 0.92	1.27, 0.72, 1.07	0.0611919	0.146211	0.0371184	0.0841295	0.079652	0.160728
p11169	TPM=64.07 Putative ortholog: Os01g24690 60S ribosomal protein L23A, putative, expressed comp2434_c0_seq1_g311	NK[IL]DQYQ[IL][IL]K, YP[IL]TTESAMK, [IL]DQYQ[IL][IL]K	3	PAAATGPTRSPSPPPPKQTCSAATAVMKAKVPAKKSDGKAQALKVAKAVKAGSIKNKSKKIRTSVTFHRPRTLKKPRDPKYPRKSAPGRNKLDQYQILKYPLTTESAMKKIEDNNTLVFIVDLKSDKKMIKAAVKKMYDIQAKKVNTLIRPDGKKKAYVKLTPDYDALDVANKIGII	0.906667	1.00333	0.9	1.00333	1.12333	0.896667	0.97, 1.02, 0.73	1.04, 1.0, 0.97	0.96, 0.92, 0.82	0.99, 0.91, 1.11	1.07, 0.98, 1.32	0.92, 0.93, 0.84	0.0895048	0.0202759	0.0416333	0.0581187	0.101708	0.02848
p8922	TPM=240.36 Putative ortholog: Os02g57590 rRNA 2-O-methyltransferase fibrillarin 2, putative, expressed comp760_c0_seq3_g1102	NMVPGESVYGEK, [IL]AAAV[IL]GGVDN[IL]W[IL]APGTR	2	ATLGPEPFSKTLNPFLLLRRRRRPPAPPQLSTMRPPMRGGGGRSGGRSFGGRDSGGRGRGFGGRSDGGGRGRGGGRSDRGRGRGGGRGGGRGGPGMKGGSKVVVVPHKHDGVFIAKAKEDALCTKNMVPGESVYGEKRVSVQNEDQSKVEYRVWNPFRSKLAAAVLGGVDNIWIAPGTRVLYLGAASGTTVSHVSDIVGPTGLVYAVEFSHRSGRDLVNMAKKRTNVIPIIEDARHPAKYRMLVGMVDVIFSDVAQPDQARILALNASYFLKSGGHFVISIKANCIDSTMPAEAVFANEVEKLKADQFKPSEQVTLEPFERDHACVVGGYRMPKKQKPT	0.995	0.96	0.94	0.95	0.97	0.985	0.97, 1.02	1.01, 0.91	0.9, 0.98	0.93, 0.97	1.05, 0.89	0.89, 1.08	0.025	0.05	0.04	0.02	0.08	0.095
p6818	TPM=131.96 Putative ortholog: Os06g07630 26S protease regulatory subunit 6A, putative, expressed comp1078_c0_seq1_g1104	NN[IL]E[IL]ENFK, TM[IL]E[IL][IL]NQ[IL]DGFSSDER, [IL]AGPQ[IL]VQMF[IL]GDGAK	3	MAVDDAAEDDQLASMATDDIVRASRLLDNEVRVLKDELQRNNLELENFKDKIKENQEKIKLNKQLPYLVGNIVEILEMNPEDEAEEDGANIDLDSQRKGKCVVLKTSTRQTIFLPVIGLVDPDNLKPGDLVGVNKDSYLILDTLPSEYDSRVKAMEVDEKPTEDYNDIGGLEKEIQELVEAIVLPMTHKEQFQKLGIRPPKGVLLYGPPGTGKTLMARACAAQTNATFLKLAGPQLVQMFIGDGAKLVRDAFELAKEKAPCIIFIDEIDAIGTKRFDSEVSGDREVQRTMLELLNQLDGFSSDERIKVIAATNRADILDPALLRSGRLDRKIEFPHPKEEARARILQIHSRKMNVNPDVNFEELARSTDDFNGAQLKAVCVEAGMLALRRDATEVIHED…	1.03667	1.13	1.17667	1.14333	1.08667	1.04667	1.05, 1.12, 0.94	1.1, 1.28, 1.01	0.98, 1.28, 1.27	0.94, 1.15, 1.34	1.05, 1.14, 1.07	0.89, 1.0, 1.25	0.0523874	0.0793725	0.0983757	0.115518	0.0272845	0.10651
p1124	TPM=8.98 TMHMM=3 Putative ortholog: Os01g63580 glycerol-3-phosphate acyltransferase, putative, expressed comp14309_c0_seq1_g1376	NQ[IL][IL]TP[IL][IL][IL]HDGR, TV[IL]DP[IL]EVAVA[IL]GR	2	MKACPKLIAVLAVLLRSPLSPSYHHQPSACIFTLPSPPLHCHTARRPVRSEQQAMTSSMRFKPVEECSSEGRSEQTVAADFDGTLLRSSNAFPYYLLVALEAGSVLRAVALLLSVPFVYATYIFFSETLAIATLVYISTAGLKVRSIEMAARSVLPRFYAEDVHPESWRVFRSFGKRYVITASPRVMVEPFAREFLGADRVVGTELEVGKNGKATGFMVKPGVLVGDHKKQAVLKELGDAVPDVGMGDRASDFDFMSLCKEAYLVTPRKYSPVPKNQLLTPLILHDGRLVQRPTPLVALVTFLWMPFGFALALLRVYINLPLPERYVFYIYHMMGIRLIVKGNPPPPPKKGSPGVLFVCNHRTVLDPIEVAVALGRKVSCVTYSISKFSELISPIKAVA…	1.23	1.005	1.01	0.84	0.84	1.005	0.99, 1.47	0.93, 1.08	0.93, 1.09	0.94, 0.74	0.95, 0.73	1.0, 1.01	0.24	0.075	0.08	0.1	0.11	0.005
p65174	TPM=39.2 comp2057_c0_seq2_g688	NTFG[IL]AAGGP[IL]QVTP[IL]QPGASAR, S[IL]PDDNEFSK	2	NDLGRGDEISTVVVVSLRIPLISITFARTHNCLAHRRVQYHRARRPPTATARQIPRPPRLRGRRRRPVCVGRCRQPRRGKMSGHDSKYFSTTKKGEIPELKEELNSQYKDKRKDAVKKVIAAMTVGKDVSSLFTDVVNCMQTENLELKKLVYLYLINYAKSQPDLAILAVNTFVKDSQDPNPLIRALAVRTMGCIRVDKITEYLCDPLQRCLKDDDPYVRKTAAICVAKLYDINAELVEDRGFLEALKDLISDNNPMVVANAVAALAEIQESSARPIFEITSHTLTKLLTALNECTEWGQVFILDSLSRYKATDARDAENIVERVTPRLQHANCAVVLSAVKIILLQMELITSTDVVRNLCKKMAPPLVTLLSAEPEIQYVALRNINLIVQKRPTILAH…	1.035	1	1.085	1.055	0.97	1.09	1.09, 0.98	0.93, 1.07	0.99, 1.18	0.91, 1.2	0.85, 1.09	1.07, 1.11	0.055	0.07	0.095	0.145	0.12	0.02
p49007	TPM=2.33 TMHMM=1 SignalP=yes comp36775_c0_seq1_g176	NWYVSTSGDDTEEEHTPVEGR, [IL]GQGEFSVPDPGQQPFQSENWSEK	2	PPLIVLSAAGVALSVPFAAYLASLAATDYLTRALLRACQPPAQPYHHHRQEYDDGVEQEFLDAPGAYFRDAPPLGHFSAEPAQGGEDESDAPLLLPRHPGFSADAGAKEEGGEFSARESGKNWYVSTSGDDTEEEHTPVEGREALSGDFAVSASAKNEDSQVQKLGQGEFSVPDPGQQPFQSENWSEKEGDVYSKYKEDDGRTT	0.99	0.965	0.955	0.965	0.975	0.99	0.93, 1.05	0.9, 1.03	0.95, 0.96	1.02, 0.91	0.97, 0.98	1.05, 0.93	0.06	0.065	0.005	0.055	0.005	0.06
p14298	TPM=37.55 Putative ortholog: Os10g40540 enoyl-CoA hydratase/isomerase family protein, putative, expressed comp3828_c0_seq1_g422	P[IL]SHEFSEGVR, [IL]VTDDPSV[IL]DTS[IL]AQYGD[IL]VYPDK	2	ATGGVRYLSSLRPSPATAAASDSDEVLVEGKASARAAVLNRPGHLNALTTTMGARLNKFYASWEDSPDIGFVMMKGSGRAFCAGGDIVRLHKLMNEGKLDECKDFFRTLYSFIYVLGTYLKPHVAILDGVTMGGGGGVSIPGTFRVATDRTVFATPEVHIGFHPDAAASFYLSHLTGHVGEYLALTGEKINGVDMVALGLATHYSMADHLELVDERLARLVTDDPSVIDTSLAQYGDLVYPDKTSIVHRLEVIDKCFSHETVEEIVDALESEAARLNEEWCTLALKRLKEASPLALKVSLRSIREGRYQTLDECLVREYRMSVNGISKPLSHEFSEGVRARLVEKDLAPKWDPPALEFVSEDMVDSYFAPLGEFDAELKLPTELREAFV	0.995	0.995	0.975	0.985	0.995	0.985	1.06, 0.93	1.09, 0.9	1.05, 0.9	0.99, 0.98	1.02, 0.97	0.97, 1.0	0.065	0.095	0.075	0.005	0.025	0.015
p5255	TPM=137.48 TMHMM=2 Putative ortholog: Os09g32250 DNA repair ATPase-related, putative, expressed comp696_c0_seq1_g1253	PA[IL]ESF[IL]EK, QAQAT[IL]SDY[IL]HR, TAEPYVEN[IL]STK, WAEPH[IL]ETAK, [IL]TT[IL]QSE[IL]TA[IL]QK	5	TRHGTHEPGTGPALPLATTTQLTLPWRSWASSIEPKDLGFGEAATRLGMGISMRLLLAVALLLAAVLAGAAAEEQAVPVDLAGEIAGGVKEAAEANALRAELAQLTEKISALESGIAERSQDLKSKDAGIAKLEKDIEEKSQKITTLQSEITALQKKGSVAAEEQAAKAIARAVELEKQIDILNKEIEAQSSQRTALEARANKAEKKVQDLNSKLESLQKASGEQKRTIQKTERALKVAEEELMRLQNEATTKSKQLTEVHGAWLPPWLVTYSARYAEVVSGHWNEHGKPALESFLEKASEKSAQAKKWAEPHIETAKMKLVPVKEKLAELKKTAEPYVENLSTKSVEVYEASRDAVTPHIVKLKAFADPYCQEAKKLSKPYIDQVAEVTKPHVEKVRT…	1.02	1.128	1.024	1.004	1.102	0.928	1.01, 0.93, 1.12, 1.01, 1.03	1.36, 0.8, 1.16, 1.08, 1.24	1.19, 0.91, 0.99, 1.09, 0.94	1.18, 0.98, 0.88, 1.07, 0.91	1.35, 0.86, 1.04, 1.06, 1.2	0.88, 1.14, 0.85, 1.01, 0.76	0.0303315	0.0941488	0.0515364	0.054827	0.0822435	0.0664379
p9808	TPM=5141.04 Putative ortholog: Os03g08010 elongation factor Tu, putative, expressed comp15_c0_seq2_g1526	PGQ[IL]VTFGPTG[IL]TTEVK, PMVVETFAQYPP[IL]GR, YAWV[IL]DK, YSCTV[IL]DAPGHR	4	MGKEKIHISIVVIGHVDSGKSTTTGHLIYKLGGIDKRVIERFEKEAAEMNKRSFKYAWVLDKLKAERERGITIDIALWKFETTKYSCTVIDAPGHRDFIKNMITGTSQADCAVLIIDSTTGGFEAGISKDGQTREHALLAFTLGVKQMICCCNKMDATTPKYSKGRYEEIVKEVSSYLKKVGYNPDKVPFVPISGFEGDNMIERSTNLDWYKGPTLLEALDQINEPKRPSDKPLRLPLQDVYKIGGIGTVPVGRVETGVIKPGQLVTFGPTGLTTEVKSVEMHHESMLEAGPGDNVGFNVKNVAVKDIKRGYVASNAKDDPAKEAASFVAQVIIMNHPGQIGNGYAPVLDCHTSHIAVKFSEIQTKVDRRSGKEIEAFPKFLKNGDAGFVKMIPTKPMV…	0.965	1.075	0.95	0.9875	1.1225	0.885	0.93, 1.0, 0.8, 1.13	1.22, 1.07, 0.96, 1.05	0.93, 0.96, 0.84, 1.07	1.0, 0.96, 1.04, 0.95	1.31, 1.07, 1.19, 0.92	0.76, 0.89, 0.87, 1.02	0.0688598	0.053929	0.0474342	0.0205649	0.0834041	0.0533073
p322	TPM=13.29 TMHMM=1 SignalP=yes Putative ortholog: Os07g48330 cytochrome P450, putative, expressed comp11132_c0_seq1_g1405	PQ[IL]HSY[IL]PFGAGAR, [IL][IL]APEFFHDK	2	MAGTSMAVTAVASLCCVGFCSLLLYLYRILWLAPERVRRELRAQGIRGPPPSFPYGNVADMRQAAADVAAKRREDAGGVTGIVHDYRPAVFPYYEKWRNEYGPVFSYSVGNMVFLHATDPAVVRDVCLCVSPDDLGKSSYMKTTHRPLFGDGILKSNGDAWTRQRKLIAPEFFHDKVKGMVDLMVGSAQALVRAWEDRVAAGSGVLDLNVDDDLRAYSADVISRTCFGSSYVRGKKIFAMIRELQKTVTKPNLLAEMTGLSFLPTTSNRAAWRLNRRVRSLILDVVKESGGRDEDDGPNLLTAMLRSAKAEAGSVAAAEDFVVDNCKSIYFAGYETTAVTAAWCLMLLALHPDWQRRVRDEALEALADGAAPDSLSLQKMKQLTMVIQETLRLYPAGSV…	0.98	1.125	0.99	1.01	1.145	0.885	0.95, 1.01	1.03, 1.22	0.95, 1.03	1.0, 1.02	1.08, 1.21	0.93, 0.84	0.03	0.095	0.04	0.01	0.065	0.045
[truncated: 94 more rows]

## Sheet: Table S2
Table S2. L. multiflorum protein profiling results of fraction S1.
[truncated: 836 more rows]

[truncated: 6 more sheets: Table S3, Table S4, Table S5, Table S6, Table S7, Table S8]
